# Supplementary material
Source: Research Square preprint supplement (doi:10.21203/rs.3.rs-9882771/v1)
Supplement: Supplementary file 2 [file d02035639c55e57c4ed00b01.xlsx]

## Sheet: analysis_panel_with_regimes
week_date	market	price	open	high	low	volume	change_pct_reported	log_return	rvol_4w	lcvar_52w	illiq_proxy	mcon_corr_proxy_26w	F_Liq_proxy	F_Vol_proxy	F_Absorb_proxy	F_MCon_corr_proxy	MEFI_INT_proxy	MEFI_component_count	GPR_level	GPR_log_change	High_GPR_proxy_p75	VIX_weekly_avg	VIX_weekly_change	Brent_weekly_avg	Brent_log_return	OILVOL_realized_weekly	US10Y_weekly_last	US10Y_weekly_change	gpr_dlog	gpr_level_log	vix_change	oil_vol	us10y_change	return	MEFI_INT	F_Liq_w	F_Vol_w	F_Absorb_w	F_MCon_w	MEFI_INT_w	MEFI_component_count_w	MEFI	P_high_gpr	S_high_gpr	GPR_x_HighRegime	MEFI_lag1	return_lag1
2010-01-03	EGX30	6436.87	6214.28	6451.92	6208.34	255580000	0.0367								0.979749		0.979749	1	97.5224	0.12332	0	19.148		79.818		0.0201703	3.83		0.12332	4.58008		0.0201703			0.979749			0.959238		0.959238	1	0.959238	0.998841	1	0.12332
2010-01-10	EGX30	6680.8	6467.42	6680.8	6436.54	408200000	0.0379	0.0371953			9.11204e-05		0.748488		0.890447		0.819467	2	97.5224	0.12332	0	17.838	-0.22	78.31	-0.0409209	0.0268501	3.7	-0.13	0.12332	4.58008	-0.22	0.0268501	-0.13	0.0371953	0.819467	0.576839		0.847731		0.712285	2	0.712285	0.999797	1	0.12332	0.959238
2010-01-17	EGX30	6864.19	6704.47	6893.57	6656.92	442230000	0.0275	0.0270803			6.12358e-05		0.497985		0.870535		0.68426	2	97.5224	0.12332	0	21.46	9.4	74.2825	-0.0551015	0.031831	3.62	-0.08	0.12332	4.58008	9.4	0.031831	-0.08	0.0270803	0.68426	0.383108		0.822869		0.602988	2	0.602988	0.999516	1	0.12332	0.712285	0.0371953
2010-01-24	EGX30	6696.07	6777.8	6777.8	6551	290000000	-0.0245	-0.0247973			8.55078e-05		0.701441		0.959609		0.830525	2	97.5224	0.12332	0	24.29	-2.69	71.882	-0.0212611	0.0318914	3.63	0.01	0.12332	4.58008	-2.69	0.0318914	0.01	-0.0247973	0.830525	0.540454		0.93409		0.737272	2	0.737272	0.994702	1	0.12332	0.602988	0.0270803
2010-01-31	EGX30	6979.2	6865.65	7055.09	6699.54	362080000	0.0423	0.0414135	0.0306102		0.000114377		0.943429	0.563493	0.917433		0.808118	3	97.5224	0.12332	0	23.572	1.49	72.54	-0.0154274	0.0752261	3.59	-0.04	0.12332	4.58008	1.49	0.0752261	-0.04	0.0414135	0.808118	0.727601	0.398607	0.881427		0.669212	3	0.669212	0.928979	1	0.12332	0.737272	-0.0247973
2010-02-07	EGX30	6933.04	6832.66	7031.49	6781.78	313480000	-0.0066	-0.00663591	0.0303534		2.11685e-05		0.162129	0.557765	0.94587		0.555254	3	59.4904	-0.494267	0	24.92	-3.38	70.852	0.0194921	0.0326008	3.69	0.1	-0.494267	4.08581	-3.38	0.0326008	0.1	-0.00663591	0.555254	0.123367	0.394161	0.916935		0.478154	3	0.478154	0.0326006	0	0	0.669212	0.0414135
2010-02-14	EGX30	6860.7	6958.87	7076.6	6860.7	312020000	-0.0104	-0.0104889	0.0287748		3.36162e-05		0.266469	0.522546	0.946724		0.578579	3	59.4904	-0.494267	0	21.155	-2.71	75.8	0.0726882	0.0510063	3.78	0.09	-0.494267	4.08581	-2.71	0.0510063	0.09	-0.0104889	0.578579	0.20406	0.366827	0.918002		0.496296	3	0.496296	0.00115846	0	0	0.478154	-0.00663591
2010-02-21	EGX30	6719.35	6831.2	6831.2	6543.85	337810000	-0.0206	-0.0208181	0.0276858		6.16265e-05		0.50126	0.498249	0.931634		0.643714	3	59.4904	-0.494267	0	20.236	-0.52	76.226	-0.00678677	0.0445754	3.61	-0.17	-0.494267	4.08581	-0.52	0.0445754	-0.17	-0.0208181	0.643714	0.385641	0.347969	0.899159		0.544256	3	0.544256	5.5558e-05	0	0	0.496296	-0.0104889
2010-02-28	EGX30	6783.83	6670.71	6842.57	6625.78	361090000	0.0096	0.00955042	0.0126111		2.64489e-05		0.20639	0.161923	0.918012		0.428775	3	59.4904	-0.494267	0	18.658	-2.08	77.862	0.0365173	0.0310459	3.69	0.08	-0.494267	4.08581	-2.08	0.0310459	0.08	0.00955042	0.428775	0.157597	0.0869384	0.882151		0.375562	3	0.375562	1.64834e-05	0	0	0.544256	-0.0208181
2010-03-07	EGX30	6769.08	6779.89	6831.27	6684.56	272070000	-0.0022	-0.00217666	0.0128602		8.00035e-06		0.0517489	0.167481	0.9701		0.396443	3	44.6213	-0.287603	0	17.984	0.16	79.364	0.00227015	0.0222398	3.71	0.02	-0.287603	3.79821	0.16	0.0222398	0.02	-0.00217666	0.396443	0.0380021	0.091252	0.94719		0.358815	3	0.358815	4.04263e-06	0	0	0.375562	0.00955042
2010-03-14	EGX30	6610.42	6761.5	6761.5	6295.6	351830000	-0.0234	-0.023718	0.0157758		6.74132e-05		0.549766	0.232528	0.92343		0.568575	3	44.6213	-0.287603	0	17.238	-0.61	79.054	-0.0128052	0.0486474	3.7	-0.01	-0.287603	3.79821	-0.61	0.0486474	-0.01	-0.023718	0.568575	0.423154	0.141737	0.888916		0.484602	3	0.484602	3.92628e-06	0	0	0.358815	-0.00217666
2010-03-21	EGX30	6765.26	6609.53	6776.81	6463.58	356460000	0.0234	0.0231535	0.0198577		6.4954e-05		0.529152	0.323599	0.920721		0.591158	3	44.6213	-0.287603	0	17.388	0.8	78.382	-0.00498882	0.0233134	3.86	0.16	-0.287603	3.79821	0.8	0.0233134	0.16	0.0231535	0.591158	0.407212	0.212419	0.885533		0.501721	3	0.501721	3.92568e-06	0	0	0.484602	-0.023718
2010-03-28	EGX30	6863.43	6788.16	6896.6	6783.95	344470000	0.0145	0.0144066	0.0206308		4.18226e-05	0.310703	0.335258	0.340848	0.927737	0.939109	0.635738	4	44.6213	-0.287603	0	17.445	-0.3	80.5875	0.0579204	0.0389026	3.96	0.1	-0.287603	3.79821	-0.3	0.0389026	0.1	0.0144066	0.635738	0.257259	0.225807	0.894293	0.907354	0.571178	4	0.571178	3.97728e-06	0	0	0.501721	0.0231535
2010-04-04	EGX30	7248.61	6906.51	7249.06	6906.51	441890000	0.0561	0.0546024	0.0322306		0.000123566	0.296966	1	0.599647	0.870734	0.884809	0.838797	4	55.6117	0.220182	0	16.498	-1.33	83.884	0.00169287	0.0328256	3.9	-0.06	0.220182	4.01839	-1.33	0.0328256	-0.06	0.0546024	0.838797	0.787169	0.426667	0.823117	0.854937	0.722972	4	0.722972	9.49564e-06	0	0	0.571178	0.0144066
2010-04-11	EGX30	7573.61	7398.77	7693.46	7398.77	780880000	0.0448	0.0438601	0.0184682		5.61675e-05	0.345541	0.455502	0.292599	0.672381	1	0.605121	4	55.6117	0.220182	0	16.324	2.22	85.234	0.0243478	0.0531143	3.79	-0.11	0.220182	4.01839	2.22	0.0531143	-0.11	0.0438601	0.605121	0.350252	0.188359	0.575446	1	0.528514	4	0.528514	9.61906e-06	0	0	0.722972	0.0546024
2010-04-18	EGX30	7467.35	7503.83	7622.54	7381.34	683590000	-0.014	-0.0141297	0.0309567		2.06698e-05	0.353676	0.157948	0.571226	0.729308	1	0.614621	4	55.6117	0.220182	0	16.496	-1.74	84.608	0.0149798	0.0334604	3.84	0.05	0.220182	4.01839	-1.74	0.0334604	0.05	-0.0141297	0.614621	0.120133	0.404608	0.646528	1	0.542817	4	0.542817	9.63097e-06	0	0	0.528514	0.0438601
2010-04-25	EGX30	7451.72	7494.39	7639.12	7414.89	465060000	-0.0021	-0.00209531	0.0337561		4.50545e-06	0.343159	0.0224535	0.63368	0.857176	1	0.628328	4	55.6117	0.220182	0	20.37	5.43	85.982	0.0011609	0.0330673	3.69	-0.15	0.220182	4.01839	5.43	0.0330673	-0.15	-0.00209531	0.628328	0.015346	0.453081	0.806189	1	0.568654	4	0.568654	1.00412e-05	0	0	0.542817	-0.0141297
2010-05-02	EGX30	7116.45	7415.92	7451.09	7116.45	517000000	-0.045	-0.0460359	0.0372487		8.90442e-05	0.261994	0.731085	0.711604	0.826785	0.746571	0.754011	4	64.0069	0.140597	0	28.538	18.9	82.496	-0.119525	0.075694	3.45	-0.24	0.140597	4.15899	18.9	0.075694	-0.24	-0.0460359	0.754011	0.56338	0.513559	0.768241	0.721493	0.641668	4	0.641668	2.84107e-05	0	0	0.568654	-0.00209531
2010-05-09	EGX30	6917.13	6750.87	7012.42	6700.77	530200000	-0.028	-0.0284081	0.018931		5.35799e-05	0.227643	0.433811	0.302923	0.819061	0.610783	0.541645	4	64.0069	0.140597	0	28.12	-9.71	78.324	-0.000653979	0.0460871	3.44	-0.01	0.140597	4.15899	-9.71	0.0460871	-0.01	-0.0284081	0.541645	0.333478	0.196372	0.758596	0.590414	0.469715	4	0.469715	2.9571e-05	0	0	0.641668	-0.0460359
2010-05-16	EGX30	6421.58	6804.28	6804.28	6421.58	424590000	-0.0716	-0.0743368	0.0303632		0.000175079	0.326653	1	0.557983	0.880856	1	0.85971	4	64.0069	0.140597	0	37.12	8.86	72.172	-0.0814721	0.0680478	3.2	-0.24	0.140597	4.15899	8.86	0.0680478	-0.24	-0.0743368	0.85971	1	0.394331	0.835757	0.968217	0.799576	4	0.799576	2.96394e-05	0	0	0.469715	-0.0284081
2010-05-23	EGX30	6337.51	6424	6524.92	5936.49	506550000	-0.0131	-0.0131782	0.0262568	0.0743368	2.60157e-05	0.301644	0.202759	0.510407	0.832899	0.903298	0.612341	4	64.0069	0.140597	0	33.94	-8.03	70.79	0.0355562	0.0749779	3.31	0.11	0.140597	4.15899	-8.03	0.0749779	0.11	-0.0131782	0.612341	0.154789	0.380148	0.775875	0.872785	0.545899	4	0.545899	2.95669e-05	0	0	0.799576	-0.0743368
2010-05-30	EGX30	6517.94	6444.7	6601.19	6381.11	583210000	0.0285	0.0280724	0.0422897	0.0601863	4.81343e-05	0.292297	0.388165	0.612937	0.788044	0.866354	0.663875	4	64.0069	0.140597	0	32.6625	3.41	72.705	-0.016018	0.0187546	3.2	-0.11	0.140597	4.15899	3.41	0.0187546	-0.11	0.0280724	0.663875	0.298176	0.44119	0.719867	0.837121	0.574088	4	0.574088	2.83465e-05	0	0	0.545899	-0.0131782
2010-06-06	EGX30	6243.09	6416.66	6416.66	6230.99	411610000	-0.0422	-0.0430831	0.04365	0.0601863	0.00010467	0.278798	0.862063	0.628111	0.888451	0.812992	0.797904	4	54.6336	-0.158342	0	32.672	-6.69	72.762	0.0198463	0.0370714	3.24	0.04	-0.158342	4.00065	-6.69	0.0370714	0.04	-0.0430831	0.797904	0.664674	0.452966	0.84524	0.785611	0.687123	4	0.687123	9.02503e-06	0	0	0.574088	0.0280724
2010-06-13	EGX30	6418.39	6305.94	6418.63	6252.6	470900000	0.0281	0.0276921	0.0345672	0.0601863	5.88067e-05	0.285373	0.477624	0.52679	0.853759	0.838983	0.674289	4	54.6336	-0.158342	0	25.874	-4.84	76.218	0.0501668	0.0332186	3.24	0	-0.158342	4.00065	-4.84	0.0332186	0	0.0276921	0.674289	0.367361	0.374328	0.801922	0.8107	0.588578	4	0.588578	8.63639e-06	0	0	0.687123	-0.0430831
2010-06-20	EGX30	6307.27	6435.52	6600.68	6281	346010000	-0.0173	-0.0174644	0.0351679	0.0601863	5.04736e-05	0.296448	0.407773	0.533491	0.926836	0.882759	0.687715	4	54.6336	-0.158342	0	27.422	4.58	76.642	-0.0109619	0.0444613	3.12	-0.12	-0.158342	4.00065	4.58	0.0444613	-0.12	-0.0174644	0.687715	0.313341	0.37953	0.893168	0.852958	0.609749	4	0.609749	8.62939e-06	0	0	0.588578	0.0276921
2010-06-27	EGX30	6033.09	6308.27	6308.27	6028.81	217370000	-0.0435	-0.0444436	0.0337118	0.0601863	0.000204461	0.330732	1	0.517248	1	1	0.879312	4	54.6336	-0.158342	0	32.13	1.59	73.858	-0.0603048	0.0556971	3	-0.12	-0.158342	4.00065	1.59	0.0556971	-0.12	-0.0444436	0.879312	1	0.366923	0.987154	0.983781	0.834465	4	0.834465	8.66984e-06	0	0	0.609749	-0.0174644
2010-07-04	EGX30	6026.87	5996.14	6074.9	5814.24	275190000	-0.001	-0.00103151	0.0302079	0.0601863	3.74837e-06	0.324377	0.0161074	0.478161	0.968274	0.993161	0.613926	4	56.5579	0.034616	0	26.795	-5.14	73.9525	0.0469634	0.0296195	3.07	0.07	0.034616	4.03527	-5.14	0.0296195	0.07	-0.00103151	0.613926	0.0104381	0.336586	0.94491	0.959532	0.562867	4	0.562867	1.06884e-05	0	0	0.834465	-0.0444436
2010-07-11	EGX30	6049.19	6080.01	6114.57	5957.1	313880000	0.0037	0.00369657	0.0217373	0.0601863	1.1777e-05	0.330433	0.0834062	0.383669	0.945636	1	0.603178	4	56.5579	0.034616	0	25.054	1.27	75.7	0.00464346	0.0335204	2.96	-0.11	0.034616	4.03527	1.27	0.0335204	-0.11	0.00369657	0.603178	0.062485	0.263249	0.916643	0.982638	0.556254	4	0.556254	1.07384e-05	0	0	0.562867	-0.00103151
2010-07-18	EGX30	6029.03	6009.22	6030.34	5911.58	276410000	-0.0033	-0.00333824	0.0223027	0.0601863	1.20771e-05	0.348841	0.0859219	0.389975	0.967561	1	0.610864	4	56.5579	0.034616	0	24.728	-2.78	76.642	0.0225111	0.0272472	3.02	0.06	0.034616	4.03527	-2.78	0.0272472	0.06	-0.00333824	0.610864	0.0644305	0.268143	0.944019	1	0.569148	4	0.569148	1.07355e-05	0	0	0.556254	0.00369657
2010-07-25	EGX30	6316.52	6089.64	6316.52	6087.71	463690000	0.0477	0.0465823	0.0235858	0.0601863	0.00010046	0.325087	0.826775	0.404289	0.857978	0.995967	0.771252	4	56.5579	0.034616	0	23.56	0.03	77.236	0.00297215	0.0455675	2.94	-0.08	0.034616	4.03527	0.03	0.0455675	-0.08	0.0465823	0.771252	0.637384	0.279252	0.80719	0.96224	0.671516	4	0.671516	1.05695e-05	0	0	0.569148	-0.00333824
2010-08-01	EGX30	6407.06	6353.69	6411.66	6273.62	385730000	0.0143	0.0142321	0.0220737	0.0601863	3.68965e-05	0.348998	0.293966	0.387421	0.903594	1	0.646245	4	43.8754	-0.253913	0	22.138	-1.76	82.694	0.047622	0.0632199	2.86	-0.08	-0.253913	3.78135	-1.76	0.0632199	-0.08	0.0142321	0.646245	0.225325	0.266161	0.864148	1	0.588909	4	0.588909	3.8744e-06	0	0	0.671516	0.0465823
2010-08-08	EGX30	6333.14	6405.42	6465.19	6322.55	311560000	-0.0115	-0.0116043	0.0257696	0.0601863	3.72459e-05	0.354304	0.296895	0.428649	0.946993	1	0.668134	4	43.8754	-0.253913	0	24.374	4.5	78.206	-0.0785469	0.0416841	2.68	-0.18	-0.253913	3.78135	4.5	0.0416841	-0.18	-0.0116043	0.668134	0.22759	0.298159	0.918338	1	0.611022	4	0.611022	3.81354e-06	0	0	0.588909	0.0142321
2010-08-15	EGX30	6388.88	6332.22	6406.56	6277.23	222620000	0.0088	0.00876282	0.0241088	0.0601863	3.93622e-05	0.344189	0.314634	0.410123	0.999035	1	0.680948	4	43.8754	-0.253913	0	25.39	-0.75	74.944	-0.0223398	0.0412989	2.62	-0.06	-0.253913	3.78135	-0.75	0.0412989	-0.06	0.00876282	0.680948	0.24131	0.28378	0.983319	1	0.627102	4	0.627102	3.81301e-06	0	0	0.611022	-0.0116043
2010-08-22	EGX30	6474.45	6391.77	6509.41	6381.29	228400000	0.0134	0.0133047	0.0120906	0.0601863	5.82517e-05	0.328719	0.472971	0.276057	0.995653	1	0.68617	4	43.8754	-0.253913	0	26.328	-1.04	72.818	0.0226059	0.0630488	2.66	0.04	-0.253913	3.78135	-1.04	0.0630488	0.04	0.0133047	0.68617	0.363763	0.179728	0.979096	0.976099	0.624671	4	0.624671	3.81496e-06	0	0	0.627102	0.00876282
2010-08-29	EGX30	6526.41	6518.98	6540	6394.89	221680000	0.008	0.00799336	0.0110634	0.0601863	3.60581e-05	0.33068	0.286938	0.264597	0.999585	1	0.63778	4	43.8754	-0.253913	0	24.33	-3.14	75.41	-0.00173114	0.0159629	2.72	0.06	-0.253913	3.78135	-3.14	0.0159629	0.06	0.00799336	0.63778	0.21989	0.170834	0.984005	0.983581	0.589578	4	0.589578	4.03093e-06	0	0	0.624671	0.0133047
2010-09-05	EGX30	6499.63	6549.44	6559.79	6446.59	175560000	-0.0041	-0.00411177	0.00744453	0.0601863	2.34209e-05	0.341687	0.181009	0.224228	1	1	0.601309	4	63.9471	0.376703	0	22.9625	0.68	77.1675	0.0329059	0.0251867	2.81	0.09	0.376703	4.15806	0.68	0.0251867	0.09	-0.00411177	0.601309	0.137968	0.140765	1	1	0.569683	4	0.569683	2.77885e-05	0	0	0.589578	0.00799336
2010-09-12	EGX30	6530.47	6519.28	6665.3	6519.28	402370000	0.0047	0.00473366	0.00730529	0.0601863	1.17645e-05	0.349672	0.0833008	0.222674	0.893858	1	0.549958	4	63.9471	0.376703	0	21.72	0.02	78.438	-0.00141963	0.0242597	2.75	-0.06	0.376703	4.15806	0.02	0.0242597	-0.06	0.00473366	0.549958	0.0624034	0.140765	0.851991	1	0.51379	4	0.51379	2.92855e-05	0	0	0.569683	-0.00411177
2010-09-19	EGX30	6720.22	6536.16	6726.28	6536.09	398390000	0.0291	0.028642	0.013863	0.0601863	7.18943e-05	0.333819	0.587328	0.295827	0.896187	1	0.694836	4	63.9471	0.376703	0	22.388	-0.3	78.378	0.01665	0.0356654	2.62	-0.13	0.376703	4.15806	-0.3	0.0356654	-0.13	0.028642	0.694836	0.452203	0.195073	0.854899	0.995558	0.624433	4	0.624433	2.95095e-05	0	0	0.51379	0.00473366
2010-09-26	EGX30	6634.27	6741.5	6781.26	6633.75	462280000	-0.0128	-0.0128723	0.0178718	0.0601863	2.78451e-05	0.314657	0.218094	0.340547	0.858803	0.954738	0.593046	4	63.9471	0.376703	0	22.918	0.79	79.82	0.0490744	0.0411111	2.54	-0.08	0.376703	4.15806	0.79	0.0411111	-0.08	-0.0128723	0.593046	0.166649	0.229781	0.80822	0.922441	0.531773	4	0.531773	3.16013e-05	0	0	0.624433	0.028642
2010-10-03	EGX30	6879.23	6637.87	6947.67	6637.87	435460000	0.0369	0.0362581	0.0224918	0.0601863	8.32639e-05	0.298002	0.682632	0.392085	0.874496	0.888905	0.70953	4	69.0042	0.0761117	0	21.81	-1.79	83.866	0.0142885	0.0269365	2.41	-0.13	0.0761117	4.23417	-1.79	0.0269365	-0.13	0.0362581	0.70953	0.525908	0.269781	0.827815	0.858891	0.620599	4	0.620599	6.48892e-05	0	0	0.531773	-0.0128723
2010-10-10	EGX30	6879.45	6870.37	6930.24	6780.9	466310000	0	3.19798e-05	0.0232605	0.0601863	6.85806e-08	0.256296	0	0.40066	0.856445	0.724045	0.495287	4	69.0042	0.0761117	0	19.174	-1.68	83.114	-0.0233999	0.0255146	2.59	0.18	0.0761117	4.23417	-1.68	0.0255146	0.18	3.19798e-05	0.495287	0	0.276436	0.805275	0.699747	0.445365	4	0.445365	6.93347e-05	0	0	0.620599	0.0362581
2010-10-17	EGX30	6806.73	6865.52	6891.36	6729.76	509440000	-0.0106	-0.0106269	0.0227477	0.0549387	2.08599e-05	0.251643	0.159542	0.366636	0.831208	0.705652	0.51576	4	69.0042	0.0761117	0	19.512	-0.25	81.426	-0.0146293	0.0184934	2.59	0	0.0761117	4.23417	-0.25	0.0184934	0	-0.0106269	0.51576	0.121366	0.243156	0.773764	0.681993	0.45507	4	0.45507	7.11789e-05	0	0	0.445365	3.19798e-05
2010-10-24	EGX30	6697.52	6821.53	6868.53	6691.07	362560000	-0.016	-0.0161745	0.0235704	0.0549387	4.4612e-05	0.255414	0.358639	0.375813	0.917152	0.720558	0.593041	4	69.0042	0.0761117	0	20.572	2.42	82.248	0.0210766	0.0318506	2.63	0.04	0.0761117	4.23417	2.42	0.0318506	0.04	-0.0161745	0.593041	0.275342	0.250279	0.881077	0.696382	0.52577	4	0.52577	8.13084e-05	0	0	0.45507	-0.0106269
2010-10-31	EGX30	6764.61	6714.03	6802.68	6611.99	325620000	0.01	0.0099673	0.0115948	0.0549387	3.06102e-05	0.266083	0.241272	0.242222	0.938766	0.762734	0.546248	4	69.0042	0.0761117	0	19.948	-2.94	85.596	0.0540481	0.028058	2.58	-0.05	0.0761117	4.23417	-2.94	0.028058	-0.05	0.0099673	0.546248	0.184574	0.146595	0.908065	0.737095	0.494082	4	0.494082	0.000159517	0	0	0.52577	-0.0161745
2010-11-07	EGX30	6762.94	6779.68	6854.34	6762.92	290580000	-0.0002	-0.000246904	0.0115616	0.0549387	8.49692e-07	0.299139	0	0.241852	0.959269	0.893398	0.52363	4	79.5157	0.141787	0	19.018	2.35	87.43	-0.0113217	0.024838	2.76	0.18	0.141787	4.37596	2.35	0.024838	0.18	-0.000246904	0.52363	0	0.146308	0.933666	0.863228	0.485801	4	0.485801	0.000767463	0	0	0.494082	0.0099673
2010-11-14	EGX30	6825.41	6757.14	6825.71	6724.19	83660000	0.0092	0.00919471	0.0121613	0.0549387	0.000109906	0.218235	0.905951	0.248541	1	0.573596	0.682022	4	79.5157	0.141787	0	20.266	-2.57	83.94	-0.0342742	0.0217974	2.88	0.12	0.141787	4.37596	-2.57	0.0217974	0.12	0.00919471	0.682022	0.698617	0.151499	1	0.554516	0.601158	4	0.601158	0.00105812	0	0	0.485801	-0.000246904
2010-11-21	EGX30	6837.61	6858.88	7008.9	6827.68	445760000	0.0018	0.00178584	0.00516422	0.0549387	4.00629e-06	0.208363	0.0182694	0.172598	0.868469	0.534573	0.398477	4	79.5157	0.141787	0	20.195	4.18	83.505	0.019173	0.0279194	2.87	-0.01	0.141787	4.37596	4.18	0.0279194	-0.01	0.00178584	0.398477	0.0121101	0.111925	0.820289	0.516847	0.365293	4	0.365293	0.00108288	0	0	0.601158	0.00919471
2010-11-28	EGX30	6689.76	6829.15	6852.93	6682.02	311570000	-0.0216	-0.0218603	0.0133506	0.0549387	7.01616e-05	0.176361	0.572804	0.261808	0.946987	0.408076	0.547419	4	79.5157	0.141787	0	20.766	-4.21	88.1	0.0669463	0.0361408	3.03	0.16	0.141787	4.37596	-4.21	0.0361408	0.16	-0.0218603	0.547419	0.440971	0.161796	0.918331	0.394735	0.478958	4	0.478958	0.000846127	0	0	0.365293	0.00178584
2010-12-05	EGX30	6873.33	6704.21	6873.33	6704.21	191310000	0.0274	0.0270707	0.0202722	0.0549387	0.000141502	0.216988	1	0.339021	1	0.568669	0.726923	4	72.6512	-0.0902847	0	17.722	-0.4	90.248	-0.0123205	0.0150438	3.32	0.29	-0.0902847	4.28567	-0.4	0.0150438	0.29	0.0270707	0.726923	0.903443	0.221723	1	0.54976	0.668731	4	0.668731	0.000305994	0	0	0.478958	-0.0218603
2010-12-12	EGX30	6904.4	6893.39	7009.23	6892.46	292620000	0.0045	0.00451018	0.0200094	0.0549387	1.54131e-05	0.195533	0.113885	0.336089	0.958076	0.483858	0.472977	4	72.6512	-0.0902847	0	17.32	-1.5	90.912	0.0173821	0.0128062	3.33	0.01	-0.0902847	4.28567	-1.5	0.0128062	0.01	0.00451018	0.472977	0.0860563	0.219448	0.932176	0.46789	0.426392	4	0.426392	0.000184518	0	0	0.668731	0.0270707
2010-12-19	EGX30	6951.31	6901.01	6967.43	6877.05	220970000	0.0068	0.00677124	0.0200739	0.0549387	3.06433e-05	0.159695	0.241549	0.336809	1	0.342196	0.480139	4	72.6512	-0.0902847	0	16.205	0.36	92.9	0.0272833	0.0202199	3.41	0.08	-0.0902847	4.28567	0.36	0.0202199	0.08	0.00677124	0.480139	0.184788	0.220007	0.984524	0.331141	0.430115	4	0.430115	0.000152343	0	0	0.426392	0.00451018
2010-12-26	EGX30	7142.14	6951.92	7148.77	6922.61	208890000	0.0275	0.0270823	0.0124103	0.0549387	0.000129649	0.0549753	1	0.25132	1	0	0.56283	4	72.6512	-0.0902847	0	17.548	1.28	93.17	-0.00428129	0.01546	3.3	-0.11	-0.0902847	4.28567	1.28	0.01546	-0.11	0.0270823	0.56283	0.826604	0.153656	0.99335	0	0.493402	4	0.493402	0.000122234	0	0	0.430115	0.00677124
2011-01-02	EGX30	7202.58	7133.25	7247.95	7064.18	290440000	0.0085	0.00842684	0.0103813	0.0549387	2.90141e-05	0.0430615	0.227892	0.228685	0.959351	0	0.353982	4	55.9192	-0.261762	0	17.31	-0.61	94.722	0.0108813	0.0408378	3.34	0.04	-0.261762	4.02391	-0.61	0.0408378	0.04	0.00842684	0.353982	0.174226	0.136089	0.933768	0	0.311021	4	0.311021	1.25596e-05	0	0	0.493402	0.0270823
2011-01-09	EGX30	7156.28	7207.79	7217.12	7128.96	221540000	-0.0064	-0.006449	0.0137953	0.0549387	2.91099e-05	0.0312944	0.228696	0.266769	0.999666	0	0.373783	4	55.9192	-0.261762	0	16.504	-1.68	97.086	0.0375871	0.0228668	3.35	0.01	-0.261762	4.02391	-1.68	0.0228668	0.01	-0.006449	0.373783	0.174847	0.165647	0.984108	0	0.33115	4	0.33115	1.00271e-05	0	0	0.311021	0.00842684
2011-01-16	EGX30	6698.39	7160.02	7161.64	6613.73	387930000	-0.064	-0.0661231	0.0403109	0.0621652	0.000170451	0.120395	1	0.601536	0.902307	0.186848	0.672673	4	55.9192	-0.261762	0	17.41	3.01	97.34	-0.0104778	0.023642	3.44	0.09	-0.261762	4.02391	3.01	0.023642	0.09	-0.0661231	0.672673	1	0.434933	0.862541	0.181179	0.619663	4	0.619663	9.98547e-06	0	0	0.33115	-0.006449
2011-01-23	EGX30	5646.5	6706.19	6733.29	5628.33	316200000	-0.157	-0.170831	0.081373	0.103764	0.000540263	0.226571	1	0.935942	0.944278	0.606548	0.871692	4	55.9192	-0.261762	0	17.614	1.57	96.62	0.00226921	0.0106435	3.36	-0.08	-0.261762	4.02391	1.57	0.0106435	-0.08	-0.170831	0.871692	1	0.880263	0.914948	0.586325	0.845384	4	0.845384	1.07138e-05	0	0	0.619663	-0.0661231
2011-01-30	EGX30																		55.9192	-0.261762	0	17.416	-4.11	100.358	0.0241245	0.0344251	3.68	0.32	-0.261762	4.02391	-4.11	0.0344251	0.32								0		4.23116e-05	0	0	0.845384	-0.170831
2011-02-06	EGX30																		71.9399	0.251923	0	15.948	-0.24	99.904	0.00501606	0.0136192	3.64	-0.04	0.251923	4.27583	-0.24	0.0136192	-0.04								0		0.00141051	0	0
2011-02-13	EGX30																		71.9399	0.251923	0	16.412	0.74	102.806	0.0224617	0.0349963	3.59	-0.05	0.251923	4.27583	0.74	0.0349963	-0.05								0		0.00781028	0	0
2011-02-20	EGX30																		71.9399	0.251923	0	20.8675	2.79	110.493	0.0868238	0.0673529	3.42	-0.17	0.251923	4.27583	2.79	0.0673529	-0.17								0		0.0397493	0	0
2011-02-27	EGX30																		71.9399	0.251923	0	19.544	-0.16	114.526	0.0373316	0.040916	3.49	0.07	0.251923	4.27583	-0.16	0.040916	0.07								0		0.199575	0	0
2011-03-06	EGX30																		124.378	0.547494	0	20.532	1.02	114.446	-0.0142748	0.0466255	3.4	-0.09	0.547494	4.82333	1.02	0.0466255	-0.09								0		0.999437	1	0.547494
2011-03-13	EGX30																		124.378	0.547494	0	25.132	4.36	112.666	0.000525855	0.0344596	3.28	-0.12	0.547494	4.82333	4.36	0.0344596	-0.12								0		0.999999	1	0.547494
2011-03-20	EGX30	4950.82	5085.63	5158.01	4794.88	150560000	-0.1232	-0.131483	0.0724569	0.12555	0.000873291	0.204079	1	1	1	0.517641	0.87941	4	124.378	0.547494	0	19.18	-6.53	115.412	0.0114994	0.00948604	3.46	0.18	0.547494	4.82333	-6.53	0.00948604	0.18	-0.131483	0.87941	1	1	1	0.500501	0.875125	4	0.875125	0.999999	1	0.547494
2011-03-27	EGX30	5463.72	5081.83	5605.4	5081.82	489050000	0.1036	0.0985767	0.11882	0.12555	0.000201568	0.197108	1	1	0.843139	0.490085	0.833306	4	124.378	0.547494	0	18.09	-0.51	116.49	0.0271719	0.0206434	3.46	0	0.547494	4.82333	-0.51	0.0206434	0	0.0985767	0.833306	1	1	0.788661	0.473901	0.81564	4	0.81564	0.999336	1	0.547494	0.875125	-0.131483
2011-04-03	EGX30	5425.98	5512.34	5619.29	5413.14	258750000	-0.0069	-0.00693135	0.122666	0.12555	2.67878e-05	0.215477	0.209231	1	0.977894	0.562695	0.687455	4	63.0888	-0.678782	0	17.326	0.47	123.03	0.0626506	0.0377327	3.59	0.13	-0.678782	4.14454	0.47	0.0377327	0.13	-0.00693135	0.687455	0.159794	1	0.956922	0.543993	0.665177	4	0.665177	0.0557848	0	0	0.81564	0.0985767
2011-04-10	EGX30	5300.06	5408.28	5408.28	5199.9	251220000	-0.0232	-0.0234804	0.0941668	0.12555	9.34654e-05	0.229324	0.768144	1	0.9823	0.61743	0.841969	4	63.0888	-0.678782	0	16.438	-2.55	123.572	-0.0133107	0.0455658	3.43	-0.16	-0.678782	4.14454	-2.55	0.0455658	-0.16	-0.0234804	0.841969	0.592041	1	0.962423	0.59683	0.787823	4	0.787823	0.00313942	0	0	0.665177	-0.00693135
2011-04-17	EGX30	4996.07	5274.77	5278.43	4953.01	212860000	-0.0574	-0.0590665	0.0677862	0.12555	0.00027749	0.220966	1	1	1	0.58439	0.896098	4	63.0888	-0.678782	0	15.6375	-0.63	122.735	-0.00797523	0.0341219	3.42	-0.01	-0.678782	4.14454	-0.63	0.0341219	-0.01	-0.0590665	0.896098	1	1	0.990449	0.564936	0.888846	4	0.888846	0.000202449	0	0	0.787823	-0.0234804
2011-04-24	EGX30	5003.65	5008.94	5020.37	4945.41	118690000	0.0015	0.00151604	0.0268091	0.12555	1.27731e-05	0.206958	0.0917558	0.739345	1	0.52902	0.59003	4	63.0888	-0.678782	0	15.222	0.06	125.36	0.0235794	0.0153519	3.32	-0.1	-0.678782	4.14454	0.06	0.0153519	-0.1	0.00151604	0.59003	0.0689423	0.666394	1	0.511485	0.561706	4	0.561706	4.53395e-05	0	0	0.888846	-0.0590665
2011-05-01	EGX30	4937.06	5029.09	5070.01	4935.32	153760000	-0.0133	-0.0133976	0.0257733	0.12555	8.71334e-05	0.182284	0.715067	0.72779	1	0.431488	0.718586	4	73.6942	0.155381	0	17.274	3.65	119.564	-0.107478	0.0887907	3.19	-0.13	0.155381	4.29992	3.65	0.0887907	-0.13	-0.0133976	0.718586	0.550993	0.657427	1	0.417336	0.656439	4	0.656439	0.000157711	0	0	0.561706	0.00151604
2011-05-08	EGX30	5005.09	4916.85	5005.27	4850.41	195300000	0.0138	0.0136854	0.0318234	0.12555	7.00736e-05	0.184808	0.572067	0.795281	1	0.441465	0.702203	4	73.6942	0.155381	0	16.624	-1.33	114.528	-0.00537991	0.0505278	3.18	-0.01	0.155381	4.29992	-1.33	0.0505278	-0.01	0.0136854	0.702203	0.4404	0.709808	1	0.426967	0.644294	4	0.644294	0.000186538	0	0	0.656439	-0.0133976
2011-05-15	EGX30	5249.11	5015.71	5252.3	5008.96	335420000	0.0488	0.0476031	0.02598	0.12555	0.000141921	0.143622	1	0.730096	0.933032	0.278665	0.735448	4	73.6942	0.155381	0	16.994	0.36	112.02	-0.0163156	0.0517775	3.15	-0.03	0.155381	4.29992	0.36	0.0517775	-0.03	0.0476031	0.735448	0.90616	0.659216	0.900905	0.269812	0.684023	4	0.684023	0.000191865	0	0	0.644294	0.0136854
2011-05-22	EGX30	5411.83	5321.71	5424.87	5260.84	315580000	0.031	0.0305288	0.0259964	0.12555	9.67386e-05	0.172055	0.795581	0.730279	0.944641	0.391055	0.715389	4	73.6942	0.155381	0	17.046	-1.45	113.406	0.031847	0.0298044	3.07	-0.08	0.155381	4.29992	-1.45	0.0298044	-0.08	0.0305288	0.715389	0.613259	0.659358	0.915401	0.378305	0.641581	4	0.641581	0.000184789	0	0	0.684023	0.0476031
2011-05-29	EGX30	5361.88	5432.83	5599.04	5323.9	420000000	-0.0092	-0.00927264	0.0242757	0.12555	2.20777e-05	0.169789	0.16975	0.711084	0.883542	0.382098	0.536619	4	73.6942	0.155381	0	17.4475	1.97	115.68	0.0020875	0.0280457	2.99	-0.08	0.155381	4.29992	1.97	0.0280457	-0.08	-0.00927264	0.536619	0.12926	0.64446	0.83911	0.369659	0.495622	4	0.495622	0.000150569	0	0	0.641581	0.0305288
2011-06-05	EGX30	5504.6	5407.32	5512.02	5397.25	328530000	0.0266	0.0262694	0.023887	0.12555	7.99606e-05	0.12565	0.654942	0.706747	0.937064	0.207621	0.626594	4	58.5139	-0.23066	0	18.396	0.91	117.726	0.0309691	0.0264569	2.99	0	-0.23066	4.06926	0.91	0.0264569	0	0.0262694	0.626594	0.504494	0.641095	0.905939	0.201232	0.56319	4	0.56319	1.79291e-05	0	0	0.495622	-0.00927264
2011-06-12	EGX30	5541.64	5515.89	5616.95	5496.5	438960000	0.0067	0.00670638	0.0184189	0.12555	1.52779e-05	0.115608	0.112751	0.64575	0.872448	0.167929	0.44972	4	58.5139	-0.23066	0	20.754	2.99	116.788	-0.0427684	0.0512775	2.94	-0.05	-0.23066	4.06926	2.99	0.0512775	-0.05	0.00670638	0.44972	0.0851797	0.593753	0.825258	0.162916	0.416777	4	0.416777	1.37978e-05	0	0	0.56319	0.0262694
2011-06-19	EGX30	5479.6	5556.03	5666.55	5461.49	489740000	-0.0112	-0.0112584	0.0174076	0.12555	2.29885e-05	0.113372	0.177384	0.634468	0.842735	0.159089	0.453419	4	58.5139	-0.23066	0	19.552	-0.75	110.176	-0.0819568	0.0612224	2.88	-0.06	-0.23066	4.06926	-0.75	0.0612224	-0.06	-0.0112584	0.453419	0.135165	0.584997	0.788157	0.154383	0.415675	4	0.415675	1.36598e-05	0	0	0.416777	0.00670638
2011-06-26	EGX30	5373	5489.81	5508.78	5269.96	317910000	-0.0195	-0.0196457	0.0203854	0.12555	6.17964e-05	0.104778	0.502684	0.667686	0.943278	0.125119	0.559692	4	58.5139	-0.23066	0	17.878	-5.23	109.032	0.0468843	0.048792	3.22	0.34	-0.23066	4.06926	-5.23	0.048792	0.34	-0.0196457	0.559692	0.386742	0.610778	0.913698	0.12159	0.508202	4	0.508202	1.33553e-05	0	0	0.415675	-0.0112584
2011-07-03	EGX30	5360.34	5392.54	5457.22	5291.72	302980000	-0.0024	-0.00235901	0.0113568	0.122812	7.78601e-06	0.136379	0.0499522	0.566969	0.952014	0.250031	0.454742	4	41.8878	-0.33427	0	16.075	0.08	115.39	0.0667442	0.0452224	3.03	-0.19	-0.33427	3.73499	0.08	0.0452224	-0.19	-0.00235901	0.454742	0.0366126	0.517562	0.924606	0.242171	0.430238	4	0.430238	3.7068e-06	0	0	0.508202	-0.0196457
2011-07-10	EGX30	5097.32	5362	5376.24	4939.48	312780000	-0.0491	-0.0503125	0.0208438	0.122812	0.000160856	0.140465	1	0.6728	0.946279	0.266184	0.721316	4	41.8878	-0.33427	0	19.7	3.58	117.722	0.00560606	0.0142994	2.94	-0.09	-0.33427	3.73499	3.58	0.0142994	-0.09	-0.0503125	0.721316	1	0.5997	0.917446	0.257764	0.693728	4	0.693728	3.6234e-06	0	0	0.430238	-0.00235901
2011-07-17	EGX30	5136.78	5113.6	5263.83	5113.6	239590000	0.0077	0.00771151	0.0254222	0.122812	3.21863e-05	0.160339	0.254483	0.723873	0.989105	0.344742	0.578051	4	41.8878	-0.33427	0	18.866	-2.01	118.198	0.00784649	0.0147817	2.99	0.05	-0.33427	3.73499	-2.01	0.0147817	0.05	0.00771151	0.578051	0.194791	0.639339	0.97092	0.333598	0.534662	4	0.534662	3.62268e-06	0	0	0.693728	-0.0503125
2011-07-24	EGX30	5022.25	5116.63	5116.63	5022.2	144080000	-0.0223	-0.0225484	0.025596	0.122812	0.000156499	0.171231	1	0.725812	1	0.387795	0.778402	4	41.8878	-0.33427	0	22.31	7.73	117.698	-0.0260529	0.0201185	2.82	-0.17	-0.33427	3.73499	7.73	0.0201185	-0.17	-0.0225484	0.778402	1	0.640844	1	0.375158	0.754	4	0.754	3.62267e-06	0	0	0.534662	0.00771151
2011-07-31	EGX30	5007.5	5020.63	5083.33	4904.97	199590000	-0.0029	-0.00294125	0.0254873	0.122812	1.47365e-05	0.162611	0.108213	0.7246	1	0.353724	0.546634	4	41.8878	-0.33427	0	27.098	6.75	112.654	-0.0809057	0.0482662	2.58	-0.24	-0.33427	3.73499	6.75	0.0482662	-0.24	-0.00294125	0.546634	0.0816699	0.639903	1	0.342268	0.51596	4	0.51596	3.62233e-06	0	0	0.754	-0.0225484
2011-08-07	EGX30	4592.31	4859.07	4859.07	4417.83	241350000	-0.0829	-0.0865536	0.0422169	0.129623	0.000358623	0.191154	1	0.911223	0.988075	0.466549	0.841462	4	40.4325	-0.035361	0	40.282	4.36	105.304	0.0116232	0.0530253	2.24	-0.34	-0.035361	3.69963	4.36	0.0530253	-0.34	-0.0865536	0.841462	1	0.799794	0.969634	0.451181	0.805152	4	0.805152	3.58352e-06	0	0	0.51596	-0.00294125
2011-08-14	EGX30	4747.17	4619.26	4771.54	4608.59	148870000	0.0337	0.0331655	0.0501768	0.129623	0.000222782	0.202261	1	1	1	0.510454	0.877614	4	40.4325	-0.035361	0	36.404	6.69	109.536	0.0110326	0.034138	2.07	-0.17	-0.035361	3.69963	6.69	0.034138	-0.17	0.0331655	0.877614	1	0.86871	1	0.493564	0.840568	4	0.840568	3.58319e-06	0	0	0.805152	-0.0865536
2011-08-21	EGX30	4676.05	4603.27	4679.33	4540.76	162990000	-0.015	-0.0150949	0.0501751	0.129623	9.26125e-05	0.195549	0.760995	1	1	0.483922	0.811229	4	40.4325	-0.035361	0	37.992	-7.46	111.058	0.0263482	0.020626	2.19	0.12	-0.035361	3.69963	-7.46	0.020626	0.12	-0.0150949	0.811229	0.586512	0.868696	1	0.467952	0.73079	4	0.73079	3.58322e-06	0	0	0.840568	0.0331655
2011-08-28	EGX30	4639.64	4665.3	4673.46	4637.99	38640000	-0.0078	-0.00781696	0.0497494	0.129623	0.000202302	0.184197	1	0.995251	1	0.439051	0.858575	4	40.4325	-0.035361	0	32.506	-1.67	116.105	0.0318155	0.0302859	2.02	-0.17	-0.035361	3.69963	-1.67	0.0302859	-0.17	-0.00781696	0.858575	1	0.86501	1	0.424636	0.822412	4	0.822412	3.58704e-06	0	0	0.73079	-0.0150949
2011-09-04	EGX30	4754.56	4653.62	4756.09	4637.18	178110000	0.0248	0.0244674	0.0237078	0.129623	0.000137372	0.203472	1	0.704748	1	0.515242	0.804998	4	45.2503	0.112576	0	35.805	4.6	115.97	-0.00709898	0.0499028	1.93	-0.09	0.112576	3.81221	4.6	0.0499028	-0.09	0.0244674	0.804998	0.876673	0.639543	1	0.498185	0.7536	4	0.7536	4.03349e-06	0	0	0.822412	-0.00781696
2011-09-11	EGX30	4364.6	4701.47	4704.51	4364.6	224660000	-0.082	-0.0855776	0.0463545	0.129623	0.000380921	0.210821	1	0.95738	0.997841	0.544291	0.874878	4	45.2503	0.112576	0	34.61	-7.54	114.98	0.0100277	0.0334684	2.08	0.15	0.112576	3.81221	-7.54	0.0334684	0.15	-0.0855776	0.874878	1	0.835617	0.981828	0.526227	0.835918	4	0.835918	4.03778e-06	0	0	0.7536	0.0244674
2011-09-18	EGX30	4335.16	4386.76	4501.62	4311.27	216370000	-0.0067	-0.00676803	0.0468923	0.129623	3.12799e-05	0.22743	0.246885	0.963379	1	0.609943	0.705052	4	45.2503	0.112576	0	37.102	10.27	111.984	-0.0629228	0.0555365	1.84	-0.24	0.112576	3.81221	10.27	0.0555365	-0.24	-0.00676803	0.705052	0.188915	0.840273	0.987885	0.589603	0.651669	4	0.651669	4.03791e-06	0	0	0.835918	-0.0855776
2011-09-25	EGX30	4137.35	4339.28	4360.57	4082.42	201390000	-0.0456	-0.046703	0.0478433	0.129623	0.000231903	0.249996	1	0.973988	1	0.699143	0.918283	4	45.2503	0.112576	0	39.922	1.71	107.692	-0.0349539	0.0295727	1.92	0.08	0.112576	3.81221	1.71	0.0295727	0.08	-0.046703	0.918283	1	0.848507	0.99883	0.675709	0.880761	4	0.880761	4.04688e-06	0	0	0.651669	-0.00676803
2011-10-02	EGX30	3951.99	4178.39	4232.53	3951.34	124530000	-0.0448	-0.0458362	0.0321759	0.129623	0.000368074	0.256591	1	0.799213	1	0.725213	0.881107	4	48.7039	0.0735491	0	39.31	-6.76	104.032	0.0107558	0.037562	2.1	0.18	0.0735491	3.88576	-6.76	0.037562	0.18	-0.0458362	0.881107	1	0.712859	1	0.700876	0.853434	4	0.853434	4.97941e-06	0	0	0.880761	-0.046703
2011-10-09	EGX30	4152.29	3952.41	4152.29	3820.3	161050000	0.0507	0.0494407	0.0452793	0.129623	0.00030699	0.177414	1	0.945386	1	0.412236	0.839406	4	48.7039	0.0735491	0	31.216	-7.96	111.586	0.0703808	0.0431393	2.26	0.16	0.0735491	3.88576	-7.96	0.0431393	0.16	0.0494407	0.839406	1	0.826308	1	0.398752	0.806265	4	0.806265	4.99044e-06	0	0	0.853434	-0.0458362
2011-10-16	EGX30	4264.89	4169.16	4270.59	4169.04	174860000	0.0271	0.0267564	0.0495838	0.129623	0.000153016	0.212972	1	0.993404	1	0.552793	0.886549	4	48.7039	0.0735491	0	33.098	3.08	111.472	-0.024168	0.0374019	2.23	-0.03	0.0735491	3.88576	3.08	0.0374019	-0.03	0.0267564	0.886549	0.978086	0.863576	1	0.534434	0.844024	4	0.844024	4.9906e-06	0	0	0.806265	0.0494407
2011-10-23	EGX30	4339.78	4267.69	4361.04	4267.69	196750000	0.0176	0.0174073	0.0407996	0.129623	8.8474e-05	0.207542	0.726305	0.895413	1	0.531328	0.788262	4	48.7039	0.0735491	0	28.266	-6.79	111.334	-0.0143498	0.0324601	2.34	0.11	0.0735491	3.88576	-6.79	0.0324601	0.11	0.0174073	0.788262	0.559683	0.787523	1	0.513714	0.71523	4	0.71523	4.9933e-06	0	0	0.844024	0.0267564
2011-10-30	EGX30	4424.02	4382.22	4469.08	4370.8	172410000	0.0194	0.0192251	0.0147228	0.129623	0.000111508	0.221465	0.919385	0.604518	1	0.586363	0.777567	4	48.7039	0.0735491	0	31.626	5.63	109.84	0.01989	0.0426039	2.06	-0.28	0.0735491	3.88576	5.63	0.0426039	-0.28	0.0192251	0.777567	0.709005	0.561752	1	0.56684	0.709399	4	0.709399	5.22102e-06	0	0	0.71523	0.0174073
2011-11-06	EGX30	4383.49	4426.26	4451.92	4362.83	46320000	-0.0092	-0.00920357	0.0156973	0.129623	0.000198695	0.226227	1	0.615389	1	0.605188	0.805144	4	63.0422	0.258045	0	31.268	-0.12	114.68	0.0195021	0.0308633	2.04	-0.02	0.258045	4.1438	-0.12	0.0308633	-0.02	-0.00920357	0.805144	1	0.570189	1	0.585012	0.7888	4	0.7888	2.4467e-05	0	0	0.709399	0.0192251
2011-11-13	EGX30	4124.71	4389.85	4392.14	4123.16	219560000	-0.059	-0.0608495	0.0373307	0.129623	0.000277143	0.159479	1	0.856717	1	0.341344	0.799515	4	63.0422	0.258045	0	32.474	1.96	110.69	-0.0595001	0.032504	2.01	-0.03	0.258045	4.1438	1.96	0.032504	-0.03	-0.0608495	0.799515	1	0.75749	0.985554	0.330317	0.76834	4	0.76834	2.55307e-05	0	0	0.7888	-0.00920357
2011-11-20	EGX30	3780.13	4036.49	4037.56	3598.71	179020000	-0.0835	-0.0872373	0.0483109	0.12985	0.000487305	0.132811	1	0.979204	1	0.235927	0.803783	4	63.0422	0.258045	0	33.3325	2.47	106.665	-0.0162696	0.0265177	1.97	-0.04	0.258045	4.1438	2.47	0.0265177	-0.04	-0.0872373	0.803783	1	0.852555	1	0.228556	0.770278	4	0.770278	2.55279e-05	0	0	0.76834	-0.0608495
2011-11-27	EGX30	4087.89	3929.87	4087.89	3929.87	131710000	0.0814	0.0782705	0.0729451	0.12985	0.000594264	0.131635	1	1	1	0.23128	0.80782	4	63.0422	0.258045	0	29.1	-6.95	110.054	0.0325526	0.041788	2.05	0.08	0.258045	4.1438	-6.95	0.041788	0.08	0.0782705	0.80782	1	1	1	0.22407	0.806018	4	0.806018	2.44123e-05	0	0	0.770278	-0.0872373
2011-12-04	EGX30	3970.05	4096.37	4113.72	3955.37	128240000	-0.0288	-0.0292503	0.0726666	0.12985	0.00022809	0.13526	1	1	1	0.245608	0.811402	4	45.2549	-0.331494	0	28.322	-1.14	109.31	-0.0154486	0.0179579	2.07	0.02	-0.331494	3.81231	-1.14	0.0179579	0.02	-0.0292503	0.811402	1	1	1	0.237902	0.809475	4	0.809475	4.23466e-06	0	0	0.806018	0.0782705
2011-12-11	EGX30	3918.45	3978.71	4028.6	3862.71	93570000	-0.013	-0.0130825	0.0685698	0.12985	0.000139815	0.135784	1	1	1	0.24768	0.81192	4	45.2549	-0.331494	0	25.304	-2.09	106.262	-0.0369066	0.0375268	1.86	-0.21	-0.331494	3.81231	-2.09	0.0375268	-0.21	-0.0130825	0.81192	0.89251	1	1	0.239902	0.783103	4	0.783103	4.0406e-06	0	0	0.809475	-0.0292503
2011-12-18	EGX30	3614.04	3858.8	3858.8	3613.45	125670000	-0.0777	-0.0808699	0.0663029	0.12985	0.00064351	0.14272	1	1	1	0.275099	0.818775	4	45.2549	-0.331494	0	22.292	-3.56	107.722	0.0495225	0.0325195	2.03	0.17	-0.331494	3.81231	-3.56	0.0325195	0.17	-0.0808699	0.818775	1	1	1	0.266369	0.816592	4	0.816592	4.03949e-06	0	0	0.783103	-0.0130825
2011-12-25	EGX30	3622.35	3648.54	3702.07	3578.12	100730000	0.0023	0.00229673	0.0361358	0.12985	2.28008e-05	0.1493	0.175811	0.843387	1	0.301109	0.580077	4	45.2549	-0.331494	0	22.87	2.67	107.507	-0.0109492	0.0204697	1.89	-0.14	-0.331494	3.81231	2.67	0.0204697	-0.14	0.00229673	0.580077	0.133948	0.747144	1	0.291478	0.543142	4	0.543142	4.11826e-06	0	0	0.816592	-0.0808699
2012-01-01	EGX30	3627.8	3661.69	3682.17	3621.07	61510000	0.0015	0.00150342	0.0395254	0.12985	2.44418e-05	0.142026	0.189567	0.881199	1	0.272356	0.58578	4	57.8409	0.245385	0	21.825	-2.77	112.51	0.0351775	0.0371328	1.98	0.09	0.245385	4.0577	-2.77	0.0371328	0.09	0.00150342	0.58578	0.144586	0.776491	1	0.263722	0.5462	4	0.5462	1.23099e-05	0	0	0.543142	0.00229673
2012-01-08	EGX30	3777.88	3640.97	3777.88	3627.4	140620000	0.0414	0.0405366	0.0511762	0.12985	0.000288271	0.149388	1	1	1	0.301453	0.825363	4	57.8409	0.245385	0	20.838	0.28	111.776	-0.0187528	0.0397069	1.89	-0.09	0.245385	4.0577	0.28	0.0397069	-0.09	0.0405366	0.825363	1	0.877363	1	0.29181	0.792293	4	0.792293	1.25455e-05	0	0	0.5462	0.00150342
2012-01-15	EGX30	3868.44	3785.99	3913.8	3785.99	214930000	0.024	0.0236883	0.0187531	0.12985	0.000110214	0.149599	0.908537	0.649477	1	0.302288	0.715076	4	57.8409	0.245385	0	20.31	-2.63	109.6	-0.0126387	0.0133839	2.05	0.16	0.245385	4.0577	-2.63	0.0133839	0.16	0.0236883	0.715076	0.700616	0.596646	0.988937	0.292616	0.644704	4	0.644704	1.25539e-05	0	0	0.792293	0.0405366
2012-01-22	EGX30	4432.99	3948.91	4432.99	3917.34	426600000	0.1459	0.136223	0.0593499	0.12985	0.000319322	0.133056	1	1	0.87968	0.236897	0.779144	4	57.8409	0.245385	0	18.598	0.25	109.18	0.0182653	0.0193515	1.93	-0.12	0.245385	4.0577	0.25	0.0193515	-0.12	0.136223	0.779144	1	0.94813	0.834288	0.229492	0.752978	4	0.752978	1.26092e-05	0	0	0.644704	0.0236883
2012-01-29	EGX30	4584.39	4532.71	4712.61	4421.84	639890000	0.0342	0.0335828	0.0522694	0.12985	5.24821e-05	0.137668	0.424609	1	0.754878	0.255127	0.608653	4	57.8409	0.245385	0	18.494	-1.43	111.196	0.0184709	0.0229161	1.97	0.04	0.245385	4.0577	-1.43	0.0229161	0.04	0.0335828	0.608653	0.326361	0.886828	0.678455	0.24709	0.534683	4	0.534683	1.45293e-05	0	0	0.752978	0.136223
2012-02-05	EGX30	4753.65	4480.83	4781.65	4477.15	448430000	0.0369	0.0362557	0.0528011	0.12985	8.08503e-05	0.110075	0.6624	1	0.866907	0.146056	0.668841	4	70.4941	0.197834	0	18.598	3.69	117.208	0.0482993	0.0302431	1.96	-0.01	0.197834	4.25553	3.69	0.0302431	-0.01	0.0362557	0.668841	0.510261	0.891431	0.818339	0.141801	0.590458	4	0.590458	8.13151e-05	0	0	0.534683	0.0335828
2012-02-12	EGX30	4967.15	4787.15	5242.78	4739.4	777260000	0.0449	0.0439335	0.0493449	0.12985	5.65235e-05	0.132151	0.458486	0.990739	0.6745	0.23332	0.589261	4	70.4941	0.197834	0	19.344	-3.01	119.794	0.0214396	0.0187447	2.01	0.05	0.197834	4.25553	-3.01	0.0187447	0.05	0.0439335	0.589261	0.35256	0.861508	0.578091	0.226039	0.50455	4	0.50455	9.32294e-05	0	0	0.590458	0.0362557
2012-02-19	EGX30	5141.81	4987.66	5219.23	4982.53	659990000	0.0352	0.0345589	0.00469881	0.12985	5.23628e-05	0.137524	0.423609	0.5	0.743117	0.254559	0.480321	4	70.4941	0.197834	0	17.6225	-0.47	123.335	0.0342081	0.0219209	1.98	-0.03	0.197834	4.25553	-0.47	0.0219209	-0.03	0.0345589	0.480321	0.325588	0.5	0.66377	0.246542	0.433975	4	0.433975	0.000102564	0	0	0.50455	0.0439335
2012-02-26	EGX30	5369.97	5196.13	5399.2	5195.22	678850000	0.0444	0.0434172	0.00482815	0.12985	6.39569e-05	0.151031	0.520795	0.5	0.732082	0.307948	0.515206	4	70.4941	0.197834	0	17.826	-0.02	124.88	0.00829285	0.0394897	1.99	0.01	0.197834	4.25553	-0.02	0.0394897	0.01	0.0434172	0.515206	0.400748	0.5	0.649991	0.298079	0.462205	4	0.462205	0.000150287	0	0	0.433975	0.0345589
2012-03-04	EGX30	5396.85	5424.99	5473.3	5213.53	697460000	0.005	0.00499313	0.0183337	0.12985	7.15902e-06	0.15782	0.0446965	0.644799	0.721193	0.334787	0.436369	4	77.6787	0.0970513	0	18.61	-0.18	126.624	0.0169289	0.0251701	2.04	0.05	0.0970513	4.35258	-0.18	0.0251701	0.05	0.00499313	0.436369	0.0325481	0.593015	0.636394	0.323988	0.396486	4	0.396486	0.000445856	0	0	0.462205	0.0434172
2012-03-11	EGX30	5169.43	5353.24	5382.96	5014.56	639920000	-0.0421	-0.043053	0.0389852	0.101758	6.72788e-05	0.166495	0.548639	0.800296	0.754861	0.369077	0.618218	4	77.6787	0.0970513	0	15.128	-2.64	126.222	-0.0236216	0.0319691	2.31	0.27	0.0970513	4.35258	-2.64	0.0319691	0.27	-0.043053	0.618218	0.422282	0.641053	0.678433	0.357089	0.524714	4	0.524714	0.000556319	0	0	0.396486	0.00499313
2012-03-18	EGX30	5145.32	5128.02	5171.87	4972.96	416090000	-0.0047	-0.00467487	0.0355213	0.0864562	1.12352e-05	0.188573	0.0788647	0.679123	0.88583	0.456346	0.525041	4	77.6787	0.0970513	0	15.228	0.35	124.346	0.000958849	0.0278817	2.25	-0.06	0.0970513	4.35258	0.35	0.0278817	-0.06	-0.00467487	0.525041	0.0589727	0.526966	0.841967	0.441332	0.467309	4	0.467309	0.000540183	0	0	0.524714	-0.043053
2012-03-25	EGX30	5018.55	5140.72	5140.72	4860.91	493950000	-0.0246	-0.0249465	0.0214281	0.0864562	5.05041e-05	0.159263	0.408029	0.521909	0.840272	0.340488	0.527674	4	77.6787	0.0970513	0	15.26	0.68	124.43	-0.0144802	0.0136772	2.23	-0.02	0.0970513	4.35258	0.68	0.0136772	-0.02	-0.0249465	0.527674	0.313539	0.404948	0.785081	0.329491	0.458265	4	0.458265	0.000388902	0	0	0.467309	-0.00467487
2012-04-01	EGX30	4827.02	4973.85	4984.78	4823.02	401250000	-0.0382	-0.0389117	0.0173109	0.0864562	9.69763e-05	0.218768	0.797574	0.47598	0.894513	0.575703	0.685942	4	57.4627	-0.301444	0	16.11	1.2	123.687	0.00137657	0.0147061	2.07	-0.16	-0.301444	4.05114	1.2	0.0147061	-0.16	-0.0389117	0.685942	0.614801	0.369302	0.852809	0.556549	0.598365	4	0.598365	2.23463e-05	0	0	0.458265	-0.0249465
2012-04-08	EGX30	4735.15	4785.01	4831.06	4552.64	467260000	-0.019	-0.0192159	0.0141726	0.0864562	4.11246e-05	0.185174	0.329407	0.440971	0.855889	0.44291	0.517294	4	57.4627	-0.301444	0	19.194	2.85	120.873	-0.0242436	0.0184603	2.02	-0.05	-0.301444	4.05114	2.85	0.0184603	-0.05	-0.0192159	0.517294	0.252735	0.34213	0.804581	0.428362	0.456952	4	0.456952	1.22639e-05	0	0	0.598365	-0.0389117
2012-04-15	EGX30	4707.99	4708.12	4717.96	4667.98	172660000	-0.0057	-0.00575234	0.0137387	0.0864562	3.3316e-05	0.194982	0.263953	0.436131	1	0.48168	0.545441	4	57.4627	-0.301444	0	18.49	-2.11	117.18	-0.0212827	0.033866	1.99	-0.03	-0.301444	4.05114	-2.11	0.033866	-0.03	-0.00575234	0.545441	0.202114	0.338374	1	0.465787	0.501569	4	0.501569	1.19865e-05	0	0	0.456952	-0.0192159
2012-04-22	EGX30	4934.92	4720.13	4962.12	4720.13	459100000	0.0482	0.0470754	0.0367966	0.0864562	0.000102538	0.192853	0.844197	0.693349	0.860664	0.473266	0.717869	4	57.4627	-0.301444	0	17.29	-1.12	118.096	0.010279	0.0221273	1.96	-0.03	-0.301444	4.05114	-1.12	0.0221273	-0.03	0.0470754	0.717869	0.650858	0.538007	0.810543	0.457665	0.614268	4	0.614268	1.19773e-05	0	0	0.501569	-0.00575234
2012-04-29	EGX30	4929.24	4938.26	4983.97	4880	293170000	-0.0012	-0.00115164	0.0289251	0.0864562	3.92825e-06	0.207612	0.0176152	0.60554	0.957754	0.531607	0.528129	4	57.4627	-0.301444	0	17.47	2.84	116.674	-0.0661828	0.0443787	1.91	-0.05	-0.301444	4.05114	2.84	0.0443787	-0.05	-0.00115164	0.528129	0.0116042	0.469856	0.931774	0.513983	0.481804	4	0.481804	1.19186e-05	0	0	0.614268	0.0470754
2012-05-06	EGX30	5014.91	4950.47	5056.91	4950.04	332320000	0.0174	0.0172307	0.0239698	0.0864562	5.18496e-05	0.215611	0.419307	0.550263	0.934846	0.563223	0.61691	4	55.7222	-0.0307579	0	19.358	0.73	111.778	0.00749468	0.0169942	1.84	-0.07	-0.0307579	4.02038	0.73	0.0169942	-0.07	0.0172307	0.61691	0.322261	0.426954	0.90317	0.544502	0.549222	4	0.549222	9.79294e-06	0	0	0.481804	-0.00115164
2012-05-13	EGX30	4890.3	5016.99	5086.37	4890.3	351680000	-0.0248	-0.0251618	0.0304772	0.0864562	7.15475e-05	0.221963	0.584421	0.622854	0.923518	0.588332	0.679781	4	55.7222	-0.0307579	0	23.14	5.21	109.866	-0.0405443	0.0251552	1.71	-0.13	-0.0307579	4.02038	5.21	0.0251552	-0.13	-0.0251618	0.679781	0.449955	0.483294	0.889026	0.568741	0.597754	4	0.597754	9.74483e-06	0	0	0.549222	0.0172307
2012-05-20	EGX30	4971.72	4877.49	4971.76	4777.2	296090000	0.0166	0.0165122	0.0199181	0.0864562	5.57675e-05	0.21232	0.452149	0.505065	0.956045	0.550215	0.615868	4	55.7222	-0.0307579	0	22.024	-3.34	108.144	-0.00157488	0.0297084	1.75	0.04	-0.0307579	4.02038	-3.34	0.0297084	0.04	0.0165122	0.615868	0.347659	0.391875	0.92964	0.531946	0.55028	4	0.55028	9.74077e-06	0	0	0.597754	-0.0251618
2012-05-27	EGX30	4686.42	4963.85	4963.85	4639.04	318520000	-0.0574	-0.0590969	0.0367747	0.0864562	0.000185536	0.104955	1	0.693106	0.942921	0.125819	0.690461	4	55.7222	-0.0307579	0	23.9725	4.9	103.472	-0.0894586	0.062478	1.47	-0.28	-0.0307579	4.02038	4.9	0.062478	-0.28	-0.0590969	0.690461	1	0.537818	0.913253	0.122266	0.643334	4	0.643334	9.60926e-06	0	0	0.55028	0.0165122
2012-06-03	EGX30	4489.55	4605.34	4656.91	4467.23	204610000	-0.042	-0.0429165	0.0325498	0.0864562	0.000209748	0.0731253	1	0.645975	1	0	0.661494	4	43.2724	-0.252865	0	23.182	-5.43	99.03	-0.0108054	0.0392027	1.65	0.18	-0.252865	3.76751	-5.43	0.0392027	0.18	-0.0429165	0.661494	1	0.501239	0.996477	0.000810405	0.624632	4	0.624632	3.79108e-06	0	0	0.643334	-0.0590969
2012-06-10	EGX30	4419.04	4485.45	4500.13	4381.28	330560000	-0.0157	-0.01583	0.0331185	0.0864562	4.78884e-05	0.067817	0.386103	0.652319	0.935876	0	0.493575	4	43.2724	-0.252865	0	22.542	-0.12	97.214	-0.00451978	0.026607	1.6	-0.05	-0.252865	3.76751	-0.12	0.026607	-0.05	-0.01583	0.493575	0.296582	0.506163	0.904456	0	0.4268	4	0.4268	3.73921e-06	0	0	0.624632	-0.0429165
2012-06-17	EGX30	4031.6	4409.95	4413.95	4031.39	244330000	-0.0877	-0.0917592	0.0317348	0.0885167	0.000375554	0.11998	1	0.647997	0.986331	0.185209	0.704884	4	43.2724	-0.252865	0	18.426	-3	92.458	-0.0849451	0.0538238	1.69	0.09	-0.252865	3.76751	-3	0.0538238	0.09	-0.0917592	0.704884	1	0.505507	0.967457	0.179597	0.66314	4	0.66314	3.73922e-06	0	0	0.4268	-0.01583
2012-06-24	EGX30	4708.59	4032.81	4708.61	4027.45	591290000	0.1679	0.155225	0.107396	0.0885167	0.00026252	0.12717	1	0.853705	0.783316	0.213629	0.712662	4	43.2724	-0.252865	0	19.268	-1.03	91.226	0.0539964	0.0449948	1.67	-0.02	-0.252865	3.76751	-1.03	0.0449948	-0.02	0.155225	0.712662	1	0.796467	0.713963	0.207032	0.679365	4	0.679365	3.79204e-06	0	0	0.66314	-0.0917592
2012-07-01	EGX30	4949.57	4837.15	5022.39	4837.15	546630000	0.0512	0.0499122	0.104686	0.0885167	9.13089e-05	0.136379	0.750068	0.853705	0.809447	0.250033	0.665813	4	55.8216	0.254646	0	17.015	0.02	98.8025	0.0449549	0.0596841	1.57	-0.1	0.254646	4.02216	0.02	0.0596841	-0.1	0.0499122	0.665813	0.578061	0.796467	0.746592	0.242173	0.590823	4	0.590823	9.71685e-06	0	0	0.679365	0.155225
2012-07-08	EGX30	4814.84	4953.33	4974.95	4632.93	507990000	-0.0272	-0.0275979	0.106345	0.0885167	5.43276e-05	0.122108	0.440079	0.853705	0.832057	0.193619	0.579865	4	55.8216	0.254646	0	17.944	-0.36	99.882	0.0340335	0.0318096	1.52	-0.05	0.254646	4.02216	-0.36	0.0318096	-0.05	-0.0275979	0.579865	0.338325	0.796467	0.774823	0.187716	0.524333	4	0.524333	9.85222e-06	0	0	0.590823	0.0499122
2012-07-15	EGX30	4867.75	4829.25	4868.11	4687.77	713460000	0.011	0.010929	0.0787127	0.0885167	1.53183e-05	0.124926	0.11309	0.853705	0.711831	0.204762	0.470847	4	55.8216	0.254646	0	16.294	-0.47	105.4	0.0485518	0.0324033	1.49	-0.03	0.254646	4.02216	-0.47	0.0324033	-0.03	0.010929	0.470847	0.0854418	0.796467	0.624704	0.198472	0.426271	4	0.426271	9.85525e-06	0	0	0.524333	-0.0275979
2012-07-22	EGX30	4753.12	4866.29	4876.87	4718.75	694000000	-0.0235	-0.0238306	0.0361389	0.0885167	3.4338e-05	0.179401	0.272519	0.697126	0.723217	0.420092	0.528239	4	55.8216	0.254646	0	18.532	0.43	104.18	-0.00637662	0.0418956	1.58	0.09	0.254646	4.02216	0.43	0.0418956	0.09	-0.0238306	0.528239	0.208739	0.543638	0.638922	0.406335	0.449408	4	0.449408	9.85271e-06	0	0	0.426271	0.010929
2012-07-29	EGX30	4989.44	4774.34	5006.78	4738.79	833580000	0.0497	0.0485224	0.0355308	0.0885167	5.82097e-05	0.178142	0.47262	0.690343	0.641545	0.415116	0.554906	4	55.8216	0.254646	0	17.826	-1.06	107.274	0.0302983	0.0223564	1.6	0.02	0.254646	4.02216	-1.06	0.0223564	0.02	0.0485224	0.554906	0.363491	0.538373	0.536943	0.401532	0.460085	4	0.460085	9.73842e-06	0	0	0.449408	-0.0238306
2012-08-05	EGX30	4960.98	5013.35	5078.27	4936.45	644360000	-0.0057	-0.00572038	0.0308274	0.0881914	8.87761e-06	0.177466	0.0591023	0.63612	0.752263	0.412441	0.464982	4	47.7966	-0.155206	0	15.456	-0.9	112.494	0.031974	0.0238752	1.65	0.05	-0.155206	3.86695	-0.9	0.0238752	0.05	-0.00572038	0.464982	0.0436891	0.495863	0.67519	0.398949	0.403423	4	0.403423	4.73596e-06	0	0	0.460085	0.0485224
2012-08-12	EGX30	5163.53	4978.54	5167.41	4966.69	596740000	0.0408	0.0400172	0.0350547	0.0881914	6.70596e-05	0.173422	0.546802	0.683277	0.780127	0.396458	0.601666	4	47.7966	-0.155206	0	14.184	-1.29	115.042	0.0181321	0.0213201	1.81	0.16	-0.155206	3.86695	-1.29	0.0213201	0.16	0.0400172	0.601666	0.420862	0.532463	0.709981	0.38352	0.511706	4	0.511706	4.6804e-06	0	0	0.403423	-0.00572038
2012-08-19	EGX30	5215.65	5179.17	5220.27	5145.18	367610000	0.0101	0.0100433	0.0253872	0.0881914	2.73204e-05	0.176294	0.213696	0.575433	0.914197	0.407811	0.527784	4	47.7966	-0.155206	0	15.058	1.73	116.102	0.00484933	0.0212224	1.68	-0.13	-0.155206	3.86695	1.73	0.0212224	-0.13	0.0100433	0.527784	0.163247	0.448762	0.877387	0.39448	0.470969	4	0.470969	4.68177e-06	0	0	0.511706	0.0400172
2012-08-26	EGX30	5332.25	5259.93	5342.03	5223.99	750820000	0.0224	0.0221096	0.019321	0.0881914	2.94472e-05	0.183391	0.231523	0.507763	0.68997	0.435865	0.466281	4	47.7966	-0.155206	0	17.04	2.29	113.02	-0.0159349	0.0250247	1.57	-0.11	-0.155206	3.86695	2.29	0.0250247	-0.11	0.0221096	0.466281	0.177034	0.396242	0.597408	0.421561	0.398061	4	0.398061	4.86097e-06	0	0	0.470969	0.0100433
2012-09-02	EGX30	5542.75	5376.34	5571.79	5376.34	823610000	0.0395	0.0387175	0.0143307	0.0881914	4.70095e-05	0.177066	0.378736	0.452094	0.647379	0.410863	0.472268	4	61.9502	0.259377	0	16.425	-3.09	114.11	-0.00254867	0.0214429	1.67	0.1	0.259377	4.12633	-3.09	0.0214429	0.1	0.0387175	0.472268	0.290884	0.353036	0.544227	0.397426	0.396393	4	0.396393	2.0989e-05	0	0	0.398061	0.0221096
2012-09-09	EGX30	5662.15	5574.13	5779.12	5548.13	866840000	0.0215	0.0213129	0.0118117	0.0866221	2.45869e-05	0.153158	0.190783	0.41553	0.622084	0.316359	0.386189	4	61.9502	0.259377	0	15.41	0.13	115.408	0.0332325	0.0184642	1.88	0.21	0.259377	4.12633	0.13	0.0184642	0.21	0.0213129	0.386189	0.145527	0.322602	0.512643	0.306199	0.321743	4	0.321743	2.17628e-05	0	0	0.396393	0.0387175
2012-09-16	EGX30	5827.91	5704.06	6024.75	5704.06	1130000000	0.0293	0.0288548	0.00805723	0.0866221	2.55352e-05	0.150461	0.198731	0.373648	0.468102	0.305698	0.336545	4	61.9502	0.259377	0	14.14	-0.53	111.832	-0.0543084	0.0561568	1.77	-0.11	0.259377	4.12633	-0.53	0.0561568	-0.11	0.0288548	0.336545	0.151674	0.290096	0.320374	0.295908	0.264513	4	0.264513	2.18015e-05	0	0	0.321743	0.0213129
2012-09-23	EGX30	5887.04	5827.05	6006.96	5765.14	734760000	0.0101	0.0100949	0.0120903	0.0866221	1.3739e-05	0.152885	0.0998522	0.418638	0.699367	0.315276	0.383283	4	61.9502	0.259377	0	15.392	1.75	110.354	0.000808516	0.0362998	1.65	-0.12	0.259377	4.12633	1.75	0.0362998	-0.12	0.0100949	0.383283	0.0752038	0.325014	0.609142	0.305154	0.328628	4	0.328628	2.18368e-05	0	0	0.264513	0.0288548
2012-09-30	EGX30	5726.12	5886.79	5891.07	5558.39	618360000	-0.0273	-0.0277152	0.0251134	0.0866221	4.48204e-05	0.146875	0.360386	0.563914	0.767476	0.291521	0.495824	4	61.9502	0.259377	0	15.268	-1.4	111.408	0.00724738	0.0357538	1.75	0.1	0.259377	4.12633	-1.4	0.0357538	0.1	-0.0277152	0.495824	0.276693	0.437767	0.694185	0.282222	0.422717	4	0.422717	2.2536e-05	0	0	0.328628	0.0100949
2012-10-07	EGX30	5739.02	5699.22	5756.95	5509.98	479660000	0.0023	0.0022503	0.0235389	0.0866221	4.69145e-06	0.131093	0.0240126	0.546351	0.848633	0.229136	0.412033	4	65.6199	0.0575485	0	15.9	1.81	114.876	0.0263937	0.0237159	1.69	-0.06	0.0575485	4.18388	1.81	0.0237159	-0.06	0.0022503	0.412033	0.0165517	0.424135	0.795522	0.222001	0.364552	4	0.364552	3.71065e-05	0	0	0.422717	-0.0277152
2012-10-14	EGX30	5803	5737.83	5875.94	5678.25	794530000	0.0111	0.0110866	0.0181973	0.0866221	1.39536e-05	0.143973	0.101651	0.486763	0.664394	0.280052	0.383215	4	65.6199	0.0575485	0	15.53	0.92	113.592	-0.0288931	0.016718	1.79	0.1	0.0575485	4.18388	0.92	0.016718	0.1	0.0110866	0.383215	0.0765949	0.377888	0.565473	0.271151	0.322777	4	0.322777	3.82454e-05	0	0	0.364552	0.0022503
2012-10-21	EGX30	5793.15	5802.41	5807.42	5662.21	421360000	-0.0017	-0.00169884	0.0166771	0.0866221	4.0318e-06	0.130904	0.0184832	0.469805	0.882746	0.228388	0.399856	4	65.6199	0.0575485	0	17.942	0.75	108.27	-0.0270862	0.0304564	1.78	-0.01	0.0575485	4.18388	0.75	0.0304564	-0.01	-0.00169884	0.399856	0.0122755	0.364726	0.838116	0.221279	0.359099	4	0.359099	3.81823e-05	0	0	0.322777	0.0110866
2012-10-28	EGX30	5574.18	5797.76	5896.37	5574.13	429910000	-0.0378	-0.038531	0.0218685	0.0866221	8.96257e-05	0.166525	0.735958	0.527716	0.877744	0.369194	0.627653	4	65.6199	0.0575485	0	17.6267	-0.22	108.85	-0.0195657	0.0221279	1.75	-0.03	0.0575485	4.18388	-0.22	0.0221279	-0.03	-0.038531	0.627653	0.567149	0.409673	0.83187	0.357202	0.541473	4	0.541473	3.62393e-05	0	0	0.359099	-0.00169884
2012-11-04	EGX30	5611.47	5573.81	5611.47	5427.43	430430000	0.0067	0.0066675	0.0225728	0.0866221	1.54903e-05	0.166786	0.114532	0.535574	0.877439	0.370226	0.474443	4	56.6946	-0.1462	0	18.436	1.02	107.782	0.0168992	0.0405295	1.61	-0.14	-0.1462	4.03768	1.02	0.0405295	-0.14	0.0066675	0.474443	0.0865568	0.415771	0.83149	0.358199	0.423004	4	0.423004	1.15534e-05	0	0	0.541473	-0.038531
2012-11-11	EGX30	5662.39	5611.69	5693.81	5583.33	279590000	0.0091	0.00903335	0.0220844	0.0866221	3.23093e-05	0.192076	0.255514	0.530125	0.9657	0.470196	0.555384	4	56.6946	-0.1462	0	17.13	-2.2	109.118	-0.0167119	0.036904	1.58	-0.03	-0.1462	4.03768	-2.2	0.036904	-0.03	0.00903335	0.555384	0.195588	0.411542	0.941696	0.454701	0.500882	4	0.500882	1.09316e-05	0	0	0.423004	0.0066675
2012-11-18	EGX30	5439.29	5615.09	5615.09	5297.34	429220000	-0.0394	-0.0401975	0.027285	0.077242	9.36525e-05	0.21067	0.769712	0.537546	0.878147	0.543695	0.682275	4	56.6946	-0.1462	0	15.1925	-1.27	110.255	0.0307007	0.0314315	1.7	0.12	-0.1462	4.03768	-1.27	0.0314315	0.12	-0.0401975	0.682275	0.593254	0.405016	0.832374	0.525652	0.589074	4	0.589074	1.0914e-05	0	0	0.500882	0.00903335
2012-11-25	EGX30	4807.67	5129.14	5129.14	4683.46	493380000	-0.1161	-0.123436	0.0619336	0.0986883	0.000250184	0.188125	1	0.908567	0.840605	0.454577	0.800937	4	56.6946	-0.1462	0	15.572	0.73	109.816	0.00633544	0.0240082	1.62	-0.08	-0.1462	4.03768	0.73	0.0240082	-0.08	-0.123436	0.800937	1	0.822869	0.785498	0.439624	0.761998	4	0.761998	1.08352e-05	0	0	0.589074	-0.0401975
2012-12-02	EGX30	4838.51	4809.96	5079.62	4801.95	383090000	0.0064	0.00639426	0.0618695	0.0986883	1.66913e-05	0.162074	0.124599	0.908567	0.905139	0.351601	0.572476	4	53.5168	-0.0576846	0	16.54	0.03	109.078	-0.0337647	0.0194034	1.64	0.02	-0.0576846	3.98	0.03	0.0194034	0.02	0.00639426	0.572476	0.0943422	0.822314	0.866077	0.340219	0.530738	4	0.530738	7.72183e-06	0	0	0.761998	-0.123436
2012-12-09	EGX30	5162.94	4851.96	5162.94	4851.96	374360000	0.0671	0.0648994	0.0795266	0.0986883	0.000173361	0.191699	1	0.908567	0.910247	0.468703	0.821879	4	53.5168	-0.0576846	0	16.226	1.1	109.096	0.0195904	0.0276247	1.72	0.08	-0.0576846	3.98	1.1	0.0276247	0.08	0.0648994	0.821879	1	0.852369	0.872455	0.45326	0.794521	4	0.794521	7.66634e-06	0	0	0.530738	0.00639426
2012-12-16	EGX30	5443	5140.35	5443	5140.35	622860000	0.0542	0.0528242	0.0861772	0.0914307	8.48091e-05	0.175976	0.695584	0.869422	0.764843	0.406554	0.684101	4	53.5168	-0.0576846	0	16.956	0.84	109.792	-0.00137356	0.0153241	1.77	0.05	-0.0576846	3.98	0.84	0.0153241	0.05	0.0528242	0.684101	0.535925	0.812482	0.690898	0.393266	0.608143	4	0.608143	7.68695e-06	0	0	0.794521	0.0648994
2012-12-23	EGX30	5417.59	5455.11	5505.21	5261.66	456120000	-0.0047	-0.00467931	0.0341502	0.0914307	1.0259e-05	0.134089	0.0706812	0.690659	0.862407	0.240981	0.466182	4	53.5168	-0.0576846	0	19.8775	4.88	109.812	0.00839498	0.0226085	1.73	-0.04	-0.0576846	3.98	4.88	0.0226085	-0.04	-0.00467931	0.466182	0.0526438	0.542435	0.81272	0.233435	0.410308	4	0.410308	8.8913e-06	0	0	0.608143	0.0528242
2012-12-30	EGX30	5734.39	5433.91	5734.88	5430.46	491600000	0.0585	0.0568303	0.0318306	0.0914307	0.000115603	0.133856	0.953706	0.664783	0.841647	0.240061	0.675049	4	53.5168	-0.0576846	0	15.2725	-8.89	112.347	0.0227293	0.0210207	1.93	0.2	-0.0576846	3.98	-8.89	0.0210207	0.2	0.0568303	0.675049	0.735549	0.522352	0.786798	0.232547	0.569311	4	0.569311	7.59939e-05	0	0	0.410308	-0.00467931
2013-01-06	EGX30	5754.51	5738.11	5884.45	5733.97	442100000	0.0035	0.00350251	0.0322097	0.0914307	7.92245e-06	0.181052	0.0510959	0.669012	0.870611	0.426619	0.504334	4	83.8784	0.449372	0	13.614	-0.47	112.372	-0.0204602	0.0244248	1.89	-0.04	0.449372	4.42937	-0.47	0.0244248	-0.04	0.00350251	0.504334	0.0374971	0.525634	0.822963	0.412635	0.449682	4	0.449682	0.00381467	0	0	0.569311	0.0568303
2013-01-13	EGX30	5661.25	5752.55	5754.16	5651.85	358870000	-0.0162	-0.0163392	0.032375	0.0914307	4.55295e-05	0.142309	0.36633	0.670855	0.919311	0.273473	0.557492	4	83.8784	0.449372	0	13.304	-0.9	111.346	0.0127023	0.0135134	1.87	-0.02	0.449372	4.42937	-0.9	0.0135134	-0.02	-0.0163392	0.557492	0.28129	0.527065	0.883772	0.264801	0.489232	4	0.489232	0.00561858	0	0	0.449682	0.00350251
2013-01-20	EGX30	5689.23	5704.86	5735.12	5629.6	318890000	0.0049	0.0049302	0.0312775	0.0914307	1.54605e-05	0.141586	0.114282	0.658613	0.942704	0.270615	0.496554	4	83.8784	0.449372	0	12.6175	0.43	113.718	0.019239	0.0159728	1.98	0.11	0.449372	4.42937	0.43	0.0159728	0.11	0.0049302	0.496554	0.0863635	0.517563	0.912982	0.262041	0.444738	4	0.444738	0.00565426	0	0	0.489232	-0.0163392
2013-01-27	EGX30	5606.49	5636.98	5702.03	5489.45	369170000	-0.0145	-0.0146501	0.0114159	0.0914307	3.96838e-05	0.162342	0.317329	0.43705	0.913284	0.352659	0.505081	4	83.8784	0.449372	0	13.676	0.01	115.132	0.0145581	0.0115391	2.04	0.06	0.449372	4.42937	0.01	0.0115391	0.06	-0.0146501	0.505081	0.243394	0.345603	0.876247	0.341241	0.451621	4	0.451621	0.00392501	0	0	0.444738	0.0049302
2013-02-03	EGX30	5702.93	5609.11	5804.4	5609.11	689420000	0.0172	0.0170552	0.0160884	0.0914307	2.47385e-05	0.158289	0.192053	0.489174	0.725897	0.336639	0.435941	4	63.8478	-0.272866	0	13.664	0.12	117.154	0.0285795	0.018422	1.99	-0.05	-0.272866	4.1565	0.12	0.018422	-0.05	0.0170552	0.435941	0.146509	0.386057	0.642268	0.325775	0.375153	4	0.375153	0.000271174	0	0	0.451621	-0.0146501
2013-02-10	EGX30	5715.87	5705.48	5762.61	5673.57	483230000	0.0023	0.00226644	0.0130627	0.0914307	4.69019e-06	0.16111	0.024002	0.455421	0.846545	0.347789	0.418439	4	63.8478	-0.272866	0	12.736	-0.56	118.098	-0.0126959	0.0119519	2.01	0.02	-0.272866	4.1565	-0.56	0.0119519	0.02	0.00226644	0.418439	0.0165436	0.35986	0.792913	0.33654	0.376464	4	0.376464	4.76557e-05	0	0	0.375153	0.0170552
2013-02-17	EGX30	5626.92	5715.82	5727.89	5597.97	345980000	-0.0156	-0.0156843	0.0155598	0.0914307	4.53329e-05	0.14372	0.364683	0.483276	0.926853	0.27905	0.513466	4	63.8478	-0.272866	0	14.095	1.71	115.3	-0.0316718	0.0196672	1.97	-0.04	-0.272866	4.1565	1.71	0.0196672	-0.04	-0.0156843	0.513466	0.280016	0.38148	0.89319	0.270184	0.456217	4	0.456217	7.21733e-05	0	0	0.376464	0.00226644
2013-02-24	EGX30	5489.46	5627.36	5628.89	5489.46	290270000	-0.0244	-0.0247323	0.0186409	0.0914307	8.52046e-05	0.162665	0.698899	0.517648	0.959451	0.353936	0.632483	4	63.8478	-0.272866	0	16.292	1.19	112.418	-0.0321629	0.0251025	1.86	-0.11	-0.272866	4.1565	1.19	0.0251025	-0.11	-0.0247323	0.632483	0.538489	0.408157	0.933893	0.342473	0.555753	4	0.555753	0.000693791	0	0	0.456217	-0.0156843
2013-03-03	EGX30	5365.62	5505.31	5510.87	5237.78	5.1692e+08	-0.0226	-0.022818	0.0123045	0.0914307	4.41421e-05	0.158238	0.354701	0.446963	0.826832	0.336437	0.491233	4	77.1317	0.189013	0	13.334	-2.77	109.984	-0.0112304	0.0148436	2.06	0.2	0.189013	4.34551	-2.77	0.0148436	0.2	-0.022818	0.491233	0.272296	0.353296	0.768299	0.32558	0.429868	4	0.429868	0.0107626	0	0	0.555753	-0.0247323
2013-03-10	EGX30	5207.21	5367.74	5428.82	5207.12	384750000	-0.0295	-0.0299677	0.00590879	0.0914307	7.78888e-05	0.170563	0.637576	0.375617	0.904168	0.385158	0.57563	4	77.1317	0.189013	0	11.652	-1.29	108.41	0.00375751	0.0156496	2.01	-0.05	0.189013	4.34551	-1.29	0.0156496	-0.05	-0.0299677	0.57563	0.491063	0.312482	0.864864	0.372613	0.510255	4	0.510255	0.0326161	0	0	0.429868	-0.022818
2013-03-17	EGX30	5224.42	5211.43	5289.76	5127.12	312850000	0.0033	0.00329958	0.0148796	0.0914307	1.05469e-05	0.134148	0.0730945	0.475689	0.946239	0.241213	0.434059	4	77.1317	0.189013	0	13.596	2.27	107.328	-0.0260405	0.0272247	1.93	-0.08	0.189013	4.34551	2.27	0.0272247	-0.08	0.00329958	0.434059	0.0545102	0.375591	0.917395	0.233658	0.395289	4	0.395289	0.0809987	0	0	0.510255	-0.0299677
2013-03-24	EGX30	5183.2	5226.69	5270.05	5124.08	312280000	-0.0079	-0.00792116	0.0149271	0.0914307	2.53656e-05	0.131203	0.19731	0.476219	0.946572	0.229571	0.462418	4	77.1317	0.189013	0	13.09	-0.87	107.683	0.0181426	0.0137917	1.87	-0.06	0.189013	4.34551	-0.87	0.0137917	-0.06	-0.00792116	0.462418	0.150574	0.376003	0.917812	0.22242	0.416702	4	0.416702	0.188554	0	0	0.395289	0.00329958
2013-03-31	EGX30	4985.05	5182.72	5184.91	4905.31	460800000	-0.0382	-0.0389792	0.0194764	0.0914307	8.45903e-05	0.140349	0.69375	0.526968	0.859669	0.265724	0.586528	4	77.1317	0.189013	0	13.676	1.22	107.062	-0.0421829	0.0336505	1.72	-0.15	0.189013	4.34551	1.22	0.0336505	-0.15	-0.0389792	0.586528	0.534506	0.41539	0.809301	0.25732	0.504129	4	0.504129	0.42785	0	0	0.416702	-0.00792116
2013-04-07	EGX30	5231.47	4997.03	5231.7	4996.4	407290000	0.0494	0.0482489	0.0361274	0.0914307	0.000118463	0.0692223	0.977684	0.712715	0.890979	0	0.645344	4	99.3251	0.252884	0	12.538	-1.86	103.248	-0.0332451	0.0346977	1.75	0.03	0.252884	4.5984	-1.86	0.0346977	0.03	0.0482489	0.645344	0.754092	0.559553	0.848396	0	0.54051	4	0.54051	0.960339	1	0.252884	0.504129	-0.0389792
2013-04-14	EGX30	5268.43	5232.12	5306.42	5230.48	348240000	0.0071	0.0070401	0.0362494	0.0914307	2.02162e-05	0.0569369	0.154146	0.714075	0.925531	0	0.448438	4	99.3251	0.252884	0	16.054	2.91	98.092	-0.0164398	0.0273994	1.73	-0.02	0.252884	4.5984	2.91	0.0273994	-0.02	0.0070401	0.448438	0.117193	0.560609	0.891539	0	0.392335	4	0.392335	0.988824	1	0.252884	0.54051	0.0482489
2013-04-21	EGX30	5225.24	5270.63	5291.59	5208.38	236060000	-0.0082	-0.00823168	0.0362783	0.0914307	3.48711e-05	0.0726534	0.276988	0.714398	0.99117	0	0.495639	4	99.3251	0.252884	0	13.742	-1.36	100.608	0.0342754	0.0188725	1.7	-0.03	0.252884	4.5984	-1.36	0.0188725	-0.03	-0.00823168	0.495639	0.212195	0.560859	0.973499	0	0.436638	4	0.436638	0.987873	1	0.252884	0.392335	0.0070401
2013-04-28	EGX30	5276.62	5232.15	5276.62	5192.57	155550000	0.0098	0.00978501	0.0240365	0.0914307	6.29059e-05	0.108863	0.511985	0.577837	1	0.141266	0.557772	4	99.3251	0.252884	0	13.632	-0.76	101.534	0.0213545	0.0579585	1.78	0.08	0.252884	4.5984	-0.76	0.0579585	0.08	0.00978501	0.557772	0.393935	0.454871	1	0.137178	0.496496	4	0.496496	0.941642	1	0.252884	0.436638	-0.00823168
2013-05-05	EGX30	5404.29	5266.66	5413.39	5266.66	157620000	0.0242	0.0239073	0.0131726	0.0914307	0.000151677	0.135158	1	0.456647	1	0.245207	0.675463	4	66.1256	-0.406842	0	12.774	-0.26	103.774	-0.0319584	0.0263348	1.9	0.12	-0.406842	4.19156	-0.26	0.0263348	0.12	0.0239073	0.675463	0.969406	0.360812	1	0.237514	0.641933	4	0.641933	0.0799221	0	0	0.496496	0.00978501
2013-05-12	EGX30	5427.97	5400.52	5470.08	5374.17	309950000	0.0044	0.00437213	0.0133127	0.0914307	1.41059e-05	0.152413	0.102928	0.45821	0.947935	0.313414	0.455622	4	66.1256	-0.406842	0	12.73	-0.14	102.908	0.0245698	0.0304436	1.95	0.05	-0.406842	4.19156	-0.14	0.0304436	0.05	0.00437213	0.455622	0.0775823	0.362025	0.919514	0.303356	0.415619	4	0.415619	0.00681879	0	0	0.641933	0.0239073
2013-05-19	EGX30	5343.21	5426.86	5460.28	5338.25	212540000	-0.0156	-0.0157386	0.0164268	0.0914307	7.40502e-05	0.156452	0.605399	0.492948	1	0.329378	0.606931	4	66.1256	-0.406842	0	13.654	1.54	102.298	-0.025261	0.0257914	2.01	0.06	-0.406842	4.19156	1.54	0.0257914	0.06	-0.0157386	0.606931	0.466179	0.388986	0.990683	0.318767	0.541154	4	0.541154	0.000617172	0	0	0.415619	0.00437213
2013-05-26	EGX30	5438.77	5342.44	5438.77	5274.88	264910000	0.0179	0.0177263	0.0175459	0.0860372	6.69146e-05	0.157514	0.545587	0.476342	0.97429	0.333576	0.582448	4	66.1256	-0.406842	0	15.035	2.31	102.032	-0.00803297	0.0324442	2.16	0.15	-0.406842	4.19156	2.31	0.0324442	0.15	0.0177263	0.582448	0.419921	0.369034	0.952421	0.322819	0.516049	4	0.516049	9.14768e-05	0	0	0.541154	-0.0157386
2013-06-02	EGX30	5061.02	5410.55	5426.35	5048.49	313020000	-0.0695	-0.0719849	0.039523	0.0957267	0.000229969	0.240515	1	0.773765	0.946139	0.661668	0.845393	4	66.8992	0.0116306	0	16.364	-1.16	102.924	0.0356028	0.0202301	2.17	0.01	0.0116306	4.20319	-1.16	0.0202301	0.01	-0.0719849	0.845393	1	0.612563	0.917271	0.639534	0.792342	4	0.792342	5.17566e-05	0	0	0.516049	0.0177263
2013-06-09	EGX30	4651.76	5061.64	5069.77	4513	354070000	-0.0809	-0.0843224	0.0479597	0.0998392	0.000238152	0.330482	1	0.89006	0.92212	1	0.953045	4	66.8992	0.0116306	0	16.932	2.01	103.392	0.00984853	0.0326073	2.14	-0.03	0.0116306	4.20319	2.01	0.0326073	-0.03	-0.0843224	0.953045	1	0.708208	0.887279	0.982827	0.894579	4	0.894579	4.79913e-05	0	0	0.792342	-0.0719849
2013-06-16	EGX30	4625.81	4653.56	4765.23	4562.73	227190000	-0.0056	-0.00559415	0.0498029	0.0932478	2.46232e-05	0.336406	0.191087	0.87507	0.996361	1	0.76563	4	66.8992	0.0116306	0	17.888	1.75	103.93	-0.0461486	0.037019	2.52	0.38	0.0116306	4.20319	1.75	0.037019	0.38	-0.00559415	0.76563	0.145762	0.687941	0.97998	1	0.703421	4	0.703421	4.76015e-05	0	0	0.894579	-0.0843224
2013-06-23	EGX30	4685.09	4626.8	4687.7	4479.83	234960000	0.0128	0.0127336	0.0480374	0.0932478	5.41949e-05	0.33858	0.438966	0.855375	0.991814	1	0.821539	4	66.8992	0.0116306	0	17.902	-2.04	101.432	0.0210015	0.0289512	2.52	0	0.0116306	4.20319	-2.04	0.0289512	0	0.0127336	0.821539	0.337464	0.672655	0.974303	1	0.746106	4	0.746106	4.72134e-05	0	0	0.703421	-0.00559415
2013-06-30	EGX30	5334.54	4679.8	5339.64	4663.11	293050000	0.1386	0.129818	0.0884377	0.0932478	0.000442988	0.228282	1	0.879222	0.957824	0.61331	0.862589	4	66.8992	0.0116306	0	15.975	-1.97	105.183	0.0473535	0.0261141	2.73	0.21	0.0116306	4.20319	-1.97	0.0261141	0.21	0.129818	0.862589	1	0.822468	0.931861	0.592853	0.836796	4	0.836796	4.34699e-05	0	0	0.746106	0.0127336
2013-07-07	EGX30	5276.73	5412.67	5413.26	5123.02	629150000	-0.0108	-0.0108961	0.0663122	0.0932478	1.73187e-05	0.21175	0.129858	0.879222	0.761163	0.547961	0.579551	4	41.9861	-0.465848	0	14.238	-1.05	108.258	0.0145044	0.00998956	2.61	-0.12	-0.465848	3.73734	-1.05	0.00998956	-0.12	-0.0108961	0.579551	0.0984097	0.822468	0.686302	0.52977	0.534237	4	0.534237	3.97919e-06	0	0	0.836796	0.129818
2013-07-14	EGX30	5346.61	5278.72	5389.33	5232.82	365110000	0.0132	0.0131561	0.0634139	0.0932478	3.60333e-05	0.225509	0.28673	0.879222	0.91566	0.602352	0.670991	4	41.9861	-0.465848	0	13.66	-1.3	109.412	0.00283922	0.00533475	2.5	-0.11	-0.465848	3.73734	-1.3	0.00533475	-0.11	0.0131561	0.670991	0.21973	0.805784	0.879213	0.582274	0.62175	4	0.62175	4.24647e-06	0	0	0.534237	-0.0108961
2013-07-21	EGX30	5352.56	5349.47	5460.5	5280.26	390300000	0.0011	0.00111224	0.0650916	0.0932478	2.84969e-06	0.216455	0.00857444	0.879222	0.90092	0.566562	0.58882	4	41.9861	-0.465848	0	12.764	0.18	108.398	-0.0163205	0.0125225	2.58	0.08	-0.465848	3.73734	0.18	0.0125225	0.08	0.00111224	0.58882	0.00461232	0.82031	0.860809	0.547726	0.558364	4	0.558364	7.46115e-05	0	0	0.62175	0.0131561
2013-07-28	EGX30	5375.68	5357.9	5400.72	5274.89	228780000	0.0043	0.00431013	0.00994765	0.0932478	1.88396e-05	0.22301	0.142607	0.430472	0.99543	0.592473	0.540246	4	41.9861	-0.465848	0	13.03	-0.74	108.606	0.0189693	0.0208757	2.63	0.05	-0.465848	3.73734	-0.74	0.0208757	0.05	0.00431013	0.540246	0.108269	0.342877	0.978818	0.572738	0.500676	4	0.500676	0.00820223	0	0	0.558364	0.00111224
2013-08-04	EGX30	5616.38	5374.38	5630.7	5374.18	358860000	0.0448	0.0438023	0.0194824	0.0932478	0.000122059	0.200676	1	0.536836	0.919317	0.504191	0.740086	4	99.3562	0.861372	0	12.736	1.43	108.556	-0.0104531	0.0179301	2.57	-0.06	0.861372	4.59871	1.43	0.0179301	-0.06	0.0438023	0.740086	0.777405	0.425429	0.88378	0.487517	0.643533	4	0.643533	0.946957	1	0.861372	0.500676	0.00431013
2013-08-11	EGX30	5549.19	5614.08	5681.96	5546.25	258450000	-0.012	-0.0120354	0.0240662	0.0932478	4.65674e-05	0.196034	0.375031	0.587969	0.978069	0.485839	0.606727	4	99.3562	0.861372	0	13.452	0.96	110.726	0.0302324	0.0194522	2.84	0.27	0.861372	4.59871	0.96	0.0194522	0.27	-0.0120354	0.606727	0.288018	0.465114	0.957141	0.469802	0.545019	4	0.545019	0.997142	1	0.861372	0.643533	0.0438023
2013-08-18	EGX30	5424.63	5340.66	5424.99	5315.3	342780000	-0.0224	-0.0227023	0.0291704	0.0932478	6.62299e-05	0.206808	0.539847	0.644908	0.928726	0.528428	0.660477	4	99.3562	0.861372	0	14.938	-0.39	111.12	0.00267929	0.0163538	2.82	-0.02	0.861372	4.59871	-0.39	0.0163538	-0.02	-0.0227023	0.660477	0.415483	0.509306	0.895528	0.510914	0.582808	4	0.582808	0.999824	1	0.861372	0.545019	-0.0120354
2013-08-25	EGX30	5267.72	5443.41	5483.74	5217.26	340450000	-0.0289	-0.0293521	0.0333543	0.0932478	8.62155e-05	0.225693	0.707373	0.691581	0.930089	0.603077	0.73303	4	99.3562	0.861372	0	16.414	3.03	115.318	0.0337618	0.0294433	2.78	-0.04	0.861372	4.59871	3.03	0.0294433	-0.04	-0.0293521	0.73303	0.545042	0.54553	0.89723	0.582975	0.642694	4	0.642694	0.999969	1	0.861372	0.582808	-0.0227023
2013-09-01	EGX30	5169.89	5272.21	5341.9	5155.21	322750000	-0.0186	-0.0187462	0.00725167	0.0932478	5.80828e-05	0.221141	0.471556	0.400398	0.940446	0.585084	0.599371	4	142.849	0.363075	1	16.0275	-1.16	116.025	0.0101236	0.0123846	2.94	0.16	0.363075	4.96179	-1.16	0.0123846	0.16	-0.0187462	0.599371	0.362668	0.322468	0.910162	0.565605	0.540226	4	0.540226	1	1	0.363075	0.642694	-0.0293521
2013-09-08	EGX30	5488.01	5174.19	5502.01	5172.84	468770000	0.0615	0.0597143	0.0418865	0.0932478	0.000127385	0.222889	1	0.78676	0.855005	0.591993	0.80844	4	142.849	0.363075	1	14.486	-1.69	113.218	-0.0333277	0.0328307	2.9	-0.04	0.363075	4.96179	-1.69	0.0328307	-0.04	0.0597143	0.80844	0.811929	0.619401	0.803478	0.572275	0.701771	4	0.701771	1	1	0.363075	0.540226	-0.0187462
2013-09-15	EGX30	5529.98	5486.28	5569.33	5480.07	473670000	0.0076	0.00761849	0.0397673	0.0932478	1.6084e-05	0.225601	0.119508	0.76312	0.852138	0.602714	0.58437	4	142.849	0.363075	1	13.756	-1.04	109.976	-0.0276491	0.0311288	2.75	-0.15	0.363075	4.96179	-1.04	0.0311288	-0.15	0.00761849	0.58437	0.0904052	0.601054	0.799898	0.582625	0.518495	4	0.518495	1	1	0.363075	0.701771	0.0597143
2013-09-22	EGX30	5704	5547.49	5704	5547.49	472690000	0.0315	0.0309835	0.0334285	0.0932478	6.55472e-05	0.237054	0.534124	0.692408	0.852712	0.647987	0.681808	4	142.849	0.363075	1	14.384	2.34	108.802	-0.00701054	0.0249954	2.64	-0.11	0.363075	4.96179	2.34	0.0249954	-0.11	0.0309835	0.681808	0.411057	0.546172	0.800614	0.626327	0.596043	4	0.596043	1	1	0.363075	0.518495	0.00761849
2013-09-29	EGX30	5726.22	5704.78	5726.22	5608.13	345050000	0.0039	0.00388794	0.0257391	0.0932478	1.12678e-05	0.232801	0.0791374	0.606631	0.927397	0.631176	0.561085	4	142.849	0.363075	1	16.63	1.28	108.634	-0.000274135	0.022859	2.66	0.02	0.363075	4.96179	1.28	0.022859	0.02	0.00388794	0.561085	0.0591836	0.479599	0.89387	0.610099	0.510688	4	0.510688	0.999971	1	0.363075	0.596043	0.0309835
2013-10-06	EGX30	5931.7	5729.98	5931.7	5729.98	278960000	0.0359	0.0352552	0.0159686	0.0932478	0.000126381	0.236231	1	0.497638	0.966068	0.644732	0.777109	4	59.135	-0.881963	0	18.31	-1.02	110.304	0.0111784	0.0300972	2.7	0.04	-0.881963	4.07982	-1.02	0.0300972	0.04	0.0352552	0.777109	0.80542	0.395006	0.942156	0.623185	0.691442	4	0.691442	0.033592	0	0	0.510688	0.00388794
2013-10-13	EGX30	5986.8	5935.06	5987.43	5933.62	130230000	0.0093	0.0092462	0.0155831	0.0932478	7.0999e-05	0.239042	0.579823	0.493338	1	0.655844	0.682251	4	59.135	-0.881963	0	15.192	-2.68	110.108	-0.0113612	0.0132609	2.6	-0.1	-0.881963	4.07982	-2.68	0.0132609	-0.1	0.0092462	0.682251	0.446399	0.391669	1	0.633912	0.617995	4	0.617995	0.0011423	0	0	0.691442	0.0352552
2013-10-20	EGX30	6171.21	6033.54	6213.43	6005.63	742450000	0.0308	0.0303379	0.0154319	0.0932478	4.08619e-05	0.250105	0.327204	0.491651	0.694868	0.699575	0.553325	4	59.135	-0.881963	0	13.24	0.05	107.822	-0.034406	0.0216542	2.53	-0.07	-0.881963	4.07982	0.05	0.0216542	-0.07	0.0303379	0.553325	0.251031	0.39036	0.603524	0.676127	0.48026	4	0.48026	5.26877e-05	0	0	0.617995	0.0092462
2013-10-27	EGX30	6181.86	6190.94	6232.75	6033.39	592240000	0.0017	0.00172427	0.0161894	0.0932478	2.91143e-06	0.251995	0.00909196	0.500101	0.78276	0.707044	0.499749	4	59.135	-0.881963	0	13.48	0.19	107.61	0.000756573	0.0306385	2.65	0.12	-0.881963	4.07982	0.19	0.0306385	0.12	0.00172427	0.499749	0.00501256	0.396918	0.713269	0.683337	0.449634	4	0.449634	1.62698e-05	0	0	0.48026	0.0303379
2013-11-03	EGX30	6415.82	6180.32	6431.9	6177.16	530600000	0.0378	0.0371476	0.0168321	0.0932478	7.00106e-05	0.230111	0.571538	0.507271	0.818827	0.620542	0.629545	4	61.4444	0.0383098	0	13.136	-0.38	104.538	-0.014186	0.0274923	2.77	0.12	0.0383098	4.11813	-0.38	0.0274923	0.12	0.0371476	0.629545	0.439992	0.402483	0.758304	0.599834	0.550153	4	0.550153	2.01007e-05	0	0	0.449634	0.00172427
2013-11-10	EGX30	6227.92	6418.28	6419.11	6227.33	625250000	-0.0293	-0.0297244	0.0305345	0.0932478	4.754e-05	0.24975	0.383183	0.660125	0.763445	0.698173	0.626231	4	61.4444	0.0383098	0	12.486	-0.71	107.098	0.0372679	0.0205106	2.71	-0.06	0.0383098	4.11813	-0.71	0.0205106	-0.06	-0.0297244	0.626231	0.294323	0.521117	0.689152	0.674772	0.544841	4	0.544841	2.02732e-05	0	0	0.550153	0.0371476
2013-11-17	EGX30	6457.01	6232.82	6510.73	6232.52	724300000	0.0368	0.036124	0.0319323	0.0932478	4.98743e-05	0.229213	0.40275	0.675718	0.705488	0.616989	0.600236	4	61.4444	0.0383098	0	12.962	0.07	109.324	0.0283248	0.0211009	2.75	0.04	0.0383098	4.11813	0.07	0.0211009	0.04	0.036124	0.600236	0.309456	0.533219	0.616784	0.596404	0.513966	4	0.513966	2.02916e-05	0	0	0.544841	-0.0297244
2013-11-24	EGX30	6184.11	6457.83	6469.45	6162.97	463970000	-0.0423	-0.0431833	0.0425566	0.0664969	9.30734e-05	0.212486	0.764858	0.649951	0.857814	0.550873	0.705874	4	61.4444	0.0383098	0	13.07	1.44	111.315	-0.00260756	0.0136852	2.75	0	0.0383098	4.11813	1.44	0.0136852	0	-0.0431833	0.705874	0.589499	0.478182	0.806985	0.532581	0.601812	4	0.601812	2.05292e-05	0	0	0.513966	0.036124
2013-12-01	EGX30	6332.13	6185.58	6338.49	6185.58	347020000	0.0239	0.0236536	0.0390285	0.0664969	6.8162e-05	0.271006	0.556043	0.610593	0.926245	0.782192	0.718768	4	63.1791	0.0278407	0	14.47	0.09	112.278	0.00386396	0.0187795	2.88	0.13	0.0278407	4.14597	0.09	0.0187795	0.13	0.0236536	0.718768	0.428008	0.447636	0.89243	0.755879	0.630988	4	0.630988	2.58125e-05	0	0	0.601812	-0.0431833
2013-12-08	EGX30	6604.65	6332.43	6604.65	6332.43	441780000	0.043	0.0421373	0.039338	0.0664969	9.53807e-05	0.208906	0.784199	0.614046	0.870798	0.53672	0.701441	4	63.1791	0.0278407	0	14.824	1.97	109.104	-0.0311529	0.019869	2.88	0	0.0278407	4.14597	1.97	0.019869	0	0.0421373	0.701441	0.604457	0.450316	0.823197	0.518918	0.599222	4	0.599222	2.61107e-05	0	0	0.630988	0.0236536
2013-12-15	EGX30	6748.07	6633.91	6791.3	6632.82	729950000	0.0217	0.0214826	0.0373066	0.0664969	2.94302e-05	0.218592	0.231381	0.591386	0.702182	0.575007	0.524989	4	63.1791	0.0278407	0	14.796	-1.97	110.34	0.0369656	0.0297211	2.89	0.01	0.0278407	4.14597	-1.97	0.0297211	0.01	0.0214826	0.524989	0.176924	0.432728	0.612656	0.555878	0.444547	4	0.444547	2.61258e-05	0	0	0.599222	0.0421373
2013-12-22	EGX30	6812.51	6756.78	6876.26	6644.27	555910000	0.0095	0.00950409	0.0134833	0.0664969	1.70965e-05	0.217735	0.127995	0.325629	0.804017	0.571621	0.457316	4	63.1791	0.0278407	0	12.5775	-1.33	111.715	-0.000802819	0.0063183	3.02	0.13	0.0278407	4.14597	-1.33	0.0063183	0.13	0.00950409	0.457316	0.0969688	0.226468	0.739812	0.552609	0.403965	4	0.403965	2.60952e-05	0	0	0.444547	0.0214826
2013-12-29	EGX30	6811.3	6815.3	6832.7	6766.65	349920000	-0.0002	-0.00017763	0.0182311	0.0664969	5.07631e-07	0.203474	0	0.378592	0.924548	0.515248	0.454597	4	63.1791	0.0278407	0	13.8175	1.3	108.733	-0.0502324	0.0270194	3.01	-0.01	0.0278407	4.14597	1.3	0.0270194	-0.01	-0.00017763	0.454597	0	0.267574	0.890311	0.498191	0.414019	4	0.414019	2.55362e-05	0	0	0.403965	0.00950409
2014-01-05	EGX30	6975.04	6819.27	6986.14	6801.33	699870000	0.024	0.0237551	0.0111333	0.0664969	3.39421e-05	0.19515	0.269201	0.299414	0.719783	0.482346	0.442686	4	59.3754	-0.062094	0	12.874	-1.62	107.014	-0.0012206	0.0110007	2.88	-0.13	-0.062094	4.08388	-1.62	0.0110007	-0.13	0.0237551	0.442686	0.206173	0.206122	0.634633	0.466431	0.37834	4	0.37834	1.56371e-05	0	0	0.414019	-0.00017763
2014-01-12	EGX30	7143.62	7018.11	7258.14	7018.11	952690000	0.0242	0.0238816	0.0117444	0.0664969	2.50675e-05	0.189954	0.194811	0.306231	0.571851	0.461805	0.383675	4	59.3754	-0.062094	0	12.562	0.3	107.828	0.0187078	0.0220602	2.84	-0.04	-0.062094	4.08388	0.3	0.0220602	-0.04	0.0238816	0.383675	0.148642	0.211413	0.449919	0.446601	0.314144	4	0.314144	1.52946e-05	0	0	0.37834	0.0237551
2014-01-19	EGX30	7233.38	7144.82	7233.38	6969.82	1040000000	0.0126	0.0124868	0.011434	0.0664969	1.20065e-05	0.181437	0.0853298	0.302768	0.520763	0.428141	0.334251	4	59.3754	-0.062094	0	14.405	5.7	109.14	0.00634222	0.0133601	2.75	-0.09	-0.062094	4.08388	5.7	0.0133601	-0.09	0.0124868	0.334251	0.0639726	0.208725	0.386129	0.414105	0.268233	4	0.268233	1.528e-05	0	0	0.314144	0.0238816
2014-01-26	EGX30	7405.25	7270.95	7408.92	7184.57	1220000000	0.0238	0.0234828	0.00561232	0.0664969	1.92482e-05	0.174262	0.146032	0.237826	0.41544	0.399779	0.299769	4	59.3754	-0.062094	0	17.254	0.27	108.834	-0.00901985	0.0133612	2.67	-0.08	-0.062094	4.08388	0.27	0.0133612	-0.08	0.0234828	0.299769	0.110918	0.175447	0.254619	0.386727	0.231928	4	0.231928	1.52e-05	0	0	0.268233	0.0124868
2014-02-02	EGX30	7426.17	7415.51	7455.85	7285.33	897300000	0.0028	0.00282104	0.0100615	0.0664969	3.14392e-06	0.201474	0.0110407	0.287457	0.604261	0.507341	0.352525	4	57.6089	-0.030203	0	18.604	-3.12	107.734	0.0179591	0.0270536	2.71	0.04	-0.030203	4.05368	-3.12	0.0270536	0.04	0.00282104	0.352525	0.00651968	0.196842	0.490388	0.490559	0.296077	4	0.296077	1.28966e-05	0	0	0.231928	0.0234828
2014-02-09	EGX30	7590.71	7428.83	7593.3	7410.74	687360000	0.0222	0.0219149	0.00956194	0.0664969	3.18827e-05	0.124585	0.251938	0.281885	0.727103	0.203412	0.366084	4	57.6089	-0.030203	0	14.356	-1.72	109.124	-0.0136231	0.0113636	2.75	0.04	-0.030203	4.05368	-1.72	0.0113636	0.04	0.0219149	0.366084	0.192823	0.192517	0.643773	0.197169	0.30657	4	0.30657	3.41033e-05	0	0	0.296077	0.00282104
2014-02-16	EGX30	7892.6	7593.63	7898.71	7532.81	885630000	0.0398	0.0390005	0.0148201	0.0664969	4.4037e-05	0.0944813	0.353819	0.340541	0.611089	0.0844168	0.347467	4	57.6089	-0.030203	0	14.71	1.11	109.74	0.00367546	0.0168048	2.73	-0.02	-0.030203	4.05368	1.11	0.0168048	-0.02	0.0390005	0.347467	0.271614	0.238041	0.498914	0.0822999	0.272718	4	0.272718	0.000794967	0	0	0.30657	0.0219149
2014-02-23	EGX30	8127.44	7940.33	8131.57	7940.33	1260000000	0.0298	0.0293204	0.0153194	0.0664969	2.32701e-05	0.120291	0.179745	0.346111	0.392035	0.186438	0.276082	4	57.6089	-0.030203	0	14.058	-0.68	109.172	-0.000458695	0.0123372	2.66	-0.07	-0.030203	4.05368	-0.68	0.0123372	-0.07	0.0293204	0.276082	0.136991	0.242365	0.225394	0.180783	0.196383	4	0.196383	0.0279898	0	0	0.272718	0.0390005
2014-03-02	EGX30	7949.6	8148.2	8182.59	7845.97	1040000000	-0.0219	-0.0221244	0.0270227	0.0664969	2.12734e-05	0.111715	0.163008	0.476665	0.520763	0.152539	0.328244	4	147.655	0.941204	1	14.462	0.11	109.142	0.00146708	0.0314777	2.8	0.14	0.941204	4.99488	0.11	0.0314777	0.14	-0.0221244	0.328244	0.124047	0.343691	0.386129	0.14806	0.250482	4	0.250482	0.999987	1	0.941204	0.196383	0.0293204
2014-03-09	EGX30	8140.05	7957.69	8170.17	7882.42	1160000000	0.024	0.0236747	0.0271429	0.0664969	2.04092e-05	0.165509	0.155764	0.478006	0.450548	0.365177	0.362374	4	147.655	0.941204	1	15.502	3.71	108.012	-0.00975977	0.0113264	2.65	-0.15	0.941204	4.99488	3.71	0.0113264	-0.15	0.0236747	0.362374	0.118444	0.344731	0.298456	0.353324	0.278739	4	0.278739	1	1	0.941204	0.250482	-0.0221244
2014-03-16	EGX30	8459.38	8151.22	8460.57	8092.1	1250000000	0.0392	0.0384796	0.027006	0.0664969	3.07836e-05	0.140871	0.242726	0.476479	0.397887	0.267788	0.34622	4	147.655	0.941204	1	14.96	-2.82	106.532	-0.00817545	0.0190677	2.75	0.1	0.941204	4.99488	-2.82	0.0190677	0.1	0.0384796	0.34622	0.185698	0.343547	0.232701	0.259312	0.255314	4	0.255314	1	1	0.941204	0.278739	0.0236747
2014-03-23	EGX30	8251.83	8481.8	8597.2	8251.83	939210000	-0.0245	-0.0248409	0.0320939	0.0664969	2.64487e-05	0.135589	0.206389	0.533236	0.579738	0.24691	0.391568	4	147.655	0.941204	1	14.614	-0.59	106.544	-0.00523757	0.0140726	2.73	-0.02	0.941204	4.99488	-0.59	0.0140726	-0.02	-0.0248409	0.391568	0.157596	0.387597	0.459768	0.239159	0.31103	4	0.31103	1	1	0.941204	0.255314	0.0384796
2014-03-30	EGX30	7701.11	8235.96	8236.18	7668.63	966570000	-0.0667	-0.0690705	0.048911	0.0751259	7.14594e-05	0.163086	0.583683	0.767378	0.563729	0.3556	0.567598	4	147.655	0.941204	1	13.48	-0.45	105.262	-0.00215912	0.0310584	2.74	0.01	0.941204	4.99488	-0.45	0.0310584	0.01	-0.0690705	0.567598	0.449384	0.580623	0.439778	0.344079	0.453466	4	0.453466	1	1	0.941204	0.31103	-0.0248409
2014-04-06	EGX30	7899.46	7704.74	7899.46	7387.51	1060000000	0.0258	0.0254299	0.0492955	0.0751259	2.39905e-05	0.14617	0.185783	0.771667	0.509061	0.288734	0.438811	4	89.6823	-0.498608	0	15.44	3.07	106.51	0.00870181	0.0226505	2.63	-0.11	-0.498608	4.49627	3.07	0.0226505	-0.11	0.0254299	0.438811	0.14166	0.583952	0.371517	0.279532	0.344165	4	0.344165	0.99981	1	-0.498608	0.453466	-0.0690705
2014-04-13	EGX30	8103.67	7909.18	8103.67	7861.6	840150000	0.0259	0.0255226	0.0455504	0.0751259	3.03787e-05	0.138383	0.239331	0.72989	0.637701	0.257953	0.466219	4	89.6823	-0.498608	0	14.815	-3.67	109.07	0.0225681	0.0146033	2.73	0.1	-0.498608	4.49627	-3.67	0.0146033	0.1	0.0255226	0.466219	0.183073	0.551528	0.532143	0.249818	0.37914	4	0.37914	0.999656	1	-0.498608	0.344165	0.0254299
2014-04-20	EGX30	8294.88	8196.74	8375.85	8196.74	461900000	0.0236	0.0233214	0.0469253	0.0751259	5.04902e-05	0.122196	0.407912	0.745227	0.859025	0.19397	0.551534	4	89.6823	-0.498608	0	13.418	0.7	109.206	-0.00237097	0.0161841	2.68	-0.05	-0.498608	4.49627	0.7	0.0161841	-0.05	0.0233214	0.551534	0.313448	0.563431	0.808497	0.188054	0.468358	4	0.468358	0.999255	1	-0.498608	0.37914	0.0255226
2014-04-27	EGX30	8256.14	8288.15	8293.84	8134.33	682030000	-0.0047	-0.00468129	0.0147547	0.0751259	6.86376e-06	0.124943	0.0422216	0.386354	0.730221	0.204827	0.340906	4	89.6823	-0.498608	0	13.45	-1.15	109.15	-0.0004566	0.0160391	2.6	-0.08	-0.498608	4.49627	-1.15	0.0160391	-0.08	-0.00468129	0.340906	0.030634	0.2849	0.647667	0.198535	0.290434	4	0.290434	0.997865	1	-0.498608	0.468358	0.0233214
2014-05-04	EGX30	8211.05	8262.59	8398.94	8210.81	953320000	-0.0055	-0.00547636	0.0170591	0.0751259	5.74451e-06	0.147054	0.0328397	0.41206	0.571482	0.292229	0.327153	4	79.5288	-0.120155	0	13.368	0.01	108.48	-0.0112061	0.0109238	2.62	0.02	-0.120155	4.37612	0.01	0.0109238	0.02	-0.00547636	0.327153	0.0233784	0.304852	0.449459	0.282906	0.265149	4	0.265149	0.992905	1	-0.120155	0.290434	-0.00468129
2014-05-11	EGX30	8553.43	8214.02	8554.01	8213.49	823040000	0.0417	0.0408516	0.0226217	0.0751259	4.9635e-05	0.115949	0.400743	0.474113	0.647712	0.169274	0.422961	4	79.5288	-0.120155	0	12.428	-0.48	109.532	0.0240932	0.0150554	2.52	-0.1	-0.120155	4.37612	-0.48	0.0150554	-0.1	0.0408516	0.422961	0.307904	0.353013	0.544643	0.164214	0.342444	4	0.342444	0.990782	1	-0.120155	0.265149	-0.00547636
2014-05-18	EGX30	8727.54	8567.56	8740.14	8482.32	989180000	0.0204	0.0201512	0.022215	0.0751259	2.03716e-05	0.154838	0.155449	0.469576	0.550499	0.322996	0.37463	4	79.5288	-0.120155	0	12.136	-1.08	110.718	-0.00642275	0.0123125	2.54	0.02	-0.120155	4.37612	-1.08	0.0123125	0.02	0.0201512	0.37463	0.1182	0.349491	0.423259	0.312606	0.300889	4	0.300889	0.991122	1	-0.120155	0.342444	0.0408516
2014-05-25	EGX30	8242.94	8728.16	8822.87	8242.94	950480000	-0.0555	-0.0571265	0.0422993	0.0751259	6.01028e-05	0.220269	0.488488	0.693623	0.573144	0.581635	0.584222	4	79.5288	-0.120155	0	11.54	0.04	109.62	-0.00893351	0.0128313	2.48	-0.06	-0.120155	4.37612	0.04	0.0128313	-0.06	-0.0571265	0.584222	0.375763	0.52338	0.451534	0.562276	0.478238	4	0.478238	0.993986	1	-0.120155	0.300889	0.0201512
2014-06-01	EGX30	8498.65	8093.73	8499.26	7723.29	1140000000	0.031	0.0305503	0.0446295	0.0701731	2.67985e-05	0.181136	0.209321	0.692903	0.462251	0.426949	0.447856	4	105.245	0.280172	0	11.588	-0.67	108.984	0	0.0104572	2.6	0.12	0.280172	4.65629	-0.67	0.0104572	0.12	0.0305503	0.447856	0.159863	0.516334	0.313068	0.412954	0.350555	4	0.350555	0.999876	1	0.280172	0.478238	-0.0571265
2014-06-08	EGX30	8746.27	8542.27	8799.73	8503.12	757560000	0.0291	0.02872	0.0420452	0.0564601	3.79112e-05	0.151386	0.302471	0.590111	0.686027	0.309353	0.47199	4	105.245	0.280172	0	11.696	1.45	110.978	0.0354417	0.0293564	2.6	0	0.280172	4.65629	1.45	0.0293564	0	0.02872	0.47199	0.231903	0.418593	0.592484	0.299436	0.385604	4	0.385604	0.999989	1	0.280172	0.350555	0.0305503
2014-06-15	EGX30	8340.4	8744.37	8748.32	8331.94	809450000	-0.0464	-0.0475161	0.0474858	0.0579044	5.87018e-05	0.179071	0.476744	0.658593	0.655664	0.418788	0.552447	4	105.245	0.280172	0	11.358	-1.33	114.286	0.012297	0.0116517	2.63	0.03	0.280172	4.65629	-1.33	0.0116517	0.03	-0.0475161	0.552447	0.366681	0.473636	0.554572	0.405076	0.449991	4	0.449991	0.999992	1	0.280172	0.385604	0.02872
2014-06-22	EGX30	8093.75	8340.4	8382.52	8035.31	548280000	-0.0296	-0.030019	0.0401401	0.0579044	5.47513e-05	0.186549	0.44363	0.576649	0.808482	0.448346	0.569277	4	105.245	0.280172	0	11.518	0.41	113.086	-0.0169921	0.0116125	2.54	-0.09	0.280172	4.65629	0.41	0.0116125	-0.09	-0.030019	0.569277	0.341071	0.410037	0.745387	0.433609	0.482526	4	0.482526	0.999992	1	0.280172	0.449991	-0.0475161
2014-06-29	EGX30	8258.4	8096.82	8270.05	8057.49	385980000	0.0203	0.0201387	0.0373441	0.0579044	5.21755e-05	0.180632	0.422039	0.545459	0.903448	0.424957	0.573976	4	105.245	0.280172	0	10.965	-0.94	110.257	-0.0328549	0.0189922	2.65	0.11	0.280172	4.65629	-0.94	0.0189922	0.11	0.0201387	0.573976	0.324373	0.385829	0.863966	0.411031	0.4963	4	0.4963	0.999992	1	0.280172	0.482526	-0.030019
2014-07-06	EGX30	8457.23	8247.71	8542.18	8225.71	615450000	0.0241	0.0237908	0.0358151	0.0579044	3.8656e-05	0.188527	0.308714	0.528402	0.769179	0.456163	0.515615	4	148.666	0.345411	1	11.926	1.76	107.032	-0.0298975	0.0145066	2.53	-0.12	0.345411	5.0017	1.76	0.0145066	-0.12	0.0237908	0.515615	0.236731	0.372591	0.696312	0.441156	0.436697	4	0.436697	1	1	0.345411	0.4963	0.0201387
2014-07-13	EGX30	8637.84	8458.77	8640.11	8399.46	430080000	0.0214	0.0211309	0.0258988	0.0579044	4.91324e-05	0.188596	0.396531	0.417784	0.877644	0.456439	0.537099	4	148.666	0.345411	1	12.276	-0.02	105.388	0.00245515	0.0132304	2.5	-0.03	0.345411	5.0017	-0.02	0.0132304	-0.03	0.0211309	0.537099	0.304646	0.286737	0.831745	0.441421	0.466137	4	0.466137	1	1	0.345411	0.436697	0.0237908
2014-07-20	EGX30	8744.39	8638.78	8744.39	8469.75	318090000	0.0123	0.0122598	0.0049593	0.0579044	3.85419e-05	0.196339	0.307758	0.188593	0.943172	0.487045	0.481642	4	148.666	0.345411	1	12.22	0.63	106.342	0.0080782	0.0168554	2.48	-0.02	0.345411	5.0017	0.63	0.0168554	-0.02	0.0122598	0.481642	0.235992	0.128224	0.913567	0.470966	0.437187	4	0.437187	1	1	0.345411	0.466137	0.0211309
2014-07-27	EGX30	8826.28	8717.25	8838.17	8717.25	153690000	0.0094	0.00932128	0.00692943	0.0579044	6.06499e-05	0.193909	0.493074	0.206174	1	0.47744	0.544172	4	148.666	0.345411	1	14.63	4.34	105.708	-0.0327119	0.0211395	2.52	0.04	0.345411	5.0017	4.34	0.0211395	0.04	0.00932128	0.544172	0.37931	0.128224	1	0.461694	0.492307	4	0.492307	1	1	0.345411	0.437187	0.0122598
2014-08-03	EGX30	9152.95	8824.75	9180.92	8790.34	814230000	0.037	0.0363426	0.0121392	0.0579044	4.46343e-05	0.183213	0.358826	0.264291	0.652867	0.43516	0.427786	4	200.703	0.300122	1	16.158	-1.26	103.6	-0.000870364	0.0166536	2.44	-0.08	0.300122	5.30182	-1.26	0.0166536	-0.08	0.0363426	0.427786	0.275487	0.167607	0.55108	0.42088	0.353764	4	0.353764	1	1	0.300122	0.492307	0.00932128
2014-08-10	EGX30	9386.57	9152.95	9386.57	9070.79	637220000	0.0255	0.0252037	0.0124587	0.0579044	3.95526e-05	0.17988	0.31623	0.267855	0.756441	0.421983	0.440627	4	200.703	0.300122	1	13.366	-2.62	101.94	-0.0218112	0.021458	2.34	-0.1	0.300122	5.30182	-2.62	0.021458	-0.1	0.0252037	0.440627	0.242544	0.170374	0.680406	0.40816	0.375371	4	0.375371	1	1	0.300122	0.353764	0.0363426
2014-08-17	EGX30	9373.27	9393.39	9497.41	9292.11	640510000	-0.0014	-0.00141792	0.0167242	0.0579044	2.21374e-06	0.182806	0.00324366	0.315437	0.754516	0.433551	0.376687	4	200.703	0.300122	1	11.908	-1.68	99.88	-0.010337	0.0184886	2.4	0.06	0.300122	5.30182	-1.68	0.0184886	0.06	-0.00141792	0.376687	0.000489662	0.207304	0.678002	0.419327	0.326281	4	0.326281	1	1	0.300122	0.375371	0.0252037
2014-08-24	EGX30	9435.05	9372.79	9509.87	9336.52	466710000	0.0066	0.00656946	0.0172146	0.0579044	1.40761e-05	0.189219	0.102678	0.320908	0.856211	0.458899	0.434674	4	200.703	0.300122	1	11.828	0.51	100.644	0.0102381	0.00655129	2.35	-0.05	0.300122	5.30182	0.51	0.00655129	-0.05	0.00656946	0.434674	0.077389	0.21155	0.804983	0.443797	0.38443	4	0.38443	1	1	0.300122	0.326281	-0.00141792
2014-08-31	EGX30	9650.43	9457.62	9666.89	9424.59	5.2479e+08	0.0228	0.022571	0.0127743	0.0579044	4.30096e-05	0.232504	0.345207	0.271375	0.822227	0.629999	0.517202	4	200.703	0.300122	1	12.335	0.11	100.453	-0.0160498	0.0205848	2.46	0.11	0.300122	5.30182	0.11	0.0205848	0.11	0.022571	0.517202	0.264954	0.173106	0.762549	0.608963	0.452393	4	0.452393	1	1	0.300122	0.38443	0.00656946
2014-09-07	EGX30	9475.68	9649.46	9748.78	9440.2	624600000	-0.0181	-0.018274	0.0169925	0.0579044	2.92571e-05	0.200772	0.229929	0.318431	0.763825	0.504566	0.454188	4	220.261	0.0929887	1	13.03	1.22	97.32	-0.032686	0.0238812	2.62	0.16	0.0929887	5.39481	1.22	0.0238812	0.16	-0.018274	0.454188	0.175802	0.209627	0.689626	0.48788	0.390734	4	0.390734	1	1	0.0929887	0.452393	0.022571
2014-09-14	EGX30	9729.1	9476.98	9729.1	9382.82	405510000	0.0267	0.0263929	0.0202983	0.0579044	6.50856e-05	0.209422	0.530256	0.355308	0.892021	0.538758	0.579086	4	220.261	0.0929887	1	12.728	-1.2	97.018	0.00455818	0.0138626	2.59	-0.03	0.0929887	5.39481	-1.2	0.0138626	-0.03	0.0263929	0.579086	0.408065	0.238248	0.849697	0.520886	0.504224	4	0.504224	1	1	0.0929887	0.390734	-0.018274
2014-09-21	EGX30	9697.31	9749.38	9818.98	9667.53	379710000	-0.0033	-0.00327287	0.0213132	0.0579044	8.61939e-06	0.241943	0.0569378	0.366629	0.907117	0.66731	0.499499	4	220.261	0.0929887	1	14.476	2.74	95.01	-0.0174117	0.0172738	2.54	-0.05	0.0929887	5.39481	2.74	0.0172738	-0.05	-0.00327287	0.499499	0.0420151	0.247035	0.868546	0.64498	0.450644	4	0.450644	1	1	0.0929887	0.504224	0.0263929
2014-09-28	EGX30	9727.18	9693.07	9831.18	9591.76	386040000	0.0031	0.0030755	0.0185742	0.0579044	7.96679e-06	0.247644	0.0514676	0.336075	0.903413	0.689848	0.495201	4	220.261	0.0929887	1	15.942	-0.3	93.406	-0.0460594	0.0378873	2.45	-0.09	0.0929887	5.39481	-0.3	0.0378873	-0.09	0.0030755	0.495201	0.0377846	0.223321	0.863922	0.666736	0.447941	4	0.447941	1	1	0.0929887	0.450644	-0.00327287
2014-10-05	EGX30	9552.01	9727.18	9770.16	9527.52	134770000	-0.018	-0.0181724	0.0185373	0.0579044	0.00013484	0.264994	1	0.335664	1	0.75843	0.773523	4	133.039	-0.504172	0	17.554	6.69	90.186	-0.0238505	0.0218213	2.31	-0.14	-0.504172	4.89064	6.69	0.0218213	-0.14	-0.0181724	0.773523	0.860259	0.223002	1	0.73294	0.70405	4	0.70405	1	1	-0.504172	0.447941	0.0030755
2014-10-12	EGX30	8593.51	9538.5	9538.5	8593.51	615550000	-0.1003	-0.105744	0.0506004	0.0773138	0.000171788	0.181545	1	0.79328	0.76912	0.428565	0.747741	4	133.039	-0.504172	0	24.174	0.75	85.498	-0.0389861	0.0366654	2.22	-0.09	-0.504172	4.89064	0.75	0.0366654	-0.09	-0.105744	0.747741	1	0.607274	0.696239	0.414514	0.679507	4	0.679507	1	1	-0.504172	0.70405	-0.0181724
2014-10-19	EGX30	8797.29	8626.1	8821.81	8470.44	642380000	0.0237	0.0234365	0.0568592	0.0773138	3.64838e-05	0.201947	0.290506	0.79328	0.753422	0.509214	0.586606	4	133.039	-0.504172	0	17.032	-5.88	85.582	0.0085246	0.020104	2.29	0.07	-0.504172	4.89064	-5.88	0.020104	0.07	0.0234365	0.586606	0.22265	0.661462	0.676636	0.492367	0.513279	4	0.513279	1	1	-0.504172	0.679507	-0.105744
2014-10-26	EGX30	9115.63	8807.38	9116.65	8606.43	923760000	0.0362	0.0355468	0.0639553	0.0773138	3.84806e-05	0.201152	0.307244	0.79328	0.588778	0.506068	0.548843	4	133.039	-0.504172	0	14.826	-2.08	85.558	-0.0215087	0.0278036	2.35	0.06	-0.504172	4.89064	-2.08	0.0278036	0.06	0.0355468	0.548843	0.235594	0.7229	0.471056	0.48933	0.47972	4	0.47972	1	1	-0.504172	0.513279	0.0234365
2014-11-02	EGX30	9420.75	9149.28	9581.39	9149.28	1250000000	0.0335	0.0329242	0.0683882	0.0773138	2.63393e-05	0.113499	0.205472	0.79328	0.397887	0.159589	0.389057	4	102.122	-0.26447	0	14.116	-0.91	83.036	-0.0115912	0.039314	2.32	-0.03	-0.26447	4.62617	-0.91	0.039314	-0.03	0.0329242	0.389057	0.156887	0.734896	0.232701	0.154866	0.319837	4	0.319837	0.999986	1	-0.26447	0.47972	0.0355468
2014-11-09	EGX30	9260.18	9420.84	9577.3	9220.96	730180000	-0.017	-0.0171912	0.0244728	0.0773138	2.35438e-05	0.123152	0.182039	0.506563	0.702047	0.197748	0.397099	4	102.122	-0.26447	0	13.142	0.19	79.902	-0.0708404	0.0422445	2.32	0	-0.26447	4.62617	0.19	0.0422445	0	-0.0171912	0.397099	0.138765	0.381063	0.612488	0.191701	0.331004	4	0.331004	0.999985	1	-0.26447	0.319837	0.0329242
2014-11-16	EGX30	9258.18	9266.21	9316.1	9121.94	620470000	-0.0002	-0.000216002	0.0257636	0.0773138	3.48126e-07	0.120968	0	0.520962	0.766242	0.189113	0.369079	4	102.122	-0.26447	0	13.658	-0.41	77.622	0.0215693	0.0230658	2.31	-0.01	-0.26447	4.62617	-0.41	0.0230658	-0.01	-0.000216002	0.369079	0	0.392238	0.692644	0.183366	0.317062	4	0.317062	0.999985	1	-0.26447	0.331004	-0.0171912
2014-11-23	EGX30	9325.95	9263.46	9334.24	9051.75	783150000	0.0073	0.00729335	0.0208383	0.0773138	9.31284e-06	0.0941966	0.0627506	0.466019	0.671053	0.0832914	0.320778	4	102.122	-0.26447	0	12.5675	0.43	76.63	-0.0968391	0.078222	2.18	-0.13	-0.26447	4.62617	0.43	0.078222	-0.13	0.00729335	0.320778	0.0465105	0.349596	0.573788	0.0812135	0.262777	4	0.262777	0.999985	1	-0.26447	0.317062	-0.000216002
2014-11-30	EGX30	9458.57	9325.89	9459.15	9157.7	797520000	0.0142	0.0141204	0.0134679	0.0773138	1.77054e-05	0.108033	0.133099	0.383799	0.662645	0.137986	0.329382	4	102.122	-0.26447	0	12.762	-1.51	69.722	-0.0556295	0.0321624	2.31	0.13	-0.26447	4.62617	-1.51	0.0321624	0.13	0.0141204	0.329382	0.100916	0.285783	0.563289	0.134011	0.271	4	0.271	0.999978	1	-0.26447	0.262777	0.00729335
2014-12-07	EGX30	9196.93	9461.79	9578.87	9196.93	893060000	-0.0277	-0.0280515	0.0185092	0.0773138	3.14105e-05	0.138859	0.24798	0.440036	0.606742	0.259837	0.388649	4	88.0173	-0.148638	0	17.758	9.26	64.078	-0.0977101	0.06468	2.1	-0.21	-0.148638	4.47753	9.26	0.06468	-0.21	-0.0280515	0.388649	0.189762	0.32943	0.493486	0.251637	0.316079	4	0.316079	0.999754	1	-0.148638	0.271	0.0141204
2014-12-14	EGX30	8399.89	9168.41	9168.41	8124.68	852010000	-0.0867	-0.0906511	0.0479264	0.0884887	0.000106397	0.107165	0.876539	0.828468	0.630761	0.134553	0.61758	4	88.0173	-0.148638	0	19.346	-4.59	59.774	-0.046466	0.0250567	2.17	0.07	-0.148638	4.47753	-4.59	0.0250567	0.07	-0.0906511	0.61758	0.67587	0.645539	0.523478	0.130697	0.493896	4	0.493896	0.999682	1	-0.148638	0.316079	-0.0280515
2014-12-21	EGX30	8740.12	8500.15	8802.91	8500.15	600830000	0.0405	0.0397053	0.0569449	0.0884887	6.60841e-05	0.146566	0.538625	0.853554	0.777734	0.2903	0.615053	4	88.0173	-0.148638	0	14.73	-1.99	58.6925	-0.00255124	0.0174911	2.25	0.08	-0.148638	4.47753	-1.99	0.0174911	0.08	0.0397053	0.615053	0.414538	0.72362	0.706993	0.281044	0.531549	4	0.531549	0.999683	1	-0.148638	0.493896	-0.0906511
2014-12-28	EGX30	8926.58	8740.44	9052.84	8725.17	511620000	0.0213	0.0211094	0.0582777	0.0884887	4.126e-05	0.149726	0.330542	0.853554	0.829933	0.302792	0.579205	4	88.0173	-0.148638	0	16.9925	3.29	56.0275	-0.0585619	0.0429482	2.12	-0.13	-0.148638	4.47753	3.29	0.0429482	-0.13	0.0211094	0.579205	0.253612	0.73516	0.772171	0.293103	0.513511	4	0.513511	0.999762	1	-0.148638	0.531549	0.0397053
2015-01-04	EGX30	8946.34	8926.26	9033.07	8754.87	336850000	0.0022	0.00221117	0.0578903	0.0884887	6.56425e-06	0.119917	0.039711	0.853554	0.932195	0.18496	0.502605	4	128.774	0.380526	0	18.982	-0.24	49.466	-0.150546	0.0936302	1.98	-0.14	0.380526	4.85806	-0.24	0.0936302	-0.14	0.00221117	0.502605	0.0286924	0.731805	0.899861	0.179357	0.459929	4	0.459929	1	1	0.380526	0.513511	0.0211094
2015-01-11	EGX30	9555.99	8945.69	9623.86	8895.69	570510000	0.0681	0.0659237	0.0271781	0.0884887	0.000115552	0.158444	0.953283	0.597014	0.795475	0.33725	0.670755	4	128.774	0.380526	0	20.996	3.4	46.578	-0.00547255	0.0594991	1.83	-0.15	0.380526	4.85806	3.4	0.0594991	-0.15	0.0659237	0.670755	0.735221	0.465901	0.729145	0.326366	0.564158	4	0.564158	1	1	0.380526	0.459929	0.00221117
2015-01-18	EGX30	9898.86	9555.99	9975.88	9457.91	639950000	0.0359	0.0352514	0.0268595	0.0884887	5.50846e-05	0.126253	0.446424	0.59346	0.754843	0.210005	0.501183	4	128.774	0.380526	0	17.95	-4.29	46.4425	-0.0146702	0.0246041	1.81	-0.02	0.380526	4.85806	-4.29	0.0246041	-0.02	0.0352514	0.501183	0.343232	0.463143	0.678412	0.203533	0.42208	4	0.42208	1	1	0.380526	0.564158	0.0659237
2015-01-25	EGX30	9843.1	9899.5	9978.09	9786.48	380970000	-0.0056	-0.0056489	0.0328494	0.0884887	1.48277e-05	0.132426	0.108978	0.660279	0.90638	0.234409	0.477511	4	128.774	0.380526	0	18.582	4.31	46.764	0.0176207	0.0296624	1.68	-0.13	0.380526	4.85806	4.31	0.0296624	-0.13	-0.0056489	0.477511	0.0822611	0.515003	0.867626	0.22709	0.422995	4	0.422995	1	1	0.380526	0.42208	0.0352514
2015-02-01	EGX30	9965.43	9869.54	10066.1	9779.76	525010000	0.0124	0.0123514	0.0308959	0.0884887	2.3526e-05	0.119988	0.18189	0.638488	0.822098	0.185243	0.45693	4	119.521	-0.0745671	0	17.846	-3.68	54.616	0.162056	0.100934	1.95	0.27	-0.0745671	4.78349	-3.68	0.100934	0.27	0.0123514	0.45693	0.138649	0.49809	0.762388	0.17963	0.394689	4	0.394689	0.999999	1	-0.0745671	0.422995	-0.0056489
2015-02-08	EGX30	9747.36	9965.08	10041.7	9656.45	505310000	-0.0219	-0.0221256	0.0246197	0.0884887	4.37862e-05	0.154665	0.351718	0.568474	0.833625	0.322314	0.519033	4	119.521	-0.0745671	0	16.554	-2.6	56.566	0.076623	0.100548	2.02	0.07	-0.0745671	4.78349	-2.6	0.100548	0.07	-0.0221256	0.519033	0.269989	0.443751	0.776781	0.311948	0.450617	4	0.450617	0.999999	1	-0.0745671	0.394689	0.0123514
2015-02-15	EGX30	9481.2	9739.14	9833.27	9422.4	463010000	-0.0273	-0.0276856	0.0180362	0.0884887	5.97948e-05	0.129161	0.485906	0.495034	0.858376	0.2215	0.515204	4	119.521	-0.0745671	0	15.21	-0.39	60.568	0.0108804	0.0547566	2.13	0.11	-0.0745671	4.78349	-0.39	0.0547566	0.11	-0.0276856	0.515204	0.373766	0.386752	0.807686	0.21463	0.445709	4	0.445709	0.999999	1	-0.0745671	0.450617	-0.0221256
2015-02-22	EGX30	9334.01	9481.54	9673.2	9333.79	433090000	-0.0155	-0.0156462	0.0177795	0.0884887	3.61268e-05	0.122817	0.287514	0.49217	0.875883	0.196424	0.462998	4	119.521	-0.0745671	0	13.868	-0.96	60.632	0.0146487	0.0367884	2	-0.13	-0.0745671	4.78349	-0.96	0.0367884	-0.13	-0.0156462	0.462998	0.220336	0.384529	0.829546	0.190423	0.406209	4	0.406209	0.999999	1	-0.0745671	0.445709	-0.0276856
2015-03-01	EGX30	9575.98	9332.96	9575.98	9259.39	349610000	0.0259	0.0255932	0.0242113	0.0884887	7.32049e-05	0.130141	0.598314	0.563919	0.924729	0.225376	0.578084	4	96.2623	-0.216416	0	14.074	1.86	60.118	-0.045282	0.0475463	2.24	0.24	-0.216416	4.56708	1.86	0.0475463	0.24	0.0255932	0.578084	0.460699	0.440215	0.890538	0.218371	0.502456	4	0.502456	0.999959	1	-0.216416	0.406209	-0.0156462
2015-03-08	EGX30	9640.77	9579.98	9802.13	9575	409170000	0.0068	0.0067431	0.0236752	0.0884887	1.648e-05	0.148661	0.122828	0.557939	0.889879	0.298582	0.467307	4	96.2623	-0.216416	0	16.008	0.8	56.508	-0.0763864	0.0594033	2.13	-0.11	-0.216416	4.56708	0.8	0.0594033	-0.11	0.0067431	0.467307	0.0929723	0.435574	0.847023	0.289038	0.416152	4	0.416152	0.999955	1	-0.216416	0.502456	0.0255932
2015-03-15	EGX30	9518.28	9685.3	9820.21	9471.35	431010000	-0.0127	-0.0127868	0.0191918	0.0884887	2.96671e-05	0.149297	0.233367	0.507925	0.8771	0.301093	0.479871	4	96.2623	-0.216416	0	14.466	-2.98	52.72	-0.0169308	0.0563147	1.93	-0.2	-0.216416	4.56708	-2.98	0.0563147	-0.2	-0.0127868	0.479871	0.17846	0.396757	0.831066	0.291463	0.424436	4	0.424436	0.999955	1	-0.216416	0.416152	0.0067431
2015-03-22	EGX30	9052.5	9517.58	9517.58	8948.75	463000000	-0.0489	-0.0501732	0.0323876	0.0884887	0.000108365	0.126101	0.893041	0.655129	0.858382	0.209404	0.653989	4	96.2623	-0.216416	0	14.668	2.05	55.014	0.0464188	0.053321	1.95	0.02	-0.216416	4.56708	2.05	0.053321	0.02	-0.0501732	0.653989	0.688632	0.511005	0.807694	0.202953	0.552571	4	0.552571	0.999955	1	-0.216416	0.424436	-0.0127868
2015-03-29	EGX30	8891.73	9065.1	9148.52	8891.59	334890000	-0.0178	-0.0179193	0.0236176	0.0845073	5.35081e-05	0.112344	0.433209	0.535822	0.933342	0.155027	0.51435	4	96.2623	-0.216416	0	14.895	-0.4	54.785	-0.0126595	0.0582344	1.85	-0.1	-0.216416	4.56708	-0.4	0.0582344	-0.1	-0.0179193	0.51435	0.333012	0.413194	0.901293	0.150462	0.44949	4	0.44949	0.999957	1	-0.216416	0.552571	-0.0501732
2015-04-05	EGX30	8892.53	8891.73	8892.53	8449.57	520780000	0.0001	8.99672e-05	0.0213716	0.0845073	1.72755e-07	0.118907	0	0.510767	0.824573	0.18097	0.379077	4	100.91	0.0471528	0	13.834	-2.09	56.512	0.0193698	0.0407759	1.96	0.11	0.0471528	4.61423	-2.09	0.0407759	0.11	8.99672e-05	0.379077	0	0.393748	0.765479	0.175505	0.333683	4	0.333683	0.999981	1	0.0471528	0.44949	-0.0179193
2015-04-12	EGX30	8886.84	8898.94	8977.62	8843.29	245190000	-0.0006	-0.000640068	0.0235295	0.0845073	2.6105e-06	0.137607	0.0065694	0.53484	0.985828	0.254885	0.445531	4	100.91	0.0471528	0	13.388	1.31	59.118	0.0760546	0.0382264	1.87	-0.09	0.0471528	4.61423	1.31	0.0382264	-0.09	-0.000640068	0.445531	0.00306169	0.412431	0.966829	0.246857	0.407295	4	0.407295	0.999982	1	0.0471528	0.333683	8.99672e-05
2015-04-19	EGX30	8731.29	8843.31	8880.04	8546.14	390650000	-0.0175	-0.0176584	0.0101166	0.0845073	4.52026e-05	0.140877	0.36359	0.385214	0.900716	0.267814	0.479333	4	100.91	0.0471528	0	12.806	-1.6	61.412	0.0265566	0.0453366	1.93	0.06	0.0471528	4.61423	-1.6	0.0453366	0.06	-0.0176584	0.479333	0.279171	0.296303	0.860554	0.259337	0.423841	4	0.423841	0.999981	1	0.0471528	0.407295	-0.000640068
2015-04-26	EGX30	8672.29	8731.56	8731.75	8317.53	571110000	-0.0068	-0.00678024	0.00820771	0.0845073	1.1872e-05	0.148687	0.0842026	0.36392	0.795124	0.298686	0.385483	4	100.91	0.0471528	0	13.234	0.41	63.494	0.0184127	0.0222329	2.12	0.19	0.0471528	4.61423	0.41	0.0222329	0.19	-0.00678024	0.385483	0.0631009	0.279776	0.728707	0.289138	0.340181	4	0.340181	0.999957	1	0.0471528	0.423841	-0.0176584
2015-05-03	EGX30	8742.42	8668.02	8859.98	8556.07	493550000	0.0081	0.00805415	0.0108107	0.0845073	1.63188e-05	0.171856	0.121477	0.392957	0.840506	0.390266	0.436301	4	86.2335	-0.15717	0	14.06	0.16	65.006	-0.00484565	0.0322751	2.16	0.04	-0.15717	4.45706	0.16	0.0322751	0.04	0.00805415	0.436301	0.0919277	0.302312	0.785373	0.377543	0.389289	4	0.389289	0.999369	1	-0.15717	0.340181	-0.00678024
2015-05-10	EGX30	8303.37	8741.74	8761.38	8301.93	425390000	-0.0502	-0.0515256	0.0253285	0.0845073	0.000121126	0.170044	1	0.554908	0.880388	0.383103	0.7046	4	86.2335	-0.15717	0	13.318	-0.48	64.902	0.01354	0.046708	2.14	-0.02	-0.15717	4.45706	-0.48	0.046708	-0.02	-0.0515256	0.7046	0.771351	0.428007	0.835172	0.370629	0.60129	4	0.60129	0.998785	1	-0.15717	0.389289	0.00805415
2015-05-17	EGX30	8988.03	8303.03	9039.78	8260.92	825310000	0.0825	0.0792322	0.0542633	0.0845073	9.6003e-05	0.0941364	0.789415	0.83208	0.646384	0.0830534	0.587733	4	86.2335	-0.15717	0	12.54	-0.25	64.31	0.000154571	0.0326145	2.21	0.07	-0.15717	4.45706	-0.25	0.0326145	0.07	0.0792322	0.587733	0.608491	0.678522	0.542985	0.0809838	0.477745	4	0.477745	0.997913	1	-0.15717	0.60129	-0.0515256
2015-05-24	EGX30	8912.05	8991.85	9144.25	8912.05	722520000	-0.0085	-0.0084894	0.054417	0.0826403	1.17497e-05	0.0830232	0.0831772	0.82201	0.706529	0.0391248	0.41271	4	86.2335	-0.15717	0	13.62	1.71	61.57	-0.02409	0.0721041	2.12	-0.09	-0.15717	4.45706	1.71	0.0721041	-0.09	-0.0084894	0.41271	0.0623078	0.669592	0.618085	0.0385785	0.347141	4	0.347141	0.996317	1	-0.15717	0.477745	0.0792322
2015-05-31	EGX30	8780.76	8911.02	8953.1	8725.92	488650000	-0.0147	-0.0148413	0.0554382	0.0826403	3.03721e-05	0.0863129	0.239276	0.82201	0.843373	0.0521283	0.489197	4	86.2335	-0.15717	0	14.158	0.37	61.898	-0.0453446	0.0405436	2.41	0.29	-0.15717	4.45706	0.37	0.0405436	0.29	-0.0148413	0.489197	0.18303	0.678434	0.788953	0.051131	0.425387	4	0.425387	0.993196	1	-0.15717	0.347141	-0.0084894
2015-06-07	EGX30	8626.46	8779.11	8779.11	8606.55	438220000	-0.0176	-0.0177287	0.0466194	0.0826403	4.04563e-05	0.100003	0.323805	0.782345	0.872881	0.106242	0.521318	4	79.0009	-0.0876006	0	13.922	-0.43	63.238	0.0458194	0.0445528	2.39	-0.02	-0.0876006	4.36946	-0.43	0.0445528	-0.02	-0.0177287	0.521318	0.248402	0.602081	0.825798	0.103369	0.444912	4	0.444912	0.986988	1	-0.0876006	0.425387	-0.0148413
2015-06-14	EGX30	8576.71	8626.12	8635.15	8512.33	359700000	-0.0058	-0.00578383	0.00552335	0.0826403	1.60796e-05	0.0359386	0.119472	0.323905	0.918825	0	0.340551	4	79.0009	-0.0876006	0	14.37	0.18	60.654	-0.0616835	0.049274	2.26	-0.13	-0.0876006	4.36946	0.18	0.049274	-0.13	-0.00578383	0.340551	0.090377	0.264171	0.883166	0	0.309428	4	0.309428	0.984696	1	-0.0876006	0.444912	-0.0177287
2015-06-21	EGX30	8406.17	8576.37	8611.42	8356.35	319410000	-0.0199	-0.0200844	0.00626234	0.0826403	6.28798e-05	0.0817813	0.511766	0.332149	0.9424	0.0342158	0.455133	4	79.0009	-0.0876006	0	13.228	0.06	60.844	0.0122126	0.0349369	2.49	0.23	-0.0876006	4.36946	0.06	0.0349369	0.23	-0.0200844	0.455133	0.393765	0.264171	0.912603	0.0338397	0.401095	4	0.401095	0.985732	1	-0.0876006	0.309428	-0.00578383
2015-06-28	EGX30	8314.72	8410.65	8534.76	8303.51	409020000	-0.0109	-0.0109385	0.00651321	0.0826403	2.67432e-05	0.0763005	0.208858	0.334947	0.889967	0.0125509	0.361581	4	79.0009	-0.0876006	0	17.49	2.77	60.356	-0.0181213	0.0569817	2.4	-0.09	-0.0876006	4.36946	2.77	0.0569817	-0.09	-0.0109385	0.361581	0.159505	0.264171	0.847132	0.0129261	0.320934	4	0.320934	0.990363	1	-0.0876006	0.401095	-0.0200844
2015-07-05	EGX30	7617.39	8328.41	8391.05	7527.08	501790000	-0.0839	-0.0875936	0.0381238	0.094663	0.000174562	0.0401603	1	0.752419	0.835685	0	0.647026	4	104.282	0.277637	0	17.912	0.04	56.632	-0.0229501	0.06864	2.42	0.02	0.277637	4.6471	0.04	0.06864	0.02	-0.0875936	0.647026	1	0.594602	0.779353	0	0.593489	4	0.593489	0.99977	1	0.277637	0.320934	-0.0109385
2015-07-12	EGX30	8022.91	7619.82	8023.3	7586.69	525460000	0.0532	0.0518674	0.0570732	0.094663	9.87086e-05	0.127463	0.812094	0.886856	0.821835	0.214787	0.683893	4	104.282	0.277637	0	12.912	-4.88	57.172	-0.0234892	0.0182331	2.34	-0.08	0.277637	4.6471	-4.88	0.0182331	-0.08	0.0518674	0.683893	0.62603	0.758665	0.76206	0.20815	0.588726	4	0.588726	0.999985	1	0.277637	0.593489	-0.0875936
2015-07-19	EGX30	8087.24	8024.29	8087.41	8020.42	235450000	0.008	0.00798631	0.0582303	0.094663	3.39194e-05	0.0876212	0.26901	0.886856	0.991527	0.0573002	0.551173	4	104.282	0.277637	0	12.594	1.79	55.754	-0.0377744	0.0309482	2.27	-0.07	0.277637	4.6471	1.79	0.0309482	-0.07	0.00798631	0.551173	0.206025	0.768683	0.973945	0.0561236	0.501194	4	0.501194	0.999987	1	0.277637	0.588726	0.0518674
2015-07-26	EGX30	8191.53	8092.62	8197.61	7875.58	738450000	0.0129	0.0128132	0.0592597	0.094663	1.73515e-05	0.0937638	0.130133	0.886856	0.697208	0.0815807	0.448944	4	104.282	0.277637	0	13.158	-1.62	54.136	-0.0185914	0.0225282	2.2	-0.07	0.277637	4.6471	-1.62	0.0225282	-0.07	0.0128132	0.448944	0.0986219	0.777596	0.606446	0.0795621	0.390556	4	0.390556	0.999872	1	0.277637	0.501194	0.00798631
2015-08-02	EGX30	8114.08	8193.08	8217.95	8076.59	563040000	-0.0095	-0.00949987	0.0258903	0.094663	1.68725e-05	0.102652	0.126118	0.615951	0.799846	0.116714	0.414657	4	86.8672	-0.182715	0	13.046	1.27	48.59	-0.114177	0.0789194	2.18	-0.02	-0.182715	4.46438	1.27	0.0789194	-0.02	-0.00949987	0.414657	0.0955167	0.488685	0.734603	0.113477	0.358071	4	0.358071	0.994803	1	-0.182715	0.390556	0.0128132
2015-08-09	EGX30	7879.82	8119.09	8121.23	7879.82	520860000	-0.0289	-0.0292958	0.0191092	0.094663	5.6245e-05	0.125805	0.456151	0.540306	0.824526	0.208234	0.507304	4	86.8672	-0.182715	0	13.174	-0.56	47.944	0.00524495	0.0334849	2.2	0.02	-0.182715	4.46438	-0.56	0.0334849	0.02	-0.0292958	0.507304	0.350754	0.429975	0.76542	0.201823	0.436993	4	0.436993	0.984109	1	-0.182715	0.358071	-0.00949987
2015-08-16	EGX30	7172.63	7879.49	7879.49	7137.61	819700000	-0.0897	-0.0940327	0.0460214	0.0968094	0.000114716	0.108926	0.946273	0.852096	0.649667	0.141515	0.647388	4	86.8672	-0.182715	0	17.846	15.2	45.998	-0.0862698	0.0509829	2.05	-0.15	-0.182715	4.46438	15.2	0.0509829	-0.15	-0.0940327	0.647388	0.7298	0.674775	0.547084	0.137418	0.522269	4	0.522269	0.960583	1	-0.182715	0.436993	-0.0292958
2015-08-23	EGX30	7078.83	7135.04	7135.04	6641.29	868600000	-0.0131	-0.0131638	0.0393086	0.0968094	1.51551e-05	0.104394	0.111723	0.777213	0.621054	0.123599	0.408397	4	86.8672	-0.182715	0	31.846	-1.98	43.528	0.0900292	0.111904	2.19	0.14	-0.182715	4.46438	-1.98	0.111904	0.14	-0.0131638	0.408397	0.084384	0.616657	0.511357	0.120123	0.33313	4	0.33313	0.908364	1	-0.182715	0.522269	-0.0940327
2015-08-30	EGX30	7295.96	7087.48	7298.88	7011.07	805000000	0.0307	0.0302121	0.0515189	0.0968094	3.75306e-05	0.0895312	0.299281	0.898432	0.658268	0.0648499	0.480208	4	86.8672	-0.182715	0	27.866	1.75	48.8675	0.0128419	0.0729295	2.13	-0.06	-0.182715	4.46438	1.75	0.0729295	-0.06	0.0302121	0.480208	0.229436	0.722372	0.557824	0.0634116	0.393261	4	0.393261	0.792254	1	-0.182715	0.33313	-0.0131638
2015-09-06	EGX30	7039.33	7295.69	7324.29	6920.73	767360000	-0.0352	-0.0358078	0.0517361	0.0968094	4.66636e-05	0.111793	0.375836	0.898432	0.680292	0.152848	0.526852	4	77.3603	-0.115906	0	24.675	-4.6	47.596	-0.0360399	0.0738093	2.2	0.07	-0.115906	4.34847	-4.6	0.0738093	0.07	-0.0358078	0.526852	0.288642	0.724253	0.585324	0.148358	0.436644	4	0.436644	0.533983	1	-0.115906	0.393261	0.0302121
2015-09-13	EGX30	7267.52	7037.25	7279	7014.64	621820000	0.0324	0.0319021	0.0333807	0.0968094	5.13044e-05	0.172567	0.414737	0.711086	0.765452	0.393076	0.571088	4	77.3603	-0.115906	0	22.312	-0.92	47.336	0.00870956	0.0812754	2.13	-0.07	-0.115906	4.34847	-0.92	0.0812754	-0.07	0.0319021	0.571088	0.318726	0.565333	0.691658	0.380256	0.488993	4	0.488993	0.414185	0	0	0.436644	-0.0358078
2015-09-20	EGX30	7346.54	7267.28	7371.5	7212.68	260490000	0.0109	0.0108143	0.0315445	0.0968094	4.15154e-05	0.16534	0.332683	0.690603	0.976876	0.364512	0.591168	4	77.3603	-0.115906	0	22.36	1.34	47.334	0	0.0405199	2.17	0.04	-0.115906	4.34847	1.34	0.0405199	0.04	0.0108143	0.591168	0.255268	0.549436	0.95565	0.352682	0.528259	4	0.528259	0.359575	0	0	0.488993	0.0319021
2015-09-27	EGX30	7310.71	7347.19	7427.25	7310.71	547860000	-0.0049	-0.00488906	0.0285177	0.0968094	8.92392e-06	0.243314	0.0594905	0.656837	0.808728	0.672729	0.549446	4	77.3603	-0.115906	0	24.49	-2.68	46.988	-0.0155604	0.0472613	1.99	-0.18	-0.115906	4.34847	-2.68	0.0472613	-0.18	-0.00488906	0.549446	0.0439893	0.52323	0.745694	0.650211	0.490781	4	0.490781	0.336746	0	0	0.528259	0.0108143
2015-10-04	EGX30	7491.67	7311.55	7491.67	7238.93	555760000	0.0248	0.0244513	0.0161947	0.0968094	4.39962e-05	0.260979	0.353478	0.51937	0.804105	0.742556	0.604877	4	75.6974	-0.0217302	0	18.368	-3.86	51.332	0.112254	0.0719778	2.12	0.13	-0.0217302	4.32674	-3.86	0.0719778	0.13	0.0244513	0.604877	0.27135	0.416538	0.739922	0.717617	0.536357	4	0.536357	0.331732	0	0	0.490781	-0.00488906
2015-10-11	EGX30	7594.45	7502.33	7678.91	7497.37	1010000000	0.0137	0.013626	0.0121152	0.0907591	1.34911e-05	0.250023	0.0977738	0.441229	0.538317	0.699251	0.444143	4	75.6974	-0.0217302	0	16.594	-2.03	48.994	-0.0617774	0.0535937	2.04	-0.08	-0.0217302	4.32674	-2.03	0.0535937	-0.08	0.013626	0.444143	0.0735964	0.347966	0.408048	0.675813	0.376356	4	0.376356	0.34756	0	0	0.536357	0.0244513
2015-10-18	EGX30	7611.03	7597.19	7715.92	7518.08	1200000000	0.0022	0.00218079	0.0129029	0.0907591	1.81733e-06	0.256887	0	0.450016	0.427143	0.726383	0.400885	4	75.6974	-0.0217302	0	15.268	-0.59	46.81	-0.0558617	0.0334895	2.09	0.05	-0.0217302	4.32674	-0.59	0.0334895	0.05	0.00218079	0.400885	0	0.354786	0.269231	0.702004	0.331505	4	0.331505	0.402453	0	0	0.376356	0.013626
2015-10-25	EGX30	7507.89	7613.93	7664.76	7466.91	1580000000	-0.0136	-0.013644	0.0163031	0.0907591	8.63547e-06	0.262459	0.0570727	0.487947	0.204795	0.748409	0.374556	4	75.6974	-0.0217302	0	14.946	0.61	47.15	0.036059	0.0507613	2.16	0.07	-0.0217302	4.32674	0.61	0.0507613	0.07	-0.013644	0.374556	0.0421194	0.384225	0	0.723267	0.287403	4	0.287403	0.559615	1	-0.0217302	0.331505	0.00218079
2015-11-01	EGX30	7541.72	7484.44	7541.72	7382.8	1060000000	0.0045	0.00449581	0.0113389	0.0907591	4.24133e-06	0.254052	0.0202395	0.432569	0.509061	0.715174	0.419261	4	236.977	1.14122	1	14.716	-0.74	47.23	-0.040605	0.0326655	2.34	0.18	1.14122	5.46796	-0.74	0.0326655	0.18	0.00449581	0.419261	0.0136338	0.341245	0.371517	0.691184	0.354395	4	0.354395	1	1	1.14122	0.287403	-0.013644
2015-11-08	EGX30	6806.67	7520.86	7520.86	6780.62	1190000000	-0.0975	-0.102547	0.0507566	0.0957437	8.61742e-05	0.319128	0.707027	0.892685	0.432994	0.97241	0.751279	4	236.977	1.14122	1	17.264	5.75	44.752	-0.0934027	0.0809871	2.28	-0.06	1.14122	5.46796	5.75	0.0809871	-0.06	-0.102547	0.751279	0.544774	0.709916	0.276537	0.9395	0.617682	4	0.617682	1	1	1.14122	0.354395	0.00449581
2015-11-15	EGX30	6568.97	6745.89	6745.89	6302.05	1210000000	-0.0349	-0.035546	0.0467825	0.0957437	2.93768e-05	0.268666	0.230933	0.854839	0.421292	0.772944	0.570002	4	236.977	1.14122	1	17.262	-4.61	41.544	0.0120754	0.0520245	2.26	-0.02	1.14122	5.46796	-4.61	0.0520245	-0.02	-0.035546	0.570002	0.176578	0.675508	0.261925	0.746952	0.465241	4	0.465241	1	1	1.14122	0.617682	-0.102547
2015-11-22	EGX30	6427.82	6567.77	6642.46	6320.01	1200000000	-0.0215	-0.0217216	0.0456088	0.0957437	1.81013e-05	0.275972	0.136419	0.841746	0.427143	0.801824	0.551783	4	236.977	1.14122	1	15.465	-0.35	43.652	0.0135579	0.0386984	2.22	-0.04	1.14122	5.46796	-0.35	0.0386984	-0.04	-0.0217216	0.551783	0.103483	0.665347	0.269231	0.77483	0.453223	4	0.453223	1	1	1.14122	0.465241	-0.035546
2015-11-29	EGX30	6779.28	6426.28	6790.43	6341.47	1220000000	0.0547	0.0532355	0.0638892	0.0957437	4.36356e-05	0.221354	0.350455	0.892685	0.41544	0.585924	0.561126	4	236.977	1.14122	1	15.926	-0.31	42.412	-0.0385801	0.0365307	2.28	0.06	1.14122	5.46796	-0.31	0.0365307	0.06	0.0532355	0.561126	0.269012	0.823617	0.254619	0.566416	0.478416	4	0.478416	1	1	1.14122	0.453223	-0.0217216
2015-12-06	EGX30	6637.91	6779.28	6897.14	6585.3	1000000000	-0.0209	-0.0210737	0.0402322	0.0957437	2.10737e-05	0.228898	0.161334	0.781768	0.544168	0.615744	0.525754	4	165.745	-0.357511	1	19.356	9.58	38.762	-0.113599	0.0635096	2.13	-0.15	-0.357511	5.11045	9.58	0.0635096	-0.15	-0.0210737	0.525754	0.122752	0.618796	0.415354	0.595202	0.438026	4	0.438026	1	1	-0.357511	0.478416	0.0532355
2015-12-13	EGX30	6669.8	6566.79	6678.21	6376.31	1140000000	0.0048	0.00479272	0.0351895	0.0947245	4.20414e-06	0.223653	0.0199278	0.720018	0.462251	0.595012	0.449302	4	165.745	-0.357511	1	20.236	-3.69	36.836	-0.00623731	0.0445494	2.19	0.06	-0.357511	5.11045	-3.69	0.0445494	0.06	0.00479272	0.449302	0.0133927	0.569536	0.313068	0.57519	0.367797	4	0.367797	1	1	-0.357511	0.438026	-0.0210737
2015-12-20	EGX30	6812.65	6662.11	6824.17	6636.81	954760000	0.0214	0.0211913	0.0311177	0.0947245	2.21954e-05	0.25124	0.170737	0.674596	0.570639	0.704062	0.530008	4	165.745	-0.357511	1	16.6525	-4.96	35.9025	0.012436	0.0575723	2.25	0.06	-0.357511	5.11045	-4.96	0.0575723	0.06	0.0211913	0.530008	0.130024	0.534282	0.448407	0.680458	0.448293	4	0.448293	1	1	-0.357511	0.367797	0.00479272
2015-12-27	EGX30	7006.01	6811.23	7030.08	6694.47	1130000000	0.0284	0.0279872	0.021824	0.0947245	2.47674e-05	0.263637	0.192296	0.570922	0.468102	0.753062	0.496096	4	165.745	-0.357511	1	17.1225	2.47	36.5475	-0.0165248	0.0430702	2.27	0.02	-0.357511	5.11045	2.47	0.0430702	0.02	0.0279872	0.496096	0.146697	0.453818	0.320374	0.727759	0.412162	4	0.412162	1	1	-0.357511	0.448293	0.0211913
2016-01-03	EGX30	6922.71	7007.04	7113.95	6916.01	647110000	-0.0119	-0.011961	0.0178622	0.0947245	1.84838e-05	0.2818	0.139624	0.526727	0.750654	0.824859	0.560466	4	142.421	-0.151668	1	22.526	8.8	34.194	-0.144952	0.0792599	2.13	-0.14	-0.151668	4.95879	8.8	0.0792599	-0.14	-0.011961	0.560466	0.105962	0.419517	0.67318	0.797066	0.498931	4	0.498931	1	1	-0.151668	0.412162	0.0279872
2016-01-10	EGX30	5857.7	6825.52	6825.52	5857.7	1170000000	-0.1538	-0.16705	0.0914095	0.12121	0.000142778	0.353829	1	1	0.444697	1	0.861174	4	142.421	-0.151668	1	24.592	0.01	29.1	-0.0949945	0.0636464	2.03	-0.1	-0.151668	4.95879	0.01	0.0636464	-0.1	-0.16705	0.861174	0.911716	0.976147	0.29115	1	0.794753	4	0.794753	1	1	-0.151668	0.498931	-0.011961
2016-01-17	EGX30	5713.35	5852.47	6132.48	5526.02	1160000000	-0.0246	-0.0249515	0.0850742	0.12121	2.15099e-05	0.354115	0.16499	1	0.450548	1	0.653885	4	142.421	-0.151668	1	25.6675	-4.68	27.756	0.056039	0.135877	2.07	0.04	-0.151668	4.95879	-4.68	0.135877	0.04	-0.0249515	0.653885	0.12558	0.976147	0.298456	1	0.600046	4	0.600046	1	1	-0.151668	0.794753	-0.16705
2016-01-24	EGX30	5986.78	5887.09	6001.86	5799	706520000	0.0479	0.0467482	0.0906968	0.12121	6.61668e-05	0.360872	0.539319	1	0.715891	1	0.813802	4	142.421	-0.151668	1	22.476	-2.14	31.748	0.0843267	0.0628898	1.94	-0.13	-0.151668	4.95879	-2.14	0.0628898	-0.13	0.0467482	0.813802	0.415074	0.976147	0.629775	1	0.755249	4	0.755249	1	1	-0.151668	0.600046	-0.0249515
2016-01-31	EGX30	6202.22	6101.17	6208.71	5895.67	867430000	0.036	0.0353536	0.0982245	0.12121	4.07567e-05	0.37529	0.326323	1	0.621739	1	0.737015	4	142.421	-0.151668	1	21.766	3.18	32.184	-0.024127	0.069571	1.86	-0.08	-0.151668	4.95879	3.18	0.069571	-0.08	0.0353536	0.737015	0.25035	0.976147	0.512211	1	0.684677	4	0.684677	1	1	-0.151668	0.755249	0.0467482
2016-02-07	EGX30	5813.72	6201.28	6261.31	5813.54	787850000	-0.0626	-0.0646867	0.0523705	0.12121	8.21053e-05	0.331896	0.67292	1	0.668303	1	0.835306	4	89.62	-0.463207	0	26.474	2.02	30.41	-0.0171477	0.116531	1.74	-0.12	-0.463207	4.49558	2.02	0.116531	-0.12	-0.0646867	0.835306	0.518397	0.86385	0.570354	0.98822	0.735205	4	0.735205	0.999838	1	-0.463207	0.684677	0.0353536
2016-02-14	EGX30	5944.47	5826.07	5965.39	5753.67	727410000	0.0225	0.0222407	0.0507318	0.12121	3.05752e-05	0.305137	0.240979	1	0.703668	0.917106	0.715438	4	89.62	-0.463207	0	22.1475	-4.87	32.29	-0.00441224	0.0843633	1.76	0.02	-0.463207	4.49558	-4.87	0.0843633	0.02	0.0222407	0.715438	0.184347	0.849662	0.614512	0.886114	0.633659	4	0.633659	0.999795	1	-0.463207	0.735205	-0.0646867
2016-02-21	EGX30	6079.13	5945.34	6122.19	5945	709740000	0.0227	0.0224002	0.0460871	0.12121	3.15612e-05	0.326107	0.249243	0.954397	0.714007	1	0.729412	4	89.62	-0.463207	0	20	-0.72	33.116	0.121776	0.123871	1.76	0	-0.463207	4.49558	-0.72	0.123871	0	0.0224002	0.729412	0.190738	0.809449	0.627422	0.966134	0.648436	4	0.648436	0.999792	1	-0.463207	0.633659	0.0222407
2016-02-28	EGX30	6089.34	6079.81	6185.21	6034.21	599320000	0.0017	0.00167811	0.0412281	0.12121	2.80002e-06	0.320651	0.00815805	0.900193	0.778617	0.978432	0.66635	4	89.62	-0.463207	0	17.78	-2.95	36.278	0.05044	0.0570152	1.88	0.12	-0.463207	4.49558	-2.95	0.0570152	0.12	0.00167811	0.66635	0.0042903	0.767379	0.708096	0.945314	0.60627	4	0.60627	0.999823	1	-0.463207	0.648436	0.0224002
2016-03-06	EGX30	6563.65	6095.56	6572.18	6095.56	1230000000	0.0779	0.0750071	0.0313331	0.12121	6.09814e-05	0.289153	0.495853	0.789812	0.409589	0.853923	0.637294	4	96.4277	0.0732146	0	17.782	-0.36	39.296	0.0467496	0.0651348	1.98	0.1	0.0732146	4.56879	-0.36	0.0651348	0.1	0.0750071	0.637294	0.381459	0.68171	0.247313	0.825122	0.533901	4	0.533901	0.999944	1	0.0732146	0.60627	0.00167811
2016-03-13	EGX30	7485.69	6570.94	7488.74	6562.78	2330000000	0.1405	0.131446	0.0580878	0.12121	5.64147e-05	0.320961	0.457574	1	0	0.979655	0.609307	4	96.4277	0.0732146	0	15.442	-2.48	38.496	-0.0038134	0.0504263	1.88	-0.1	0.0732146	4.56879	-2.48	0.0504263	-0.1	0.131446	0.609307	0.351855	0.91335	0	0.946494	0.552925	4	0.552925	0.999954	1	0.0732146	0.533901	0.0750071
2016-03-20	EGX30	7548.22	7514.89	7608.7	7363.61	1820000000	0.0084	0.00831858	0.0612741	0.12121	4.57065e-06	0.316939	0.023	1	0.064364	0.96376	0.512781	4	96.4277	0.0732146	0	14.41	0.72	39.405	-0.0239733	0.0502473	1.91	0.03	0.0732146	4.56879	0.72	0.0502473	0.03	0.00831858	0.512781	0.0157686	0.940937	0	0.93115	0.471964	4	0.471964	0.999949	1	0.0732146	0.552925	0.131446
2016-03-27	EGX30	7524.99	7560.48	7628.06	7422.17	1820000000	-0.0031	-0.00308229	0.0626625	0.12121	1.69357e-06	0.316897	0	1	0.064364	0.963592	0.506989	4	96.4277	0.0732146	0	13.934	-1.64	37	-0.0511148	0.0430502	1.79	-0.12	0.0732146	4.56879	-1.64	0.0430502	-0.12	-0.00308229	0.506989	0	0.952957	0	0.930988	0.470986	4	0.470986	0.999877	1	0.0732146	0.471964	0.00831858
2016-04-03	EGX30	7478.74	7550.21	7685.57	7408.89	1450000000	-0.0061	-0.00616515	0.0661719	0.12121	4.25183e-06	0.320971	0.0203276	1	0.280861	0.979697	0.570221	4	84.6962	-0.129722	0	15.03	2.26	37.512	0.111356	0.106817	1.72	-0.07	-0.129722	4.43907	2.26	0.106817	-0.07	-0.00616515	0.570221	0.0137018	0.976147	0.0865777	0.946535	0.50574	4	0.50574	0.999067	1	-0.129722	0.470986	-0.00308229
2016-04-10	EGX30	7463.1	7508.25	7545.67	7275.55	909000000	-0.0021	-0.00209345	0.00629305	0.12121	2.30303e-06	0.317548	0.00399209	0.510481	0.597415	0.966167	0.519514	4	84.6962	-0.129722	0	14.458	-1.74	42.35	0.0148729	0.0572689	1.76	0.04	-0.129722	4.43907	-1.74	0.0572689	0.04	-0.00209345	0.519514	0.00106847	0.476147	0.48184	0.933473	0.473132	4	0.473132	0.998455	1	-0.129722	0.50574	-0.00616515
2016-04-17	EGX30	7781.45	7468.08	7918.88	7468.08	1430000000	0.0427	0.0417718	0.022842	0.12121	2.92111e-05	0.314065	0.229544	0.69509	0.292564	0.952396	0.542398	4	84.6962	-0.129722	0	13.408	-0.4	43.04	0.0621609	0.0364957	1.89	0.13	-0.129722	4.43907	-0.4	0.0364957	0.13	0.0417718	0.542398	0.175503	0.608194	0.10119	0.920181	0.451267	4	0.451267	0.997922	1	-0.129722	0.473132	-0.00209345
2016-04-24	EGX30	7773.23	7780.69	7993.98	7702.22	697860000	-0.0011	-0.00105692	0.0225465	0.12121	1.51451e-06	0.303519	0	0.691794	0.720959	0.910711	0.580866	4	84.6962	-0.129722	0	14.546	2.48	44.464	0.0372769	0.0455056	1.83	-0.06	-0.129722	4.43907	2.48	0.0455056	-0.06	-0.00105692	0.580866	0	0.605636	0.636102	0.879941	0.53042	4	0.53042	0.997365	1	-0.129722	0.451267	0.0417718
2016-05-01	EGX30	7547.49	7774.91	7791.31	7429.64	505130000	-0.029	-0.0294707	0.0294277	0.12121	5.83428e-05	0.294248	0.473736	0.768556	0.83373	0.874066	0.737522	4	83.0017	-0.02021	0	15.392	-0.98	44.196	-0.0230507	0.0686204	1.79	-0.04	-0.02021	4.41886	-0.98	0.0686204	-0.04	-0.0294707	0.737522	0.364354	0.665213	0.776913	0.844566	0.662761	4	0.662761	0.996674	1	-0.02021	0.53042	-0.00105692
2016-05-08	EGX30	7520.52	7546.1	7684.92	7491.56	669370000	-0.0036	-0.00357977	0.0295108	0.12121	5.34797e-06	0.291319	0.0295158	0.769482	0.737629	0.862489	0.599779	4	83.0017	-0.02021	0	14.468	0.32	45.2	0.053477	0.0785512	1.71	-0.08	-0.02021	4.41886	0.32	0.0785512	-0.08	-0.00357977	0.599779	0.0208077	0.665932	0.656917	0.833391	0.544262	4	0.544262	0.996432	1	-0.02021	0.662761	-0.0294707
2016-05-15	EGX30	7499.49	7515.69	7670.21	7326.95	846690000	-0.0028	-0.00280027	0.013537	0.12121	3.30731e-06	0.28699	0.0124103	0.59129	0.633874	0.845373	0.520737	4	83.0017	-0.02021	0	15.546	0.16	48.336	0.0311773	0.059815	1.85	0.14	-0.02021	4.41886	0.16	0.059815	0.14	-0.00280027	0.520737	0.00757887	0.527632	0.527364	0.816868	0.469861	4	0.469861	0.996632	1	-0.02021	0.544262	-0.00357977
2016-05-22	EGX30	7531.15	7501.47	7562.57	7414.29	686110000	0.0042	0.00421273	0.0147951	0.12121	6.14003e-06	0.26518	0.0361551	0.605325	0.727834	0.759163	0.532119	4	83.0017	-0.02021	0	14.138	-2.08	48.734	0.0112671	0.0278311	1.85	0	-0.02021	4.41886	-2.08	0.0278311	0	0.00421273	0.532119	0.0259423	0.538525	0.644686	0.733648	0.4857	4	0.4857	0.99728	1	-0.02021	0.469861	-0.00280027
2016-05-29	EGX30	7617.88	7528.82	7632.77	7450.02	643180000	0.0115	0.0114504	0.00702307	0.12121	1.78027e-05	0.295335	0.133916	0.518625	0.752953	0.87836	0.570963	4	83.0017	-0.02021	0	13.8725	0.35	48.905	-0.0120916	0.0157286	1.71	-0.14	-0.02021	4.41886	0.35	0.0157286	-0.14	0.0114504	0.570963	0.101547	0.476147	0.676052	0.848711	0.525614	4	0.525614	0.998392	1	-0.02021	0.4857	0.00421273
2016-06-05	EGX30	7756.3	7617.88	7815.89	7559.02	665100000	0.0182	0.0180073	0.00899483	0.12121	2.70746e-05	0.272344	0.211635	0.540621	0.740127	0.787481	0.569966	4	121.129	0.377997	0	14.69	3.56	49.944	0.0244411	0.0324508	1.64	-0.07	0.377997	4.79686	3.56	0.0324508	-0.07	0.0180073	0.569966	0.161653	0.488306	0.660037	0.760984	0.517745	4	0.517745	0.999998	1	0.377997	0.525614	0.0114504
2016-06-12	EGX30	7420.39	7750.62	7750.62	7386.68	693540000	-0.0433	-0.0442738	0.0283148	0.12121	6.38374e-05	0.258898	0.519793	0.756141	0.723486	0.734331	0.683438	4	121.129	0.377997	0	20.078	2.38	47.388	-0.0650484	0.0543005	1.62	-0.02	0.377997	4.79686	2.38	0.0543005	-0.02	-0.0442738	0.683438	0.399973	0.655577	0.639258	0.709677	0.601121	4	0.601121	0.999999	1	0.377997	0.517745	0.0180073
2016-06-19	EGX30	7253.31	7423.46	7453.58	7153.08	570090000	-0.0225	-0.0227737	0.0293311	0.12121	3.99476e-05	0.257061	0.31954	0.767478	0.79572	0.727069	0.652452	4	121.129	0.377997	0	20.206	6.35	48.122	0.00257345	0.0614104	1.57	-0.05	0.377997	4.79686	6.35	0.0614104	-0.05	-0.0227737	0.652452	0.245104	0.664376	0.729452	0.702667	0.5854	4	0.5854	0.999999	1	0.377997	0.601121	-0.0442738
2016-06-26	EGX30	6942.52	6962.26	6991.36	6831.59	491670000	-0.0428	-0.0437931	0.0292484	0.12121	8.90701e-05	0.266257	0.731301	0.766556	0.841606	0.763421	0.775721	4	121.129	0.377997	0	17.928	-10.99	47.092	0.0203526	0.0637948	1.46	-0.11	0.377997	4.79686	-10.99	0.0637948	-0.11	-0.0437931	0.775721	0.563547	0.66366	0.786747	0.737759	0.687928	4	0.687928	0.999999	1	0.377997	0.5854	-0.0227737
2016-07-03	EGX30	7182.8	6944.2	7182.8	6944.2	254220000	0.0346	0.0340245	0.0368742	0.12121	0.000133839	0.259317	1	0.851624	0.980545	0.735988	0.892039	4	128.345	0.0578672	0	14.625	-1.57	45.964	-0.0677195	0.0602411	1.37	-0.09	0.0578672	4.85473	-1.57	0.0602411	-0.09	0.0340245	0.892039	0.853765	0.729684	0.960231	0.711276	0.813739	4	0.813739	1	1	0.0578672	0.687928	-0.0437931
2016-07-10	EGX30	7583.06	7303.41	7645.95	7303.18	1070000000	0.0557	0.0542275	0.0462501	0.12121	5.06799e-05	0.31521	0.409503	0.956215	0.503209	0.956926	0.706463	4	128.345	0.0578672	0	13.124	-0.53	45.538	0.0378983	0.0807847	1.6	0.23	0.0578672	4.85473	-0.53	0.0807847	0.23	0.0542275	0.706463	0.314678	0.810859	0.364211	0.924553	0.603575	4	0.603575	1	1	0.0578672	0.813739	0.0340245
2016-07-17	EGX30	7436.87	7582.42	7709.36	7432.64	759490000	-0.0193	-0.0194668	0.0456031	0.12121	2.56313e-05	0.308238	0.199537	0.948998	0.684897	0.929365	0.690699	4	128.345	0.0578672	0	12.188	-0.65	45.22	-0.0444321	0.0326946	1.57	-0.03	0.0578672	4.85473	-0.65	0.0326946	-0.03	-0.0194668	0.690699	0.152297	0.805258	0.591074	0.897948	0.611644	4	0.611644	1	1	0.0578672	0.603575	0.0542275
2016-07-24	EGX30	8030.85	7437.15	8031.49	7437.15	918090000	0.0799	0.0768403	0.04115	0.12121	8.36958e-05	0.277189	0.686253	0.899322	0.592096	0.806634	0.746076	4	128.345	0.0578672	0	12.668	-0.15	42.546	-0.0819281	0.0406285	1.46	-0.11	0.0578672	4.85473	-0.15	0.0406285	-0.11	0.0768403	0.746076	0.528708	0.766704	0.475199	0.779473	0.637521	4	0.637521	1	1	0.0578672	0.611644	-0.0194668
2016-07-31	EGX30	8255.36	8029.22	8263.68	7915.85	964530000	0.028	0.0275723	0.0414002	0.12121	2.85863e-05	0.265239	0.224307	0.902113	0.564923	0.759396	0.612685	4	128.345	0.0578672	0	12.496	-0.48	40.884	0.0410967	0.0394877	1.59	0.13	0.0578672	4.85473	-0.48	0.0394877	0.13	0.0275723	0.612685	0.171453	0.76887	0.441269	0.733873	0.528866	4	0.528866	1	1	0.0578672	0.637521	0.0768403
2016-08-07	EGX30	8377.71	8249.78	8388.07	8196.27	1800000000	0.0148	0.0147119	0.0399046	0.12121	8.17329e-06	0.218794	0.0531985	0.88543	0.0760665	0.575805	0.397625	4	104.316	-0.207299	0	11.688	0.16	43.63	0.0605277	0.060987	1.51	-0.08	-0.207299	4.64743	0.16	0.060987	-0.08	0.0147119	0.397625	0.0391232	0.755921	0	0.556648	0.337923	4	0.337923	0.99999	1	-0.207299	0.528866	0.0275723
2016-08-14	EGX30	8317.17	8377.71	8481.13	8277.15	1040000000	-0.0072	-0.00725255	0.0356131	0.111428	6.97361e-06	0.217248	0.0431424	0.814836	0.520763	0.569694	0.487109	4	104.316	-0.207299	0	11.882	-0.21	48.602	0.0904224	0.054911	1.58	0.07	-0.207299	4.64743	-0.21	0.054911	0.07	-0.00725255	0.487109	0.0313461	0.665004	0.386129	0.55075	0.408307	4	0.408307	0.99999	1	-0.207299	0.337923	0.0147119
2016-08-21	EGX30	8131.49	8316.41	8405.99	8131.49	656500000	-0.0223	-0.0225779	0.0223626	0.111428	3.43913e-05	0.20713	0.272966	0.667023	0.74516	0.529699	0.553712	4	104.316	-0.207299	0	13.076	2.31	48.654	0.00545181	0.0519917	1.62	0.04	-0.207299	4.64743	2.31	0.0519917	0.04	-0.0225779	0.553712	0.209085	0.550282	0.66632	0.512141	0.484457	4	0.484457	0.99999	1	-0.207299	0.408307	-0.00725255
2016-08-28	EGX30	8136.44	8126.89	8202.12	8028.06	509930000	0.0006	0.000608559	0.0155621	0.111428	1.19342e-06	0.224291	0	0.591161	0.830922	0.597534	0.504904	4	104.316	-0.207299	0	12.988	-1.67	47.31	-0.0774283	0.0742191	1.6	-0.02	-0.207299	4.64743	-1.67	0.0742191	-0.02	0.000608559	0.504904	0	0.491404	0.773406	0.577624	0.460609	4	0.460609	0.999985	1	-0.207299	0.484457	-0.0225779
2016-09-04	EGX30	8188.2	8137.46	8314.58	8128.42	435420000	0.0064	0.00634136	0.0125441	0.111428	1.45638e-05	0.240101	0.106766	0.557494	0.874519	0.660031	0.549703	4	88.765	-0.161434	0	13.4925	5.52	47.506	0.0511083	0.0560021	1.67	0.07	-0.161434	4.48599	5.52	0.0560021	0.07	0.00634136	0.549703	0.0805503	0.465275	0.827844	0.637954	0.502906	4	0.502906	0.999781	1	-0.161434	0.460609	0.000608559
2016-09-11	EGX30	7979.25	8189.7	8189.7	7979.25	168120000	-0.0255	-0.0258497	0.0162116	0.111428	0.000153757	0.165456	1	0.598407	1	0.36497	0.740844	4	88.765	-0.161434	0	16.564	-2.13	46.208	-0.0664561	0.0378862	1.7	0.03	-0.161434	4.48599	-2.13	0.0378862	0.03	-0.0258497	0.740844	0.982891	0.497028	1	0.353124	0.708261	4	0.708261	0.999676	1	-0.161434	0.502906	0.00634136
2016-09-18	EGX30	7913.94	7978.13	8064.61	7900.96	535970000	-0.0082	-0.00821866	0.0140533	0.111428	1.53342e-05	0.173369	0.113223	0.57433	0.815685	0.396249	0.474872	4	88.765	-0.161434	0	13.812	-3.08	46.238	0.0315346	0.0408464	1.62	-0.08	-0.161434	4.48599	-3.08	0.0408464	-0.08	-0.00821866	0.474872	0.0855446	0.478341	0.754381	0.383319	0.425396	4	0.425396	0.999523	1	-0.161434	0.708261	-0.0258497
2016-09-25	EGX30	7881.11	7918.95	8047.4	7872.66	479620000	-0.0041	-0.004157	0.0134052	0.111428	8.66729e-06	0.174794	0.0573394	0.5671	0.848657	0.401879	0.468744	4	88.765	-0.161434	0	13.46	1	46.744	0.0322303	0.0734839	1.6	-0.02	-0.161434	4.48599	1	0.0734839	-0.02	-0.004157	0.468744	0.0423256	0.47273	0.795551	0.388754	0.42484	4	0.42484	0.999113	1	-0.161434	0.425396	-0.00821866
2016-10-02	EGX30	8368.52	7888.96	8369.02	7888.96	5.3105e+08	0.0618	0.0600083	0.0375739	0.111428	0.000112999	0.201365	0.931884	0.83671	0.818564	0.506911	0.773517	4	82.818	-0.0693462	0	13.302	0.19	49.524	0.0455867	0.0222052	1.73	0.13	-0.0693462	4.41665	0.19	0.0222052	0.13	0.0600083	0.773517	0.718672	0.681981	0.757975	0.490143	0.662193	4	0.662193	0.997874	1	-0.0693462	0.42484	-0.004157
2016-10-09	EGX30	8505.12	8367.88	8506.35	8182.28	901510000	0.0163	0.0161913	0.0312496	0.111428	1.79602e-05	0.216326	0.135235	0.76616	0.601798	0.56605	0.517311	4	82.818	-0.0693462	0	15.492	2.64	49.942	-0.0326116	0.0362392	1.8	0.07	-0.0693462	4.41665	2.64	0.0362392	0.07	0.0161913	0.517311	0.102568	0.627225	0.487312	0.547231	0.441084	4	0.441084	0.997194	1	-0.0693462	0.662193	0.0600083
2016-10-16	EGX30	8277.21	8504.3	8613.44	8134.43	934770000	-0.0268	-0.0271624	0.0370345	0.111428	2.90578e-05	0.208187	0.228259	0.830693	0.582336	0.533877	0.543791	4	82.818	-0.0693462	0	14.598	-2.78	50.334	0.0284437	0.0508248	1.74	-0.06	-0.0693462	4.41665	-2.78	0.0508248	-0.06	-0.0271624	0.543791	0.17451	0.677311	0.463012	0.516175	0.457752	4	0.457752	0.99706	1	-0.0693462	0.441084	0.0161913
2016-10-23	EGX30	8343.31	8298.54	8343.31	8208.34	729740000	0.008	0.00795407	0.0358339	0.111428	1.08999e-05	0.248176	0.0760535	0.8173	0.702305	0.691949	0.571902	4	82.818	-0.0693462	0	14.454	2.85	48.954	-0.0510002	0.0330749	1.86	0.12	-0.0693462	4.41665	2.85	0.0330749	0.12	0.00795407	0.571902	0.0567986	0.666916	0.61281	0.668765	0.501322	4	0.501322	0.99747	1	-0.0693462	0.457752	-0.0271624
2016-10-30	EGX30	8810.51	8349.26	9231.09	8338.02	1270000000	0.056	0.0544853	0.0335143	0.111428	4.29018e-05	0.273912	0.344304	0.791423	0.386184	0.79368	0.578898	4	82.818	-0.0693462	0	19.906	6.32	44.626	-0.104013	0.0525059	1.79	-0.07	-0.0693462	4.41665	6.32	0.0525059	-0.07	0.0544853	0.578898	0.264255	0.646833	0.218088	0.766968	0.474036	4	0.474036	0.998432	1	-0.0693462	0.501322	0.00795407
2016-11-06	EGX30	10688.2	8976.4	10688.2	8976.4	2890000000	0.2131	0.193191	0.0966836	0.0920036	6.68482e-05	0.216132	0.54503	0.872512	0	0.565283	0.495706	4	105.23	0.2395	0	16.148	-8.34	43.092	-0.034254	0.0519107	2.15	0.36	0.2395	4.65615	-8.34	0.0519107	0.36	0.193191	0.495706	0.419491	0.81563	0	0.546491	0.445403	4	0.445403	0.999962	1	0.2395	0.474036	0.0544853
2016-11-13	EGX30	11221.6	10940.7	11336.3	10625	3310000000	0.0499	0.0487003	0.0807716	0.0920036	1.47131e-05	0.23455	0.108017	0.872512	0	0.638086	0.404654	4	105.23	0.2395	0	13.554	-1.32	44.006	0.0651241	0.059197	2.34	0.19	0.2395	4.65615	-1.32	0.059197	0.19	0.0487003	0.404654	0.0815184	0.81563	0	0.61677	0.37848	4	0.37848	0.999991	1	0.2395	0.445403	0.193191
2016-11-20	EGX30	11353.1	11205.8	11688	11061.6	2620000000	0.0117	0.0116548	0.0797458	0.0920036	4.44839e-06	0.257224	0.0219752	0.872512	0	0.727714	0.40555	4	105.23	0.2395	0	12.4	-0.51	46.492	0.0421092	0.0490334	2.36	0.02	0.2395	4.65615	-0.51	0.0490334	0.02	0.0116548	0.40555	0.0149761	0.81563	0	0.70329	0.383474	4	0.383474	0.999992	1	0.2395	0.37848	0.0487003
2016-11-27	EGX30	11548.1	11352.9	11580.1	11103.1	2130000000	0.0172	0.0170335	0.0852783	0.0920036	7.99697e-06	0.258984	0.0517205	0.872512	0	0.734671	0.414726	4	105.23	0.2395	0	13.514	1.78	48.78	0.122378	0.119816	2.4	0.04	0.2395	4.65615	1.78	0.119816	0.04	0.0170335	0.414726	0.0379802	0.81563	0	0.710006	0.390904	4	0.390904	0.999992	1	0.2395	0.383474	0.0116548
2016-12-04	EGX30	11297.9	11552.8	11641	11228.1	1990000000	-0.0217	-0.0219057	0.0289135	0.0920036	1.10079e-05	0.197779	0.0769591	0.635332	0	0.492736	0.301257	4	118.993	0.122916	0	12.108	-2.37	52.26	-0.00306103	0.0299956	2.47	0.07	0.122916	4.77906	-2.37	0.0299956	0.07	-0.0219057	0.301257	0.057499	0.500244	0	0.47646	0.258551	4	0.258551	0.999999	1	0.122916	0.390904	0.0170335
2016-12-11	EGX30	11326	11304.8	11529	11210.8	1270000000	0.0025	0.00248409	0.0172292	0.0920036	1.95598e-06	0.124512	0.00108303	0.50499	0.386184	0.203122	0.273845	4	118.993	0.122916	0	12.708	0.45	53.258	0.0368671	0.0646749	2.6	0.13	0.122916	4.77906	0.45	0.0646749	0.13	0.00248409	0.273845	0	0.399083	0.218088	0.196889	0.203515	4	0.203515	0.999999	1	0.122916	0.258551	-0.0219057
2016-12-18	EGX30	12420.3	11381.5	12534	11381.5	2610000000	0.0966	0.0922286	0.0492086	0.0920036	3.53366e-05	0.138923	0.28089	0.86173	0	0.260087	0.350677	4	118.993	0.122916	0	11.46	-0.76	53.814	-0.00407106	0.0412425	2.55	-0.05	0.122916	4.77906	-0.76	0.0412425	-0.05	0.0922286	0.350677	0.215213	0.675958	0	0.251879	0.285762	4	0.285762	0.999999	1	0.122916	0.203515	0.00248409
2016-12-25	EGX30	12344.9	12399.1	12411.1	12182	1790000000	-0.0061	-0.00609002	0.0513694	0.0920036	3.40224e-06	0.189846	0.0132061	0.872512	0.0819178	0.46138	0.357254	4	118.993	0.122916	0	13.0875	2.6	54.96	0.0189187	0.0187412	2.45	-0.1	0.122916	4.77906	2.6	0.0187412	-0.1	-0.00609002	0.357254	0.0081943	0.694666	0	0.446191	0.287263	4	0.287263	0.999999	1	0.122916	0.285762	0.0922286
2017-01-01	EGX30	12824.3	12326.7	12826.2	12290.6	1840000000	0.0388	0.0381012	0.0446704	0.0920036	2.07071e-05	0.199026	0.158261	0.811105	0.0526615	0.497667	0.379924	4	123.476	0.0369845	0	11.9225	-2.72	55.1275	0.0169587	0.0201877	2.42	-0.03	0.0369845	4.81605	-2.72	0.0201877	-0.03	0.0381012	0.379924	0.120376	0.636667	0	0.48122	0.309566	4	0.309566	1	1	0.0369845	0.287263	-0.00609002
2017-01-08	EGX30	13223.9	12878.9	13235	12739.8	2490000000	0.0312	0.0306824	0.0405631	0.0509178	1.23223e-05	0.180957	0.0879765	0.543685	0	0.426243	0.264476	4	123.476	0.0369845	0	11.416	-0.09	54.016	-0.0277518	0.0397743	2.4	-0.02	0.0369845	4.81605	-0.09	0.0397743	-0.02	0.0306824	0.264476	0.0660195	0.375302	0	0.412273	0.213398	4	0.213398	1	1	0.0369845	0.309566	0.0381012
2017-01-15	EGX30	12806.8	13247.1	13544.4	12806.8	2430000000	-0.0315	-0.0320519	0.032776	0.0509178	1.31901e-05	0.230221	0.0952507	0.456817	0	0.620976	0.293261	4	123.476	0.0369845	0	12.1675	0.31	54.194	0.0122477	0.0404414	2.48	0.08	0.0369845	4.81605	0.31	0.0404414	0.08	-0.0320519	0.293261	0.0716451	0.307881	0	0.600253	0.244945	4	0.244945	1	1	0.0369845	0.213398	0.0306824
2017-01-22	EGX30	13091	12809.8	13092.3	12629.7	1100000000	0.0222	0.0219549	0.0318403	0.0509178	1.9959e-05	0.262134	0.15199	0.44638	0.485656	0.747123	0.457787	4	123.476	0.0369845	0	10.972	-0.96	54.906	-0.00437	0.0352838	2.49	0.01	0.0369845	4.81605	-0.96	0.0352838	0.01	0.0219549	0.457787	0.115525	0.299781	0.342293	0.722025	0.369906	4	0.369906	1	1	0.0369845	0.244945	-0.0320519
2017-01-29	EGX30	12806.1	13105.4	13223.4	12578.2	1410000000	-0.0218	-0.0220095	0.0312765	0.0509178	1.56096e-05	0.270037	0.115532	0.44009	0.304266	0.778362	0.409563	4	123.476	0.0369845	0	11.716	0.39	55.534	0.0202319	0.0133558	2.49	0	0.0369845	4.81605	0.39	0.0133558	0	-0.0220095	0.409563	0.08733	0.294899	0.115802	0.752181	0.312553	4	0.312553	1	1	0.0369845	0.369906	0.0219549
2017-02-05	EGX30	13114.9	12807.7	13411.3	12807.7	1080000000	0.0241	0.0238267	0.0291223	0.0400396	2.20617e-05	0.268699	0.169616	0.357386	0.497358	0.773072	0.449358	4	127.093	0.0288772	0	11.168	-0.12	54.482	-0.0129591	0.0384112	2.41	-0.08	0.0288772	4.84492	-0.12	0.0384112	-0.08	0.0238267	0.449358	0.129157	0.216462	0.356905	0.747075	0.3624	4	0.3624	1	1	0.0288772	0.312553	-0.0220095
2017-02-12	EGX30	12652	13118.2	13139.1	12300.1	852530000	-0.0353	-0.035933	0.0304869	0.0413333	4.21487e-05	0.275918	0.337991	0.379586	0.630457	0.801609	0.537411	4	127.093	0.0288772	0	11.406	0.64	54.464	-0.0131293	0.0270477	2.42	0.01	0.0288772	4.84492	0.64	0.0270477	0.01	-0.035933	0.537411	0.259373	0.235387	0.523098	0.774622	0.44812	4	0.44812	1	1	0.0288772	0.3624	0.0238267
2017-02-19	EGX30	12240.5	12652	12714.7	12211.2	1370000000	-0.0325	-0.0330604	0.0277377	0.0413333	2.41316e-05	0.320665	0.186967	0.348918	0.327671	0.978488	0.460511	4	127.093	0.0288772	0	11.6225	-0.02	55.4	0.00384722	0.0440846	2.31	-0.11	0.0288772	4.84492	-0.02	0.0440846	-0.11	-0.0330604	0.460511	0.142575	0.211584	0.145027	0.945368	0.361139	4	0.361139	1	1	0.0288772	0.44812	-0.035933
2017-02-26	EGX30	12310.5	12270.4	12410.2	11844.5	937210000	0.0057	0.00569917	0.0294105	0.0413333	6.08099e-06	0.316113	0.0356602	0.367579	0.580908	0.960493	0.48616	4	127.093	0.0288772	0	12.064	-0.51	54.402	-0.0104771	0.0570178	2.49	0.18	0.0288772	4.84492	-0.51	0.0570178	0.18	0.00569917	0.48616	0.0255596	0.226068	0.461229	0.927997	0.410213	4	0.410213	1	1	0.0288772	0.361139	-0.0330604
2017-03-05	EGX30	12853.3	12312.2	12904.5	12312.2	1060000000	0.0441	0.0431465	0.037313	0.0413333	4.07043e-05	0.300791	0.325883	0.455734	0.509061	0.899928	0.547652	4	122.737	-0.0348774	0	11.702	0.7	52.784	-0.0666595	0.0576268	2.58	0.09	-0.0348774	4.81005	0.7	0.0576268	0.09	0.0431465	0.547652	0.25001	0.294487	0.371517	0.869532	0.446386	4	0.446386	1	1	-0.0348774	0.410213	0.00569917
2017-03-12	EGX30	12984	12853.9	13020.8	12737.5	965950000	0.0102	0.0101188	0.0312075	0.0413333	1.04755e-05	0.271242	0.0724963	0.387625	0.564092	0.783125	0.451835	4	122.737	-0.0348774	0	11.554	-0.38	50.294	-0.000988045	0.0252162	2.5	-0.08	-0.0348774	4.81005	-0.38	0.0252162	-0.08	0.0101188	0.451835	0.0540476	0.241626	0.440231	0.756779	0.373171	4	0.373171	1	1	-0.0348774	0.446386	0.0431465
2017-03-19	EGX30	13032.1	13068.6	13190	12848.5	1220000000	0.0037	0.00369542	0.0185165	0.0413333	3.02903e-06	0.268665	0.0100777	0.246053	0.41544	0.772939	0.361127	4	122.737	-0.0348774	0	12.54	1.68	50.102	-0.0121334	0.0203643	2.4	-0.1	-0.0348774	4.81005	1.68	0.0203643	-0.1	0.00369542	0.361127	0.00577488	0.131748	0.254619	0.746946	0.284772	4	0.284772	1	1	-0.0348774	0.373171	0.0101188
2017-03-26	EGX30	12994.8	13035.6	13129.3	12938.1	898040000	-0.0029	-0.0028632	0.0204469	0.0413333	3.18827e-06	0.266678	0.0114125	0.267587	0.603828	0.765086	0.411978	4	122.737	-0.0348774	0	11.872	-0.59	51.33	0.0436597	0.0245746	2.4	0	-0.0348774	4.81005	-0.59	0.0245746	0	-0.0028632	0.411978	0.00680721	0.148462	0.489847	0.739366	0.346121	4	0.346121	1	1	-0.0348774	0.284772	0.00369542
2017-04-02	EGX30	13098.5	12994.8	13407.1	12912.3	880670000	0.008	0.0079515	0.00571968	0.0413333	9.02892e-06	0.256895	0.0603706	0.1033	0.613992	0.726415	0.376019	4	174.223	0.350292	1	12.464	0.5	53.278	0.0383361	0.0242271	2.38	-0.02	0.350292	5.16034	0.5	0.0242271	-0.02	0.0079515	0.376019	0.0446699	0.0371507	0.502538	0.702035	0.321599	4	0.321599	1	1	0.350292	0.346121	-0.0028632
2017-04-09	EGX30	12967.4	13098.5	13099.9	12832.9	638610000	-0.01	-0.0100638	0.00787296	0.0413333	1.57589e-05	0.249628	0.116784	0.127321	0.755627	0.697689	0.424355	4	174.223	0.350292	1	15.2125	3.09	54.83	0.0148232	0.0115319	2.24	-0.14	0.350292	5.16034	3.09	0.0115319	-0.14	-0.0100638	0.424355	0.088298	0.0395972	0.679391	0.674305	0.370398	4	0.370398	1	1	0.350292	0.321599	0.0079515
2017-04-16	EGX30	12905.9	12969.1	13129.8	12883.3	372220000	-0.0047	-0.00475628	0.00756416	0.0413333	1.27781e-05	0.268557	0.0917978	0.123876	0.9115	0.772513	0.474922	4	174.223	0.350292	1	14.558	-1.33	52.082	-0.0976198	0.05556	2.24	0	0.350292	5.16034	-1.33	0.05556	0	-0.00475628	0.474922	0.0689747	0.0371507	0.874019	0.746535	0.43167	4	0.43167	1	1	0.350292	0.370398	-0.0100638
2017-04-23	EGX30	12525.7	12906.6	12906.6	12524	564300000	-0.0295	-0.029899	0.0157386	0.0413333	5.29842e-05	0.2401	0.428817	0.215065	0.799108	0.660026	0.525754	4	174.223	0.350292	1	10.726	-3.81	49.546	-0.00945776	0.0191127	2.29	0.05	0.350292	5.16034	-3.81	0.0191127	0.05	-0.029899	0.525754	0.329616	0.107698	0.733682	0.637948	0.452236	4	0.452236	1	1	0.350292	0.43167	-0.00475628
2017-04-30	EGX30	12709.9	12523.9	12722.1	12345.3	556520000	0.0147	0.0146018	0.0182967	0.0413333	2.62378e-05	0.251845	0.204621	0.2436	0.803661	0.706452	0.489583	4	174.223	0.350292	1	10.482	-0.25	48.704	-0.0414877	0.0408462	2.36	0.07	0.350292	5.16034	-0.25	0.0408462	0.07	0.0146018	0.489583	0.156229	0.129845	0.739367	0.682765	0.427051	4	0.427051	1	1	0.350292	0.452236	-0.029899
2017-05-07	EGX30	12907	12711.5	13047.6	12665.5	1370000000	0.0155	0.0153847	0.0212996	0.0413333	1.12297e-05	0.182293	0.0788182	0.2771	0.327671	0.431522	0.278778	4	163.49	-0.0635839	1	10.188	-0.17	48.004	0.0337751	0.0372369	2.33	-0.03	-0.0635839	5.09675	-0.17	0.0372369	-0.03	0.0153847	0.278778	0.0589367	0.155844	0.145027	0.417369	0.194294	4	0.194294	1	1	-0.0635839	0.427051	0.0146018
2017-05-14	EGX30	12952.4	12909.2	13082	12860	1380000000	0.0035	0.0035113	0.0212363	0.0413333	2.54442e-06	0.156267	0.00601556	0.276393	0.32182	0.328648	0.233219	4	163.49	-0.0635839	1	12.672	1.64	51.75	0.0726807	0.0497681	2.23	-0.1	-0.0635839	5.09675	1.64	0.0497681	-0.1	0.0035113	0.233219	0.00263336	0.155296	0.137721	0.318062	0.153428	4	0.153428	1	1	-0.0635839	0.194294	0.0153847
2017-05-21	EGX30	13094.4	12952.4	13107.2	12648.2	1630000000	0.011	0.0109066	0.00542362	0.0413333	6.69118e-06	0.150979	0.040775	0.0999977	0.175538	0.307742	0.156013	4	163.49	-0.0635839	1	10.294	-2.23	52.584	-0.0374489	0.0355632	2.25	0.02	-0.0635839	5.09675	-2.23	0.0355632	0.02	0.0109066	0.156013	0.0295153	0.0371507	0	0.297881	0.0911367	4	0.0911367	1	1	-0.0635839	0.153428	0.0035113
2017-05-28	EGX30	13467.3	13094.4	13482.3	13091.6	1410000000	0.0285	0.0280776	0.0103085	0.0413333	1.99132e-05	0.179098	0.151606	0.15449	0.304266	0.418896	0.257314	4	163.49	-0.0635839	1	10.1075	-0.06	50.234	-0.0479447	0.0656206	2.15	-0.1	-0.0635839	5.09675	-0.06	0.0656206	-0.1	0.0280776	0.257314	0.115229	0.0606837	0.115802	0.40518	0.174224	4	0.174224	1	1	-0.0635839	0.0911367	0.0109066
2017-06-04	EGX30	13683.7	13468.4	13692.7	13462.9	1120000000	0.0161	0.0159386	0.0103286	0.0413333	1.42309e-05	0.212783	0.103976	0.154714	0.473953	0.552044	0.321172	4	135.294	-0.1893	1	10.354	0.95	47.276	-0.0382802	0.0287803	2.21	0.06	-0.1893	4.90745	0.95	0.0287803	0.06	0.0159386	0.321172	0.0783927	0.0608576	0.32768	0.533712	0.250161	4	0.250161	1	1	-0.1893	0.174224	0.0280776
2017-06-11	EGX30	13478.8	13685.3	13690.7	13460	1740000000	-0.015	-0.015088	0.0181869	0.0375955	8.67129e-06	0.232034	0.0573729	0.222216	0.111174	0.628143	0.254727	4	135.294	-0.1893	1	10.76	-0.32	46.182	-0.0203602	0.0345786	2.16	-0.05	-0.1893	4.90745	-0.32	0.0345786	-0.05	-0.015088	0.254727	0.0423516	0.108352	0	0.607172	0.189469	4	0.189469	1	1	-0.1893	0.250161	0.0159386
2017-06-18	EGX30	13417.1	13482.7	13532.1	13323.9	870160000	-0.0046	-0.00458138	0.0195178	0.0375955	5.26498e-06	0.243229	0.0288201	0.237063	0.620141	0.672394	0.389605	4	135.294	-0.1893	1	10.496	-0.36	44.626	-0.0347319	0.0467026	2.15	-0.01	-0.1893	4.90745	-0.36	0.0467026	-0.01	-0.00458138	0.389605	0.0202697	0.119875	0.510217	0.649888	0.325062	4	0.325062	1	1	-0.1893	0.189469	-0.015088
2017-06-25	EGX30	13395.8	13482.6	13486	13394.8	153790000	-0.0016	-0.00159102	0.0128858	0.0336817	1.03454e-05	0.245335	0.071406	0.141971	1	0.680718	0.473524	4	135.294	-0.1893	1	10.722	1.16	46.162	0.0644819	0.0480955	2.31	0.16	-0.1893	4.90745	1.16	0.0480955	0.16	-0.00159102	0.473524	0.0532044	0.0458471	1	0.657923	0.439244	4	0.439244	1	1	-0.1893	0.325062	-0.00458138
2017-07-02	EGX30	13369.9	13396.7	13518.8	13312.2	946270000	-0.0019	-0.00193756	0.00633474	0.0336817	2.04757e-06	0.2004	0.00185079	0.0688918	0.575607	0.503097	0.287362	4	91.4721	-0.39142	0	11.505	0.01	48.172	-0.0130413	0.0717143	2.39	0.08	-0.39142	4.51603	0.01	0.0717143	0.08	-0.00193756	0.287362	0	0	0.45461	0.486462	0.235268	4	0.235268	0.999893	1	-0.39142	0.439244	-0.00159102
2017-07-09	EGX30	13822.6	13369.9	13864.3	13260.5	1690000000	0.0339	0.0332998	0.018051	0.0336817	1.9704e-05	0.19023	0.149853	0.199591	0.140431	0.462897	0.238193	4	91.4721	-0.39142	0	10.342	-1.68	47.104	0.0300998	0.0204127	2.33	-0.06	-0.39142	4.51603	-1.68	0.0204127	-0.06	0.0332998	0.238193	0.113873	0.0905675	0	0.447656	0.163024	4	0.163024	0.999871	1	-0.39142	0.235268	-0.00193756
2017-07-16	EGX30	13715.1	13825	13970.2	13670.8	1460000000	-0.0078	-0.00780971	0.0187579	0.0336817	5.34912e-06	0.171637	0.0295254	0.207476	0.27501	0.389402	0.225353	4	91.4721	-0.39142	0	9.688	-0.15	47.986	-0.00880878	0.0253541	2.24	-0.09	-0.39142	4.51603	-0.15	0.0253541	-0.09	-0.00780971	0.225353	0.0208152	0.0966875	0.0792716	0.37671	0.143371	4	0.143371	0.999867	1	-0.39142	0.163024	0.0332998
2017-07-23	EGX30	13609.2	13712.2	13828	13609.2	1010000000	-0.0077	-0.00774699	0.0197584	0.0336817	7.67029e-06	0.143988	0.0489822	0.218637	0.538317	0.28011	0.271512	4	91.4721	-0.39142	0	9.772	0.93	49.95	0.0911458	0.044617	2.3	0.06	-0.39142	4.51603	0.93	0.044617	0.06	-0.00774699	0.271512	0.0358625	0.10535	0.408048	0.271207	0.205117	4	0.205117	0.999871	1	-0.39142	0.143371	-0.00780971
2017-07-30	EGX30	13413.1	13609.2	13609.2	13352.8	1030000000	-0.0144	-0.0145142	0.0218932	0.0336817	1.40914e-05	0.0893903	0.102806	0.242452	0.526615	0.0642928	0.234041	4	91.4721	-0.39142	0	10.22	-0.26	52.042	0.00918843	0.0388193	2.27	-0.03	-0.39142	4.51603	-0.26	0.0388193	-0.03	-0.0145142	0.234041	0.0774883	0.123833	0.393436	0.0628737	0.164408	4	0.164408	0.999893	1	-0.39142	0.205117	-0.00774699
2017-08-06	EGX30	13462.4	13420.1	13715.6	13420.1	1120000000	0.0037	0.0036658	0.00754541	0.0336817	3.27303e-06	0.104355	0.012123	0.0823972	0.473953	0.123445	0.172979	4	201.64	0.790452	1	12.71	5.48	51.964	-0.019433	0.0340968	2.19	-0.08	0.790452	5.30649	5.48	0.0340968	-0.08	0.0036658	0.172979	0.00735666	0	0.32768	0.119974	0.113753	4	0.113753	1	1	0.790452	0.164408	-0.0145142
2017-08-13	EGX30	13119.4	13462.4	13462.6	13102.2	814370000	-0.0255	-0.025804	0.0123442	0.0336817	3.16859e-05	0.144334	0.250289	0.135929	0.652785	0.281476	0.33012	4	201.64	0.790452	1	13.184	-1.25	50.582	-0.0099581	0.0315974	2.19	0	0.790452	5.30649	-1.25	0.0315974	0	-0.025804	0.33012	0.191547	0.041158	0.550978	0.272525	0.264052	4	0.264052	1	1	0.790452	0.113753	0.0036658
2017-08-20	EGX30	12926.4	13119.4	13169.7	12925.9	652340000	-0.0147	-0.0148234	0.0122098	0.0336817	2.27234e-05	0.243167	0.175162	0.13443	0.747594	0.672149	0.432334	4	201.64	0.790452	1	12.06	-2.98	52.028	0.0176996	0.0232315	2.17	-0.02	0.790452	5.30649	-2.98	0.0232315	-0.02	-0.0148234	0.432334	0.133446	0.0399949	0.669359	0.649651	0.373113	4	0.373113	1	1	0.790452	0.264052	-0.025804
2017-08-27	EGX30	13415.8	12926.5	13425.3	12899.5	759860000	0.0379	0.0371591	0.027567	0.0336817	4.89026e-05	0.173375	0.394605	0.305744	0.684681	0.396272	0.445325	4	201.64	0.790452	1	10.992	-1.15	52.252	0.0243775	0.0185725	2.16	-0.01	0.790452	5.30649	-1.15	0.0185725	-0.01	0.0371591	0.445325	0.303157	0.172956	0.590804	0.383341	0.362564	4	0.362564	1	1	0.790452	0.373113	-0.0148234
2017-09-03	EGX30	13432.7	13417.5	13461.6	13317.3	927140000	0.0013	0.00126041	0.0274879	0.0336817	1.35946e-06	0.168884	0	0.304862	0.586801	0.37852	0.317546	4	148.071	-0.308795	1	11.8825	1.99	53.884	0.0259996	0.028596	2.06	-0.1	-0.308795	4.99769	1.99	0.028596	-0.1	0.00126041	0.317546	0	0.172271	0.468587	0.366205	0.251766	4	0.251766	1	1	-0.308795	0.362564	0.0371591
2017-09-10	EGX30	13610.6	13432.7	13639.8	13411.1	2020000000	0.0132	0.0131583	0.0218902	0.0336817	6.51403e-06	0.157744	0.0392901	0.242418	0	0.334484	0.154048	4	148.071	-0.308795	1	10.484	-1.95	55.544	0.0294431	0.0308525	2.2	0.14	-0.308795	4.99769	-1.95	0.0308525	0.14	0.0131583	0.154048	0.0283669	0.123807	0	0.323696	0.118967	4	0.118967	1	1	-0.308795	0.251766	0.00126041
2017-09-17	EGX30	13695.3	13635.2	13784.4	13571.5	1430000000	0.0062	0.00620526	0.0159093	0.0336817	4.33934e-06	0.16218	0.0210612	0.175699	0.292564	0.35202	0.210336	4	148.071	-0.308795	1	9.874	-0.58	57.034	0.034637	0.0279041	2.26	0.06	-0.308795	4.99769	-0.58	0.0279041	0.06	0.00620526	0.210336	0.0142692	0.0720243	0.10119	0.340624	0.132027	4	0.132027	1	1	-0.308795	0.118967	0.0131583
2017-09-24	EGX30	13888.5	13698.7	13894.8	13599	2270000000	0.0141	0.014007	0.00604442	0.0336817	6.17048e-06	0.182201	0.0364103	0.0656532	0	0.431159	0.133306	4	148.071	-0.308795	1	9.862	-0.08	58.75	-0.0197957	0.0417374	2.33	0.07	-0.308795	4.99769	-0.08	0.0417374	0.07	0.014007	0.133306	0.0261397	0	0	0.417018	0.110789	4	0.110789	1	1	-0.308795	0.132027	0.00620526
2017-10-01	EGX30	13882	13896.6	14102	13811.1	1130000000	-0.0005	-0.000471004	0.00676927	0.0336817	4.16817e-07	0.185857	0	0.0737391	0.468102	0.445611	0.246863	4	147.08	-0.00671322	1	9.486	0.14	56.076	-0.0270191	0.0425789	2.37	0.04	-0.00671322	4.99098	0.14	0.0425789	0.04	-0.000471004	0.246863	0	0	0.320374	0.430969	0.187836	4	0.187836	1	1	-0.00671322	0.110789	0.014007
2017-10-08	EGX30	13891.7	13909.6	14122.1	13780.4	1680000000	0.0007	0.000701383	0.00660655	0.0336817	4.1749e-07	0.183369	0	0.0719239	0.146282	0.435778	0.163496	4	147.08	-0.00671322	1	9.956	-0.04	56.206	0.0242091	0.028669	2.28	-0.09	-0.00671322	4.99098	-0.04	0.028669	-0.09	0.000701383	0.163496	0	0	0	0.421477	0.105369	4	0.105369	1	1	-0.00671322	0.187836	-0.000471004
2017-10-15	EGX30	13713.6	13893.7	13932.4	13411	1590000000	-0.0128	-0.0129028	0.0109992	0.0336817	8.11494e-06	0.178858	0.0527094	0.120925	0.198943	0.417945	0.197631	4	147.08	-0.00671322	1	10.062	0.36	57.776	0.0179526	0.0140458	2.39	0.11	-0.00671322	4.99098	0.36	0.0140458	0.11	-0.0129028	0.197631	0.038745	0.029513	0	0.404262	0.11813	4	0.11813	1	1	-0.00671322	0.105369	0.000701383
2017-10-22	EGX30	13955.5	13703.5	14049.4	13689.5	1530000000	0.0176	0.017482	0.0124771	0.0336817	1.14262e-05	0.131659	0.0804652	0.137412	0.234051	0.231373	0.170825	4	147.08	-0.00671322	1	10.912	-0.17	58.576	0.0382968	0.0266385	2.42	0.03	-0.00671322	4.99098	-0.17	0.0266385	0.03	0.017482	0.170825	0.0602105	0.0423088	0.0281286	0.22416	0.088702	4	0.088702	1	1	-0.00671322	0.11813	-0.0129028
2017-10-29	EGX30	14319.3	13957.3	14386.2	13957.2	1840000000	0.0261	0.0257395	0.017268	0.0336817	1.39889e-05	0.113552	0.101947	0.190856	0.0526615	0.159802	0.126317	4	147.08	-0.00671322	1	9.99	-0.66	61.038	0.0208941	0.0187843	2.34	-0.08	-0.00671322	4.99098	-0.66	0.0187843	-0.08	0.0257395	0.126317	0.0768235	0.0837884	0	0.155071	0.0789207	4	0.0789207	1	1	-0.00671322	0.088702	0.017482
2017-11-05	EGX30	14350.1	14314.2	14362.7	13964.6	1560000000	0.0022	0.00214863	0.0170852	0.0336817	1.37733e-06	0.102154	0	0.188816	0.216497	0.114747	0.130015	4	119.192	-0.210241	0	10.172	2.15	64.286	0.0466014	0.0465934	2.4	0.06	-0.210241	4.78074	2.15	0.0465934	0.06	0.00214863	0.130015	0	0.0822052	0.00621022	0.111578	0.0499984	4	0.0499984	0.999999	1	-0.210241	0.0789207	0.0257395
2017-11-12	EGX30	13847.4	14354.9	14424.5	13847.4	1030000000	-0.035	-0.0356651	0.0272104	0.0348862	3.46263e-05	0.122849	0.274936	0.308262	0.526615	0.196552	0.326591	4	119.192	-0.210241	0	11.882	0.14	61.524	-0.0479048	0.0400598	2.35	-0.05	-0.210241	4.78074	0.14	0.0400598	-0.05	-0.0356651	0.326591	0.210608	0.171586	0.393436	0.190547	0.241544	4	0.241544	0.999999	1	-0.210241	0.0499984	0.00214863
2017-11-19	EGX30	14106.2	13847.4	14106.2	13675.3	902830000	0.0187	0.0185177	0.0274056	0.0348862	2.05107e-05	0.119078	0.156615	0.31044	0.601025	0.181642	0.312431	4	119.192	-0.210241	0	9.9825	-1.76	62.678	0.0358668	0.0197604	2.34	-0.01	-0.210241	4.78074	-1.76	0.0197604	-0.01	0.0185177	0.312431	0.119102	0.173277	0.486348	0.176154	0.23872	4	0.23872	0.999999	1	-0.210241	0.241544	-0.0356651
2017-11-26	EGX30	14582.2	14099.5	14655	14096.7	956050000	0.0337	0.0331907	0.0296558	0.0348862	3.47165e-05	0.0862484	0.275692	0.335542	0.569885	0.0518735	0.308248	4	119.192	-0.210241	0	10.662	1.76	63.73	0.015451	0.0182629	2.37	0.03	-0.210241	4.78074	1.76	0.0182629	0.03	0.0331907	0.308248	0.211193	0.192759	0.447464	0.0508851	0.225575	4	0.225575	0.999999	1	-0.210241	0.23872	0.0185177
2017-12-03	EGX30	14294.7	14600.8	14726.9	14277.5	924700000	-0.0197	-0.019912	0.0321935	0.0348862	2.15335e-05	0.0551098	0.165188	0.363851	0.588228	0	0.279317	4	117.328	-0.0157634	0	10.754	-1.85	63.076	-0.0110567	0.0350973	2.38	0.01	-0.0157634	4.76497	-1.85	0.0350973	0.01	-0.019912	0.279317	0.125733	0.21473	0.470369	0	0.202708	4	0.202708	0.999999	1	-0.0157634	0.225575	0.0331907
2017-12-10	EGX30	14679.9	14298.2	14745.1	14296.5	723620000	0.0269	0.026589	0.0237752	0.0348862	3.67444e-05	0.0954168	0.29269	0.269942	0.705886	0.0881149	0.339158	4	117.328	-0.0157634	0	9.87	-0.16	64.354	-0.000783269	0.035396	2.35	-0.03	-0.0157634	4.76497	-0.16	0.035396	-0.03	0.026589	0.339158	0.224339	0.141845	0.617281	0.0858698	0.267334	4	0.267334	0.999999	1	-0.0157634	0.202708	-0.019912
2017-12-17	EGX30	14668.6	14685.8	14785.2	14625	690090000	-0.0008	-0.000771419	0.0246546	0.0348862	1.11785e-06	0.117857	0	0.279752	0.725505	0.176819	0.295519	4	117.328	-0.0157634	0	9.76	0.48	64.364	0.0124593	0.0196101	2.48	0.13	-0.0157634	4.76497	0.48	0.0196101	0.13	-0.000771419	0.295519	0	0.149459	0.641779	0.171498	0.240684	4	0.240684	0.999999	1	-0.0157634	0.267334	0.026589
2017-12-24	EGX30	15017	14670.3	15035.3	14667.4	5.1781e+08	0.0238	0.0234724	0.0219032	0.0348862	4.53302e-05	0.136796	0.364659	0.249059	0.826311	0.25168	0.422927	4	117.328	-0.0157634	0	10.485	1.14	66.52	0.0322854	0.0246606	2.4	-0.08	-0.0157634	4.76497	1.14	0.0246606	-0.08	0.0234724	0.422927	0.279998	0.125637	0.767649	0.243763	0.354262	4	0.354262	0.999999	1	-0.0157634	0.240684	-0.000771419
2017-12-31	EGX30	14782.4	15030.3	15060.1	14782.4	511720000	-0.0156	-0.015745	0.0202082	0.0348862	3.07687e-05	0.138884	0.242601	0.23015	0.829874	0.259933	0.390639	4	117.328	-0.0157634	0	9.34	-1.82	67.81	0.0190001	0.0244299	2.47	0.07	-0.0157634	4.76497	-1.82	0.0244299	0.07	-0.015745	0.390639	0.185601	0.110961	0.772098	0.251729	0.330098	4	0.330098	0.999999	1	-0.0157634	0.354262	0.0234724
2018-01-07	EGX30	15242.5	14784.8	15259.8	14779	886720000	0.0311	0.0306503	0.021489	0.0348862	3.4566e-05	0.173208	0.27443	0.244439	0.610452	0.395611	0.381233	4	163.54	0.332084	1	9.892	0.94	69.47	0.0236844	0.0200013	2.55	0.08	0.332084	5.09706	0.94	0.0200013	0.08	0.0306503	0.381233	0.210217	0.122051	0.498118	0.382703	0.303272	4	0.303272	1	1	0.332084	0.330098	-0.015745
2018-01-14	EGX30	15411	15257.5	15419.4	15076.6	1250000000	0.0111	0.0109953	0.0204106	0.0348862	8.79622e-06	0.173445	0.0584201	0.232408	0.397887	0.39655	0.271316	4	163.54	0.332084	1	11.765	1.11	69.388	-0.0156298	0.0215811	2.64	0.09	0.332084	5.09706	1.11	0.0215811	0.09	0.0109953	0.271316	0.0431614	0.112714	0.232701	0.38361	0.193046	4	0.193046	1	1	0.332084	0.303272	0.0306503
2018-01-21	EGX30	15170.7	15418.3	15472.4	15154.8	827970000	-0.0156	-0.0157136	0.0225774	0.0348862	1.89785e-05	0.21793	0.143771	0.25658	0.644828	0.572392	0.404393	4	163.54	0.332084	1	11.252	-0.19	70.04	0.0219282	0.0254836	2.66	0.02	0.332084	5.09706	-0.19	0.0254836	0.02	-0.0157136	0.404393	0.109169	0.131474	0.541042	0.553354	0.33376	4	0.33376	1	1	0.332084	0.193046	0.0109953
2018-01-28	EGX30	15088.7	15170.7	15401.5	15026.2	879690000	-0.0054	-0.00542445	0.0202611	0.0348862	6.16631e-06	0.149742	0.0363754	0.230741	0.614565	0.302853	0.296134	4	163.54	0.332084	1	14.59	6.23	68.004	-0.0382509	0.0331318	2.84	0.18	0.332084	5.09706	6.23	0.0331318	0.18	-0.00542445	0.296134	0.0261127	0.11142	0.503254	0.293162	0.233487	4	0.233487	1	1	0.332084	0.33376	-0.0157136
2018-02-04	EGX30	14921.3	15067.2	15067.2	14468.1	820990000	-0.0111	-0.0111544	0.0116657	0.0348862	1.35865e-05	0.160879	0.0985741	0.134857	0.648912	0.346878	0.307305	4	100.541	-0.486487	0	31.51	11.75	65.496	-0.0676171	0.0364215	2.83	-0.01	-0.486487	4.61057	11.75	0.0364215	-0.01	-0.0111544	0.307305	0.0742154	0.0370016	0.546141	0.335659	0.248254	4	0.248254	0.999981	1	-0.486487	0.233487	-0.00542445
2018-02-11	EGX30	14965.9	14929.2	14999	14660	954430000	0.003	0.00298723	0.008062	0.0328748	3.12986e-06	0.123768	0.0109229	0.0838076	0.570833	0.200183	0.216436	4	100.541	-0.486487	0	21.686	-9.6	62.718	0.0197902	0.0287267	2.87	0.04	-0.486487	4.61057	-9.6	0.0287267	0.04	0.00298723	0.216436	0.00642853	0.00408322	0.448648	0.194051	0.163303	4	0.163303	0.99998	1	-0.486487	0.248254	-0.0111544
2018-02-18	EGX30	15318.9	15004.6	15351.6	15004.6	1200000000	0.0236	0.0233124	0.0150844	0.030456	1.9427e-05	0.122701	0.147531	0.149098	0.427143	0.195965	0.229934	4	100.541	-0.486487	0	18.9575	-2.97	65.52	0.0417298	0.0267198	2.88	0.01	-0.486487	4.61057	-2.97	0.0267198	0.01	0.0233124	0.229934	0.112077	0.0648822	0.269231	0.18998	0.159042	4	0.159042	0.99998	1	-0.486487	0.163303	0.00298723
2018-02-25	EGX30	15443.2	15333	15721.4	15333	991890000	0.0081	0.00807882	0.0142272	0.030456	8.14487e-06	0.147177	0.0529603	0.139536	0.548914	0.292715	0.258531	4	100.541	-0.486487	0	19.26	3.1	66.024	-0.0423521	0.0391484	2.86	-0.02	-0.486487	4.61057	3.1	0.0391484	-0.02	0.00807882	0.258531	0.038939	0.0574611	0.421279	0.283375	0.200264	4	0.200264	0.999981	1	-0.486487	0.159042	0.0233124
2018-03-04	EGX30	16472.3	15456.9	16493	15414.2	976790000	0.0666	0.0645115	0.0278962	0.030456	6.60444e-05	0.191912	0.538292	0.292018	0.557749	0.469545	0.464401	4	205.328	0.714038	1	17.206	-4.95	65.12	0.0143687	0.037477	2.9	0.04	0.714038	5.32461	-4.95	0.037477	0.04	0.0645115	0.464401	0.41428	0.175806	0.432312	0.454073	0.369118	4	0.369118	1	1	0.714038	0.200264	0.00807882
2018-03-11	EGX30	16999.1	16478.1	17113.8	16325	1570000000	0.032	0.0314814	0.0238388	0.030456	2.00519e-05	0.153087	0.152769	0.246757	0.210646	0.316078	0.231562	4	205.328	0.714038	1	16.35	1.16	64.138	-0.00785405	0.0215329	2.85	-0.05	0.714038	5.32461	1.16	0.0215329	-0.05	0.0314814	0.231562	0.116128	0.140678	0	0.305928	0.140683	4	0.140683	1	1	0.714038	0.369118	0.0645115
2018-03-18	EGX30	17064.6	17016.2	17331.1	17016.2	1890000000	0.0039	0.00384457	0.0278171	0.030456	2.03416e-06	0.159579	0.00173839	0.291136	0.0234051	0.341737	0.164504	4	205.328	0.714038	1	20.658	9.07	67.396	0.0650892	0.038792	2.82	-0.03	0.714038	5.32461	9.07	0.038792	-0.03	0.00384457	0.164504	0	0.175122	0	0.330697	0.126455	4	0.126455	1	1	0.714038	0.140683	0.0314814
2018-03-25	EGX30	17450.2	17030.8	17461.2	16892.9	2860000000	0.0226	0.0223433	0.0253954	0.030456	7.81233e-06	0.164739	0.0501729	0.264121	0	0.362135	0.169107	4	205.328	0.714038	1	21.5925	-4.9	68.6475	-0.000144875	0.0154584	2.74	-0.08	0.714038	5.32461	-4.9	0.0154584	-0.08	0.0223433	0.169107	0.0367833	0.154155	0	0.350387	0.135331	4	0.135331	1	1	0.714038	0.126455	0.00384457
2018-04-01	EGX30	17410.6	17528.2	17779.9	17394.6	2930000000	-0.0023	-0.0022696	0.0157369	0.030456	7.74608e-07	0.204235	0	0.156378	0	0.518257	0.168659	4	237.684	0.146335	1	21.042	1.52	67.0275	-0.037044	0.0447778	2.77	0.03	0.146335	5.47094	1.52	0.0447778	0.03	-0.0022696	0.168659	0	0.0705322	0	0.501096	0.142907	4	0.142907	1	1	0.146335	0.135331	0.0223433
2018-04-08	EGX30	17615.7	17431.9	18082.2	17394.5	975560000	0.0118	0.0117113	0.0106292	0.030456	1.20047e-05	0.210142	0.0853149	0.0994	0.558469	0.541605	0.321197	4	237.684	0.146335	1	19.676	-4.08	71.244	0.0955698	0.0603011	2.82	0.05	0.146335	5.47094	-4.08	0.0603011	0.05	0.0117113	0.321197	0.0639611	0.0263102	0.43321	0.523634	0.261779	4	0.261779	1	1	0.146335	0.142907	-0.0022696
2018-04-15	EGX30	17781	17616.8	17904.9	17585.6	1140000000	0.0094	0.00934161	0.0100986	0.030456	8.1944e-06	0.193825	0.0533754	0.0934804	0.462251	0.477107	0.271553	4	237.684	0.146335	1	16.05	-0.53	73.392	0.0194864	0.0356794	2.96	0.14	0.146335	5.47094	-0.53	0.0356794	0.14	0.00934161	0.271553	0.0392601	0.0217158	0.313068	0.461372	0.208854	4	0.208854	1	1	0.146335	0.261779	0.0117113
2018-04-22	EGX30	18363.3	17803	18401.2	17803	1290000000	0.0327	0.032222	0.0143462	0.0271271	2.49783e-05	0.195992	0.194063	0.122909	0.374481	0.485673	0.294282	4	237.684	0.146335	1	16.77	-1.47	74.982	0.00946989	0.0391855	2.96	0	0.146335	5.47094	-1.47	0.0391855	0	0.032222	0.294282	0.148064	0.0584915	0.203476	0.469641	0.219918	4	0.219918	1	1	0.146335	0.208854	0.00934161
2018-04-29	EGX30	17832.9	18388	18414.1	17832.7	913430000	-0.0289	-0.0293107	0.0256789	0.03026	3.20887e-05	0.176868	0.253665	0.266227	0.594823	0.41008	0.381198	4	237.684	0.146335	1	15.612	-0.64	74.422	-0.00772925	0.0334983	2.95	-0.01	0.146335	5.47094	-0.64	0.0334983	-0.01	-0.0293107	0.381198	0.194158	0.156609	0.478603	0.39667	0.30651	4	0.30651	1	1	0.146335	0.219918	0.032222
2018-05-06	EGX30	17155.1	17844.5	17941.5	17153.7	1040000000	-0.038	-0.038745	0.0332182	0.0345736	3.72548e-05	0.179075	0.296969	0.373596	0.520763	0.418801	0.402532	4	177.052	-0.294501	1	13.752	-2.12	76.68	0.0344499	0.0461174	2.97	0.02	-0.294501	5.17644	-2.12	0.0461174	0.02	-0.038745	0.402532	0.227648	0.221884	0.386129	0.405089	0.310188	4	0.310188	1	1	-0.294501	0.30651	-0.0293107
2018-05-13	EGX30	16877.7	17156.8	17360.2	16869	920940000	-0.0162	-0.016307	0.0315426	0.0345736	1.77069e-05	0.216384	0.133112	0.354904	0.590428	0.566281	0.411181	4	177.052	-0.294501	1	13.566	0.77	78.754	0.0129697	0.0365413	3.06	0.09	-0.294501	5.17644	0.77	0.0365413	0.09	-0.016307	0.411181	0.100926	0.207376	0.473116	0.547455	0.332218	4	0.332218	1	1	-0.294501	0.310188	-0.038745
2018-05-20	EGX30	16634	16877.7	16937.2	16633.1	583140000	-0.0144	-0.0145439	0.0114325	0.0345736	2.49406e-05	0.24203	0.193747	0.13057	0.788084	0.667657	0.445015	4	177.052	-0.294501	1	12.926	-0.2	78.59	-0.0229717	0.0451906	2.93	-0.13	-0.294501	5.17644	-0.2	0.0451906	-0.13	-0.0145439	0.445015	0.14782	0.0332649	0.719918	0.645315	0.386579	4	0.386579	1	1	-0.294501	0.332218	-0.016307
2018-05-27	EGX30	16414.5	16634	17052.3	16335.9	740390000	-0.0132	-0.0132801	0.0120813	0.0345736	1.79366e-05	0.271895	0.135038	0.137807	0.696073	0.785708	0.438656	4	177.052	-0.294501	1	15.2125	0.24	75.3475	-0.0272612	0.0423823	2.89	-0.04	-0.294501	5.17644	0.24	0.0423823	-0.04	-0.0132801	0.438656	0.102415	0.0388818	0.605029	0.759272	0.376399	4	0.376399	1	1	-0.294501	0.386579	-0.0145439
2018-06-03	EGX30	15923.7	16414.5	16718	15781.9	660280000	-0.0299	-0.0303609	0.00792312	0.0349236	4.59818e-05	0.176318	0.370121	0.0933091	0.742948	0.407904	0.403571	4	203.351	0.138493	1	12.218	-1.28	73.978	0.00761781	0.0320595	2.93	0.04	0.138493	5.31493	-1.28	0.0320595	0.04	-0.0303609	0.403571	0.284222	0.0048046	0.663558	0.39457	0.336789	4	0.336789	1	1	0.138493	0.376399	-0.0132801
2018-06-10	EGX30	16220.9	15925.3	16282.6	15874.5	470600000	0.0187	0.0184963	0.0204775	0.0349236	3.93037e-05	0.186722	0.314144	0.233357	0.853935	0.449029	0.462616	4	203.351	0.138493	1	12.346	-0.2	74.26	-0.0420098	0.0386301	2.93	0	0.138493	5.31493	-0.2	0.0386301	0	0.0184963	0.462616	0.24093	0.1135	0.802141	0.434268	0.39771	4	0.39771	1	1	0.138493	0.336789	-0.0303609
2018-06-17	EGX30	16345.8	16237	16351.2	16021.9	469100000	0.0077	0.00766676	0.0217766	0.0349236	1.63436e-05	0.183122	0.121684	0.24785	0.854812	0.434799	0.414786	4	203.351	0.138493	1	13.372	1.79	74.116	0.0226518	0.0453706	2.9	-0.03	0.138493	5.31493	1.79	0.0453706	-0.03	0.00766676	0.414786	0.0920881	0.124747	0.803237	0.420532	0.360151	4	0.360151	1	1	0.138493	0.39771	0.0184963
2018-06-24	EGX30	16348.5	16350	16571.9	16142.7	759040000	0.0002	0.00017006	0.0209654	0.0349236	2.24046e-07	0.16545	0	0.2388	0.685161	0.364944	0.322226	4	203.351	0.138493	1	16.82	2.32	75.238	0.0499078	0.0401049	2.85	-0.05	0.138493	5.31493	2.32	0.0401049	-0.05	0.00017006	0.322226	0	0.117724	0.591403	0.353099	0.265556	4	0.265556	1	1	0.138493	0.360151	0.00766676
2018-07-01	EGX30	16125.3	16382.2	16456.7	16099.2	801220000	-0.0137	-0.0137473	0.0135439	0.0349236	1.71579e-05	0.205831	0.12851	0.15601	0.66048	0.524566	0.367392	4	243.921	0.181909	1	15.02	-2.72	76.328	-0.032282	0.0346057	2.82	-0.03	0.181909	5.49684	-2.72	0.0346057	-0.03	-0.0137473	0.367392	0.0973672	0.0534685	0.560585	0.507186	0.304652	4	0.304652	1	1	0.181909	0.265556	0.00017006
2018-07-08	EGX30	15879.8	16127.4	16242.1	15499.4	802180000	-0.0152	-0.0153435	0.0111098	0.0349236	1.91272e-05	0.165994	0.145018	0.128858	0.659918	0.367098	0.325223	4	243.921	0.181909	1	12.744	-1.19	75.29	-0.0116709	0.0674792	2.83	0.01	0.181909	5.49684	-1.19	0.0674792	0.01	-0.0153435	0.325223	0.110133	0.0323949	0.559884	0.355178	0.264398	4	0.264398	1	1	0.181909	0.304652	-0.0137473
2018-07-15	EGX30	15416.3	15883.9	15925.1	15416.3	439260000	-0.0292	-0.0296225	0.0121806	0.0349236	6.74372e-05	0.14507	0.549967	0.140803	0.872273	0.284387	0.461857	4	243.921	0.181909	1	12.544	0.68	71.27	-0.0290233	0.0472162	2.89	0.06	0.181909	5.49684	0.68	0.0472162	0.06	-0.0296225	0.461857	0.423309	0.0416658	0.825038	0.275336	0.391337	4	0.391337	1	1	0.181909	0.264398	-0.0153435
2018-07-22	EGX30	15199.3	15416.3	15559.3	15092.1	592340000	-0.0141	-0.0141773	0.00762974	0.0349236	2.39344e-05	0.104603	0.185313	0.0900364	0.782701	0.124425	0.295619	4	243.921	0.181909	1	12.498	0.17	74	0.0388253	0.0235794	2.96	0.07	0.181909	5.49684	0.17	0.0235794	0.07	-0.0141773	0.295619	0.141297	0.00226455	0.713196	0.120921	0.24442	4	0.24442	1	1	0.181909	0.391337	-0.0296225
2018-07-29	EGX30	15806.4	15200.2	15812.5	15200.2	658860000	0.0399	0.0391649	0.0302656	0.0349236	5.94435e-05	0.124038	0.482962	0.342546	0.743779	0.201251	0.442635	4	243.921	0.181909	1	12.814	-1.39	73.372	-0.0320418	0.0302345	2.95	-0.01	0.181909	5.49684	-1.39	0.0302345	-0.01	0.0391649	0.442635	0.371489	0.198244	0.664596	0.195083	0.357353	4	0.357353	1	1	0.181909	0.24442	-0.0141773
2018-08-05	EGX30	15924.1	15807.4	15983.9	15639.1	554750000	0.0074	0.00741752	0.0298075	0.0349236	1.33709e-05	0.125913	0.0967667	0.337436	0.804696	0.208664	0.361891	4	161.392	-0.413008	1	11.496	1.52	71.416	-0.0206308	0.0235376	2.87	-0.08	-0.413008	5.08384	1.52	0.0235376	-0.08	0.00741752	0.361891	0.0728175	0.194278	0.74066	0.202238	0.302498	4	0.302498	1	1	-0.413008	0.357353	0.0391649
2018-08-12	EGX30	15296	15922.3	15922.3	15287.1	463270000	-0.0394	-0.0402418	0.0336351	0.0382173	8.68646e-05	0.0888788	0.712814	0.397899	0.858224	0.0622712	0.507802	4	161.392	-0.413008	1	13.764	-0.52	69.824	-0.0121866	0.0392082	2.87	0	-0.413008	5.08384	-0.52	0.0392082	0	-0.0402418	0.507802	0.54925	0.245518	0.807496	0.0609223	0.415797	4	0.415797	1	1	-0.413008	0.302498	0.00741752
2018-08-19	EGX30	15273.4	15296	15296	15237.3	39670000	-0.0015	-0.0014773	0.0326832	0.0382173	3.72396e-05	0.0819364	0.296842	0.387281	1	0.0348288	0.429738	4	161.392	-0.413008	1	12.4	-0.65	72.772	0.0590971	0.0277244	2.82	-0.05	-0.413008	5.08384	-0.65	0.0277244	-0.05	-0.0014773	0.429738	0.22755	0.237277	1	0.0344314	0.374815	4	0.374815	1	1	-0.413008	0.415797	-0.0402418
2018-08-26	EGX30	16009.4	15272.7	16021.6	15071.4	602950000	0.0482	0.0470646	0.0358281	0.0382173	7.80572e-05	0.0486547	0.638988	0.422362	0.776493	0	0.459461	4	161.392	-0.413008	1	12.66	0.87	76.076	0.0334356	0.0238465	2.86	0.04	-0.413008	5.08384	0.87	0.0238465	0.04	0.0470646	0.459461	0.492155	0.264505	0.705444	0	0.365526	4	0.365526	1	1	-0.413008	0.374815	-0.0014773
2018-09-02	EGX30	15803.2	15968.6	16004.8	15720.2	559290000	-0.0129	-0.0129661	0.0364703	0.0382173	2.31832e-05	0.080672	0.179016	0.429527	0.80204	0.029831	0.360104	4	132.234	-0.19926	0	14.15	2.02	76.644	-0.0182312	0.0208706	2.94	0.08	-0.19926	4.88458	2.02	0.0208706	0.08	-0.0129661	0.360104	0.136427	0.270066	0.737343	0.0296069	0.293361	4	0.293361	1	1	-0.19926	0.365526	0.0470646
2018-09-09	EGX30	15308.6	15803.5	15817.6	15308.6	353440000	-0.0313	-0.0317945	0.0336457	0.0382173	8.99572e-05	0.0688264	0.738738	0.398017	0.922488	0	0.514811	4	132.234	-0.19926	0	12.992	-2.81	78.108	0.0302461	0.0450314	2.99	0.05	-0.19926	4.88458	-2.81	0.0450314	0.05	-0.0317945	0.514811	0.569298	0.24561	0.88774	0	0.425662	4	0.425662	1	1	-0.19926	0.293361	-0.0129661
2018-09-16	EGX30	14083.5	15299.2	15299.2	14054.5	717090000	-0.08	-0.0834136	0.053874	0.0541335	0.000116322	0.0734411	0.959738	0.668254	0.709707	0.00124829	0.584737	4	132.234	-0.19926	0	12.34	-0.39	78.966	0.0131405	0.0149866	3.07	0.08	-0.19926	4.88458	-0.39	0.0149866	0.08	-0.0834136	0.584737	0.740214	0.508219	0.622052	0.00201541	0.468125	4	0.468125	1	1	-0.19926	0.425662	-0.0317945
2018-09-23	EGX30	14632.4	14084.2	14647.8	14084.2	576730000	0.039	0.0382358	0.0502546	0.0541335	6.62975e-05	0.0749683	0.540414	0.668254	0.791835	0.00728492	0.501947	4	132.234	-0.19926	0	12.408	0.44	81.846	0.0472802	0.0335021	3.05	-0.02	-0.19926	4.88458	0.44	0.0335021	-0.02	0.0382358	0.501947	0.415921	0.476883	0.724601	0.00784271	0.406312	4	0.406312	1	1	-0.19926	0.468125	-0.0834136
2018-09-30	EGX30	14104.9	14633.1	14811	14070.5	462900000	-0.0361	-0.036716	0.0501581	0.0541335	7.93173e-05	0.052118	0.649551	0.668064	0.85844	0	0.544014	4	132.234	-0.19926	0	12.94	2.7	85.442	0.0286006	0.0307689	3.23	0.18	-0.19926	4.88458	2.7	0.0307689	0.18	-0.036716	0.544014	0.500324	0.476047	0.807767	0	0.446034	4	0.446034	1	1	-0.19926	0.406312	0.0382358
2018-10-07	EGX30	13283.3	14107.4	14110.6	13174.1	448410000	-0.0582	-0.0600139	0.0527102	0.0612231	0.000133837	0.0193483	1	0.706493	0.866919	0	0.643353	4	165.678	0.225472	1	20.178	6.49	83.052	-0.0531995	0.0380102	3.15	-0.08	0.225472	5.11005	6.49	0.0380102	-0.08	-0.0600139	0.643353	0.853756	0.537107	0.818353	0	0.552304	4	0.552304	1	1	0.225472	0.446034	-0.036716
2018-10-14	EGX30	13644.2	13283.6	13845.2	13283.6	503160000	0.0272	0.0268032	0.0478854	0.0612231	5.32698e-05	0.063294	0.431212	0.680951	0.834883	0	0.486761	4	165.678	0.225472	1	19.254	-1.42	80.406	-0.00409709	0.0106168	3.2	0.05	0.225472	5.11005	-1.42	0.0106168	0.05	0.0268032	0.486761	0.331467	0.495335	0.778352	0	0.401289	4	0.401289	1	1	0.225472	0.552304	-0.0600139
2018-10-21	EGX30	13023.7	13602.2	13669.4	12991.3	550880000	-0.0455	-0.0465385	0.0384835	0.063322	8.44803e-05	0.0566898	0.692828	0.58739	0.806961	0	0.521795	4	165.678	0.225472	1	22.792	4.27	78.232	-0.0377786	0.0281783	3.08	-0.12	0.225472	5.11005	4.27	0.0281783	-0.12	-0.0465385	0.521795	0.533794	0.425469	0.743487	0	0.425688	4	0.425688	1	1	0.225472	0.401289	0.0268032
2018-10-28	EGX30	13202.3	13030.4	13378.6	12956.3	630770000	0.0137	0.0136195	0.0431205	0.063322	2.15919e-05	0.0441319	0.165677	0.639117	0.760215	0	0.391252	4	165.678	0.225472	1	21.626	-4.65	74.088	-0.0847588	0.0561364	3.22	0.14	0.225472	5.11005	-4.65	0.0561364	0.14	0.0136195	0.391252	0.126111	0.465616	0.685119	0	0.319211	4	0.319211	1	1	0.225472	0.425688	-0.0465385
2018-11-04	EGX30	13732.7	13202.1	13746.3	13161.5	868100000	0.0402	0.0393858	0.0380537	0.063322	4.53701e-05	0.0271094	0.364994	0.582596	0.621347	0	0.392234	4	152.906	-0.0802244	1	18.062	-2.15	70.344	-0.0299766	0.0387013	3.19	-0.03	-0.0802244	5.02982	-2.15	0.0387013	-0.03	0.0393858	0.392234	0.280257	0.421748	0.511722	0	0.303432	4	0.303432	1	1	-0.0802244	0.319211	0.0136195
2018-11-11	EGX30	13681.7	13735.1	13776.7	13465	843090000	-0.0037	-0.00372141	0.0361226	0.063322	4.41402e-06	0.0229396	0.0216871	0.561054	0.635981	0	0.30468	4	152.906	-0.0802244	1	19.968	0.78	66.208	-0.0554125	0.0672124	3.08	-0.11	-0.0802244	5.02982	0.78	0.0672124	-0.11	-0.00372141	0.30468	0.0147532	0.405029	0.529995	0	0.237444	4	0.237444	1	1	-0.0802244	0.303432	0.0393858
2018-11-18	EGX30	13675.4	13714.8	14005.3	13675.4	630500000	-0.0005	-0.000460576	0.0196203	0.063322	7.30494e-07	0.021733	0	0.376965	0.760373	0	0.284334	4	152.906	-0.0802244	1	21.225	3.38	61.218	-0.123755	0.0740442	3.05	-0.03	-0.0802244	5.02982	3.38	0.0740442	-0.03	-0.000460576	0.284334	0	0.262153	0.685316	0	0.236867	4	0.236867	1	1	-0.0802244	0.237444	-0.00372141
2018-11-25	EGX30	13319.5	13559.3	13559.3	13040.3	662310000	-0.026	-0.0263673	0.0273314	0.063322	3.98111e-05	0.0167674	0.318397	0.462985	0.74176	0	0.380785	4	152.906	-0.0802244	1	18.654	-3.45	58.65	0.00034662	0.0453623	3.01	-0.04	-0.0802244	5.02982	-3.45	0.0453623	-0.04	-0.0263673	0.380785	0.244219	0.328915	0.662075	0	0.308802	4	0.308802	1	1	-0.0802244	0.236867	-0.000460576
2018-12-02	EGX30	12387.6	13305.1	13305.1	12387.6	466540000	-0.07	-0.0725348	0.0332366	0.0719874	0.000155474	0.0260417	1	0.575597	0.85631	0	0.607977	4	174.6	0.132676	1	20.4	5.16	60.466	0.0670155	0.0992758	2.85	-0.16	0.132676	5.1625	5.16	0.0992758	-0.16	-0.0725348	0.607977	0.994019	0.427666	0.805107	0	0.556698	4	0.556698	1	1	0.132676	0.308802	-0.0263673
2018-12-09	EGX30	12996.9	12387.8	13019.8	12076.8	534760000	0.0492	0.0480157	0.0503426	0.0719874	8.97893e-05	0.0201511	0.73733	0.764552	0.816393	0	0.579569	4	174.6	0.132676	1	21.628	-1.6	59.51	-0.0523941	0.0306478	2.89	0.04	0.132676	5.1625	-1.6	0.0306478	0.04	0.0480157	0.579569	0.56821	0.575769	0.755265	0	0.474811	4	0.474811	1	1	0.132676	0.556698	-0.0725348
2018-12-16	EGX30	13137.6	12998.3	13223.6	12910	582580000	0.0108	0.0107667	0.0515609	0.0719874	1.84811e-05	0.0454137	0.139602	0.764552	0.788412	0	0.423142	4	174.6	0.132676	1	26.834	8.48	54.644	-0.120155	0.0701168	2.79	-0.1	0.132676	5.1625	8.48	0.0701168	-0.1	0.0107667	0.423142	0.105945	0.586316	0.720327	0	0.353147	4	0.353147	1	1	0.132676	0.474811	0.0480157
2018-12-23	EGX30	12984.2	13135.1	13152.9	12634.7	316900000	-0.0117	-0.0117428	0.0505243	0.0719874	3.70553e-05	0.0434189	0.295297	0.764552	0.943869	0	0.500929	4	174.6	0.132676	1	31.195	-1.77	51.03	-0.0265381	0.0199362	2.72	-0.07	0.132676	5.1625	-1.77	0.0199362	-0.07	-0.0117428	0.500929	0.226355	0.577342	0.914436	0	0.429533	4	0.429533	1	1	0.132676	0.353147	0.0107667
2018-12-30	EGX30	13264.7	12983.3	13288.5	12943.6	302940000	0.0216	0.0213724	0.0248063	0.0719874	7.05498e-05	0.0313107	0.576059	0.481554	0.952037	0	0.502413	4	174.6	0.132676	1	23.8675	-6.96	54.31	0.0955439	0.081571	2.67	-0.05	0.132676	5.1625	-6.96	0.081571	-0.05	0.0213724	0.502413	0.443487	0.354677	0.924636	0	0.4307	4	0.4307	1	1	0.132676	0.429533	-0.0117428
2019-01-06	EGX30	13367.4	13264.7	13510.5	13264.7	410690000	0.0077	0.00771553	0.0138149	0.0719874	1.87867e-05	0.0255722	0.142164	0.358942	0.88899	0	0.347524	4	192.411	0.0971363	1	19.908	-3.19	58.636	0.0626946	0.0575269	2.71	0.04	0.0971363	5.25964	-3.19	0.0575269	0.04	0.00771553	0.347524	0.107926	0.259515	0.845912	0	0.303338	4	0.303338	1	1	0.0971363	0.4307	0.0213724
2019-01-13	EGX30	13483	13367.4	13581.1	13335.8	5.1306e+08	0.0086	0.00860699	0.0136614	0.0719874	1.67758e-05	0.0410356	0.125307	0.35723	0.82909	0	0.327907	4	192.411	0.0971363	1	18.514	-0.39	59.83	0.0461823	0.0416853	2.79	0.08	0.0971363	5.25964	-0.39	0.0416853	0.08	0.00860699	0.327907	0.0948901	0.258186	0.771119	0	0.281049	4	0.281049	1	1	0.0971363	0.303338	0.00771553
2019-01-20	EGX30	13506.6	13483	13622.3	13385.4	327630000	0.0018	0.00175327	0.00825475	0.0719874	5.35136e-06	0.0607503	0.0295442	0.296917	0.93759	0	0.316013	4	192.411	0.0971363	1	19.1575	-0.38	61.342	-0.00890478	0.0220637	2.76	-0.03	0.0971363	5.25964	-0.38	0.0220637	-0.03	0.00175327	0.316013	0.0208297	0.211375	0.906597	0	0.2847	4	0.2847	1	1	0.0971363	0.281049	0.00860699
2019-01-27	EGX30	14126.7	13506.6	14152.1	13506	949060000	0.0459	0.0448831	0.0196657	0.0719874	4.72921e-05	0.0614791	0.381105	0.42421	0.573975	0	0.344822	4	192.411	0.0971363	1	17.674	-1.28	61.38	0.00599921	0.0412611	2.7	-0.06	0.0971363	5.25964	-1.28	0.0412611	-0.06	0.0448831	0.344822	0.292716	0.31017	0.452571	0	0.263864	4	0.263864	1	1	0.0971363	0.2847	0.00175327
2019-02-03	EGX30	14753.7	14126.7	14810	14126.7	3030000000	0.0444	0.0434273	0.0226833	0.0719874	1.43325e-05	0.0653772	0.104827	0.457872	0	0	0.140675	4	160.605	-0.180686	1	15.754	-0.42	61.706	-0.00795265	0.0251263	2.63	-0.07	-0.180686	5.07895	-0.42	0.0251263	-0.07	0.0434273	0.140675	0.0790508	0.336297	0	0	0.103837	4	0.103837	1	1	-0.180686	0.263864	0.0448831
2019-02-10	EGX30	14984.5	14753.7	15076.5	14745.7	728270000	0.0156	0.0155211	0.021271	0.0719874	2.13123e-05	0.0770663	0.163334	0.442117	0.703165	0.015578	0.331049	4	160.605	-0.180686	1	15.636	-0.81	63.36	0.0674165	0.0364439	2.66	0.03	-0.180686	5.07895	-0.81	0.0364439	0.03	0.0155211	0.331049	0.124299	0.324069	0.613884	0.0158482	0.269525	4	0.269525	1	1	-0.180686	0.103837	0.0434273
2019-02-17	EGX30	15146.7	14984.5	15321.2	14984.5	1100000000	0.0108	0.0107697	0.0180181	0.0719874	9.79062e-06	0.0772742	0.0667555	0.40583	0.485656	0.0164	0.24366	4	160.605	-0.180686	1	14.2175	-1.4	66.582	0.0190108	0.0203192	2.65	-0.01	-0.180686	5.07895	-1.4	0.0203192	-0.01	0.0107697	0.24366	0.0496078	0.295905	0.342293	0.0166417	0.176112	4	0.176112	1	1	-0.180686	0.269525	0.0155211
2019-02-24	EGX30	14804	15146.7	15146.7	14772.3	1290000000	-0.0226	-0.022888	0.0271932	0.0719874	1.77426e-05	0.124948	0.133412	0.508182	0.374481	0.204848	0.305231	4	160.605	-0.180686	1	14.614	0.06	64.564	-0.0490069	0.0524153	2.76	0.11	-0.180686	5.07895	0.06	0.0524153	0.11	-0.022888	0.305231	0.101158	0.375343	0.203476	0.198555	0.219633	4	0.219633	1	1	-0.180686	0.176112	0.0107697
2019-03-03	EGX30	14904	14804	14936.6	14641.9	794380000	0.0068	0.00673626	0.0173246	0.0719874	8.47989e-06	0.114295	0.0557686	0.398094	0.664482	0.162736	0.32027	4	118.275	-0.30594	0	15.55	2.48	64.734	0.0301484	0.0185963	2.62	-0.14	-0.30594	4.77301	2.48	0.0185963	-0.14	0.00673626	0.32027	0.0411108	0.289901	0.565583	0.157903	0.263625	4	0.263625	0.999999	1	-0.30594	0.219633	-0.022888
2019-03-10	EGX30	14991.3	14904	15209.1	14904	1190000000	0.0059	0.00584105	0.0154843	0.0719874	4.90845e-06	0.0787966	0.0258316	0.377564	0.432994	0.0224177	0.214702	4	118.275	-0.30594	0	13.578	-3.17	65.714	0.00683011	0.0139528	2.59	-0.03	-0.30594	4.77301	-3.17	0.0139528	-0.03	0.00584105	0.214702	0.0179585	0.273968	0.276537	0.0224508	0.147729	4	0.147729	0.999999	1	-0.30594	0.263625	0.00673626
2019-03-17	EGX30	14782.8	14991.3	15083.3	14603.9	591420000	-0.0139	-0.0140077	0.0147391	0.0719874	2.36848e-05	0.151736	0.183221	0.369252	0.78324	0.310737	0.411613	4	118.275	-0.30594	0	14.136	3.6	67.344	0.00271903	0.0365356	2.44	-0.15	-0.30594	4.77301	3.6	0.0365356	-0.15	-0.0140077	0.411613	0.139679	0.267516	0.713868	0.300772	0.355459	4	0.355459	0.999999	1	-0.30594	0.147729	0.00584105
2019-03-24	EGX30	14665.8	14782.8	14899	14469.8	669020000	-0.0079	-0.00794608	0.0102773	0.0719874	1.18772e-05	0.148826	0.0842459	0.319479	0.737834	0.299234	0.360198	4	118.275	-0.30594	0	14.86	-2.77	67.248	0.0244387	0.0373619	2.41	-0.03	-0.30594	4.77301	-2.77	0.0373619	-0.03	-0.00794608	0.360198	0.0631343	0.228887	0.657173	0.289668	0.309715	4	0.309715	0.999999	1	-0.30594	0.355459	-0.0140077
2019-03-31	EGX30	15247.8	14665.8	15257.6	14665.8	564110000	0.0397	0.038917	0.0236502	0.0719874	6.89882e-05	0.112786	0.562969	0.468658	0.799219	0.156774	0.496905	4	118.275	-0.30594	0	13.38	-0.89	69.54	0.029017	0.0218617	2.5	0.09	-0.30594	4.77301	-0.89	0.0218617	0.09	0.038917	0.496905	0.433364	0.344668	0.733821	0.152148	0.416	4	0.416	0.999999	1	-0.30594	0.309715	-0.00794608
2019-04-07	EGX30	15106	15247.8	15262.1	15012.9	635520000	-0.0093	-0.00934652	0.0248109	0.0719874	1.47069e-05	0.0535239	0.107965	0.481606	0.757436	0	0.336752	4	107.105	-0.0992007	0	13.158	-0.81	71.328	0.0231813	0.0198862	2.56	0.06	-0.0992007	4.67381	-0.81	0.0198862	0.06	-0.00934652	0.336752	0.0814781	0.354717	0.681648	0	0.279461	4	0.279461	0.999994	1	-0.0992007	0.416	0.038917
2019-04-14	EGX30	14876.4	15106	15159.2	14852.7	389000000	-0.0152	-0.0153153	0.0250974	0.0719874	3.9371e-05	0.0722527	0.314708	0.484802	0.901681	0	0.425298	4	107.105	-0.0992007	0	12.2975	0.08	70.8725	-0.012089	0.0127326	2.57	0.01	-0.0992007	4.67381	0.08	0.0127326	0.01	-0.0153153	0.425298	0.241367	0.357197	0.861759	0	0.365081	4	0.365081	0.999994	1	-0.0992007	0.279461	-0.00934652
2019-04-21	EGX30	14770.3	14876.4	14896.5	14635.4	200910000	-0.0071	-0.00715767	0.0250006	0.0719874	3.56263e-05	0.0302845	0.283318	0.483722	1	0	0.44176	4	107.105	-0.0992007	0	12.764	0.64	72.932	0.00451532	0.0767643	2.51	-0.06	-0.0992007	4.67381	0.64	0.0767643	-0.06	-0.00715767	0.44176	0.217091	0.356359	0.99918	0	0.393158	4	0.393158	0.999994	1	-0.0992007	0.365081	-0.0153153
2019-04-28	EGX30	14880.4	14770.3	14977.9	14770.3	77640000	0.0075	0.00742786	0.00965373	0.0719874	9.56706e-05	0.057763	0.786628	0.312523	1	0	0.524788	4	107.105	-0.0992007	0	13.664	0.14	71.586	0.0128691	0.0314756	2.54	0.03	-0.0992007	4.67381	0.14	0.0314756	0.03	0.00742786	0.524788	0.606336	0.223487	1	0	0.457456	4	0.457456	0.999994	1	-0.0992007	0.393158	-0.00715767
2019-05-05	EGX30	14060	14880.4	14882.6	13821.8	338680000	-0.0551	-0.0567104	0.0275065	0.0719874	0.000167445	0.133941	1	0.511676	0.931125	0.240395	0.670799	4	211.711	0.681414	1	17.86	3.17	71.252	-0.00445745	0.0209339	2.47	-0.07	0.681414	5.35522	3.17	0.0209339	-0.07	-0.0567104	0.670799	1	0.378055	0.898524	0.232869	0.627362	4	0.627362	1	1	0.681414	0.457456	0.00742786
2019-05-12	EGX30	13659.7	14060	14165.7	13643.4	319210000	-0.0285	-0.0288818	0.0279086	0.0719874	9.0479e-05	0.15549	0.743111	0.516162	0.942517	0.325576	0.631842	4	211.711	0.681414	1	17.26	-0.08	73.322	0.03174	0.0272887	2.39	-0.08	0.681414	5.35522	-0.08	0.0272887	-0.08	-0.0288818	0.631842	0.572681	0.381537	0.912749	0.315097	0.545516	4	0.545516	1	1	0.681414	0.627362	-0.0567104
2019-05-19	EGX30	13776.9	13659.7	13783.2	13377.2	287120000	0.0086	0.00853756	0.0314447	0.0719874	2.97352e-05	0.146205	0.233937	0.555609	0.961294	0.288873	0.509928	4	211.711	0.681414	1	15.756	-0.11	70.888	-0.0840404	0.0540928	2.32	-0.07	0.681414	5.35522	-0.11	0.0540928	-0.07	0.00853756	0.509928	0.178901	0.412152	0.936194	0.279666	0.451728	4	0.451728	1	1	0.681414	0.545516	-0.0288818
2019-05-26	EGX30	13771.3	13776.9	14087.2	13771.3	440820000	-0.0004	-0.000402205	0.0295713	0.0719874	9.12401e-07	0.136081	0	0.53471	0.87136	0.248855	0.413731	4	211.711	0.681414	1	17.8525	2.86	69.29	-0.0178099	0.0543872	2.14	-0.18	0.681414	5.35522	2.86	0.0543872	-0.18	-0.000402205	0.413731	0	0.395932	0.823899	0.241036	0.365217	4	0.365217	1	1	0.681414	0.451728	0.00853756
2019-06-02	EGX30	13787.8	13771.3	13787.8	13683.8	113360000	0.0012	0.0011967	0.016463	0.0719874	1.05566e-05	0.143632	0.0731765	0.388483	1	0.278702	0.43509	4	245.62	0.148564	1	16.83	-2.41	63.146	-0.0409593	0.0647908	2.09	-0.05	0.148564	5.50379	-2.41	0.0647908	-0.05	0.0011967	0.43509	0.0545736	0.282442	1	0.269848	0.401716	4	0.401716	1	1	0.148564	0.365217	-0.000402205
2019-06-09	EGX30	14180.5	13787.8	14286.6	13785.3	5.1566e+08	0.0285	0.0280858	0.0130801	0.0719874	5.44656e-05	0.124166	0.441236	0.350746	0.827569	0.201755	0.455326	4	245.62	0.148564	1	15.788	-1.02	63.188	-0.0152483	0.0418039	2.09	0	0.148564	5.50379	-1.02	0.0418039	0	0.0280858	0.455326	0.33922	0.253153	0.76922	0.195569	0.38929	4	0.38929	1	1	0.148564	0.401716	0.0011967
2019-06-16	EGX30	14043.4	14180.5	14268.6	14028	364250000	-0.0097	-0.00971594	0.0162582	0.0719874	2.66738e-05	0.139611	0.208276	0.386198	0.916163	0.262809	0.443361	4	245.62	0.148564	1	14.996	0.12	64.038	0.0443071	0.0447587	2.07	-0.02	0.148564	5.50379	0.12	0.0447587	-0.02	-0.00971594	0.443361	0.159055	0.280668	0.879842	0.254506	0.393518	4	0.393518	1	1	0.148564	0.38929	0.0280858
2019-06-23	EGX30	14100.7	14043.4	14150.1	13814.8	683010000	0.0041	0.00407332	0.0159324	0.0719874	5.96378e-06	0.144649	0.0346777	0.382563	0.729648	0.282721	0.357402	4	245.62	0.148564	1	15.73	-0.32	66.51	0.0229206	0.0252392	2	-0.07	0.148564	5.50379	-0.32	0.0252392	-0.07	0.00407332	0.357402	0.0247998	0.277848	0.646951	0.273728	0.305832	4	0.305832	1	1	0.148564	0.393518	-0.00971594
2019-06-30	EGX30	13997.4	14100.7	14178.3	13996	541500000	-0.0073	-0.00735568	0.0172916	0.0719874	1.35839e-05	0.152106	0.0985519	0.397726	0.812449	0.312199	0.405232	4	245.62	0.148564	1	13.21	-1.8	63.84	-0.0499535	0.0545623	2.04	0.04	0.148564	5.50379	-1.8	0.0545623	0.04	-0.00735568	0.405232	0.0741982	0.289616	0.75034	0.302183	0.354084	4	0.354084	1	1	0.148564	0.305832	0.00407332
2019-07-07	EGX30	13813.6	13997.4	14145.4	13812.6	961360000	-0.0131	-0.0132209	0.00748393	0.0719874	1.37523e-05	0.169104	0.0999633	0.288318	0.566778	0.37939	0.333612	4	190.567	-0.253783	1	13.28	-0.89	65.978	0.0369847	0.0422451	2.12	0.08	-0.253783	5.25	-0.89	0.0422451	0.08	-0.0132209	0.333612	0.0752897	0.205623	0.443585	0.367044	0.272886	4	0.272886	1	1	-0.253783	0.354084	-0.00735568
2019-07-14	EGX30	13670.3	13813.6	13881.4	13520.8	524270000	-0.0104	-0.0104273	0.00759177	0.0719874	1.98892e-05	0.173725	0.151405	0.289521	0.822531	0.397656	0.415278	4	190.567	-0.253783	1	13.498	2.06	63.628	-0.0879257	0.0608237	2.05	-0.07	-0.253783	5.25	2.06	0.0608237	-0.07	-0.0104273	0.415278	0.115073	0.205635	0.762929	0.384677	0.367079	4	0.367079	1	1	-0.253783	0.272886	-0.0132209
2019-07-21	EGX30	13510.1	13670.3	13699.5	13510.1	311300000	-0.0117	-0.0117888	0.00250327	0.0719874	3.78696e-05	0.179451	0.302122	0.264552	0.947145	0.420291	0.483528	4	190.567	-0.253783	1	12.622	-2.29	62.8	0.022997	0.0338224	2.08	0.03	-0.253783	5.25	-2.29	0.0338224	0.03	-0.0117888	0.483528	0.231634	0.205623	0.918528	0.406527	0.440578	4	0.440578	1	1	-0.253783	0.367079	-0.0104273
2019-07-28	EGX30	13525.9	13510.1	13562.7	13212.4	497140000	0.0012	0.00117399	0.00659258	0.0719874	2.36149e-06	0.230423	0.00448214	0.278375	0.838405	0.621772	0.435759	4	190.567	-0.253783	1	15.674	5.45	62.586	-0.0216872	0.0420121	1.86	-0.22	-0.253783	5.25	5.45	0.0420121	-0.22	0.00117399	0.435759	0.00144746	0.205623	0.78275	0.601022	0.397711	4	0.397711	1	1	-0.253783	0.440578	-0.0117888
2019-08-04	EGX30	14180.4	13525.9	14180.4	13503.5	697460000	0.0484	0.047255	0.0277509	0.0719874	6.77529e-05	0.201051	0.552614	0.514403	0.721193	0.505673	0.573471	4	262.222	0.319188	1	19.826	0.36	57.328	-0.0633176	0.0769392	1.74	-0.12	0.319188	5.56919	0.36	0.0769392	-0.12	0.047255	0.573471	0.425356	0.380171	0.636394	0.488948	0.482717	4	0.482717	1	1	0.319188	0.397711	0.00117399
2019-08-11	EGX30	14295.1	14180.4	14540.6	14180.4	267910000	0.0081	0.00805537	0.0254221	0.0719874	3.00674e-05	0.203662	0.236722	0.488424	0.972534	0.515992	0.553418	4	262.222	0.319188	1	20.072	0.5	58.252	0.0280159	0.0657053	1.55	-0.19	0.319188	5.56919	0.5	0.0657053	-0.19	0.00805537	0.553418	0.181055	0.360009	0.950229	0.498909	0.497551	4	0.497551	1	1	0.319188	0.482717	0.047255
2019-08-18	EGX30	14333.2	14295.1	14477.1	14280.8	859090000	0.0027	0.00265681	0.0218475	0.0719874	3.09259e-06	0.183132	0.0106105	0.448548	0.626619	0.434841	0.380155	4	262.222	0.319188	1	17.346	1.4	59.574	-0.00612039	0.0399007	1.52	-0.03	0.319188	5.56919	1.4	0.0399007	-0.03	0.00265681	0.380155	0.00618693	0.32906	0.518305	0.420572	0.318531	4	0.318531	1	1	0.319188	0.497551	0.00805537
2019-08-25	EGX30	14835.4	14333.2	14838.5	14239.9	726360000	0.035	0.0344378	0.0212624	0.0719874	4.74115e-05	0.226764	0.382105	0.442022	0.704283	0.607312	0.53393	4	262.222	0.319188	1	19.168	-0.89	59.826	0.0401123	0.0344168	1.5	-0.02	0.319188	5.56919	-0.89	0.0344168	-0.02	0.0344378	0.53393	0.29349	0.323995	0.615279	0.587063	0.454957	4	0.454957	1	1	0.319188	0.318531	0.00265681
2019-09-01	EGX30	14933.2	14835.4	15123	14821	502720000	0.0066	0.00657206	0.0145179	0.0719874	1.3073e-05	0.234773	0.0942695	0.366784	0.83514	0.638969	0.483791	4	187.871	-0.333437	1	17.065	-3.98	60.228	0.00392414	0.0748068	1.55	0.05	-0.333437	5.23576	-3.98	0.0748068	0.05	0.00657206	0.483791	0.0708863	0.265601	0.778674	0.617622	0.433196	4	0.433196	1	1	-0.333437	0.454957	0.0344378
2019-09-08	EGX30	15110.4	14933.2	15117.5	14879.2	370000000	0.0119	0.0117957	0.0142166	0.0719874	3.18802e-05	0.225641	0.251918	0.363423	0.912798	0.602873	0.532753	4	187.871	-0.333437	1	14.608	-1.26	62.738	-0.000489676	0.063644	1.9	0.35	-0.333437	5.23576	-1.26	0.063644	0.35	0.0117957	0.532753	0.192807	0.262992	0.875641	0.582777	0.478554	4	0.478554	1	1	-0.333437	0.433196	0.00657206
2019-09-15	EGX30	14742.1	15110.4	15127.3	14694.3	539920000	-0.0244	-0.024676	0.0243542	0.0630863	4.5703e-05	0.207538	0.367784	0.428502	0.813374	0.531312	0.535243	4	187.871	-0.333437	1	14.486	1.58	65.556	0.0629556	0.121118	1.74	-0.16	-0.333437	5.23576	1.58	0.121118	-0.16	-0.024676	0.535243	0.282414	0.301843	0.751495	0.513698	0.462363	4	0.462363	1	1	-0.333437	0.478554	0.0117957
2019-09-22	EGX30	13857.1	14742.1	14742.1	13169.5	698630000	-0.06	-0.0619061	0.0339622	0.0648183	8.86108e-05	0.241465	0.727451	0.545024	0.720508	0.665423	0.664602	4	187.871	-0.333437	1	16.242	1.9	63.152	-0.043073	0.0308747	1.69	-0.05	-0.333437	5.23576	1.9	0.0308747	-0.05	-0.0619061	0.664602	0.56057	0.394548	0.635539	0.643159	0.558454	4	0.558454	1	1	-0.333437	0.462363	-0.024676
2019-09-29	EGX30	14217.8	13857.1	14523.7	13857.1	672790000	0.026	0.0256962	0.0393202	0.0648183	3.81935e-05	0.196733	0.304838	0.604795	0.735628	0.488602	0.533466	4	187.871	-0.333437	1	18.304	-0.18	59.222	-0.0551081	0.0500312	1.52	-0.17	-0.333437	5.23576	-0.18	0.0500312	-0.17	0.0256962	0.533466	0.233733	0.440937	0.654418	0.472469	0.450389	4	0.450389	1	1	-0.333437	0.558454	-0.0619061
2019-10-06	EGX30	14302.3	14217.8	14465.1	14180.4	435230000	0.0059	0.00592286	0.0382161	0.0637171	1.36086e-05	0.205398	0.0987588	0.586538	0.874631	0.522852	0.520695	4	195.284	0.038698	1	17.986	-1.46	59.394	0.0243915	0.0445194	1.76	0.24	0.038698	5.27445	-1.46	0.0445194	0.24	0.00592286	0.520695	0.0743582	0.425325	0.827983	0.505531	0.458299	4	0.458299	1	1	0.038698	0.450389	0.0256962
2019-10-13	EGX30	14205.9	14302.3	14314.8	14057	485880000	-0.0067	-0.00676371	0.0375513	0.0637171	1.39205e-05	0.204658	0.101374	0.579122	0.844994	0.51993	0.511355	4	195.284	0.038698	1	13.966	-1.33	59.322	-0.0104522	0.0322384	1.76	0	0.038698	5.27445	-1.33	0.0322384	0	-0.00676371	0.511355	0.0763805	0.41957	0.790977	0.50271	0.447409	4	0.447409	1	1	0.038698	0.458299	0.00592286
2019-10-20	EGX30	14206.7	14205.9	14267.6	14078.2	466440000	0.0001	5.70171e-05	0.0139758	0.0637171	1.22239e-07	0.201989	0	0.31613	0.856369	0.50938	0.42047	4	195.284	0.038698	1	13.766	-1.6	60.748	0.034424	0.0370601	1.8	0.04	0.038698	5.27445	-1.6	0.0370601	0.04	5.70171e-05	0.42047	0	0.215455	0.80518	0.492527	0.37829	4	0.37829	1	1	0.038698	0.447409	-0.00676371
2019-10-27	EGX30	14558	14206.7	14561.4	14206	704900000	0.0247	0.0244305	0.0133902	0.0637171	3.46581e-05	0.218462	0.275202	0.309597	0.716839	0.574493	0.469033	4	195.284	0.038698	1	12.832	-0.35	60.226	-0.0309278	0.0387139	1.73	-0.07	0.038698	5.27445	-0.35	0.0387139	-0.07	0.0244305	0.469033	0.210814	0.210384	0.630958	0.555382	0.401885	4	0.401885	1	1	0.038698	0.37829	5.70171e-05
2019-11-03	EGX30	14795.9	14558	14798	14558	444980000	0.0163	0.016206	0.014346	0.0637171	3.64197e-05	0.161663	0.289969	0.32026	0.868926	0.349978	0.457283	4	135.614	-0.364638	1	12.67	-0.23	62.39	0.0299605	0.0415702	1.94	0.21	-0.364638	4.90982	-0.23	0.0415702	0.21	0.016206	0.457283	0.222234	0.21866	0.820859	0.338652	0.400101	4	0.400101	1	1	-0.364638	0.401885	0.0244305
2019-11-10	EGX30	14545.5	14795.9	14831.2	14507.6	375100000	-0.0169	-0.0170637	0.0183581	0.0637171	4.5491e-05	0.163996	0.366007	0.365016	0.909814	0.359199	0.500009	4	135.614	-0.364638	1	12.694	-0.02	62.564	0.0210668	0.0179922	1.84	-0.1	-0.364638	4.90982	-0.02	0.0179922	-0.1	-0.0170637	0.500009	0.28104	0.253396	0.871915	0.347554	0.438476	4	0.438476	1	1	-0.364638	0.400101	0.016206
2019-11-17	EGX30	14094.6	14545.5	14572.8	14094.6	351880000	-0.031	-0.0314941	0.0266261	0.0637171	8.95024e-05	0.217891	0.734925	0.457248	0.923401	0.572237	0.671953	4	135.614	-0.364638	1	12.714	0.29	63.762	0.0235672	0.031241	1.77	-0.07	-0.364638	4.90982	0.29	0.031241	-0.07	-0.0314941	0.671953	0.56635	0.32498	0.888879	0.553204	0.583353	4	0.583353	1	1	-0.364638	0.438476	-0.0170637
2019-11-24	EGX30	13849.5	14094.6	14094.6	13744.6	236650000	-0.0174	-0.0175441	0.0202573	0.0637171	7.41352e-05	0.234796	0.606112	0.386202	0.990825	0.639061	0.65555	4	135.614	-0.364638	1	11.945	0.28	64.74	-0.00510324	0.0076698	1.78	0.01	-0.364638	4.90982	0.28	0.0076698	0.01	-0.0175441	0.65555	0.46673	0.26984	0.973068	0.617711	0.581837	4	0.581837	1	1	-0.364638	0.583353	-0.0314941
2019-12-01	EGX30	13622.1	13849.5	13877.4	13388.4	346440000	-0.0164	-0.0165506	0.00723205	0.0500369	4.77733e-05	0.227382	0.385138	0.167115	0.926584	0.609752	0.522147	4	121.494	-0.109952	0	14.762	1	64.714	0.0305367	0.0437829	1.84	0.06	-0.109952	4.79986	1	0.0437829	0.06	-0.0165506	0.522147	0.295835	0.0849847	0.892854	0.589418	0.465773	4	0.465773	1	1	-0.109952	0.581837	-0.0175441
2019-12-08	EGX30	13358.5	13622.1	13622.1	13353.1	170080000	-0.0194	-0.019545	0.00692008	0.0500369	0.000114917	0.201267	0.947956	0.163635	1	0.506526	0.654529	4	121.494	-0.109952	0	14.62	-0.99	66.498	0.0140364	0.0292431	1.82	-0.02	-0.109952	4.79986	-0.99	0.0292431	-0.02	-0.019545	0.654529	0.731102	0.0849847	1	0.489771	0.576464	4	0.576464	1	1	-0.109952	0.465773	-0.0165506
2019-12-15	EGX30	13837.2	13358.5	13856.7	13357.5	638700000	0.0358	0.0352093	0.0265738	0.0500369	5.51264e-05	0.184291	0.446775	0.382878	0.755575	0.43942	0.506162	4	121.494	-0.109952	0	12.404	-0.12	68.902	0.0179285	0.0238766	1.92	0.1	-0.109952	4.79986	-0.12	0.0238766	0.1	0.0352093	0.506162	0.343503	0.249341	0.679325	0.424993	0.424291	4	0.424291	1	1	-0.109952	0.576464	-0.019545
2019-12-22	EGX30	13885	13837.2	13904.7	13741	147700000	0.0035	0.00344562	0.0252049	0.0500369	2.33285e-05	0.189755	0.180235	0.367608	1	0.461018	0.502215	4	121.494	-0.109952	0	12.84	0.92	68.73	0.00363452	0.0314844	1.88	-0.04	-0.109952	4.79986	0.92	0.0314844	-0.04	0.00344562	0.502215	0.137369	0.23749	1	0.445842	0.455175	4	0.455175	1	1	-0.109952	0.424291	0.0352093
2019-12-29	EGX30	13899.5	13885	14092.5	13811.4	210510000	0.0011	0.00105023	0.0226058	0.0500369	4.98896e-06	0.194397	0.0265065	0.338614	1	0.479368	0.461122	4	121.494	-0.109952	0	13.7725	0.59	68.05	0.00246395	0.0338151	1.8	-0.08	-0.109952	4.79986	0.59	0.0338151	-0.08	0.00105023	0.461122	0.0184804	0.214987	0.992166	0.463555	0.422297	4	0.422297	1	1	-0.109952	0.455175	0.00344562
2020-01-05	EGX30	13729.8	13899.5	13899.5	13005.2	298440000	-0.0122	-0.0122864	0.0201302	0.0500369	4.11686e-05	0.215761	0.329776	0.310998	0.95467	0.563818	0.539815	4	380.597	1.14188	1	13.238	-1.46	67.93	-0.0340114	0.0363758	1.83	0.03	1.14188	5.94174	-1.46	0.0363758	0.03	-0.0122864	0.539815	0.25302	0.193554	0.927923	0.545077	0.479893	4	0.479893	1	1	1.14188	0.422297	0.00105023
2020-01-12	EGX30	13824.2	13729.8	13834.1	13698.1	339910000	0.0069	0.0068484	0.00837872	0.0500369	2.01477e-05	0.222743	0.153572	0.179907	0.930405	0.591414	0.463824	4	380.597	1.14188	1	12.31	-0.46	64.112	-0.0415898	0.0498822	1.84	0.01	1.14188	5.94174	-0.46	0.0498822	0.01	0.0068484	0.463824	0.116749	0.0918101	0.897625	0.571716	0.419475	4	0.419475	1	1	1.14188	0.479893	-0.0122864
2020-01-19	EGX30	13728.1	13824.2	13977.7	13631.7	283610000	-0.0069	-0.00697369	0.00847192	0.0500369	2.4589e-05	0.223066	0.1908	0.180946	0.963348	0.592693	0.481947	4	380.597	1.14188	1	13.325	2.46	62.2	-0.0763804	0.046059	1.7	-0.14	1.14188	5.94174	2.46	0.046059	-0.14	-0.00697369	0.481947	0.14554	0.092617	0.938758	0.572951	0.437467	4	0.437467	1	1	1.14188	0.419475	0.0068484
2020-01-26	EGX30	13918.8	13728.1	13918.8	13563.7	380700000	0.0139	0.0137992	0.0120613	0.0500369	3.6247e-05	0.228065	0.288521	0.220987	0.906538	0.612454	0.507125	4	380.597	1.14188	1	17.046	4.28	58.572	-0.026814	0.0356032	1.51	-0.19	1.14188	5.94174	4.28	0.0356032	-0.19	0.0137992	0.507125	0.221115	0.123694	0.867823	0.592026	0.451164	4	0.451164	1	1	1.14188	0.437467	-0.00697369
2020-02-02	EGX30	14105.9	13918.8	14121.5	13852.9	507370000	0.0134	0.013347	0.00968781	0.0500369	2.63062e-05	0.255696	0.205195	0.19451	0.83242	0.721673	0.488449	4	125.74	-1.10753	0	15.92	-3.37	54.594	-0.0577186	0.0736416	1.59	0.08	-1.10753	4.83421	-3.37	0.0736416	0.08	0.013347	0.488449	0.156672	0.103144	0.775276	0.697458	0.433138	4	0.433138	1	1	-1.10753	0.451164	0.0137992
2020-02-09	EGX30	13859.5	14105.9	14137.2	13840.9	340540000	-0.0175	-0.017623	0.0155578	0.0500369	5.17502e-05	0.265752	0.418474	0.259992	0.930036	0.761423	0.592481	4	125.74	-1.10753	0	14.358	-1.79	55.328	0.0507705	0.0435762	1.59	0	-1.10753	4.83421	-1.79	0.0435762	0	-0.017623	0.592481	0.321616	0.153966	0.897165	0.73583	0.527144	4	0.527144	1	1	-1.10753	0.433138	0.013347
2020-02-16	EGX30	13720.6	13859.5	13859.7	13626.4	436120000	-0.01	-0.0100653	0.0161283	0.0500369	2.30792e-05	0.273642	0.178145	0.266356	0.87411	0.792613	0.527806	4	125.74	-1.10753	0	15.4625	3.4	58.614	0.0212132	0.0452645	1.46	-0.13	-1.10753	4.83421	3.4	0.0452645	-0.13	-0.0100653	0.527806	0.135753	0.158906	0.827333	0.765938	0.471982	4	0.471982	1	1	-1.10753	0.527144	-0.017623
2020-02-23	EGX30	13008.9	13720.6	13763.2	13008.9	640070000	-0.0519	-0.0532652	0.0275955	0.0572939	8.32177e-05	0.213402	0.682245	0.433418	0.754773	0.554492	0.606232	4	125.74	-1.10753	0	31.942	23.03	54.092	-0.132849	0.0686825	1.13	-0.33	-1.10753	4.83421	23.03	0.0686825	-0.33	-0.0532652	0.606232	0.525609	0.298072	0.678324	0.536074	0.50952	4	0.50952	0.99979	1	-1.10753	0.471982	-0.0100653
2020-03-01	EGX30	12347.6	13008.9	13008.9	12181.9	717360000	-0.0508	-0.0521711	0.0226594	0.0572939	7.27265e-05	0.203854	0.594304	0.378354	0.709549	0.51675	0.549739	4	79.4008	-0.459704	0	36.758	1.83	50.702	-0.117978	0.120724	0.74	-0.39	-0.459704	4.37451	1.83	0.120724	-0.39	-0.0521711	0.549739	0.457598	0.255335	0.621855	0.499642	0.458607	4	0.458607	0.621938	1	-0.459704	0.50952	-0.0532652
2020-03-08	EGX30	11194.1	12347.6	12347.6	10913.6	653460000	-0.0934	-0.0980771	0.0359419	0.0722312	0.000150089	0.528817	1	0.607091	0.746938	1	0.838507	4	79.4008	-0.459704	0	57.792	15.89	33.724	-0.34639	0.280526	0.94	0.2	-0.459704	4.37451	15.89	0.280526	0.2	-0.0980771	0.838507	0.95911	0.452429	0.668541	1	0.77002	4	0.77002	0.37754	0	0	0.458607	-0.0521711
2020-03-15	EGX30	9205.58	11194.1	11194.1	8113.82	951540000	-0.1776	-0.195579	0.0673562	0.118521	0.000205539	0.563306	1	1	0.572524	1	0.893131	4	79.4008	-0.459704	0	74.618	8.21	25.654	-0.232881	0.262168	0.92	-0.02	-0.459704	4.37451	8.21	0.262168	-0.02	-0.195579	0.893131	1	0.961366	0.45076	1	0.853031	4	0.853031	0.219393	0	0	0.77002	-0.0980771
2020-03-22	EGX30	9912.98	9205.58	10414.6	9205.58	738510000	0.0768	0.0740352	0.111961	0.118521	0.000100249	0.584887	0.82501	1	0.697173	1	0.880546	4	79.4008	-0.459704	0	62.75	-0.5	23.962	-0.132023	0.13398	0.72	-0.2	-0.459704	4.37451	-0.5	0.13398	-0.2	0.0740352	0.880546	0.636019	0.961366	0.606402	1	0.800947	4	0.800947	0.116954	0	0	0.853031	-0.195579
2020-03-29	EGX30	9455.38	9912.98	9912.98	9399.21	538090000	-0.0462	-0.0472611	0.112218	0.118521	8.78313e-05	0.593108	0.720917	1	0.814444	1	0.88384	4	79.4008	-0.459704	0	53.078	-18.74	18.716	0.0830957	0.463066	0.62	-0.1	-0.459704	4.37451	-18.74	0.463066	-0.1	-0.0472611	0.88384	0.555516	0.961366	0.752832	1	0.817429	4	0.817429	0.0504373	0	0	0.800947	0.0740352
2020-04-05	EGX30	10322	9455.38	10382.7	9264.51	1030000000	0.0917	0.0876907	0.13167	0.118521	8.51366e-05	0.593666	0.69833	1	0.526615	1	0.806236	4	65.414	-0.193772	0	44.24	-5.13	22.5325	-0.184544	0.268479	0.73	0.11	-0.193772	4.18074	-5.13	0.268479	0.11	0.0876907	0.806236	0.538048	0.961366	0.393436	1	0.723213	4	0.723213	0.00699722	0	0	0.817429	-0.0472611
2020-04-12	EGX30	10154.6	10322	10502.9	10141.6	735530000	-0.0162	-0.0163439	0.0664948	0.118521	2.22206e-05	0.580053	0.170947	1	0.698917	1	0.717466	4	65.414	-0.193772	0	39.606	-3.52	19.995	-0.0240132	0.142446	0.65	-0.08	-0.193772	4.18074	-3.52	0.142446	-0.08	-0.0163439	0.717466	0.130187	0.961366	0.608579	1	0.675033	4	0.675033	0.0040685	0	0	0.723213	0.0876907
2020-04-19	EGX30	10120.5	10154.6	10154.6	9773.43	775480000	-0.0034	-0.00337163	0.0580072	0.118521	4.34779e-06	0.580488	0.021132	1	0.675541	1	0.674168	4	65.414	-0.193772	0	41.706	-2.22	14.236	-0.218723	0.781992	0.6	-0.05	-0.193772	4.18074	-2.22	0.781992	-0.05	-0.00337163	0.674168	0.0143239	0.897871	0.579391	1	0.622897	4	0.622897	0.00912341	0	0	0.675033	-0.0163439
2020-04-26	EGX30	10554	10120.5	10571.5	10120.5	1220000000	0.0428	0.0419496	0.047283	0.118521	3.43849e-05	0.5881	0.272913	0.967738	0.41544	1	0.664023	4	65.414	-0.193772	0	33.886	1.26	17.046	0.1528	0.147461	0.64	0.04	-0.193772	4.18074	1.26	0.147461	0.04	0.0419496	0.664023	0.209044	0.805022	0.254619	1	0.567171	4	0.567171	0.078304	0	0	0.622897	-0.00337163
2020-05-03	EGX30	10176.7	10554	10554	10069.9	835870000	-0.0358	-0.036405	0.0332334	0.118521	4.35534e-05	0.570455	0.349766	0.81101	0.640205	1	0.700245	4	104.562	0.469041	0	32.624	-9.21	23.5725	0.270361	0.247662	0.69	0.05	0.469041	4.64978	-9.21	0.247662	0.05	-0.036405	0.700245	0.268479	0.683382	0.53527	1	0.621783	4	0.621783	0.97996	1	0.469041	0.567171	0.0419496
2020-05-10	EGX30	10287.2	10176.7	10591	10161.4	703310000	0.0109	0.0107976	0.0325115	0.118521	1.53526e-05	0.56557	0.113378	0.802957	0.71777	1	0.658526	4	104.562	0.469041	0	32.078	3.91	28.182	0.244781	0.112277	0.64	-0.05	0.469041	4.64978	3.91	0.112277	-0.05	0.0107976	0.658526	0.085664	0.677131	0.63212	1	0.598729	4	0.598729	0.999555	1	0.469041	0.621783	-0.036405
2020-05-17	EGX30	10109.9	10287.2	10396.8	10064	329290000	-0.0172	-0.0173852	0.0341743	0.118521	5.27962e-05	0.562723	0.427242	0.821506	0.936619	1	0.796342	4	104.562	0.469041	0	29.102	-3.73	33.94	0.0880878	0.0934872	0.66	0.02	0.469041	4.64978	-3.73	0.0934872	0.02	-0.0173852	0.796342	0.328397	0.691528	0.905384	1	0.731327	4	0.731327	0.999981	1	0.469041	0.598729	0.0107976
2020-05-24	EGX30																		104.562	0.469041	0	27.9325	-0.65	33.7025	0.0103018	0.0528071	0.65	-0.01	0.469041	4.64978	-0.65	0.0528071	-0.01								0		0.99999	1	0.469041	0.731327	-0.0173852
2020-05-31	EGX30	10621.1	10109.9	10621.3	10109.9	710120000	0.0506	0.0493302	0.0372719	0.118521	6.94674e-05	0.569033	0.566986	0.856061	0.713785	1	0.784208	4	104.562	0.469041	0	26.212	-2.99	38.37	0.182809	0.102319	0.91	0.26	0.469041	4.64978	-2.99	0.102319	0.26	0.0493302	0.784208	0.436471	0.718347	0.627144	1	0.69549	4	0.69549	0.999991	1	0.469041
2020-06-07	EGX30	10831.9	10621.1	11215.3	10621.1	1110000000	0.0198	0.019651	0.0274786	0.118521	1.77036e-05	0.56693	0.133084	0.746814	0.479804	1	0.589926	4	139.704	0.289751	1	31.566	11.57	39.518	-0.0618754	0.0987342	0.71	-0.2	0.289751	4.93953	11.57	0.0987342	-0.2	0.019651	0.589926	0.100905	0.633557	0.334986	1	0.517362	4	0.517362	1	1	0.289751	0.69549	0.0493302
2020-06-14	EGX30	10857.9	10831.9	10955.8	10575.5	769890000	0.0024	0.00239283	0.0282778	0.118521	3.10802e-06	0.556708	0.0107398	0.755729	0.678812	1	0.61132	4	139.704	0.289751	1	33.92	-0.97	40.948	0.0937994	0.0529909	0.7	-0.01	0.289751	4.93953	-0.97	0.0529909	-0.01	0.00239283	0.61132	0.00628694	0.640477	0.583476	1	0.55756	4	0.55756	1	1	0.289751	0.517362	0.019651
2020-06-21	EGX30	10890.5	10857.9	11088.8	10695.4	1000000000	0.003	0.00299885	0.0219964	0.118521	2.99885e-06	0.553343	0.00982471	0.685657	0.544168	1	0.559912	4	139.704	0.289751	1	32.786	-0.39	41.694	-0.032656	0.0636269	0.64	-0.06	0.289751	4.93953	-0.39	0.0636269	-0.06	0.00299885	0.559912	0.00557924	0.586092	0.415354	1	0.501756	4	0.501756	1	1	0.289751	0.55756	0.00239283
2020-06-28	EGX30	10764.6	10890.5	10890.5	10744.2	644350000	-0.0116	-0.011627	0.0127942	0.118521	1.80445e-05	0.549775	0.135942	0.583003	0.752269	1	0.617804	4	139.704	0.289751	1	29.6275	-7.05	42.302	0.0464978	0.0313971	0.68	0.04	0.289751	4.93953	-7.05	0.0313971	0.04	-0.011627	0.617804	0.103115	0.50642	0.675197	1	0.571183	4	0.571183	1	1	0.289751	0.501756	0.00299885
2020-07-05	EGX30	10957	10764.6	11172.6	10764.6	1440000000	0.0179	0.0177183	0.0119844	0.118521	1.23044e-05	0.563843	0.0878266	0.573971	0.286712	1	0.487127	4	110.246	-0.236814	0	28.4	-0.39	43.06	0.00812164	0.0408369	0.65	-0.03	-0.236814	4.70271	-0.39	0.0408369	-0.03	0.0177183	0.487127	0.0659035	0.499409	0.0938839	1	0.414799	4	0.414799	0.999997	1	-0.236814	0.571183	-0.011627
2020-07-12	EGX30	10441.2	10957	11140.5	10378.2	2060000000	-0.0471	-0.0482208	0.0282876	0.118521	2.34082e-05	0.544187	0.180902	0.755838	0	1	0.484185	4	110.246	-0.236814	0	28.63	-1.61	43.404	0.0059908	0.0259104	0.64	-0.01	-0.236814	4.70271	-1.61	0.0259104	-0.01	-0.0482208	0.484185	0.137885	0.640561	0	1	0.444612	4	0.444612	0.999997	1	-0.236814	0.414799	0.0177183
2020-07-19	EGX30	10459.9	10441.2	10593.8	10272	985540000	0.0018	0.00179129	0.0281116	0.118521	1.81757e-06	0.546657	0	0.753875	0.552629	1	0.576626	4	110.246	-0.236814	0	25.108	0.16	43.568	-0.00552869	0.0349971	0.59	-0.05	-0.236814	4.70271	0.16	0.0349971	-0.05	0.00179129	0.576626	0	0.639037	0.425919	1	0.516239	4	0.516239	0.999997	1	-0.236814	0.444612	-0.0482208
2020-07-26	EGX30	10599.5	10459.9	10621.9	10459.9	676600000	0.0133	0.0132522	0.030322	0.118521	1.95865e-05	0.556968	0.148868	0.778532	0.733398	1	0.6652	4	110.246	-0.236814	0	24.7	-1.38	43.224	-0.00370285	0.0171721	0.55	-0.04	-0.236814	4.70271	-1.38	0.0171721	-0.04	0.0132522	0.6652	0.113111	0.658175	0.651635	1	0.60573	4	0.60573	0.999997	1	-0.236814	0.516239	0.00179129
2020-08-02	EGX30	10817.3	10599.5	10827.3	10596.8	914510000	0.0206	0.0203427	0.0309662	0.118521	2.22444e-05	0.574325	0.171147	0.785719	0.594191	1	0.637764	4	122.285	0.103643	0	23.178	-2.25	44.356	0.0215605	0.0340084	0.57	0.02	0.103643	4.80636	-2.25	0.0340084	0.02	0.0203427	0.637764	0.130341	0.663753	0.477814	1	0.567977	4	0.567977	1	1	0.103643	0.60573	0.0132522
2020-08-09	EGX30	10944.2	10817.3	11047	10817.3	1250000000	0.0117	0.011662	0.00764362	0.118521	9.32962e-06	0.580245	0.0628913	0.525548	0.397887	1	0.496581	4	122.285	0.103643	0	22.524	-0.16	44.538	0.0177673	0.034285	0.71	0.14	0.103643	4.80636	-0.16	0.034285	0.14	0.011662	0.496581	0.0466193	0.461827	0.232701	1	0.435287	4	0.435287	1	1	0.103643	0.567977	0.0203427
2020-08-16	EGX30	11160	10944.2	11193.7	10944.2	814110000	0.0197	0.0195326	0.00437992	0.118521	2.39926e-05	0.578529	0.185801	0.5	0.652938	1	0.584685	4	122.285	0.103643	0	22.132	0.49	44.792	-0.0207215	0.0225018	0.64	-0.07	0.103643	4.80636	0.49	0.0225018	-0.07	0.0195326	0.584685	0.141674	0.461366	0.551168	1	0.538552	4	0.538552	1	1	0.103643	0.435287	0.011662
2020-08-23	EGX30	11462.5	11160	11493.4	11160	1320000000	0.0271	0.026736	0.00617756	0.118521	2.02546e-05	0.565097	0.154468	0.509193	0.356928	1	0.505147	4	122.285	0.103643	0	23.02	0.42	45.258	0.0287144	0.0433334	0.74	0.1	0.103643	4.80636	0.42	0.0433334	0.1	0.026736	0.505147	0.117442	0.461366	0.181558	1	0.440091	4	0.440091	1	1	0.103643	0.538552	0.0195326
2020-08-30	EGX30	11180.8	11462.5	11490.4	11180.1	961630000	-0.0246	-0.0248776	0.0229355	0.118521	2.58702e-05	0.563997	0.20154	0.696133	0.56662	1	0.616073	4	122.285	0.103643	0	28.69	7.79	43.06	-0.0955313	0.0792818	0.72	-0.02	0.103643	4.80636	7.79	0.0792818	-0.02	-0.0248776	0.616073	0.153846	0.594223	0.443388	1	0.547864	4	0.547864	1	1	0.103643	0.440091	0.026736
2020-09-06	EGX30	11070.8	11180.8	11190.5	10873.7	785530000	-0.0098	-0.00988429	0.0243573	0.118521	1.2583e-05	0.457358	0.0901618	0.711994	0.669661	1	0.617954	4	123.566	0.0104204	0	29.2125	-3.88	39.45	-0.0575879	0.0697365	0.67	-0.05	0.0104204	4.81678	-3.88	0.0697365	-0.05	-0.00988429	0.617954	0.0677095	0.606533	0.572049	1	0.561573	4	0.561573	1	1	0.0104204	0.547864	-0.0248776
2020-09-13	EGX30	11050.9	11070.8	11119.8	11013.2	1220000000	-0.0018	-0.00180366	0.0216834	0.118521	1.47841e-06	0.227167	0	0.682166	0.41544	0.608905	0.426628	4	123.566	0.0104204	0	25.954	-1.04	40.77	0.0830517	0.0560585	0.7	0.03	0.0104204	4.81678	-1.04	0.0560585	0.03	-0.00180366	0.426628	0	0.583382	0.254619	0.5886	0.35665	4	0.35665	1	1	0.0104204	0.561573	-0.00988429
2020-09-20	EGX30	10911.4	11050.9	11062.3	10818.3	683750000	-0.0126	-0.0126992	0.00956316	0.118521	1.85729e-05	0.155126	0.140371	0.546961	0.729215	0.324135	0.43517	4	123.566	0.0104204	0	27.622	0.55	40.89	-0.0300974	0.0461661	0.66	-0.04	0.0104204	4.81678	0.55	0.0461661	-0.04	-0.0126992	0.43517	0.10654	0.478446	0.646411	0.313705	0.386276	4	0.386276	1	1	0.0104204	0.35665	-0.00180366
2020-09-27	EGX30	11051.3	10911.4	11065.2	10898.7	768170000	0.0128	0.0127363	0.011409	0.11564	1.658e-05	0.246908	0.123667	0.567552	0.679818	0.686935	0.514493	4	123.566	0.0104204	0	26.632	1.25	39.994	-0.0737884	0.0586064	0.7	0.04	0.0104204	4.81678	1.25	0.0586064	0.04	0.0127363	0.514493	0.0936211	0.478598	0.584732	0.663925	0.455219	4	0.455219	1	1	0.0104204	0.386276	-0.0126992
2020-10-04	EGX30	11327	11051.3	11344.8	10999.9	577510000	0.0249	0.0246394	0.016361	0.11564	4.26649e-05	0.155761	0.342318	0.622792	0.791379	0.326648	0.520784	4	122.529	-0.00843256	0	27.372	-2.63	41.06	0.0912349	0.0699591	0.79	0.09	-0.00843256	4.80835	-2.63	0.0699591	0.09	0.0246394	0.520784	0.26272	0.521471	0.724031	0.316131	0.456088	4	0.456088	1	1	-0.00843256	0.455219	0.0127363
2020-10-11	EGX30	11322.7	11327	11423.9	11282.7	904090000	-0.0004	-0.000377047	0.0161566	0.11564	4.17046e-07	0.164722	0	0.620513	0.600288	0.362067	0.395717	4	122.529	-0.00843256	0	26.384	2.41	41.32	-0.00699051	0.0370391	0.76	-0.03	-0.00843256	4.80835	2.41	0.0370391	-0.03	-0.000377047	0.395717	0	0.519702	0.485427	0.350322	0.338863	4	0.338863	1	1	-0.00843256	0.456088	0.0246394
2020-10-18	EGX30	10987.4	11322.7	11322.7	10987.1	641970000	-0.0296	-0.0300586	0.0235296	0.11564	4.68224e-05	0.169508	0.377167	0.702761	0.753661	0.380987	0.553644	4	122.529	-0.00843256	0	28.568	0.14	40.998	-0.0153568	0.0501656	0.85	0.09	-0.00843256	4.80835	0.14	0.0501656	0.09	-0.0300586	0.553644	0.289671	0.583537	0.676936	0.368586	0.479682	4	0.479682	1	1	-0.00843256	0.338863	-0.000377047
2020-10-25	EGX30	10515.2	10987.4	10987.4	10414.7	5.1906e+08	-0.043	-0.0439253	0.030671	0.11564	8.46247e-05	0.323509	0.694039	0.782426	0.825579	0.98973	0.822943	4	122.529	-0.00843256	0	36.34	10.47	37.906	-0.11383	0.0745213	0.88	0.03	-0.00843256	4.80835	10.47	0.0745213	0.03	-0.0439253	0.822943	0.53473	0.645367	0.766735	0.956219	0.725763	4	0.725763	1	1	-0.00843256	0.479682	-0.0300586
2020-11-01	EGX30	10629.3	10515.2	10637.8	10426.9	592770000	0.0108	0.0107868	0.0254233	0.11564	1.81973e-05	0.307558	0.137223	0.723885	0.78245	0.926678	0.642559	4	108.494	-0.121653	0	30.938	-13.16	38.636	0.0470454	0.0667521	0.83	-0.05	-0.121653	4.68669	-13.16	0.0667521	-0.05	0.0107868	0.642559	0.104105	0.599932	0.712882	0.895354	0.578068	4	0.578068	0.999995	1	-0.121653	0.725763	-0.0439253
2020-11-08	EGX30	11017.3	10629.3	11123	10613.1	833080000	0.0365	0.0358516	0.0367319	0.11564	4.30349e-05	0.219	0.34542	0.850036	0.641838	0.576619	0.603478	4	108.494	-0.121653	0	24.49	-1.76	41.87	0.0862452	0.0809773	0.89	0.06	-0.121653	4.68669	-1.76	0.0809773	0.06	0.0358516	0.603478	0.265119	0.697841	0.537308	0.557434	0.514425	4	0.514425	0.999995	1	-0.121653	0.578068	0.0107868
2020-11-15	EGX30	10898.7	11017.3	11076.7	10890.1	749830000	-0.0108	-0.0108242	0.0338223	0.11564	1.44355e-05	0.245432	0.105691	0.817579	0.69055	0.681104	0.573731	4	108.494	-0.121653	0	23.162	0.6	43.008	0.0534711	0.0343552	0.83	-0.06	-0.121653	4.68669	0.6	0.0343552	-0.06	-0.0108242	0.573731	0.079719	0.67265	0.598132	0.658295	0.502199	4	0.502199	0.999995	1	-0.121653	0.514425	0.0358516
2020-11-22	EGX30	10981	10898.7	11112.5	10852.7	937140000	0.0076	0.0075221	0.0192001	0.11564	8.02666e-06	0.247531	0.0519694	0.654463	0.580949	0.689399	0.494195	4	108.494	-0.121653	0	21.5975	-2.86	46.426	0.0681857	0.0528703	0.84	0.01	-0.121653	4.68669	-2.86	0.0528703	0.01	0.0075221	0.494195	0.0381727	0.546052	0.46128	0.666303	0.427952	4	0.427952	0.999995	1	-0.121653	0.502199	-0.0108242
2020-11-29	EGX30	11015	10981	11103.7	10937.9	833890000	0.0031	0.00309602	0.0195875	0.11564	3.71275e-06	0.273097	0.0158088	0.658786	0.641364	0.790456	0.526604	4	108.494	-0.121653	0	20.916	-0.05	47.828	0.0462679	0.0254116	0.97	0.13	-0.121653	4.68669	-0.05	0.0254116	0.13	0.00309602	0.526604	0.0102072	0.549407	0.536716	0.763856	0.465046	4	0.465046	0.999995	1	-0.121653	0.427952	0.0075221
2020-12-06	EGX30	10987.4	11015	11049.6	10987.4	1090000000	-0.0025	-0.00251064	0.00791177	0.11564	2.30334e-06	0.275719	0.00399469	0.528539	0.491507	0.800824	0.456216	4	105.025	-0.0324919	0	22.016	2.52	49.324	0.018364	0.0330538	0.9	-0.07	-0.0324919	4.6542	2.52	0.0330538	-0.07	-0.00251064	0.456216	0.00107048	0.448319	0.349599	0.773864	0.393213	4	0.393213	0.999991	1	-0.0324919	0.465046	0.00309602
2020-12-13	EGX30	10844.6	10987.4	11100.8	10843.5	771280000	-0.013	-0.0130828	0.00889649	0.11564	1.69625e-05	0.269559	0.126872	0.539524	0.677999	0.776473	0.530217	4	105.025	-0.0324919	0	22.722	-1.74	51.048	0.0422846	0.0230452	0.95	0.05	-0.0324919	4.6542	-1.74	0.0230452	0.05	-0.0130828	0.530217	0.0961004	0.456844	0.58246	0.750358	0.471441	4	0.471441	0.999991	1	-0.0324919	0.393213	-0.00251064
2020-12-20	EGX30	10683.9	10844.6	10895.1	10545.9	911560000	-0.0148	-0.0149312	0.00860054	0.11564	1.63799e-05	0.239214	0.121989	0.536222	0.595917	0.656523	0.477663	4	105.025	-0.0324919	0	23.5575	-0.04	50.605	-0.0250377	0.0410051	0.94	-0.01	-0.0324919	4.6542	-0.04	0.0410051	-0.01	-0.0149312	0.477663	0.0923234	0.454282	0.479969	0.634567	0.415285	4	0.415285	0.999991	1	-0.0324919	0.471441	-0.0130828
2020-12-27	EGX30	10845.3	10683.9	10897.1	10585.5	894490000	0.0151	0.0149939	0.0137225	0.11564	1.67625e-05	0.234937	0.125196	0.59336	0.605905	0.639618	0.49102	4	105.025	-0.0324919	0	22.575	1.22	50.82	0.00666016	0.0141157	0.93	-0.01	-0.0324919	4.6542	1.22	0.0141157	-0.01	0.0149939	0.49102	0.0948042	0.498628	0.492441	0.618248	0.42603	4	0.42603	0.99999	1	-0.0324919	0.415285	-0.0149312
2021-01-03	EGX30	10952.1	10845.3	10971.6	10804.2	618040000	0.0099	0.00980675	0.0154112	0.11564	1.58675e-05	0.22927	0.117694	0.612197	0.767664	0.617218	0.528693	4	93.5556	-0.115645	0	24.262	-1.19	53.308	0.0804331	0.0665732	1.13	0.2	-0.115645	4.53856	-1.19	0.0665732	0.2	0.00980675	0.528693	0.089002	0.513248	0.694419	0.596625	0.473324	4	0.473324	0.999928	1	-0.115645	0.42603	0.0149939
2021-01-10	EGX30	11453.4	10952.1	11462	10952.1	925560000	0.0458	0.0447544	0.0245013	0.11564	4.83538e-05	0.195761	0.390005	0.713601	0.587725	0.484761	0.544023	4	93.5556	-0.115645	0	23.442	2.78	55.38	-0.012873	0.0309687	1.11	-0.02	-0.115645	4.53856	2.78	0.0309687	-0.02	0.0447544	0.544023	0.299599	0.59195	0.469741	0.468761	0.457513	4	0.457513	0.999917	1	-0.115645	0.473324	0.00980675
2021-01-17	EGX30	11654.6	11453.4	11675.7	11420.7	993170000	0.0176	0.01741	0.0156666	0.11564	1.75297e-05	0.190927	0.131627	0.615046	0.548165	0.465652	0.440123	4	93.5556	-0.115645	0	22.0125	-2.43	55.23	0.00763501	0.0258363	1.1	-0.01	-0.115645	4.53856	-2.43	0.0258363	-0.01	0.01741	0.440123	0.0997775	0.515459	0.420344	0.450315	0.371474	4	0.371474	0.999899	1	-0.115645	0.457513	0.0447544
2021-01-24	EGX30	11578.8	11654.6	11672.1	11478.6	829900000	-0.0065	-0.00651994	0.0213992	0.11564	7.8563e-06	0.196758	0.0505414	0.678996	0.643698	0.488701	0.465484	4	93.5556	-0.115645	0	29.344	11.18	55.178	0.000543134	0.00995579	1.11	0.01	-0.115645	4.53856	11.18	0.00995579	0.01	-0.00651994	0.465484	0.0370683	0.565092	0.539631	0.472565	0.403589	4	0.403589	0.999779	1	-0.115645	0.371474	0.01741
2021-01-31	EGX30	11598.9	11578.8	11673.5	11546.1	810710000	0.0017	0.00172666	0.0225735	0.11564	2.12981e-06	0.199273	0.00254016	0.692095	0.654927	0.498644	0.462052	4	93.5556	-0.115645	0	24.27	-12.22	58.222	0.0737718	0.0358209	1.19	0.08	-0.115645	4.53856	-12.22	0.0358209	0.08	0.00172666	0.462052	0	0.575259	0.553652	0.482163	0.402769	4	0.402769	0.998954	1	-0.115645	0.403589	-0.00651994
2021-02-07	EGX30	11546.3	11598.9	11665	11429.3	1230000000	-0.0045	-0.00453918	0.0108458	0.11564	3.69039e-06	0.204507	0.0156214	0.561268	0.409589	0.519332	0.376453	4	79.3216	-0.165045	0	21.216	-0.9	61.128	0.0490463	0.0277921	1.2	0.01	-0.165045	4.37351	-0.9	0.0277921	0.01	-0.00453918	0.376453	0.0100623	0.473721	0.247313	0.502134	0.308308	4	0.308308	0.993257	1	-0.165045	0.402769	0.00172666
2021-02-14	EGX30	11380.5	11546.3	11592.4	11378	1380000000	-0.0144	-0.014461	0.00667542	0.11564	1.0479e-05	0.239577	0.0725257	0.514747	0.32182	0.657959	0.391763	4	79.3216	-0.165045	0	21.875	2.08	63.898	0.00590537	0.034805	1.34	0.14	-0.165045	4.37351	2.08	0.034805	0.14	-0.014461	0.391763	0.0540703	0.445536	0.137721	0.635953	0.31832	4	0.31832	0.990722	1	-0.165045	0.308308	-0.00453918
2021-02-21	EGX30	11617.9	11380.5	11621.6	11288.3	1280000000	0.0209	0.0206421	0.014787	0.11564	1.61267e-05	0.246199	0.119866	0.605234	0.380333	0.684135	0.447392	4	79.3216	-0.165045	0	24.948	5.9	65.858	0.0469395	0.0417155	1.44	0.1	-0.165045	4.37351	5.9	0.0417155	0.1	0.0206421	0.447392	0.090682	0.507844	0.210782	0.661222	0.367632	4	0.367632	0.990828	1	-0.165045	0.31832	-0.014461
2021-02-28	EGX30	11333.9	11617.9	11630.8	11298.1	1260000000	-0.0244	-0.0247532	0.0194509	0.115276	1.96454e-05	0.242732	0.149361	0.655294	0.392035	0.670431	0.46678	4	79.3216	-0.165045	0	25.47	-3.29	65.94	0.0602494	0.0669954	1.56	0.12	-0.165045	4.37351	-3.29	0.0669954	0.12	-0.0247532	0.46678	0.113493	0.546219	0.225394	0.647993	0.383275	4	0.383275	0.993598	1	-0.165045	0.367632	0.0206421
2021-03-07	EGX30	11261.4	11333.9	11609.8	11187.6	1180000000	-0.0064	-0.0064182	0.0194337	0.113959	5.43915e-06	0.253461	0.0302801	0.648	0.438845	0.712841	0.457492	4	98.8219	0.219808	0	22.932	-3.97	68.154	-0.01556	0.0425073	1.64	0.08	0.219808	4.59332	-3.97	0.0425073	0.08	-0.0064182	0.457492	0.0213988	0.538833	0.283843	0.688933	0.383252	4	0.383252	0.999599	1	0.219808	0.383275	-0.0247532
2021-03-14	EGX30	10918.4	11261.4	11344.6	10904	846280000	-0.0305	-0.0309271	0.0231433	0.0970203	3.65447e-05	0.280373	0.291017	0.598021	0.634114	0.819219	0.585593	4	98.8219	0.219808	0	20.316	0.26	66.114	-0.0733376	0.0925289	1.74	0.1	0.219808	4.59332	0.26	0.0925289	0.1	-0.0309271	0.585593	0.223045	0.477858	0.527664	0.791622	0.505047	4	0.505047	0.999951	1	0.219808	0.383252	-0.0064182
2021-03-21	EGX30	10870.5	10918.4	10974.9	10317	733950000	-0.0044	-0.00440042	0.0132191	0.0464691	5.99553e-06	0.271734	0.0349438	0.214659	0.699841	0.78507	0.433629	4	98.8219	0.219808	0	19.81	-2.09	62.506	-0.00360022	0.104705	1.67	-0.07	0.219808	4.59332	-2.09	0.104705	-0.07	-0.00440042	0.433629	0.0250056	0.11411	0.609734	0.758656	0.376876	4	0.376876	0.999972	1	0.219808	0.505047	-0.0309271
2021-03-28	EGX30	10564.9	10870.5	10935.5	10543.8	825960000	-0.0281	-0.0285137	0.0140946	0.0464691	3.45219e-05	0.268343	0.274061	0.224426	0.646004	0.771667	0.47904	4	98.8219	0.219808	0	19.27	-1.53	63.6775	0.00125372	0.0145551	1.72	0.05	0.219808	4.59332	-1.53	0.0145551	0.05	-0.0285137	0.47904	0.209932	0.12169	0.54251	0.745719	0.404963	4	0.404963	0.999974	1	0.219808	0.376876	-0.00440042
2021-04-04	EGX30	10303.5	10564.9	10586.6	10149.2	582090000	-0.0247	-0.0250468	0.0121237	0.0428504	4.30291e-05	0.25542	0.345371	0.182922	0.788699	0.720583	0.509394	4	116.918	0.168156	0	17.366	-0.64	61.8275	-0.031178	0.0388229	1.67	-0.05	0.168156	4.76147	-0.64	0.0388229	-0.05	-0.0250468	0.509394	0.26508	0.0847375	0.720685	0.696406	0.441727	4	0.441727	0.999999	1	0.168156	0.404963	-0.0285137
2021-04-11	EGX30	10143.2	10303.5	10503.1	10114.7	1070000000	-0.0156	-0.015684	0.0107986	0.0428504	1.46579e-05	0.250008	0.107555	0.16814	0.503209	0.69919	0.369524	4	116.918	0.168156	0	16.674	-0.44	64.686	0.0639931	0.0520445	1.59	-0.08	0.168156	4.76147	-0.44	0.0520445	-0.08	-0.015684	0.369524	0.0811607	0.0732652	0.364211	0.675755	0.298598	4	0.298598	0.999999	1	0.168156	0.441727	-0.0250468
2021-04-18	EGX30	10600.1	10143.2	10711.4	10143.2	537640000	0.045	0.0440561	0.0340034	0.0428504	8.19435e-05	0.206584	0.671564	0.426996	0.814708	0.527544	0.610203	4	116.918	0.168156	0	17.902	1.08	65.344	-0.00349199	0.0345236	1.58	-0.01	0.168156	4.76147	1.08	0.0345236	-0.01	0.0440561	0.610203	0.517348	0.27417	0.753161	0.51006	0.513685	4	0.513685	0.999999	1	0.168156	0.298598	-0.015684
2021-04-25	EGX30	10475.3	10600.1	10621.5	10475.3	393460000	-0.0118	-0.0118443	0.0312858	0.0428504	3.0103e-05	0.208777	0.23702	0.396682	0.899071	0.536211	0.517246	4	116.918	0.168156	0	17.74	1.28	66.964	0.0296695	0.0257681	1.65	0.07	0.168156	4.76147	1.28	0.0257681	0.07	-0.0118443	0.517246	0.181285	0.250642	0.858501	0.518427	0.452214	4	0.452214	0.999999	1	0.168156	0.513685	0.0440561
2021-05-02	EGX30	10588.1	10475.3	10588.9	10418.4	281620000	0.0108	0.0107135	0.0274255	0.0428504	3.80424e-05	0.20177	0.303571	0.353618	0.964512	0.508514	0.532554	4	118.654	0.0147331	0	18.404	-1.92	68.9925	0.0146566	0.0261245	1.6	-0.05	0.0147331	4.77621	-1.92	0.0261245	-0.05	0.0107135	0.532554	0.232754	0.217219	0.940212	0.491691	0.470469	4	0.470469	0.999999	1	0.0147331	0.452214	-0.0118443
2021-05-09	EGX30	10767.8	10588.1	10771.6	10588.1	225090000	0.017	0.0168341	0.0229971	0.0410244	7.47884e-05	0.0979192	0.611588	0.294369	0.997589	0.0980065	0.500388	4	118.654	0.0147331	0	22.206	2.12	68.732	0.00739295	0.0446131	1.63	0.03	0.0147331	4.77621	2.12	0.0446131	0.03	0.0168341	0.500388	0.470965	0.168843	0.981514	0.0954183	0.429185	4	0.429185	0.999999	1	0.0147331	0.470469	0.0107135
2021-05-16	EGX30	10732	10767.8	10863	10669.2	577140000	-0.0033	-0.00333771	0.0130559	0.0410244	5.78319e-06	0.109432	0.0331639	0.183472	0.791595	0.143514	0.287936	4	118.654	0.0147331	0	20.812	1.34	67.482	-0.037074	0.0479433	1.63	0	0.0147331	4.77621	1.34	0.0479433	0	-0.00333771	0.287936	0.0236291	0.0827729	0.724301	0.139348	0.242513	4	0.242513	0.999999	1	0.0147331	0.429185	0.0168341
2021-05-23	EGX30	10242.3	10732	10835.2	10242.3	1190000000	-0.0456	-0.0467	0.0286574	0.046282	3.92437e-05	0.124416	0.313641	0.38587	0.432994	0.202745	0.333813	4	118.654	0.0147331	0	17.62	-3.39	69.022	0.0388056	0.0288139	1.58	-0.05	0.0147331	4.77621	-3.39	0.0288139	-0.05	-0.0467	0.333813	0.240541	0.246746	0.276537	0.196525	0.240087	4	0.240087	0.999999	1	0.0147331	0.242513	-0.00333771
2021-05-30	EGX30	10054.8	10242.3	10380.5	10029.1	1370000000	-0.0183	-0.0184751	0.0267649	0.046282	1.34855e-05	0.113251	0.0977268	0.364758	0.327671	0.15861	0.237191	4	118.654	0.0147331	0	17.46	-0.34	70.66	0.027586	0.0151526	1.56	-0.02	0.0147331	4.77621	-0.34	0.0151526	-0.02	-0.0184751	0.237191	0.0735601	0.23036	0.145027	0.15392	0.150717	4	0.150717	0.999999	1	0.0147331	0.240087	-0.0467
2021-06-06	EGX30	9977.9	10054.8	10143.6	9959.32	713710000	-0.0076	-0.00767848	0.0195025	0.046282	1.07585e-05	0.11989	0.0748689	0.283744	0.711684	0.184855	0.313788	4	103.669	-0.135007	0	16.626	-0.77	71.458	0.010464	0.0117274	1.47	-0.09	-0.135007	4.6412	-0.77	0.0117274	-0.09	-0.00767848	0.313788	0.0558825	0.167483	0.624521	0.179256	0.256786	4	0.256786	0.999989	1	-0.135007	0.150717	-0.0184751
2021-06-13	EGX30	9865.59	9977.9	10015.6	9837.61	493050000	-0.0113	-0.0113197	0.0176827	0.046282	2.29585e-05	0.1473	0.177133	0.263443	0.840799	0.293203	0.393644	4	103.669	-0.135007	0	18.002	5.05	73.11	0.014468	0.0215611	1.45	-0.02	-0.135007	4.6412	5.05	0.0215611	-0.02	-0.0113197	0.393644	0.13497	0.151727	0.785739	0.283846	0.33907	4	0.33907	0.999989	1	-0.135007	0.256786	-0.00767848
2021-06-20	EGX30	10278.9	9865.59	10311.9	9769.18	837800000	0.0419	0.0410364	0.0271369	0.046282	4.89812e-05	0.0891003	0.395263	0.368908	0.639076	0.0631465	0.366598	4	103.669	-0.135007	0	16.492	-5.08	75.406	0.0448086	0.0232433	1.54	0.09	-0.135007	4.6412	-5.08	0.0232433	0.09	0.0410364	0.366598	0.303666	0.233581	0.53386	0.0617671	0.283218	4	0.283218	0.999989	1	-0.135007	0.33907	-0.0113197
2021-06-27	EGX30	10256.6	10278.9	10326	10094.2	543860000	-0.0022	-0.00216601	0.0243382	0.046282	3.98266e-06	0.0672966	0.0180713	0.337688	0.811068	0	0.291707	4	103.669	-0.135007	0	15.632	-0.55	76.26	0.01377	0.0330904	1.44	-0.1	-0.135007	4.6412	-0.55	0.0330904	-0.1	-0.00216601	0.291707	0.0119569	0.20935	0.748616	0	0.242481	4	0.242481	0.999985	1	-0.135007	0.283218	0.0410364
2021-07-04	EGX30	10184.8	10256.6	10387	10147.5	835370000	-0.007	-0.00702694	0.0242273	0.046282	8.41177e-06	0.112096	0.0551975	0.33645	0.640498	0.154044	0.296547	4	89.1933	-0.150395	0	16.955	1.11	76.134	-0.00478501	0.0493351	1.37	-0.07	-0.150395	4.49081	1.11	0.0493351	-0.07	-0.00702694	0.296547	0.0406692	0.20839	0.535635	0.149513	0.233552	4	0.233552	0.999817	1	-0.150395	0.242481	-0.00216601
2021-07-11	EGX30	10561.3	10184.8	10625.3	10152.6	483050000	0.037	0.0362981	0.0251316	0.0405175	7.51435e-05	0.12218	0.614564	0.315446	0.84665	0.193907	0.492642	4	89.1933	-0.150395	0	17.016	2.27	75.8	-0.0353599	0.0300103	1.31	-0.06	-0.150395	4.49081	2.27	0.0300103	-0.06	0.0362981	0.492642	0.473267	0.184537	0.793045	0.187993	0.40971	4	0.40971	0.999771	1	-0.150395	0.233552	-0.00702694
2021-07-18	EGX30	10646.9	10561.3	10648.7	10561.3	94060000	0.0081	0.00806959	0.0193858	0.0405175	8.57919e-05	0.125094	0.703823	0.251349	1	0.205423	0.540149	4	89.1933	-0.150395	0	19.006	-1.25	72.202	0.00535763	0.0839436	1.3	-0.01	-0.150395	4.49081	-1.25	0.0839436	-0.01	0.00806959	0.540149	0.542296	0.13479	1	0.19911	0.469049	4	0.469049	0.999772	1	-0.150395	0.40971	0.0362981
2021-07-25	EGX30	10742.2	10646.9	10837.2	10646.9	713090000	0.009	0.00891863	0.0180426	0.0405175	1.2507e-05	0.11313	0.0895252	0.236366	0.712047	0.158134	0.299018	4	89.1933	-0.150395	0	18.238	1.04	75.754	0.0374929	0.0246209	1.24	-0.06	-0.150395	4.49081	1.04	0.0246209	-0.06	0.00891863	0.299018	0.0672172	0.123161	0.624974	0.153461	0.242203	4	0.242203	0.999822	1	-0.150395	0.469049	0.00806959
2021-08-01	EGX30	10723.2	10742.2	10874.6	10688.4	435890000	-0.0018	-0.00177495	0.0163504	0.0405175	4.07201e-06	0.111677	0.0188203	0.217489	0.874244	0.152388	0.315735	4	127.474	0.357109	0	17.78	-2.09	72.26	-0.0901511	0.0639228	1.31	0.07	0.357109	4.84791	-2.09	0.0639228	0.07	-0.00177495	0.315735	0.0125362	0.10851	0.827501	0.147914	0.274115	4	0.274115	1	1	0.357109	0.242203	0.00891863
2021-08-08	EGX30	10884.5	10723.2	10887.7	10722.6	341820000	0.015	0.014932	0.00691836	0.0405175	4.36838e-05	0.114479	0.350859	0.112272	0.929287	0.163465	0.388971	4	127.474	0.357109	0	16.122	-0.7	71.094	-0.00169109	0.0336438	1.29	-0.02	0.357109	4.84791	-0.7	0.0336438	-0.02	0.014932	0.388971	0.269325	0.0326669	0.896229	0.158607	0.339207	4	0.339207	1	1	0.357109	0.274115	-0.00177495
2021-08-15	EGX30	10808.7	10884.5	11145.6	10808.7	424520000	-0.007	-0.00698839	0.00995972	0.0405175	1.64619e-05	0.103725	0.122676	0.146199	0.880897	0.120955	0.317682	4	127.474	0.357109	0	19.166	3.11	68.078	-0.0790676	0.0381717	1.26	-0.03	0.357109	4.84791	3.11	0.0381717	-0.03	-0.00698839	0.317682	0.0928551	0.0531804	0.835808	0.117571	0.274854	4	0.274854	1	1	0.357109	0.339207	0.014932
2021-08-22	EGX30	11125.5	10808.7	11160.4	10683.2	587070000	0.0293	0.0288929	0.0163547	0.0405175	4.92154e-05	0.0370575	0.397227	0.217536	0.785785	0	0.350137	4	127.474	0.357109	0	17.278	-2.17	71.016	0.0980679	0.0716022	1.31	0.05	0.357109	4.84791	-2.17	0.0716022	0.05	0.0288929	0.350137	0.305184	0.108547	0.717046	0	0.282694	4	0.282694	1	1	0.357109	0.274854	-0.00698839
2021-08-29	EGX30	11301.4	11125.5	11322	11043.7	600400000	0.0158	0.0156788	0.0148656	0.0405175	2.61139e-05	0.0536401	0.203583	0.200926	0.777985	0	0.295624	4	127.474	0.357109	0	16.32	0.02	73.0175	0.0111472	0.0343516	1.33	0.02	0.357109	4.84791	0.02	0.0343516	0.02	0.0156788	0.295624	0.155426	0.0956556	0.707307	0	0.239597	4	0.239597	1	1	0.357109	0.282694	0.0288929
2021-09-05	EGX30	11056.3	11301.4	11301.4	10955	373200000	-0.0217	-0.0219254	0.0227222	0.0405175	5.87497e-05	0.07805	0.477146	0.288568	0.910926	0.0194666	0.424027	4	128.782	0.0102032	0	18.9625	4.54	72.014	-0.00865925	0.0287396	1.35	0.02	0.0102032	4.85812	4.54	0.0287396	0.02	-0.0219254	0.424027	0.366991	0.163677	0.873303	0.019602	0.355893	4	0.355893	1	1	0.0102032	0.239597	0.0156788
2021-09-12	EGX30	10996.8	11056.3	11239.7	10996.8	407560000	-0.0054	-0.005397	0.0224803	0.0405175	1.32422e-05	0.0519228	0.095688	0.28587	0.890821	0	0.318095	4	128.782	0.0102032	0	19.302	-0.14	74.128	0.0299179	0.0264758	1.37	0.02	0.0102032	4.85812	-0.14	0.0264758	0.02	-0.005397	0.318095	0.0719833	0.161583	0.848199	0	0.270441	4	0.270441	1	1	0.0102032	0.355893	-0.0219254
2021-09-19	EGX30	10642	10996.8	11098.5	10453.2	331550000	-0.0323	-0.0327904	0.0211131	0.0411386	9.89002e-05	0.0581798	0.813701	0.273968	0.935297	0	0.505741	4	128.782	0.0102032	0	21.464	-3.06	75.32	0.0365686	0.0336486	1.47	0.1	0.0102032	4.85812	-3.06	0.0336486	0.1	-0.0327904	0.505741	0.627273	0.153159	0.903733	0	0.421041	4	0.421041	1	1	0.0102032	0.270441	-0.005397
2021-09-26	EGX30	10517	10642	10704.2	10281.2	274510000	-0.0117	-0.0118145	0.0119897	0.0411386	4.30384e-05	0.0812175	0.345449	0.172194	0.968672	0.0319871	0.379576	4	128.782	0.0102032	0	21.772	3.4	78.444	0.0252532	0.0287284	1.48	0.01	0.0102032	4.85812	3.4	0.0287284	0.01	-0.0118145	0.379576	0.265141	0.0741693	0.945407	0.0316883	0.329101	4	0.329101	0.999995	1	0.0102032	0.421041	-0.0327904
2021-10-03	EGX30	10536.4	10517	10575.7	10366.1	202770000	0.0018	0.00183913	0.0149152	0.0411386	9.07004e-06	0.0948633	0.0607153	0.204829	1	0.0859271	0.337868	4				20.714	-2.38	82.012	0.0342919	0.0358945	1.61	0.13			-2.38	0.0358945	0.13	0.00183913	0.337868	0.0449365	0.099498	0.997821	0.0837578	0.306503	4	0.306503				0.329101	-0.0118145
2021-10-10	EGX30	10995.6	10536.4	11018.2	10536.4	429190000	0.0436	0.0426593	0.0318223	0.0411386	9.93949e-05	0.102601	0.817847	0.393433	0.878165	0.116515	0.55149	4				18.33	-2.47	83.868	0.0299711	0.0218544	1.59	-0.02			-2.47	0.0218544	-0.02	0.0426593	0.55149	0.630479	0.245879	0.832396	0.113285	0.45551	4	0.45551				0.306503	0.00183913
2021-10-17	EGX30	11132.1	10995.6	11358.4	10995.6	390640000	0.0124	0.0123358	0.0231535	0.0411386	3.15786e-05	0.155725	0.249389	0.29673	0.900721	0.326503	0.443336	4				15.588	-0.87	84.984	0.00893598	0.0227755	1.66	0.07			-0.87	0.0227755	0.07	0.0123358	0.443336	0.190851	0.170825	0.860561	0.315991	0.384557	4	0.384557				0.45551	0.0426593
2021-10-24	EGX30	11506.6	11132.1	11506.6	11096.5	473060000	0.0336	0.0330933	0.0186975	0.0368058	6.99557e-05	0.110928	0.571079	0.223653	0.852495	0.149429	0.449164	4				16.198	0.83	84.116	-0.0276526	0.0167195	1.55	-0.11			0.83	0.0167195	-0.11	0.0330933	0.449164	0.439636	0.108433	0.800344	0.145057	0.373367	4	0.373367				0.384557	0.0123358
2021-10-31	EGX30	11612.8	11506.6	11729.6	11362.5	432330000	0.0092	0.00918799	0.0161854	0.0368058	2.12523e-05	0.115128	0.162831	0.195629	0.876328	0.16603	0.350204	4				15.892	0.22	82.522	-0.00809525	0.0530996	1.45	-0.1			0.22	0.0530996	-0.1	0.00918799	0.350204	0.123909	0.0866827	0.830102	0.161083	0.300444	4	0.300444				0.373367	0.0330933
2021-11-07	EGX30	11573.1	11612.8	11617.1	11372.7	366340000	-0.0034	-0.00342449	0.0151472	0.0368058	9.34784e-06	0.122984	0.0630439	0.184048	0.91494	0.197086	0.339779	4				17.536	-0.19	83.39	0.00568561	0.0277852	1.58	0.13			-0.19	0.0277852	0.13	-0.00342449	0.339779	0.0467374	0.0776943	0.878315	0.191062	0.298452	4	0.298452				0.300444	0.00918799
2021-11-14	EGX30	11338	11573.1	11664.3	11310.3	319840000	-0.0203	-0.0205279	0.0225737	0.0368058	6.41817e-05	0.114601	0.522678	0.266893	0.942148	0.163946	0.473916	4				17.094	1.62	81.63	-0.0326129	0.0467249	1.54	-0.04			1.62	0.0467249	-0.04	-0.0205279	0.473916	0.402205	0.141992	0.912288	0.159071	0.403889	4	0.403889				0.298452	-0.00342449
2021-11-21	EGX30	11431.2	11338	11451.6	11255.5	264490000	0.0082	0.00819092	0.0138303	0.0368058	3.09687e-05	0.166719	0.244277	0.169357	0.974535	0.369962	0.439533	4				21.4375	10.71	80.238	-0.10323	0.130061	1.48	-0.06			10.71	0.130061	-0.06	0.00819092	0.439533	0.186898	0.0662924	0.952728	0.357944	0.390965	4	0.390965				0.403889	-0.0205279
2021-11-28	EGX30	11318.4	11431.2	11442.3	11179.3	374170000	-0.0099	-0.00992466	0.0120245	0.0368058	2.65245e-05	0.10177	0.207024	0.149213	0.910359	0.113227	0.344956	4				27.978	2.05	71	-0.0232048	0.04405	1.35	-0.13			2.05	0.04405	-0.13	-0.00992466	0.344956	0.158087	0.0506583	0.872594	0.110112	0.297863	4	0.297863				0.390965	0.00819092
2021-12-05	EGX30	11534.6	11318.4	11631	11316.2	1120000000	0.0191	0.0189285	0.0177247	0.0368058	1.69005e-05	0.113733	0.126352	0.2128	0.473953	0.160514	0.243405	4				21.848	-11.98	74.788	0.0586344	0.0546287	1.48	0.13			-11.98	0.0546287	0.13	0.0189285	0.243405	0.0956982	0.10001	0.32768	0.155759	0.169787	4	0.169787				0.297863	-0.00992466
2021-12-12	EGX30	11667.7	11534.6	11765.6	11519.6	773970000	0.0115	0.0114731	0.0122481	0.0368058	1.48237e-05	0.106361	0.108944	0.151707	0.676425	0.131376	0.267113	4				20.726	2.88	73.762	-0.027173	0.0304487	1.41	-0.07			2.88	0.0304487	-0.07	0.0114731	0.267113	0.0822354	0.0525943	0.580495	0.127631	0.210739	4	0.210739				0.169787	0.0189285
2021-12-19	EGX30	11755.5	11667.7	11776.3	11440.2	602700000	0.0075	0.0074909	0.0122336	0.0368058	1.24289e-05	0.132767	0.0888704	0.151546	0.776639	0.235756	0.313203	4				20.1175	-3.61	73.91	0.0306346	0.0589763	1.5	0.09			-3.61	0.0589763	0.09	0.0074909	0.313203	0.0667108	0.0524686	0.705627	0.228392	0.263299	4	0.263299				0.210739	0.0114731
2021-12-26	EGX30	11949.2	11755.5	11950.3	11755.5	622930000	0.0165	0.0163448	0.00509135	0.0368058	2.62387e-05	0.155669	0.204628	0.0747953	0.764802	0.326282	0.342627	4				17.344	-0.74	78.16	0.0262345	0.0474485	1.52	0.02			-0.74	0.0474485	0.02	0.0163448	0.342627	0.156234	0.012268	0.690847	0.315778	0.293782	4	0.293782				0.263299	0.0074909
2022-01-02	EGX30	12043.4	11949.2	12069.2	11870.5	407780000	0.0079	0.0078558	0.00411568	0.0368058	1.92648e-05	0.126726	0.146171	0.0747953	0.890692	0.211876	0.330884	4				18.322	1.54	80.502	0.0632106	0.0301928	1.76	0.24			1.54	0.0301928	0.24	0.0078558	0.330884	0.111025	0.012268	0.848038	0.205339	0.294168	4	0.294168				0.293782	0.0163448
2022-01-09	EGX30	12012.3	12043.4	12065.1	11958.6	419530000	-0.0026	-0.0025865	0.00774371	0.0368058	6.16522e-06	0.161758	0.0363662	0.101459	0.883817	0.350353	0.342999	4				18.986	0.43	85.068	0.0577322	0.0459858	1.78	0.02			0.43	0.0459858	0.02	-0.0025865	0.342999	0.0261057	0.0135955	0.839453	0.339014	0.304542	4	0.304542				0.294168	0.0078558
2022-01-16	EGX30	11731.7	12012.3	12012.7	11665.9	336400000	-0.0234	-0.0236365	0.0172551	0.0368058	7.02632e-05	0.137397	0.573656	0.207562	0.932459	0.254058	0.491934	4				25.27	9.66	89.158	0.0291678	0.0164272	1.75	-0.03			9.66	0.0164272	-0.03	-0.0236365	0.491934	0.441629	0.0959448	0.900189	0.246058	0.420955	4	0.420955				0.304542	-0.0025865
2022-01-23	EGX30	11499.9	11731.7	11731.7	11496.7	224450000	-0.0198	-0.0199614	0.014813	0.0368058	8.89349e-05	0.154397	0.730168	0.18032	0.997964	0.321256	0.557427	4				30.234	-1.19	90.124	0.018983	0.037065	1.78	0.03			-1.19	0.037065	0.03	-0.0199614	0.557427	0.562671	0.074801	0.981982	0.310926	0.482595	4	0.482595				0.420955	-0.0236365
2022-01-30	EGX30	11638.1	11499.9	11720.7	11420.5	348150000	0.012	0.0119468	0.0164672	0.0368058	3.4315e-05	0.177272	0.272327	0.198773	0.925584	0.411674	0.452089	4				23.29	-4.44	92.774	0.0572556	0.0524053	1.93	0.15			-4.44	0.0524053	0.15	0.0119468	0.452089	0.20859	0.0891227	0.891605	0.398209	0.396882	4	0.396882				0.482595	-0.0199614
2022-02-06	EGX30	11578.5	11638.1	11708	11523.7	467640000	-0.0051	-0.00512738	0.0162069	0.0368058	1.09644e-05	0.166825	0.0765942	0.195869	0.855667	0.370382	0.374628	4				23.106	4.14	96.434	0.00658574	0.0258679	1.92	-0.01			4.14	0.0258679	-0.01	-0.00512738	0.374628	0.0572168	0.0868694	0.804304	0.358348	0.326685	4	0.326685				0.396882	0.0119468
2022-02-13	EGX30	11535	11578.5	11627.4	11320.2	403530000	-0.0038	-0.00376576	0.0130408	0.0368058	9.33204e-06	0.162811	0.0629115	0.16055	0.893179	0.354512	0.367788	4				26.836	0.39	97.798	-0.0136309	0.0590027	1.92	0			0.39	0.0590027	0	-0.00376576	0.367788	0.046635	0.0594572	0.851143	0.343029	0.325066	4	0.325066				0.326685	-0.00512738
2022-02-20	EGX30	10890.9	11535	11535.4	10842	395990000	-0.0558	-0.0574619	0.030249	0.0456508	0.000145109	0.288063	1	0.400219	0.897591	0.849618	0.786857	4				29.435	-0.16	99.364	0.0244441	0.0445796	1.97	0.05			-0.16	0.0445796	0.05	-0.0574619	0.786857	0.92683	0.257055	0.856652	0.820966	0.715376	4	0.715376				0.325066	-0.00376576
2022-02-27	EGX30	11305.5	10890.9	11305.5	10890.9	353730000	0.0381	0.037368	0.0388529	0.0456508	0.00010564	0.243827	0.870195	0.496199	0.922319	0.674758	0.740868	4				31.334	4.39	114.434	0.228486	0.13508	1.74	-0.23			4.39	0.13508	-0.23	0.037368	0.740868	0.670964	0.331548	0.887528	0.65217	0.635552	4	0.635552				0.715376	-0.0574619
2022-03-06	EGX30	10453.6	11305.5	11305.5	10332.2	380360000	-0.0754	-0.0783483	0.0524063	0.0608367	0.000205985	0.281163	1	0.704409	0.906737	0.822341	0.858372	4				33.002	-1.23	122.286	-0.0475355	0.147135	2	0.26			-1.23	0.147135	0.26	-0.0783483	0.858372	1	0.532353	0.868072	0.794636	0.798765	4	0.798765				0.635552	0.037368
2022-03-13	EGX30	10726.4	10453.6	10804.9	10284.8	442220000	0.0261	0.0257663	0.0582527	0.0608367	5.82657e-05	0.294115	0.473089	0.704409	0.870541	0.873538	0.730394	4				27.562	-6.88	109.592	-0.0326149	0.116934	2.14	0.14			-6.88	0.116934	0.14	0.0257663	0.730394	0.363854	0.582971	0.822876	0.844057	0.653439	4	0.653439				0.798765	-0.0783483
2022-03-20	EGX30	11709.2	10726.4	11977.2	10726.4	612160000	0.0916	0.0876597	0.0696918	0.0608367	0.000143197	0.234333	1	0.704409	0.771104	0.637231	0.778186	4				22.504	-3.06	123.598	0.0704963	0.0883231	2.48	0.34			-3.06	0.0883231	0.34	0.0876597	0.778186	0.914435	0.64434	0.698715	0.615945	0.718359	4	0.718359				0.653439	0.0257663
2022-03-27	EGX30	11238.5	11709.2	11709.2	11123.1	443760000	-0.0402	-0.0410278	0.0733962	0.0608367	9.2455e-05	0.158945	0.759675	0.704409	0.86964	0.339234	0.668239	4				19.61	-1.18	111.26	-0.144833	0.10606	2.39	-0.09			-1.18	0.10606	-0.09	-0.0410278	0.668239	0.585491	0.64434	0.821751	0.328281	0.594965	4	0.594965				0.718359	0.0876597
2022-04-03	EGX30	11101.9	11238.5	11563.2	11091.2	381900000	-0.0121	-0.0122237	0.0556045	0.0608367	3.20077e-05	0.158353	0.252986	0.704409	0.905835	0.336892	0.550031	4				20.882	1.53	103.33	-0.0469733	0.0630901	2.72	0.33			1.53	0.0630901	0.33	-0.0122237	0.550031	0.193633	0.560043	0.866946	0.32602	0.486661	4	0.486661				0.594965	-0.0410278
2022-04-10	EGX30	10679.5	11101.9	11101.9	10614.2	298190000	-0.038	-0.0387892	0.060599	0.0608367	0.000130082	0.173096	1	0.704409	0.954816	0.395171	0.763599	4				23.2875	1.54	105.415	0.090306	0.0846941	2.83	0.11			1.54	0.0846941	0.11	-0.0387892	0.763599	0.829413	0.603285	0.928106	0.382278	0.685771	4	0.685771				0.486661	-0.0122237
2022-04-17	EGX30	10548.1	10847.5	10848	10441.4	346800000	-0.0123	-0.0123812	0.0159647	0.0608367	3.57011e-05	0.176979	0.283946	0.322781	0.926373	0.410516	0.485904	4				22.95	5.51	105.722	-0.0526096	0.0569145	2.9	0.07			5.51	0.0569145	0.07	-0.0123812	0.485904	0.217576	0.216844	0.892591	0.397091	0.431026	4	0.431026				0.685771	-0.0387892
2022-04-24	EGX30	11047.7	10548.1	11055.9	10529.5	213840000	0.0474	0.0462727	0.0359407	0.0608367	0.000216389	0.128762	1	0.545619	1	0.219922	0.691385	4				31.106	5.19	103.92	0.0300711	0.0758523	2.89	-0.01			5.19	0.0758523	-0.01	0.0462727	0.691385	1	0.389794	0.989733	0.213106	0.648159	4	0.648159				0.431026	-0.0123812
2022-05-01	EGX30																					29.68	-3.21	110.36	0.0495106	0.0645236	3.12	0.23			-3.21	0.0645236	0.23								0					0.648159	0.0462727
2022-05-08	EGX30	10679	11047.7	11177.3	10602.1	398970000	-0.0334	-0.0339449	0.0390475	0.0608367	8.50814e-05	0.1746	0.697867	0.580277	0.895847	0.401112	0.643776	4				32.188	-1.32	107.432	-0.0153999	0.0973454	2.93	-0.19			-1.32	0.0973454	-0.19	-0.0339449	0.643776	0.53769	0.416694	0.854475	0.388013	0.549218	4	0.549218
2022-05-15	EGX30	10550	10679	10744	10345.6	272180000	-0.0121	-0.0121543	0.0344344	0.0608367	4.46554e-05	0.184916	0.359003	0.528817	0.970036	0.44189	0.574936	4				28.662	0.56	112.928	0.0133778	0.0485875	2.78	-0.15			0.56	0.0485875	-0.15	-0.0121543	0.574936	0.275623	0.376754	0.947109	0.427377	0.506716	4	0.506716				0.549218	-0.0339449
2022-05-22	EGX30	10200.6	10550	10571.7	10155.5	292800000	-0.0331	-0.0336804	0.0378367	0.0608367	0.000115029	0.177953	0.948894	0.56677	0.95797	0.414368	0.722001	4				27.904	-3.71	117.662	0.064412	0.0345407	2.74	-0.04			-3.71	0.0345407	-0.04	-0.0336804	0.722001	0.731827	0.40621	0.932044	0.40081	0.617723	4	0.617723				0.506716	-0.0121543
2022-05-29	EGX30	10007.5	10200.6	10260.1	9990.46	401060000	-0.0189	-0.0191068	0.0108749	0.058946	4.76408e-05	0.167198	0.384028	0.255805	0.894624	0.371856	0.476578	4				25.586	-0.93	124.105	0.0363794	0.0463116	2.96	0.22			-0.93	0.0463116	0.22	-0.0191068	0.476578	0.294976	0.162386	0.852948	0.359772	0.417521	4	0.417521				0.617723	-0.0336804
2022-06-05	EGX30	10235.4	10007.5	10266.7	9957.2	310240000	0.0228	0.0225194	0.0238354	0.058946	7.25871e-05	0.113392	0.593136	0.400384	0.947766	0.159168	0.525113	4				25.378	2.96	127.398	0.0139067	0.0260826	3.15	0.19			2.96	0.0260826	0.19	0.0225194	0.525113	0.456694	0.274597	0.919302	0.154459	0.451263	4	0.451263				0.417521	-0.0191068
2022-06-12	EGX30	9866.75	10235.4	10235.7	9866.75	433870000	-0.036	-0.0366847	0.0272744	0.058946	8.45523e-05	0.124828	0.693432	0.438746	0.875426	0.204374	0.552995	4				32.082	3.38	125.084	-0.0666751	0.0579992	3.25	0.1			3.38	0.0579992	0.1	-0.0366847	0.552995	0.53426	0.304371	0.828976	0.198098	0.466426	4	0.466426				0.451263	0.0225194
2022-06-19	EGX30	9439.85	9866.75	9866.75	9439.85	270140000	-0.0433	-0.0442304	0.0298476	0.0600135	0.000163732	0.0983165	1	0.473209	0.971229	0.0995768	0.636004	4				29.29	-3.9	116.832	-0.0157244	0.0374989	3.13	-0.12			-3.9	0.0374989	-0.12	-0.0442304	0.636004	1	0.332517	0.9486	0.0969341	0.594513	4	0.594513				0.466426	-0.0366847
2022-06-26	EGX30	9225.61	9439.85	9512.56	9008.2	318320000	-0.0227	-0.0229568	0.029898	0.0600135	7.21186e-05	0.0828893	0.589208	0.473772	0.943038	0.0385953	0.511153	4				27.776	-0.53	120.338	0.0156405	0.0324026	2.88	-0.25			-0.53	0.0324026	-0.25	-0.0229568	0.511153	0.453657	0.332954	0.913399	0.0380674	0.434519	4	0.434519				0.594513	-0.0442304
2022-07-03	EGX30	8764.25	9225.61	9226.42	8599.05	480110000	-0.05	-0.0513024	0.0121282	0.0623708	0.000106855	0.0667574	0.880384	0.288258	0.84837	0	0.504253	4				26.504	-2.06	113.636	-0.0451269	0.110538	3.09	0.21			-2.06	0.110538	0.21	-0.0513024	0.504253	0.678843	0.192059	0.795193	0	0.416524	4	0.416524				0.434519	-0.0229568
2022-07-10	EGX30																					26.182	-0.41	109.8	-0.0149421	0.0825893	2.93	-0.16			-0.41	0.0825893	-0.16								0					0.416524	-0.0513024
2022-07-17	EGX30	9289.81	8764.25	9289.81	8739.75	653150000	0.06	0.0582372	0.0503298	0.0623708	8.91635e-05	0.112112	0.732084	0.712684	0.74712	0.154107	0.586499	4				23.964	-1.2	113.534	-0.0501406	0.0781198	2.77	-0.16			-1.2	0.0781198	-0.16	0.0582372	0.586499	0.564153	0.522806	0.668767	0.149574	0.476325	4	0.476325
2022-07-24	EGX30	9369.32	9289.81	9441.07	9237.03	481650000	0.0086	0.00852242	0.0469364	0.0623708	1.76942e-05	0.122105	0.133006	0.676555	0.847469	0.193608	0.462659	4				22.99	-1.7	109.276	0.0434373	0.0314183	2.67	-0.1			-1.7	0.0314183	-0.1	0.00852242	0.462659	0.100844	0.493426	0.794068	0.187704	0.394011	4	0.394011				0.476325	0.0582372
2022-07-31	EGX30	10043.2	9369.32	10043.5	9369.32	624790000	0.0719	0.0694583	0.0551299	0.0623708	0.000111171	0.13251	0.916554	0.712684	0.763714	0.234738	0.656923	4				22.262	-0.18	102.544	-0.105849	0.0808938	2.83	0.16			-0.18	0.0808938	0.16	0.0694583	0.656923	0.706817	0.564365	0.689488	0.227409	0.547019	4	0.547019				0.394011	0.00852242
2022-08-07	EGX30	9988.84	10043.2	10175.5	9940.43	636060000	-0.0054	-0.00543031	0.0367051	0.0623708	8.53741e-06	0.129128	0.0562507	0.562421	0.75712	0.22137	0.39929	4				20.506	-1.62	104.644	0.0332367	0.0510805	2.84	0.01			-1.62	0.0510805	0.01	-0.00543031	0.39929	0.0414837	0.404844	0.681254	0.214504	0.335521	4	0.335521				0.547019	0.0694583
2022-08-14	EGX30	10094.2	9988.84	10153.1	9820.3	666810000	0.0105	0.0104886	0.0332301	0.0623708	1.57295e-05	0.129919	0.116537	0.523656	0.739127	0.224498	0.400954	4				19.94	1.07	96.726	-0.0724774	0.0652763	2.98	0.14			1.07	0.0652763	0.14	0.0104886	0.400954	0.0881072	0.374758	0.658787	0.217524	0.334794	4	0.334794				0.335521	-0.00543031
2022-08-21	EGX30	10287.3	10094.2	10372.6	10087.7	873960000	0.0191	0.0189502	0.0323473	0.0623708	2.16831e-05	0.0780454	0.166442	0.513809	0.617918	0.0194483	0.329404	4				23.614	4.96	98.872	0.0473821	0.0543363	3.04	0.06			4.96	0.0543363	0.06	0.0189502	0.329404	0.126702	0.367115	0.507441	0.0195843	0.255211	4	0.255211				0.334794	0.0104886
2022-08-28	EGX30	9936.87	10287.3	10301.2	9920.52	725910000	-0.0341	-0.0346551	0.0236026	0.0623708	4.77403e-05	0.118737	0.384861	0.416259	0.704546	0.180294	0.42149	4				25.864	-0.09	95.305	-0.0828401	0.0574463	3.2	0.16			-0.09	0.0574463	0.16	-0.0346551	0.42149	0.295621	0.291404	0.615608	0.174853	0.344371	4	0.344371				0.255211	0.0189502
2022-09-04	EGX30	10265.4	9936.87	10362.5	9905.05	730940000	0.0331	0.0325221	0.0291054	0.0623708	4.44935e-05	0.0935814	0.357646	0.477645	0.701603	0.0808598	0.404438	4				24.788	-2.68	90.43	-0.0152625	0.0746838	3.33	0.13			-2.68	0.0746838	0.13	0.0325221	0.404438	0.274574	0.339047	0.611933	0.0788663	0.326105	4	0.326105				0.344371	-0.0346551
2022-09-11	EGX30	10079	10265.4	10464.5	10039.4	543550000	-0.0182	-0.0183181	0.0313728	0.0623708	3.37009e-05	0.0743822	0.267179	0.502938	0.81125	0.00496816	0.396584	4				25.974	3.51	91.406	-0.0248481	0.0468302	3.45	0.12			3.51	0.0468302	0.12	-0.0183181	0.396584	0.204609	0.358678	0.748843	0.00560629	0.329434	4	0.329434				0.326105	0.0325221
2022-09-18	EGX30	9933.05	10079	10093.4	9627.85	429260000	-0.0145	-0.0145885	0.0288681	0.0623708	3.39851e-05	0.132694	0.269562	0.474997	0.878124	0.235464	0.464537	4				27.636	3.62	88.5425	-0.059193	0.07032	3.69	0.24			3.62	0.07032	0.24	-0.0145885	0.464537	0.206452	0.336992	0.832345	0.22811	0.400974	4	0.400974				0.329434	-0.0183181
2022-09-25	EGX30	9827.46	9933.05	9933.05	9696.15	378950000	-0.0106	-0.0106871	0.023732	0.0623708	2.82018e-05	0.16137	0.221084	0.417703	0.907562	0.348818	0.473792	4				31.7	1.7	87.276	0.0532489	0.0615037	3.83	0.14			1.7	0.0615037	0.14	-0.0106871	0.473792	0.168961	0.292525	0.869102	0.337532	0.41703	4	0.41703				0.400974	-0.0145885
2022-10-02	EGX30	10010.8	9827.46	10010.8	9653.33	314850000	0.0187	0.018482	0.0167981	0.0623708	5.8701e-05	0.198813	0.476738	0.340352	0.945068	0.496824	0.564746	4				29.92	-0.26	94.66	0.106395	0.0531676	3.89	0.06			-0.26	0.0531676	0.06	0.018482	0.564746	0.366676	0.232491	0.915934	0.480406	0.498877	4	0.498877				0.41703	-0.0106871
2022-10-09	EGX30	9853.74	10010.8	10010.8	9746.95	395490000	-0.0157	-0.0158114	0.0162365	0.0623708	3.99794e-05	0.19165	0.319807	0.334088	0.897884	0.468508	0.505072	4				32.722	0.66	94.624	-0.06973	0.0488728	4	0.11			0.66	0.0488728	0.11	-0.0158114	0.505072	0.24531	0.227629	0.857017	0.453072	0.445757	4	0.445757				0.498877	0.018482
2022-10-16	EGX30	10273.5	9853.74	10277.1	9853.6	369170000	0.0426	0.0417196	0.0268474	0.0623708	0.000113009	0.211591	0.931966	0.452456	0.913284	0.547334	0.71126	4				30.46	-2.33	91.036	-0.00434689	0.0303226	4.21	0.21			-2.33	0.0303226	0.21	0.0417196	0.71126	0.718736	0.319497	0.876247	0.529164	0.610911	4	0.610911				0.445757	-0.0158114
2022-10-23	EGX30	11072	10273.5	11072	10257.5	546300000	0.0777	0.0748505	0.0382105	0.0623708	0.000137014	0.21537	1	0.579214	0.809641	0.562272	0.737782	4				27.746	-3.94	93.014	0.0302501	0.0193066	4.02	-0.19			-3.94	0.0193066	-0.19	0.0748505	0.737782	0.874347	0.417878	0.746834	0.543585	0.645661	4	0.645661				0.610911	0.0417196
2022-10-30	EGX30	11262.4	11072	11440.4	11072	585590000	0.0172	0.0170485	0.0383586	0.0623708	2.91134e-05	0.215382	0.228725	0.580867	0.786651	0.562318	0.53964	4				25.48	-1.2	95.862	0.0503789	0.051352	4.17	0.15			-1.2	0.051352	0.15	0.0170485	0.53964	0.174871	0.41916	0.718128	0.543629	0.463947	4	0.463947				0.645661	0.0748505
2022-11-06	EGX30	11756.6	11262.4	11816.8	11178.7	410460000	0.0439	0.0429416	0.0236951	0.0623708	0.000104618	0.172343	0.861632	0.417291	0.889124	0.392194	0.64006	4				24.406	-2.03	96.078	-0.0322642	0.0567062	3.82	-0.35			-2.03	0.0567062	-0.35	0.0429416	0.64006	0.664341	0.292205	0.84608	0.379404	0.545508	4	0.545508				0.463947	0.0170485
2022-11-13	EGX30	12515.7	11756.6	12515.7	11754.9	787640000	0.0646	0.0625733	0.0252295	0.0623708	7.9444e-05	0.186915	0.650612	0.434407	0.668426	0.449792	0.550809	4				23.886	0.6	92.086	-0.0803454	0.045585	3.82	0			0.6	0.045585	0	0.0625733	0.550809	0.501145	0.305489	0.570507	0.435005	0.453037	4	0.453037				0.545508	0.0429416
2022-11-20	EGX30	12779.4	12515.7	12793.9	12413.3	624540000	0.0211	0.020853	0.0211568	0.0623708	3.33893e-05	0.183704	0.264567	0.388975	0.76386	0.437099	0.463625	4				20.984	-2.62	86.396	-0.0642012	0.0414016	3.68	-0.14			-2.62	0.0414016	-0.14	0.020853	0.463625	0.20259	0.270228	0.68967	0.422752	0.39631	4	0.39631				0.453037	0.0625733
2022-11-27	EGX30	13639.7	12779.4	13639.7	12779.4	882630000	0.0673	0.0651492	0.0205667	0.0623708	7.38126e-05	0.229835	0.603408	0.382392	0.612845	0.61945	0.554524	4				20.716	-1.44	85.03	0.0369584	0.0297363	3.51	-0.17			-1.44	0.0297363	-0.17	0.0651492	0.554524	0.464639	0.265119	0.501106	0.59878	0.457411	4	0.457411				0.39631	0.020853
2022-12-04	EGX30	14838.3	13639.7	14914.1	13639.7	1330000000	0.0879	0.0842255	0.0267055	0.0623708	6.33274e-05	0.271265	0.515518	0.450872	0.351076	0.783217	0.525171	4				22.144	3.77	78.556	-0.125017	0.068429	3.57	0.06			3.77	0.068429	0.06	0.0842255	0.525171	0.396667	0.318268	0.174251	0.756868	0.411514	4	0.411514				0.457411	0.0651492
2022-12-11	EGX30	15141.5	14838.3	15595.7	14275	1490000000	0.0204	0.0202303	0.0322175	0.0623708	1.35774e-05	0.211642	0.0984972	0.512361	0.257456	0.547535	0.353962	4				22.828	-0.21	80.802	0.0489336	0.0594853	3.48	-0.09			-0.21	0.0594853	-0.09	0.0202303	0.353962	0.0741558	0.365991	0.0573532	0.529359	0.256715	4	0.256715				0.411514	0.0842255
2022-12-18	EGX30	14482.9	15141.5	15180.4	14301.8	1070000000	-0.0435	-0.0444719	0.0571862	0.0623708	4.15625e-05	0.214992	0.333078	0.712684	0.503209	0.560779	0.527437	4				21.362	-1.75	80.678	0.0276685	0.0500412	3.75	0.27			-1.75	0.0500412	0.27	-0.0444719	0.527437	0.255573	0.582169	0.364211	0.542143	0.436024	4	0.436024				0.256715	0.0202303
2022-12-25	EGX30	14598.5	14482.9	14690.9	14202.7	756720000	0.008	0.00795012	0.0528848	0.0623708	1.0506e-05	0.20441	0.0727523	0.712684	0.686518	0.518948	0.497725	4				21.725	0.8	81.8267	0.00447753	0.0261196	3.88	0.13			0.8	0.0261196	0.13	0.00795012	0.497725	0.0542455	0.544927	0.593098	0.501763	0.423508	4	0.423508				0.436024	-0.0444719
2023-01-01	EGX30	16002.2	14598.5	16028.8	14598.1	1030000000	0.0962	0.0918041	0.0561328	0.0623708	8.91302e-05	0.187354	0.731805	0.712684	0.526615	0.451527	0.605658	4				22.125	-0.54	77.2025	-0.080556	0.0740816	3.55	-0.33			-0.54	0.0740816	-0.33	0.0918041	0.605658	0.563937	0.573048	0.393436	0.43668	0.491775	4	0.491775				0.423508	0.00795012
2023-01-08	EGX30	15551.5	16002.2	16274.9	15301.9	1130000000	-0.0282	-0.0285698	0.0608462	0.0623708	2.5283e-05	0.217548	0.196618	0.712684	0.468102	0.570881	0.487071	4				20.164	-2.78	80.606	0.0878944	0.0437962	3.49	-0.06			-2.78	0.0437962	-0.06	-0.0285698	0.487071	0.150039	0.613857	0.320374	0.551895	0.409041	4	0.409041				0.491775	0.0918041
2023-01-15	EGX30	16066	15551.5	16118.9	15498.9	1130000000	0.0331	0.0325488	0.0505856	0.0623708	2.88043e-05	0.212281	0.226134	0.712684	0.468102	0.55006	0.489245	4				19.912	1.5	84.57	0.0414403	0.03582	3.48	-0.01			1.5	0.03582	-0.01	0.0325488	0.489245	0.172866	0.525021	0.320374	0.531796	0.387514	4	0.387514				0.409041	-0.0285698
2023-01-22	EGX30	16791.1	16066	16840.1	16066	898500000	0.0451	0.0441456	0.0495226	0.0623708	4.91325e-05	0.227008	0.396532	0.705405	0.603559	0.608275	0.578443	4				19.066	-1.34	85.904	-0.0185706	0.0326753	3.52	0.04			-1.34	0.0326753	0.04	0.0441456	0.578443	0.304647	0.515818	0.489511	0.587992	0.474492	4	0.474492				0.387514	0.0325488
2023-01-29	EGX30	16255.7	16791.1	17764	16198.9	945420000	-0.0319	-0.0324041	0.040053	0.0623708	3.42748e-05	0.283449	0.27199	0.599769	0.576105	0.831378	0.56981	4				18.854	-0.18	81.87	-0.0793303	0.0380764	3.53	0.01			-0.18	0.0380764	0.01	-0.0324041	0.56981	0.20833	0.433831	0.455231	0.803359	0.475188	4	0.475188				0.474492	0.0441456
2023-02-05	EGX30	17613.8	16255.7	17613.8	15748.5	830040000	0.0835	0.0802361	0.0469731	0.0623708	9.66653e-05	0.237497	0.794967	0.676964	0.643617	0.649735	0.691321	4				19.792	2.2	83.298	0.0805011	0.0465527	3.74	0.21			2.2	0.0465527	0.21	0.0802361	0.691321	0.612785	0.493744	0.539529	0.628014	0.568518	4	0.568518				0.475188	-0.0324041
2023-02-12	EGX30	17488.9	17613.8	17724.8	17113.2	955160000	-0.0071	-0.00711687	0.0506195	0.0623708	7.45097e-06	0.230442	0.0471438	0.712684	0.570405	0.62185	0.488021	4				19.534	-0.51	84.172	-0.0416951	0.0282751	3.82	0.08			-0.51	0.0282751	0.08	-0.00711687	0.488021	0.0344407	0.525314	0.448115	0.601096	0.402242	4	0.402242				0.568518	0.0802361
2023-02-19	EGX30	17003.9	17488.9	17621	16672.9	622990000	-0.0277	-0.0281219	0.0525665	0.0623708	4.51403e-05	0.255235	0.363068	0.712684	0.764767	0.719854	0.640093	4				21.84	1.65	81.774	0.00413928	0.0466454	3.95	0.13			1.65	0.0466454	0.13	-0.0281219	0.640093	0.278767	0.542171	0.690803	0.695702	0.551861	4	0.551861				0.402242	-0.00711687
2023-02-26	EGX30	16846.8	17003.9	17359.9	16846.8	711210000	-0.0092	-0.0092826	0.0484651	0.0623708	1.30518e-05	0.233127	0.094092	0.693608	0.713147	0.632463	0.533328	4				20.062	-3.18	83.604	0.0408269	0.0340406	3.97	0.02			-3.18	0.0340406	0.02	-0.0092826	0.533328	0.070749	0.506662	0.626348	0.611342	0.453775	4	0.453775				0.551861	-0.0281219
2023-03-05	EGX30	16454.3	16846.8	17057	16226.6	474310000	-0.0233	-0.0235727	0.0103944	0.0580409	4.96989e-05	0.233316	0.401279	0.245563	0.851764	0.633209	0.532954	4				20.944	6.31	82.858	-0.0409484	0.0410806	3.7	-0.27			6.31	0.0410806	-0.27	-0.0235727	0.532954	0.308318	0.153251	0.79943	0.612062	0.468265	4	0.468265				0.453775	-0.0092826
2023-03-12	EGX30	14704.2	16454.3	16468.4	14611.9	689980000	-0.1064	-0.112456	0.046759	0.0807021	0.000162984	0.21956	1	0.773448	0.725569	0.578835	0.769463	4				24.978	0.71	74.978	-0.147269	0.067797	3.39	-0.31			0.71	0.067797	-0.31	-0.112456	0.769463	1	0.592637	0.641859	0.559573	0.698517	4	0.698517				0.468265	-0.0235727
2023-03-19	EGX30	15625.1	14704.2	15625.1	14425.8	488840000	0.0626	0.0607455	0.0711578	0.06941	0.000124265	0.226549	1	0.75065	0.843262	0.606461	0.800093	4				22.428	-3.77	74.244	0.0359502	0.0483697	3.38	-0.01			-3.77	0.0483697	-0.01	0.0607455	0.800093	0.791701	0.691458	0.788815	0.586241	0.714553	4	0.714553				0.698517	-0.112456
2023-03-26	EGX30	16418.5	15625.1	16644.7	15625.1	714770000	0.0508	0.0495333	0.0799578	0.06941	6.92996e-05	0.242686	0.565579	0.75065	0.711064	0.670247	0.674385	4				19.482	-3.04	78.004	0.0727975	0.0482812	3.48	0.1			-3.04	0.0482812	0.1	0.0495333	0.674385	0.435382	0.691458	0.623747	0.647816	0.599601	4	0.599601				0.714553	0.0607455
2023-04-02	EGX30	16709.3	16418.5	17111.7	16416.1	791930000	0.0177	0.0175537	0.0796636	0.06941	2.21657e-05	0.245443	0.170487	0.75065	0.665916	0.681144	0.567049	4				18.7575	-0.3	85.99	0.0889878	0.0807013	3.39	-0.09			-0.3	0.0807013	-0.09	0.0175537	0.567049	0.129831	0.691458	0.567373	0.658334	0.511749	4	0.511749				0.599601	0.0495333
2023-04-09	EGX30	17671.3	16709.3	17671.3	16610.5	695580000	0.0576	0.0559759	0.0194818	0.06941	8.04737e-05	0.257899	0.659244	0.408256	0.722293	0.730381	0.630043	4				18.406	-1.33	87.3625	0.00862719	0.0266896	3.52	0.13			-1.33	0.0266896	0.13	0.0559759	0.630043	0.50782	0.294412	0.637767	0.705864	0.536466	4	0.536466				0.511749	0.0175537
2023-04-16	EGX30	17516	17671.3	17671.3	17175.2	315860000	-0.0088	-0.00882312	0.0300563	0.06941	2.79337e-05	0.23741	0.218836	0.526218	0.944477	0.649392	0.584731	4				16.836	-0.3	84.62	-0.0462964	0.0312278	3.57	0.05			-0.3	0.0312278	0.05	-0.00882312	0.584731	0.167222	0.385966	0.915196	0.627684	0.524017	4	0.524017				0.536466	0.0559759
2023-04-23	EGX30	17796.9	17516	17851.2	17361.5	396640000	0.016	0.0159078	0.0267561	0.06941	4.01064e-05	0.21944	0.320872	0.489404	0.897211	0.578361	0.571462	4				17.46	-0.99	81.396	-0.0247766	0.0493179	3.44	-0.13			-0.99	0.0493179	-0.13	0.0159078	0.571462	0.246134	0.357394	0.856177	0.559115	0.504705	4	0.504705				0.524017	-0.00882312
2023-04-30	EGX30	17295.3	17796.9	18142.6	17205.1	718740000	-0.0282	-0.0285918	0.0364448	0.06941	3.97804e-05	0.219078	0.31814	0.597484	0.708741	0.576929	0.550323	4				17.896	1.41	74.6175	-0.0696343	0.0863449	3.44	0			1.41	0.0863449	0	-0.0285918	0.550323	0.244021	0.441277	0.620846	0.557733	0.465969	4	0.465969				0.504705	0.0159078
2023-05-07	EGX30	17270.7	17295.3	17832.7	17109.6	930520000	-0.0014	-0.00142221	0.0184299	0.06941	1.5284e-06	0.210155	0	0.396522	0.584823	0.541657	0.38075	4				17.118	-0.16	76.08	-0.0174218	0.0352829	3.46	0.02			-0.16	0.0352829	0.02	-0.00142221	0.38075	0	0.285305	0.466117	0.523684	0.318777	4	0.318777				0.465969	-0.0285918
2023-05-14	EGX30	16745.5	17270.7	17523.5	16562.6	851930000	-0.0304	-0.0308789	0.0225105	0.06941	3.62458e-05	0.245668	0.288511	0.442042	0.630808	0.682037	0.51085	4				16.968	-0.22	75.752	0.0117366	0.0320123	3.7	0.24			-0.22	0.0320123	0.24	-0.0308789	0.51085	0.221107	0.320635	0.523536	0.659196	0.431118	4	0.431118				0.318777	-0.00142221
2023-05-21	EGX30	17043.6	16745.5	17240.7	16636.9	736510000	0.0178	0.017644	0.0232143	0.06941	2.39562e-05	0.247465	0.185496	0.449894	0.698344	0.689138	0.505718	4				18.572	1.14	76.482	0.0119936	0.0380967	3.8	0.1			1.14	0.0380967	0.1	0.017644	0.505718	0.141438	0.326729	0.607863	0.666051	0.43552	4	0.43552				0.431118	-0.0308789
2023-05-28	EGX30	17533.3	17043.6	17747.1	17043.6	1100000000	0.0287	0.0283266	0.0259648	0.06941	2.57514e-05	0.240724	0.200544	0.480577	0.485656	0.662493	0.457317	4				16.622	-3.35	73.885	-0.00433271	0.0584678	3.69	-0.11			-3.35	0.0584678	-0.11	0.0283266	0.457317	0.153076	0.350542	0.342293	0.64033	0.37156	4	0.37156				0.43552	0.017644
2023-06-04	EGX30	17521.4	17533.3	17706.6	17304.7	1580000000	-0.0007	-0.000681792	0.0259214	0.06941	4.31514e-07	0.287494	0	0.480093	0.204795	0.847368	0.383064	4				14.022	-0.77	76.06	-0.0167179	0.023414	3.75	0.06			-0.77	0.023414	0.06	-0.000681792	0.383064	0	0.350167	0	0.818795	0.29224	4	0.29224				0.37156	0.0283266
2023-06-11	EGX30	17881.5	17521.4	18056.5	17521.4	1230000000	0.0206	0.0203471	0.0122632	0.06941	1.65423e-05	0.276375	0.12335	0.32773	0.409589	0.803417	0.416022	4				14.308	-0.29	74.388	0.0266682	0.0635382	3.77	0.02			-0.29	0.0635382	0.02	0.0203471	0.416022	0.0933767	0.231914	0.247313	0.776367	0.337243	4	0.337243				0.29224	-0.000681792
2023-06-18	EGX30	17712.9	17881.5	18217.7	17580	750580000	-0.0094	-0.0094729	0.0176604	0.06941	1.26208e-05	0.278788	0.0904787	0.387938	0.690111	0.812954	0.49537	4				13.524	-0.1	75.258	-0.0425823	0.0436871	3.74	-0.03			-0.1	0.0436871	-0.03	-0.0094729	0.49537	0.0679546	0.278643	0.597584	0.785573	0.432439	4	0.432439				0.337243	0.0203471
2023-06-25	EGX30	17665.3	17712.9	17743.1	17287.6	271420000	-0.0027	-0.00269318	0.0128763	0.06941	9.92257e-06	0.279634	0.0678615	0.33457	0.97048	0.816296	0.547302	4				13.71	0.15	73.55	0.0128319	0.0377597	3.81	0.07			0.15	0.0377597	0.07	-0.00269318	0.547302	0.0504632	0.237223	0.947665	0.7888	0.506038	4	0.506038				0.432439	-0.0094729
2023-07-02	EGX30	17102.3	17665.3	17730	17078.7	314470000	-0.0319	-0.0323887	0.0217065	0.06941	0.000102995	0.215787	0.848022	0.433074	0.945291	0.56392	0.697577	4				14.344	1.24	76.596	0.0555989	0.0354209	4.06	0.25			1.24	0.0354209	0.25	-0.0323887	0.697577	0.653815	0.313674	0.916212	0.545175	0.607219	4	0.607219				0.506038	-0.00269318
2023-07-09	EGX30	17342.3	17102.3	17448.9	16555.1	718290000	0.014	0.0139351	0.0191991	0.0638609	1.94003e-05	0.273013	0.147307	0.375173	0.709005	0.790125	0.505402	4				14.08	-1.49	79.786	0.0142436	0.0341494	3.83	-0.23			-1.49	0.0341494	-0.23	0.0139351	0.505402	0.111904	0.261468	0.621175	0.763536	0.439521	4	0.439521				0.607219	-0.0323887
2023-07-16	EGX30	17578.7	17342.3	17671.1	17324.4	461650000	0.0136	0.0135382	0.0217507	0.0638609	2.93257e-05	0.284685	0.230505	0.403637	0.859172	0.836264	0.582394	4				13.626	0.26	79.48	0.0144138	0.0391545	3.84	0.01			0.26	0.0391545	0.01	0.0135382	0.582394	0.176247	0.28356	0.80868	0.808075	0.51914	4	0.51914				0.439521	0.0139351
2023-07-23	EGX30	17339.1	17578.7	17761.4	17305	324770000	-0.0136	-0.0137245	0.0225684	0.0638609	4.22591e-05	0.297947	0.338916	0.412759	0.939264	0.888685	0.644906	4				13.74	-0.27	83.548	0.0414436	0.0270125	3.96	0.12			-0.27	0.0270125	0.12	-0.0137245	0.644906	0.260089	0.290639	0.908686	0.858678	0.579523	4	0.579523				0.51914	0.0135382
2023-07-30	EGX30	17451.4	17339.1	17663.9	17334.5	1330000000	0.0065	0.00646041	0.0129803	0.0638609	4.85745e-06	0.329079	0.0254041	0.3058	0.351076	1	0.42057	4				15.334	3.77	85.628	0.0336332	0.034162	4.05	0.09			3.77	0.034162	0.09	0.00646041	0.42057	0.0176279	0.207626	0.174251	0.977473	0.344245	4	0.344245				0.579523	-0.0137245
2023-08-06	EGX30	17710.2	17451.4	17938.1	17451.4	1580000000	0.0148	0.0147186	0.0131636	0.0638609	9.31556e-06	0.329048	0.0627733	0.307846	0.204795	1	0.393853	4				15.682	-2.26	87.83	0.00627462	0.0333852	4.16	0.11			-2.26	0.0333852	0.11	0.0147186	0.393853	0.0465281	0.209213	0	0.977354	0.308274	4	0.308274				0.344245	0.00646041
2023-08-13	EGX30	17969.3	17710.2	18166.7	17710.2	1070000000	0.0146	0.0145223	0.0133777	0.0638609	1.35723e-05	0.2889	0.0984545	0.310233	0.503209	0.852925	0.441206	4				16.65	2.46	85.866	-0.0231244	0.0279938	4.26	0.1			2.46	0.0279938	0.1	0.0145223	0.441206	0.0741229	0.211066	0.364211	0.824159	0.36839	4	0.36839				0.308274	0.0147186
2023-08-20	EGX30	18207.8	17969.3	18322.1	17899.7	934240000	0.0133	0.0131881	0.00390101	0.0638609	1.41164e-05	0.291864	0.103015	0.22072	0.582646	0.86464	0.442755	4				16.592	-1.62	84.714	-0.00583637	0.0210824	4.25	-0.01			-1.62	0.0210824	-0.01	0.0131881	0.442755	0.0776502	0.16096	0.463399	0.835467	0.384369	4	0.384369				0.36839	0.0145223
2023-08-27	EGX30	18873.8	18207.8	18884.8	18207.8	909570000	0.0366	0.0359246	0.010912	0.0631106	3.94963e-05	0.303787	0.315758	0.278681	0.597081	0.91177	0.525822	4				14.014	-2.59	87.565	0.0520072	0.0333356	4.18	-0.07			-2.59	0.0333356	-0.07	0.0359246	0.525822	0.242178	0.185595	0.481423	0.880963	0.44754	4	0.44754				0.384369	0.0131881
2023-09-03	EGX30	19375.7	18873.8	19471.4	18726	744050000	0.0266	0.0262429	0.0107173	0.0631106	3.52703e-05	0.267179	0.280335	0.276509	0.693932	0.767065	0.50446	4				14.104	0.75	91.294	0.0205694	0.0156971	4.26	0.08			0.75	0.0156971	0.08	0.0262429	0.50446	0.214783	0.183909	0.602355	0.741276	0.435581	4	0.435581				0.44754	0.0359246
2023-09-10	EGX30	19540.3	19375.7	19676.2	19112	773260000	0.0085	0.00846186	0.0124961	0.0631106	1.09431e-05	0.129179	0.076416	0.296351	0.67684	0.221573	0.317795	4				13.624	-0.05	93.868	0.0394929	0.0296067	4.33	0.07			-0.05	0.0296067	0.07	0.00846186	0.317795	0.0570789	0.19931	0.581013	0.2147	0.263025	4	0.263025				0.435581	0.0262429
2023-09-17	EGX30	20080.6	19540.3	20264.2	19540.3	990540000	0.0276	0.0272721	0.0115248	0.0631106	2.75326e-05	0.100336	0.215474	0.285517	0.549704	0.107562	0.289564	4				15.598	3.41	94.862	-0.0164613	0.0194319	4.44	0.11			3.41	0.0194319	0.11	0.0272721	0.289564	0.164623	0.190901	0.422266	0.104642	0.220608	4	0.220608				0.263025	0.00846186
2023-09-24	EGX30	20174.3	20080.6	20531.3	20077.4	756280000	0.0047	0.00465584	0.0117723	0.0631106	6.15624e-06	0.0967541	0.036291	0.288277	0.686776	0.093401	0.276186	4				17.784	0.32	95.614	0.0197004	0.029511	4.59	0.15			0.32	0.029511	0.15	0.00465584	0.276186	0.0260475	0.193043	0.593419	0.0909726	0.225871	4	0.225871				0.220608	0.0272721
2023-10-01	EGX30	19873.3	20174.3	20223.8	19608.7	578750000	-0.0149	-0.0150309	0.0173417	0.0631106	2.59713e-05	0.101185	0.202387	0.350407	0.790653	0.110916	0.363591	4				18.382	-0.07	90.328	-0.0871442	0.0809311	4.78	0.19			-0.07	0.0809311	0.19	-0.0150309	0.363591	0.154501	0.241263	0.723125	0.10788	0.306692	4	0.306692				0.225871	0.00465584
2023-10-08	EGX30	20002.1	19873.3	20002.1	18455.7	734970000	0.0065	0.00645964	0.0172889	0.0631106	8.78899e-06	0.127169	0.0583595	0.349817	0.699245	0.213626	0.330262	4				17.366	1.87	90.476	0.0710546	0.0843587	4.63	-0.15			1.87	0.0843587	-0.15	0.00645964	0.330262	0.0431146	0.240806	0.608989	0.207028	0.274984	4	0.274984				0.306692	-0.0150309
2023-10-15	EGX30	21616.6	20002.1	22423.6	20002.1	1300000000	0.0807	0.0776243	0.0406473	0.0631106	5.9711e-05	0.0917348	0.485204	0.610388	0.36863	0.0735606	0.384446	4				19.484	2.39	92.468	-0.00648766	0.0424377	4.93	0.3			2.39	0.0424377	0.3	0.0776243	0.384446	0.373223	0.443041	0.19617	0.0718201	0.271064	4	0.271064				0.274984	0.00645964
2023-10-22	EGX30	23262.3	21616.6	23439.4	21586.3	1380000000	0.0761	0.0733712	0.0469232	0.0631106	5.31675e-05	0.129205	0.430355	0.680397	0.32182	0.221673	0.413561	4				20.296	-0.44	89.84	-0.0324236	0.0619519	4.84	-0.09			-0.44	0.0619519	-0.09	0.0733712	0.413561	0.330804	0.497377	0.137721	0.214796	0.295175	4	0.295175				0.271064	0.0776243
2023-10-29	EGX30	22639.6	23262.3	23573.8	22201.6	1830000000	-0.0268	-0.0271326	0.0514483	0.0631106	1.48266e-05	0.194592	0.108968	0.716673	0.0585127	0.480141	0.341074	4				17.066	-6.36	88.208	-0.035678	0.0528109	4.57	-0.27			-6.36	0.0528109	-0.27	-0.0271326	0.341074	0.0822539	0.536555	0	0.464302	0.270778	4	0.270778				0.295175	0.0733712
2023-11-05	EGX30	24312.9	22639.6	24543.1	22639.6	1580000000	0.0739	0.0713078	0.0506851	0.0631106	4.51315e-05	0.209193	0.362994	0.716673	0.204795	0.537854	0.455579	4				14.722	-0.74	83.52	-0.0454491	0.0565307	4.61	0.04			-0.74	0.0565307	0.04	0.0713078	0.455579	0.27871	0.529948	0	0.520013	0.332168	4	0.332168				0.270778	-0.0271326
2023-11-12	EGX30	24383.3	24312.9	24473.7	23694.7	1280000000	0.0029	0.00288935	0.0502874	0.0631106	2.2573e-06	0.233188	0.0036088	0.716673	0.380333	0.632704	0.43333	4				14.244	-0.37	81.928	-0.0295994	0.0763413	4.44	-0.17			-0.37	0.0763413	-0.17	0.00288935	0.43333	0.000772049	0.526504	0.210782	0.611574	0.337408	4	0.337408				0.332168	0.0713078
2023-11-19	EGX30	25519.5	24383.3	25563.4	24383.3	1290000000	0.0466	0.0455452	0.0438161	0.0631106	3.53064e-05	0.225757	0.280637	0.645736	0.374481	0.603329	0.476046	4				12.974	-1.34	81.62	-0.0173874	0.0326211	4.47	0.03			-1.34	0.0326211	0.03	0.0455452	0.476046	0.215017	0.470476	0.203476	0.583217	0.368047	4	0.368047				0.337408	0.00288935
2023-11-26	EGX30	24735.4	25519.5	25945.6	24416.9	1530000000	-0.0307	-0.0312075	0.0453939	0.0631106	2.0397e-05	0.211655	0.155662	0.663337	0.234051	0.547586	0.400159	4				12.782	0.17	80.914	-0.0138768	0.0513096	4.22	-0.25			0.17	0.0513096	-0.25	-0.0312075	0.400159	0.118365	0.484137	0.0281286	0.529408	0.29001	4	0.29001				0.368047	0.0455452
2023-12-03	EGX30	24686.2	24735.4	25446.1	24055.3	1500000000	-0.002	-0.00199225	0.0316363	0.0631106	1.32817e-06	0.213172	0	0.509867	0.251605	0.553583	0.328764	4				12.862	-0.28	75.982	-0.0359537	0.0471226	4.23	0.01			-0.28	0.0471226	0.01	-0.00199225	0.328764	0	0.365024	0.0500471	0.535197	0.237567	4	0.237567				0.29001	-0.0312075
2023-12-10	EGX30	24722.8	24686.2	25056.4	23941.2	1130000000	0.0015	0.00148394	0.0316577	0.0631106	1.31322e-06	0.265184	0	0.510106	0.468102	0.759177	0.434346	4				12.33	-0.07	75.578	0.0117818	0.0444429	3.91	-0.32			-0.07	0.0444429	-0.32	0.00148394	0.434346	0	0.36521	0.320374	0.733662	0.354811	4	0.354811				0.237567	-0.00199225
2023-12-17	EGX30	24305.1	24722.8	25532.2	24261.9	846580000	-0.0169	-0.0170409	0.0150129	0.0590828	2.01291e-05	0.286054	0.153416	0.302704	0.633939	0.841674	0.482933	4				13.088	0.75	80.154	0.0431722	0.0338108	3.9	-0.01			0.75	0.0338108	-0.01	-0.0170409	0.482933	0.116628	0.198965	0.527445	0.813297	0.414084	4	0.414084				0.354811	0.00148394
2023-12-24	EGX30	24691.4	24305.1	25780.7	23728.2	923810000	0.0159	0.0157704	0.0134719	0.0590828	1.70711e-05	0.270774	0.127783	0.285514	0.588749	0.781277	0.445831	4				12.585	-0.58	79.2333	-0.032171	0.0310335	3.88	-0.02			-0.58	0.0310335	-0.02	0.0157704	0.445831	0.0968043	0.185623	0.471019	0.754995	0.37711	4	0.37711				0.414084	-0.0170409
2023-12-31	EGX30	25350.3	24691.4	25653.2	24691.4	829140000	0.0267	0.0263336	0.0187845	0.0590828	3.17601e-05	0.238516	0.250911	0.344777	0.644143	0.653766	0.473399	4				13.68	0.9	76.88	0.00794876	0.0436496	4.05	0.17			0.9	0.0436496	0.17	0.0263336	0.473399	0.192028	0.231618	0.540187	0.631906	0.398935	4	0.398935				0.37711	0.0157704
2024-01-07	EGX30	25519.2	25350.3	25708.3	25278.2	690820000	0.0067	0.00664329	0.0184875	0.0590828	9.61653e-06	0.250614	0.0652962	0.341464	0.725078	0.701587	0.458356	4				12.734	-0.65	78.4	0.0199754	0.0544834	3.96	-0.09			-0.65	0.0544834	-0.09	0.00664329	0.458356	0.0484793	0.229047	0.641245	0.678069	0.39921	4	0.39921				0.398935	0.0263336
2024-01-14	EGX30	26842.7	25519.2	27167	25519.2	1110000000	0.0519	0.0505597	0.0189483	0.0590828	4.55493e-05	0.255998	0.366496	0.346604	0.479804	0.722868	0.478943	4				13.862	0.6	80.108	0.0102118	0.0320628	4.15	0.19			0.6	0.0320628	0.19	0.0505597	0.478943	0.281418	0.233036	0.334986	0.698612	0.387013	4	0.387013				0.39921	0.00664329
2024-01-21	EGX30	27666.2	26842.7	28120.9	26842.7	1520000000	0.0307	0.0302179	0.0179998	0.0590828	1.98802e-05	0.219212	0.15133	0.336023	0.239902	0.577457	0.326178	4				13.118	-0.04	82.312	0.0320661	0.0179203	4.15	0			-0.04	0.0179203	0	0.0302179	0.326178	0.115015	0.224824	0.0354348	0.558243	0.233379	4	0.233379				0.387013	0.0505597
2024-01-28	EGX30	28434.4	27666.2	30695.6	26465.1	1570000000	0.0278	0.0273879	0.0179664	0.0586839	1.74445e-05	0.225461	0.130913	0.333499	0.210646	0.602162	0.319305	4				13.798	0.59	82.57	-0.0466686	0.0377831	4.03	-0.12			0.59	0.0377831	-0.12	0.0273879	0.319305	0.0992252	0.222343	0	0.582091	0.225915	4	0.225915				0.233379	0.0302179
2024-02-04	EGX30	28411.4	28434.4	28477.7	27034.5	1450000000	-0.0008	-0.0008078	0.0211245	0.0586839	5.57103e-07	0.236742	0	0.368729	0.280861	0.646753	0.324086	4				13.056	-0.92	81.506	0.0495442	0.0290372	4.17	0.14			-0.92	0.0290372	0.14	-0.0008078	0.324086	0	0.249686	0.0865777	0.625136	0.24035	4	0.24035				0.225915	0.0273879
2024-02-11	EGX30	28926.2	28411.4	29073.3	27682.8	1810000000	0.0181	0.0179552	0.0140149	0.0586839	9.92e-06	0.247113	0.06784	0.289419	0.0702153	0.687748	0.278806	4				14.482	1.31	84.444	0.0154342	0.0129895	4.3	0.13			1.31	0.0129895	0.13	0.0179552	0.278806	0.0504465	0.188131	0	0.66471	0.225822	4	0.225822				0.24035	-0.0008078
2024-02-18	EGX30	29309.7	28926.2	29660.6	28926.2	1770000000	0.0133	0.0131735	0.0117488	0.0586839	7.44266e-06	0.25009	0.0470742	0.26414	0.0936204	0.699514	0.276087	4				14.752	-0.49	85.018	-0.00828113	0.0258966	4.26	-0.04			-0.49	0.0258966	-0.04	0.0131735	0.276087	0.0343868	0.168512	0	0.676068	0.219742	4	0.219742				0.225822	0.0179552
2024-02-25	EGX30	28964.4	29309.7	30035.8	27106.3	1930000000	-0.0118	-0.0118517	0.0135618	0.0586839	6.14078e-06	0.241345	0.0361614	0.284365	0	0.664946	0.246368	4				13.504	-0.64	84.256	0.007574	0.0079973	4.19	-0.07			-0.64	0.0079973	-0.07	-0.0118517	0.246368	0.0259472	0.184209	0	0.642698	0.213213	4	0.213213				0.219742	0.0131735
2024-03-03	EGX30	31300.5	28964.4	32217.8	28564.8	1660000000	0.0807	0.0775675	0.0378963	0.0586839	4.67274e-05	0.228909	0.376371	0.555824	0.157984	0.615788	0.426492	4				14.326	1.63	85.632	-0.00626813	0.0320281	4.09	-0.1			1.63	0.0320281	-0.1	0.0775675	0.426492	0.289055	0.394895	0	0.595245	0.319799	4	0.319799				0.213213	-0.0118517
2024-03-10	EGX30	31316.4	31300.5	34499.4	29959.2	1540000000	0.0005	0.00050753	0.0398121	0.0314917	3.29565e-07	0.218872	0	0.43053	0.2282	0.576117	0.308712	4				14.324	-0.33	84.52	0.0129658	0.0296213	4.31	0.22			-0.33	0.0296213	0.22	0.00050753	0.308712	0	0.278973	0.0208225	0.556949	0.214186	4	0.214186				0.319799	0.0775675
2024-03-17	EGX30	29055	31316.4	31781.2	28167.5	1150000000	-0.0722	-0.0749537	0.0626004	0.0461833	6.51771e-05	0.191122	0.531023	0.625374	0.456399	0.466421	0.519804	4				13.434	-1.35	85.878	-0.00610832	0.0264529	4.22	-0.09			-1.35	0.0264529	-0.09	-0.0749537	0.519804	0.408658	0.540079	0.305762	0.451058	0.426389	4	0.426389				0.214186	0.00050753
2024-03-24	EGX30	27559.3	29055	29538.4	27559.3	943990000	-0.0515	-0.0528473	0.0678471	0.0533966	5.5983e-05	0.202461	0.453954	0.66428	0.576941	0.511246	0.551605	4				13.055	-0.05	85.8	0.0152014	0.0240854	4.2	-0.02			-0.05	0.0240854	-0.02	-0.0528473	0.551605	0.349056	0.60345	0.456276	0.494328	0.475777	4	0.475777				0.426389	-0.0749537
2024-03-31	EGX30	28506.2	27559.3	28659.1	26746.2	922070000	0.0344	0.0337783	0.0495508	0.0533966	3.66332e-05	0.170959	0.291758	0.657316	0.589767	0.386722	0.481391	4				14.994	3.02	90.34	0.0742323	0.0462861	4.39	0.19			3.02	0.0462861	0.19	0.0337783	0.481391	0.223618	0.46674	0.472291	0.374122	0.384193	4	0.384193				0.475777	-0.0528473
2024-04-07	EGX30	28503.8	28506.2	28894.4	28130.5	305290000	-0.0001	-8.45467e-05	0.0494565	0.0533966	2.76939e-07	0.180263	0	0.656263	0.950662	0.423497	0.507606	4				15.638	1.28	92.008	0.00333459	0.0224883	4.5	0.11			1.28	0.0224883	0.11	-8.45467e-05	0.507606	0	0.465923	0.922919	0.409622	0.449616	4	0.449616				0.384193	0.0337783
2024-04-14	EGX30	28332.7	28503.8	30072.1	27796.1	1270000000	-0.006	-0.00602081	0.0356447	0.0533966	4.74079e-06	0.160541	0.0244262	0.502189	0.386184	0.345542	0.314585	4				18.51	1.4	89.594	-0.0570068	0.0348454	4.62	0.12			1.4	0.0348454	0.12	-0.00602081	0.314585	0.0168716	0.346342	0.218088	0.33437	0.228918	4	0.228918				0.449616	-8.45467e-05
2024-04-21	EGX30	25917.6	28332.7	28941.4	25502.3	1130000000	-0.0852	-0.089093	0.052191	0.072298	7.88433e-05	0.262624	0.645577	0.766227	0.468102	0.749062	0.657242	4				15.8	-3.68	88.532	0.0223718	0.0281332	4.67	0.05			-3.68	0.0281332	0.05	-0.089093	0.657242	0.497251	0.593479	0.320374	0.723897	0.53375	4	0.53375				0.228918	-0.00602081
2024-04-28	EGX30	26113.7	25917.6	26168.2	24193.9	1060000000	0.0076	0.00753858	0.0451279	0.072298	7.11186e-06	0.255147	0.0443013	0.709924	0.509061	0.719503	0.495697	4				14.776	-1.54	85.726	-0.0732104	0.0607721	4.5	-0.17			-1.54	0.0607721	-0.17	0.00753858	0.495697	0.0322424	0.532327	0.371517	0.695364	0.407863	4	0.407863				0.53375	-0.089093
2024-05-05	EGX30	26003.2	26113.7	26939.9	25638.5	882810000	-0.0042	-0.00424239	0.044501	0.072298	4.80556e-06	0.259012	0.0249691	0.70293	0.612739	0.734781	0.518855	4				12.992	-0.94	82.9475	-0.00251512	0.0152113	4.5	0			-0.94	0.0152113	0	-0.00424239	0.518855	0.0172915	0.526899	0.500975	0.710111	0.438819	4	0.438819				0.407863	0.00753858
2024-05-12	EGX30	26142.8	26003.2	26265.1	24771.8	1170000000	0.0054	0.00535728	0.0462726	0.072298	4.57887e-06	0.255085	0.0230689	0.722693	0.444697	0.719261	0.47743	4				12.776	-0.56	81.61	-0.0138866	0.0367581	4.42	-0.08			-0.56	0.0367581	-0.08	0.00535728	0.47743	0.0158219	0.542238	0.29115	0.69513	0.386085	4	0.386085				0.438819	-0.00424239
2024-05-19	EGX30	27205.1	26142.8	27636.6	26142.8	1180000000	0.0406	0.0398306	0.0191688	0.072298	3.37547e-05	0.275632	0.26763	0.420342	0.438845	0.800477	0.481824	4				12.2	-0.06	80.24	-0.0412071	0.0209847	4.46	0.04			-0.06	0.0209847	0.04	0.0398306	0.481824	0.204958	0.307575	0.283843	0.773529	0.392477	4	0.392477				0.386085	0.00535728
2024-05-26	EGX30	26922.8	27205.1	27689.1	26684	1410000000	-0.0104	-0.0104339	0.0224299	0.072298	7.39993e-06	0.248893	0.046716	0.45672	0.304266	0.694782	0.375621	4				13.39	0.99	80.9175	0.00618962	0.0392669	4.51	0.05			0.99	0.0392669	0.05	-0.0104339	0.375621	0.0341098	0.335809	0.115802	0.671499	0.289305	4	0.289305				0.392477	0.0398306
2024-06-02	EGX30	26428.7	26922.8	27170.9	26241.9	1120000000	-0.0184	-0.0185234	0.0258283	0.072298	1.65387e-05	0.263959	0.12332	0.49463	0.473953	0.754338	0.46156	4				12.74	-0.7	76.586	-0.0163782	0.0503743	4.43	-0.08			-0.7	0.0503743	-0.08	-0.0185234	0.46156	0.0933533	0.365232	0.32768	0.72899	0.378814	4	0.378814				0.289305	-0.0104339
2024-06-09	EGX30	26417.6	26428.7	26556.8	25508.6	798530000	-0.0004	-0.000418194	0.0258928	0.072298	5.23705e-07	0.269693	0	0.49535	0.662054	0.777002	0.483601	4				12.446	0.44	80.638	0.0422342	0.0233957	4.2	-0.23			0.44	0.0233957	-0.23	-0.000418194	0.483601	0	0.365791	0.562551	0.750868	0.419802	4	0.419802				0.378814	-0.0185234
2024-06-16	EGX30																					12.802	0.54	85.044	0.0587388	0.0326217	4.25	0.05			0.54	0.0326217	0.05								0					0.419802	-0.000418194
2024-06-23	EGX30	27766.3	26417.6	27939	26417.6	1170000000	0.0511	0.0497915	0.0306983	0.072298	4.25569e-05	0.301242	0.341412	0.548956	0.444697	0.901709	0.559194	4				12.68	-0.76	86.716	0.00967304	0.0194441	4.36	0.11			-0.76	0.0194441	0.11	0.0497915	0.559194	0.262019	0.407396	0.29115	0.871251	0.457954	4	0.457954
2024-06-30	EGX30	28364.8	27766.3	28460.6	27766.3	902600000	0.0216	0.0213266	0.0294206	0.072298	2.3628e-05	0.272649	0.182745	0.534704	0.60116	0.788689	0.526824	4				12.216	0.04	88.02	0.0159167	0.0214443	4.28	-0.08			0.04	0.0214443	-0.08	0.0213266	0.526824	0.13931	0.396334	0.486516	0.76215	0.446078	4	0.446078				0.457954	0.0497915
2024-07-07	EGX30	28288	28364.8	28886.7	28258.9	810230000	-0.0027	-0.00271161	0.0243991	0.072298	3.34671e-06	0.271774	0.0127406	0.478687	0.655208	0.78523	0.482966	4				12.622	-0.02	86.804	-0.0148858	0.0212997	4.18	-0.1			-0.02	0.0212997	-0.1	-0.00271161	0.482966	0.00783431	0.352858	0.554003	0.758811	0.418377	4	0.418377				0.446078	0.0213266
2024-07-14	EGX30	28653.8	28288	28832.8	27786.4	895440000	0.0129	0.0128508	0.022029	0.072298	1.43514e-05	0.214618	0.104986	0.452248	0.605349	0.559299	0.430471	4				14.648	4.06	86.046	-0.025039	0.0200874	4.25	0.07			4.06	0.0200874	0.07	0.0128508	0.430471	0.0791738	0.332338	0.491747	0.540715	0.360994	4	0.360994				0.418377	-0.00271161
2024-07-21	EGX30	29090.6	28653.8	29375.4	28626.9	973360000	0.0152	0.0151263	0.0102212	0.072298	1.55402e-05	0.224934	0.114951	0.320528	0.559756	0.600076	0.398828	4				16.504	-0.13	82.516	-0.0461232	0.0316753	4.2	-0.05			-0.13	0.0316753	-0.05	0.0151263	0.398828	0.0868805	0.230107	0.434818	0.580077	0.332971	4	0.332971				0.360994	0.0128508
2024-07-28	EGX30	29359.9	29090.6	29674.4	28851.2	828390000	0.0093	0.00921471	0.00793705	0.072298	1.11236e-05	0.239099	0.0779293	0.295048	0.644582	0.656069	0.418407	4				18.526	7	80.262	-0.0375749	0.0509821	3.8	-0.4			7	0.0509821	-0.4	0.00921471	0.418407	0.0582492	0.210331	0.540735	0.634129	0.360861	4	0.360861				0.332971	0.0151263
2024-08-04	EGX30	28750.8	29359.9	29359.9	27125.6	613670000	-0.0207	-0.0209625	0.0168566	0.072298	3.41592e-05	0.245068	0.271021	0.394549	0.770221	0.679665	0.528864	4				27.658	-3.02	78.844	0.034127	0.0412501	3.94	0.14			-3.02	0.0412501	0.14	-0.0209625	0.528864	0.20758	0.287556	0.697612	0.656907	0.462414	4	0.462414				0.360861	0.00921471
2024-08-11	EGX30	29629.1	28750.8	30007.2	28750.8	730020000	0.0305	0.030092	0.0214367	0.072298	4.12209e-05	0.208719	0.330214	0.445641	0.702141	0.535983	0.503495	4				17.01	-5.57	82.474	0.00602597	0.0335589	3.89	-0.05			-5.57	0.0335589	-0.05	0.030092	0.503495	0.253358	0.327211	0.612605	0.518207	0.427845	4	0.427845				0.462414	-0.0209625
2024-08-18	EGX30	30141.1	29629.1	30142.6	29240	933540000	0.0173	0.0171307	0.0216696	0.072298	1.83502e-05	0.215256	0.138505	0.448239	0.583056	0.561822	0.432905	4				16.042	1.06	79.57	-0.0150713	0.0345524	3.81	-0.08			1.06	0.0345524	-0.08	0.0171307	0.432905	0.105097	0.329227	0.463911	0.54315	0.360346	4	0.360346				0.427845	0.030092
2024-08-25	EGX30	30774.2	30141.1	30910.3	29952.8	1260000000	0.021	0.0207873	0.0224882	0.072298	1.64979e-05	0.221757	0.122978	0.457371	0.392035	0.587519	0.389976	4				15.868	-0.86	80.825	-0.00174411	0.034179	3.91	0.1			-0.86	0.034179	0.1	0.0207873	0.389976	0.0930885	0.336315	0.225394	0.567956	0.305688	4	0.305688				0.360346	0.0171307
2024-09-01	EGX30	31029.7	30774.2	31221.7	30648.7	1020000000	0.0083	0.00826846	0.00903454	0.072298	8.10633e-06	0.2432	0.0526372	0.307291	0.532466	0.672279	0.391168	4				19.974	7.38	75.248	-0.0965329	0.0478409	3.72	-0.19			7.38	0.0478409	-0.19	0.00826846	0.391168	0.0386892	0.219833	0.400742	0.649777	0.32726	4	0.32726				0.305688	0.0207873
2024-09-08	EGX30	30497.8	31029.7	31033.6	29803.1	726510000	-0.0171	-0.0172893	0.0171668	0.072298	2.37977e-05	0.236385	0.184167	0.398009	0.704195	0.64534	0.482928	4				17.97	-5.82	72.102	0.0117407	0.0566676	3.66	-0.06			-5.82	0.0566676	-0.06	-0.0172893	0.482928	0.140411	0.290242	0.61517	0.623773	0.417399	4	0.417399				0.32726	0.00826846
2024-09-15	EGX30	30937.7	30497.8	30937.7	30097	619280000	0.0144	0.0143196	0.0166766	0.072298	2.31231e-05	0.227273	0.178512	0.392541	0.766938	0.609323	0.486828	4				17.092	-0.41	74.984	0.0304755	0.0207168	3.73	0.07			-0.41	0.0207168	0.07	0.0143196	0.486828	0.136037	0.285998	0.693513	0.589004	0.426138	4	0.426138				0.417399	-0.0172893
2024-09-22	EGX30	31276.9	30937.7	31475	30818.9	785950000	0.011	0.0109049	0.0144409	0.072298	1.38749e-05	0.199761	0.100991	0.3676	0.669415	0.500573	0.409645	4				15.804	0.81	74.066	-0.0586929	0.0398301	3.75	0.02			0.81	0.0398301	0.02	0.0109049	0.409645	0.0760844	0.266641	0.571742	0.484025	0.349623	4	0.349623				0.426138	0.0143196
2024-09-29	EGX30	31720.5	31276.9	31915.3	31253.6	832750000	0.0142	0.014083	0.0152755	0.072298	1.69115e-05	0.180591	0.126445	0.37691	0.642031	0.424795	0.392545	4				18.918	2.25	75.88	0.101976	0.0591088	3.98	0.23			2.25	0.0591088	0.23	0.014083	0.392545	0.0957697	0.273867	0.537549	0.410875	0.329515	4	0.329515				0.349623	0.0109049
2024-10-06	EGX30	30762.3	31720.5	32184.7	30453.6	623150000	-0.0302	-0.0306726	0.0219429	0.072298	4.92218e-05	0.180971	0.397281	0.451287	0.764674	0.426297	0.509885	4				21.262	1.25	79.342	0.0119056	0.0642259	4.08	0.1			1.25	0.0642259	0.1	-0.0306726	0.509885	0.305226	0.331593	0.690686	0.412324	0.434957	4	0.434957				0.329515	0.014083
2024-10-13	EGX30	30143.9	30762.3	31039.8	29676.9	601910000	-0.0201	-0.0203093	0.0223726	0.072298	3.37414e-05	0.195981	0.267519	0.456082	0.777102	0.485631	0.496583	4				19.412	-2.43	74.584	-0.098367	0.071143	4.08	0			-2.43	0.071143	0	-0.0203093	0.496583	0.204872	0.335314	0.706204	0.469602	0.428998	4	0.428998				0.434957	-0.0306726
2024-10-20	EGX30	30552.8	30143.9	30627.3	29180.4	640640000	0.0136	0.0134757	0.0230654	0.072298	2.10348e-05	0.228005	0.161008	0.46381	0.75444	0.612216	0.497868	4				19.044	2.3	74.69	0.0386919	0.0388714	4.25	0.17			2.3	0.0388714	0.17	0.0134757	0.497868	0.1225	0.341312	0.677907	0.591797	0.433379	4	0.433379				0.428998	-0.0203093
2024-10-27	EGX30	30658	30552.8	30980.9	30371.3	490020000	0.0034	0.00343665	0.0204654	0.072298	7.01329e-06	0.221016	0.043475	0.434806	0.842572	0.58459	0.476361	4				20.906	1.55	72.61	-0.0266682	0.0599715	4.37	0.12			1.55	0.0599715	0.12	0.00343665	0.476361	0.0316034	0.318801	0.787952	0.565129	0.425871	4	0.425871				0.433379	0.0134757
2024-11-03	EGX30	31267.5	30658	31370.7	30650	491300000	0.0199	0.0196846	0.0175787	0.072298	4.00664e-05	0.24979	0.320537	0.402604	0.841823	0.69833	0.565823	4				17.776	-6.94	75.632	0.00555294	0.0412131	4.3	-0.07			-6.94	0.0412131	-0.07	0.0196846	0.565823	0.245875	0.293808	0.787017	0.674925	0.500406	4	0.500406				0.425871	0.00343665
2024-11-10	EGX30	31462.2	31267.5	31799.4	31267.5	555930000	0.0062	0.00620888	0.00733381	0.072298	1.11685e-05	0.251623	0.078305	0.288319	0.804006	0.705576	0.469051	4				14.83	1.2	72.89	-0.00800059	0.0271413	4.43	0.13			1.2	0.0271413	0.13	0.00620888	0.469051	0.0585398	0.20733	0.739798	0.681919	0.421897	4	0.421897				0.500406	0.0196846
2024-11-17	EGX30	30631.8	31462.2	31492.5	30503.6	399940000	-0.0264	-0.0267485	0.019593	0.072298	6.68812e-05	0.250879	0.545307	0.425074	0.89528	0.702633	0.642073	4				16.24	-0.9	74.838	0.0354434	0.0207485	4.41	-0.02			-0.9	0.0207485	-0.02	-0.0267485	0.642073	0.419705	0.311248	0.853766	0.679079	0.565949	4	0.565949				0.421897	0.00620888
2024-11-24	EGX30	30242.1	30631.8	30780	29763.7	366990000	-0.0127	-0.0128027	0.0204841	0.072298	3.48857e-05	0.226437	0.27711	0.435014	0.91456	0.606016	0.558175	4				14.042	-1.73	74.164	-0.0258233	0.0263604	4.18	-0.23			-1.73	0.0263604	-0.23	-0.0128027	0.558175	0.21229	0.318963	0.87784	0.585812	0.498726	4	0.498726				0.565949	-0.0267485
2024-12-01	EGX30	30839.6	30242.1	31035.1	30242.1	596220000	0.0198	0.0195626	0.0204382	0.072298	3.28111e-05	0.204191	0.25972	0.434503	0.780431	0.518081	0.498184	4				13.28	-0.74	73.97	-0.00513723	0.0348452	4.15	-0.03			-0.74	0.0348452	-0.03	0.0195626	0.498184	0.198841	0.318566	0.710361	0.500926	0.432174	4	0.432174				0.498726	-0.0128027
2024-12-08	EGX30	30795.1	30839.6	31232.7	30581.6	514490000	-0.0014	-0.00144334	0.0195733	0.072298	2.80539e-06	0.206363	0.00820304	0.424854	0.828253	0.526668	0.446995	4				13.936	1.04	74.032	0.0149327	0.0240427	4.4	0.25			1.04	0.0240427	0.25	-0.00144334	0.446995	0.0043251	0.311077	0.770074	0.509216	0.398673	4	0.398673				0.432174	0.0195626
2024-12-15	EGX30	30526.7	30795.1	30932.8	30211.8	449810000	-0.0087	-0.00875322	0.0144032	0.072298	1.94598e-05	0.24214	0.147806	0.36718	0.866099	0.668091	0.512294	4				20.126	4.55	73.794	-0.0229616	0.029093	4.52	0.12			4.55	0.029093	0.12	-0.00875322	0.512294	0.11229	0.266315	0.81733	0.645734	0.460417	4	0.460417				0.398673	-0.00144334
2024-12-22	EGX30	29958	30526.7	30626.6	29810.4	346960000	-0.0186	-0.0188066	0.0162564	0.072298	5.42041e-05	0.266934	0.439043	0.387852	0.92628	0.766098	0.629818	4				15.4325	-2.41	73.13	0.00789335	0.0242816	4.62	0.1			-2.41	0.0242816	0.1	-0.0188066	0.629818	0.337524	0.282359	0.892474	0.740342	0.563175	4	0.563175				0.460417	-0.00875322
2024-12-29	EGX30	30060.5	29958	30127.5	29237.9	356560000	0.0034	0.00341595	0.00966753	0.072298	9.5803e-06	0.227539	0.0649925	0.314352	0.920663	0.610373	0.477595	4				17.2025	0.18	75.42	0.0392103	0.0233955	4.6	-0.02			0.18	0.0233955	-0.02	0.00341595	0.477595	0.0482444	0.225314	0.88546	0.590018	0.437259	4	0.437259				0.563175	-0.0188066
2025-01-05	EGX30	29444.7	30060.5	30280	29444.7	313200000	-0.0205	-0.0206991	0.0110711	0.072298	6.60892e-05	0.242538	0.538668	0.330009	0.946034	0.669661	0.621093	4				17.834	3.41	78.136	0.0388597	0.0246752	4.77	0.17			3.41	0.0246752	0.17	-0.0206991	0.621093	0.41457	0.237466	0.91714	0.647249	0.554106	4	0.554106				0.437259	0.00341595
2025-01-12	EGX30	29605.1	29444.7	29730.6	28350	493910000	0.0054	0.00543509	0.0140051	0.072298	1.10042e-05	0.254518	0.0769282	0.362738	0.840295	0.717019	0.499245	4				17.318	-3.57	82.794	0.0400594	0.0414516	4.61	-0.16			-3.57	0.0414516	-0.16	0.00543509	0.499245	0.057475	0.262868	0.78511	0.692965	0.449605	4	0.449605				0.554106	-0.0206991
2025-01-19	EGX30	29997.7	29605.1	30258.3	29605.1	431920000	0.0133	0.0131731	0.0146373	0.072298	3.04988e-05	0.208221	0.240338	0.369792	0.876567	0.534012	0.505177	4				15.168	-1.12	79.916	-0.0533113	0.028399	4.63	0.02			-1.12	0.028399	0.02	0.0131731	0.505177	0.183852	0.268342	0.830401	0.516305	0.449725	4	0.449725				0.449605	0.00543509
2025-01-26	EGX30	30010.6	29997.7	30276.5	29646.6	470470000	0.0004	0.00043094	0.0145031	0.072298	9.15978e-07	0.201056	0	0.368294	0.854011	0.505691	0.431999	4				16.628	1.58	77.372	-0.0205372	0.0248274	4.58	-0.05			1.58	0.0248274	-0.05	0.00043094	0.431999	0	0.26718	0.802236	0.488966	0.389595	4	0.389595				0.449725	0.0131731
2025-02-02	EGX30	30011.8	30010.6	30198.2	29596.5	577480000	0	4.06514e-05	0.00611686	0.072298	7.03946e-08	0.176665	0	0.274743	0.791396	0.409276	0.368854	4				16.728	0.11	75.4	-0.0320207	0.0262001	4.49	-0.09			0.11	0.0262001	-0.09	4.06514e-05	0.368854	0	0.20733	0.724053	0.395894	0.331819	4	0.331819				0.389595	0.00043094
2025-02-09	EGX30	29997.1	30011.8	30224.3	29040.9	515090000	-0.0005	-0.000490927	0.00660057	0.072298	9.53089e-07	0.118729	0	0.280139	0.827902	0.180264	0.322076	4				15.518	-1.77	76.012	0.00680592	0.0410273	4.47	-0.02			-1.77	0.0410273	-0.02	-0.000490927	0.322076	0	0.20733	0.769636	0.174823	0.287947	4	0.287947				0.331819	4.06514e-05
2025-02-16	EGX30	30914.7	29997.1	30990.3	29997.1	1020000000	0.0306	0.0301314	0.0150737	0.072298	2.95406e-05	0.114455	0.232306	0.374659	0.532466	0.163368	0.3257	4				15.972	3.44	76.088	-0.00413141	0.0308178	4.42	-0.05			3.44	0.0308178	-0.05	0.0301314	0.3257	0.17764	0.27212	0.400742	0.158513	0.252254	4	0.252254				0.287947	-0.000490927
2025-02-23	EGX30	30610.4	30914.7	31056.4	30561.2	692790000	-0.0098	-0.00989132	0.017398	0.072298	1.42775e-05	0.147463	0.104366	0.400588	0.723925	0.293847	0.380682	4				19.654	1.42	74.252	-0.00160385	0.0321838	4.24	-0.18			1.42	0.0321838	-0.18	-0.00989132	0.380682	0.0786947	0.292244	0.639806	0.284468	0.323803	4	0.323803				0.252254	0.0301314
2025-03-02	EGX30	30947.4	30610.4	31095.6	30610.4	605130000	0.011	0.0109492	0.0172266	0.072298	1.80939e-05	0.174596	0.136356	0.398676	0.775218	0.401098	0.427837	4				23.292	3.74	71.93	-0.0308344	0.0386369	4.32	0.08			3.74	0.0386369	0.08	0.0109492	0.427837	0.103435	0.29076	0.703852	0.387999	0.371511	4	0.371511				0.323803	-0.00989132
2025-03-09	EGX30	31290.6	30947.4	31331.4	30827.7	745130000	0.0111	0.0110281	0.0163469	0.072298	1.48002e-05	0.168605	0.108748	0.388863	0.6933	0.377418	0.392082	4				25.088	-1.6	71.542	-0.00761618	0.0356485	4.31	-0.01			-1.6	0.0356485	-0.01	0.0110281	0.392082	0.0820832	0.283144	0.601566	0.365141	0.332983	4	0.332983				0.371511	0.0109492
2025-03-16	EGX30	31677.6	31290.6	31709.4	31244.3	892400000	0.0124	0.0122908	0.0106747	0.072298	1.37728e-05	0.191065	0.100135	0.325587	0.607128	0.466198	0.374762	4				20.238	-2.49	72.21	0.0096833	0.0092815	4.25	-0.06			-2.49	0.0092815	-0.06	0.0122908	0.374762	0.0754225	0.234034	0.493968	0.450842	0.313567	4	0.313567				0.332983	0.0110281
2025-03-23	EGX30	32026.1	31677.6	32073	31566.3	507790000	0.011	0.0109433	0.000659784	0.0575376	2.15508e-05	0.170226	0.165333	0.186615	0.832174	0.383824	0.391986	4				18.66	2.37	74.35	0.0278305	0.0213345	4.27	0.02			2.37	0.0213345	0.02	0.0109433	0.391986	0.125845	0.126208	0.774969	0.371324	0.349587	4	0.349587				0.313567	0.0122908
2025-03-30	EGX30	31699.6	32026.1	32037.5	31606.3	60040000	-0.0102	-0.010249	0.0108524	0.048838	0.000170703	0.217682	1	0.201035	1	0.571412	0.693112	4				28.178	23.66	74.636	-0.0885584	0.0934055	4.01	-0.26			23.66	0.0934055	-0.26	-0.010249	0.693112	1	0.106638	1	0.552407	0.664761	4	0.664761				0.349587	0.0109433
2025-04-06	EGX30	30810.7	31699.6	31016	29993.3	753950000	-0.028	-0.0284414	0.0193653	0.0494023	3.77232e-05	0.180133	0.300895	0.299043	0.688139	0.422985	0.427766	4				42.242	-7.75	66.098	-0.0226358	0.0646085	4.48	0.47			-7.75	0.0646085	0.47	-0.0284414	0.427766	0.230684	0.183444	0.595122	0.409128	0.354594	4	0.354594				0.664761	-0.010249
2025-04-13	EGX30	31063	30810.7	31326.2	30793.5	661360000	0.0082	0.00815376	0.0182959	0.0494023	1.23288e-05	0.196651	0.0880311	0.287113	0.742316	0.488279	0.401435	4				30.825	-7.91	67.7575	0.0367256	0.0304438	4.34	-0.14			-7.91	0.0304438	-0.14	0.00815376	0.401435	0.0660617	0.174185	0.662769	0.472157	0.343793	4	0.343793				0.354594	-0.0284414
2025-04-20	EGX30	31640.2	31063	31640.2	30844.2	305740000	0.0186	0.0184133	0.020678	0.0494023	6.02254e-05	0.196236	0.489516	0.313687	0.950399	0.486639	0.56006	4				28.83	-4.81	67.92	-0.0343344	0.0176568	4.29	-0.05			-4.81	0.0176568	-0.05	0.0184133	0.56006	0.376558	0.194809	0.92259	0.470575	0.491133	4	0.491133				0.343793	0.00815376
2025-04-27	EGX30	32126.2	31640.2	32218.7	31620.5	700000000	0.0154	0.0152434	0.0216189	0.0286208	2.17763e-05	0.199438	0.167223	0.212094	0.719707	0.499294	0.39958	4				24.26	-2.16	63.496	-0.0843686	0.0415762	4.33	0.04			-2.16	0.0415762	0.04	0.0152434	0.39958	0.127307	0.121458	0.634538	0.48279	0.341523	4	0.341523				0.491133	0.0184133
2025-05-04	EGX30	31772	32126.2	32480.5	31636.9	944900000	-0.011	-0.0110859	0.0132261	0.0286208	1.17323e-05	0.212626	0.0830314	0.118471	0.576409	0.551423	0.332334	4				23.266	-0.78	62.29	0.0427626	0.0575115	4.37	0.04			-0.78	0.0575115	0.04	-0.0110859	0.332334	0.0621951	0.0487938	0.455611	0.533112	0.274928	4	0.274928				0.341523	0.0152434
2025-05-11	EGX30	31941.2	31772	32022.6	31428	609290000	0.0053	0.00530849	0.0132687	0.0286208	8.71258e-06	0.213324	0.057719	0.118945	0.772783	0.554182	0.375908	4				18.06	-4.66	65.536	0.0145221	0.0429117	4.43	0.06			-4.66	0.0429117	0.06	0.00530849	0.375908	0.0426193	0.0491622	0.700812	0.535775	0.332092	4	0.332092				0.274928	-0.0110859
2025-05-18	EGX30	31975.6	31941.2	32093	31317.2	1040000000	0.0011	0.0010789	0.0109057	0.0286208	1.03741e-06	0.245557	0	0.0925856	0.520763	0.681597	0.323736	4				19.934	5.05	65.864	0.00321568	0.030288	4.51	0.08			5.05	0.030288	0.08	0.0010789	0.323736	0	0.0287038	0.386129	0.658772	0.268401	4	0.268401				0.332092	0.00530849
2025-05-25	EGX30	32696.8	31975.6	32696.8	31895.9	1260000000	0.0226	0.0223029	0.0138104	0.0286208	1.77007e-05	0.196881	0.13306	0.124988	0.392035	0.489189	0.284818	4				19.318	-3.72	64.74	-0.0168045	0.0325634	4.41	-0.1			-3.72	0.0325634	-0.1	0.0223029	0.284818	0.100886	0.0538522	0.225394	0.473036	0.213292	4	0.213292				0.268401	0.0010789
2025-06-01	EGX30	32677.9	32696.8	32677.9	32201.6	636280000	-0.0006	-0.000578818	0.0104807	0.0286208	9.0969e-07	0.196717	0	0.0878442	0.756991	0.488538	0.333343	4				17.782	-1.8	67.176	0.0559312	0.0413244	4.51	0.1			-1.8	0.0413244	0.1	-0.000578818	0.333343	0	0.0250239	0.681093	0.472408	0.294631	4	0.294631				0.213292	0.0223029
2025-06-08	EGX30	32511.7	32677.9	33088.1	32318.5	600030000	-0.0051	-0.00509868	0.0122004	0.0286208	8.49738e-06	0.199703	0.0559151	0.107029	0.778202	0.500343	0.360372	4				18.042	4.05	71.054	0.110932	0.0825447	4.41	-0.1			4.05	0.0825447	-0.1	-0.00509868	0.360372	0.0412242	0.0399136	0.707578	0.483803	0.31813	4	0.31813				0.294631	-0.000578818
2025-06-15	EGX30	30248.4	32511.7	31459.9	30002.5	908450000	-0.0696	-0.0721548	0.0406579	0.0437563	7.94263e-05	0.259924	0.650464	0.506115	0.597737	0.738386	0.623176	4				20.728	-0.2	78.246	0.0352909	0.0590225	4.38	-0.03			-0.2	0.0590225	-0.03	-0.0721548	0.623176	0.50103	0.336763	0.482242	0.713592	0.508407	4	0.508407				0.31813	-0.00509868
2025-06-22	EGX30	33002.8	30248.4	33002.8	29740.7	896720000	0.0911	0.0871493	0.0653349	0.0437563	9.71868e-05	0.203021	0.799338	0.612283	0.6046	0.513457	0.63242	4				17.396	-4.3	69.962	-0.12657	0.0939406	4.29	-0.09			-4.3	0.0939406	-0.09	0.0871493	0.63242	0.616165	0.550415	0.490812	0.496462	0.538463	4	0.538463				0.508407	-0.0721548
2025-06-29	EGX30	32820.5	33206.8	33381	32594.5	664290000	-0.0055	-0.00554091	0.0654555	0.0437563	8.34109e-06	0.210105	0.0546051	0.612283	0.740601	0.54146	0.487237	4				16.812	1.16	69.606	0.0236478	0.050746	4.35	0.06			1.16	0.050746	0.06	-0.00554091	0.487237	0.040211	0.550467	0.660628	0.523494	0.4437	4	0.4437				0.538463	0.0871493
2025-07-06	EGX30	33324.4	32913.7	33383.4	32888.2	774300000	0.0154	0.0152362	0.0656043	0.0437563	1.96774e-05	0.19886	0.14963	0.612283	0.676232	0.497009	0.483788	4				16.544	-1.08	71.774	0.0143968	0.036568	4.43	0.08			-1.08	0.036568	0.08	0.0152362	0.483788	0.1137	0.550467	0.580254	0.480585	0.431251	4	0.431251				0.4437	-0.00554091
2025-07-13	EGX30	33821	33324.4	34089.4	33041.3	802620000	0.0149	0.0147935	0.040665	0.0437563	1.84316e-05	0.212933	0.139187	0.506195	0.659661	0.55264	0.46442	4				16.934	0.01	70.656	-0.0139745	0.0310945	4.44	0.01			0.01	0.0310945	0.01	0.0147935	0.46442	0.105624	0.336825	0.559563	0.534286	0.384074	4	0.384074				0.431251	0.0152362
2025-07-20	EGX30	34125.1	33821	34323.8	33723.1	704500000	0.009	0.00895097	0.00969979	0.0437563	1.27054e-05	0.219751	0.0911883	0.160768	0.717073	0.57959	0.387155	4				15.768	-1.48	70.086	-0.0260903	0.0424752	4.4	-0.04			-1.48	0.0424752	-0.04	0.00895097	0.387155	0.0685034	0.0687301	0.63125	0.560302	0.332196	4	0.332196				0.384074	0.0147935
2025-07-27	EGX30	34198	34125.1	34683	33800.3	1010000000	0.0021	0.00213339	0.00613922	0.0437563	2.11227e-06	0.219593	0.00239311	0.121049	0.538317	0.578965	0.310181	4				16.718	5.45	72.408	0.0188874	0.058047	4.23	-0.17			5.45	0.058047	-0.17	0.00213339	0.310181	0	0.0504671	0.408048	0.559698	0.254553	4	0.254553				0.332196	0.00895097
2025-08-03	EGX30	35809.4	34198	35907.7	34074.5	797290000	0.0471	0.0460421	0.0194103	0.0437563	5.77483e-05	0.258611	0.468752	0.269092	0.662779	0.733196	0.533455	4				16.772	-5.23	68.166	-0.049095	0.0273092	4.27	0.04			-5.23	0.0273092	0.04	0.0460421	0.533455	0.3605	0.152803	0.563457	0.708581	0.446335	4	0.446335				0.254553	0.00213339
2025-08-10	EGX30	35576.4	35809.4	36282.7	35449.5	804330000	-0.0065	-0.00652625	0.0231448	0.0437563	8.1139e-06	0.267767	0.0527007	0.310752	0.65866	0.769391	0.447876	4				15.078	-0.06	67.166	0.00193352	0.0326727	4.33	0.06			-0.06	0.0326727	0.06	-0.00652625	0.447876	0.0387382	0.185136	0.558313	0.743521	0.381427	4	0.381427				0.446335	0.0460421
2025-08-17	EGX30	35622.3	35576.4	36221.8	35523.1	858240000	0.0013	0.00128766	0.0238592	0.0437563	1.50035e-06	0.271675	0	0.318721	0.627116	0.784838	0.432669	4				15.414	-0.87	67.822	0.0146031	0.0326124	4.26	-0.07			-0.87	0.0326124	-0.07	0.00128766	0.432669	0	0.191321	0.518926	0.758433	0.36717	4	0.36717				0.381427	-0.00652625
2025-08-24	EGX30	35727.2	35622.3	35995.8	35305.5	782580000	0.0029	0.0029413	0.0237654	0.0437563	3.75847e-06	0.25753	0.016192	0.317674	0.671387	0.728925	0.433544	4				14.81	1.14	67.77	-0.00675877	0.0297002	4.23	-0.03			1.14	0.0297002	-0.03	0.0029413	0.433544	0.0105035	0.190509	0.574204	0.704458	0.369919	4	0.369919				0.36717	0.00128766
2025-08-31	EGX30	34762	35727.2	35886.2	34708.2	439200000	-0.027	-0.0273881	0.0139368	0.0437563	6.23589e-05	0.278703	0.5074	0.208033	0.872308	0.812617	0.600089	4				16.024	-0.18	66.854	-0.0438488	0.0358155	4.1	-0.13			-0.18	0.0358155	-0.13	-0.0273881	0.600089	0.390389	0.105414	0.825082	0.785248	0.526533	4	0.526533				0.369919	0.0029413
2025-09-07	EGX30	34937.4	34762	34940.5	34217.7	734190000	0.005	0.00503506	0.015315	0.0437563	6.85798e-06	0.282114	0.0421732	0.223408	0.699701	0.8261	0.447845	4				14.994	-0.42	67.23	0.0444384	0.0405403	4.06	-0.04			-0.42	0.0405403	-0.04	0.00503506	0.447845	0.0305966	0.117346	0.609558	0.798263	0.388941	4	0.388941				0.526533	-0.0273881
2025-09-14	EGX30	35403	34937.4	35403	34707.4	628690000	0.0133	0.0132375	0.0177934	0.0437563	2.10557e-05	0.292266	0.161183	0.251055	0.761432	0.86623	0.509975	4				15.784	0.69	68.328	-0.0121555	0.0356684	4.14	0.08			0.69	0.0356684	0.08	0.0132375	0.509975	0.122635	0.138804	0.686638	0.837003	0.44627	4	0.44627				0.388941	0.00503506
2025-09-21	EGX30	35671.4	35403	35988.9	34925.2	674570000	0.0076	0.00755353	0.0183224	0.0437563	1.11975e-05	0.284289	0.0785488	0.256957	0.734586	0.834697	0.476197	4				16.19	-0.16	69.22	0.0593517	0.03314	4.2	0.06			-0.16	0.03314	0.06	0.00755353	0.476197	0.0587283	0.143384	0.653118	0.806563	0.415448	4	0.415448				0.44627	0.0132375
2025-09-28	EGX30	36900.7	35671.4	37035.8	35698.3	900560000	0.0345	0.0338804	0.0130933	0.0437563	3.76215e-05	0.257285	0.300043	0.198624	0.602353	0.727957	0.457244	4				16.394	1.36	67.152	-0.0731678	0.0468631	4.13	-0.07			1.36	0.0468631	-0.07	0.0338804	0.457244	0.230025	0.0981111	0.488006	0.703524	0.379917	4	0.379917				0.415448	0.00755353
2025-10-05	EGX30	37376.9	36900.7	37389.5	36905.2	466010000	0.0129	0.0128231	0.0116293	0.0426614	2.75169e-05	0.283361	0.215343	0.176388	0.85662	0.831032	0.519846	4				17.6	5.01	66.65	-0.0263536	0.0455469	4.05	-0.08			5.01	0.0455469	-0.08	0.0128231	0.519846	0.164521	0.0794187	0.805495	0.803025	0.463115	4	0.463115				0.379917	0.0338804
2025-10-12	EGX30	37677.2	37376.9	37858.8	37096.3	875220000	0.008	0.0080012	0.0124414	0.0426614	9.14193e-06	0.31903	0.061318	0.185447	0.617181	0.972024	0.458992	4				21.314	-0.88	62.358	-0.0506316	0.0295689	4.02	-0.03			-0.88	0.0295689	-0.03	0.0080012	0.458992	0.0454026	0.0864499	0.50652	0.939127	0.394375	4	0.394375				0.463115	0.0128231
2025-10-19	EGX30	37687	37677.2	38182	37502.9	773800000	0.0003	0.000261397	0.0143885	0.0426614	3.3781e-07	0.285282	0	0.207167	0.676524	0.838624	0.430579	4				17.674	-4.41	63.222	0.0719826	0.0673716	4.02	0			-4.41	0.0673716	0	0.000261397	0.430579	0	0.103307	0.580619	0.810353	0.37357	4	0.37357				0.394375	0.0080012
2025-10-26	EGX30	38267.8	37687	38409.3	37700.3	1030000000	0.0154	0.0152925	0.00662162	0.0426614	1.48471e-05	0.266697	0.109141	0.120525	0.526615	0.765159	0.38036	4				16.696	1.07	65.022	-0.00548615	0.02839	4.11	0.09			1.07	0.02839	0.09	0.0152925	0.38036	0.0823873	0.0444499	0.393436	0.739436	0.314927	4	0.314927				0.37357	0.000261397
2025-11-02	EGX30	39949.7	38267.8	40101.3	38007.3	909030000	0.0439	0.0430114	0.0186203	0.0426614	4.73157e-05	0.184915	0.381302	0.254375	0.597397	0.441889	0.418741	4				18.552	1.64	64.3	-0.0266352	0.0270612	4.11	0			1.64	0.0270612	0	0.0430114	0.418741	0.292869	0.139946	0.481818	0.427376	0.335502	4	0.335502				0.314927	0.0152925
2025-11-09	EGX30	40190.6	39949.7	40950.8	39984.2	954490000	0.006	0.00601347	0.0189514	0.0426614	6.3002e-06	0.175928	0.0374976	0.258067	0.570797	0.406365	0.318182	4				18.444	0.75	62.868	-0.00424629	0.0418322	4.14	0.03			0.75	0.0418322	0.03	0.00601347	0.318182	0.0269806	0.142813	0.448604	0.393084	0.25287	4	0.25287				0.335502	0.0430114
2025-11-16	EGX30	40302.4	40190.6	41443.1	40207.2	752490000	0.0028	0.00277714	0.0182784	0.0426614	3.6906e-06	0.180378	0.0156231	0.25056	0.688993	0.423952	0.344782	4				24.116	3.6	63.644	-0.0106156	0.0346166	4.06	-0.08			3.6	0.0346166	-0.08	0.00277714	0.344782	0.0100636	0.136986	0.596188	0.410061	0.288325	4	0.288325				0.25287	0.00601347
2025-11-23	EGX30	40039.2	40302.4	40808.2	39536.7	2350000000	-0.0065	-0.0065508	0.0217933	0.0426614	2.78757e-06	0.171037	0.00805372	0.28977	0	0.38703	0.171213	4				17.966	-7.08	64.376	0.0203397	0.0382497	4.02	-0.04			-7.08	0.0382497	-0.04	-0.0065508	0.171213	0.00420962	0.167418	0	0.374419	0.136512	4	0.136512				0.288325	0.00277714
2025-11-30	EGX30	41499.1	40039.2	41780	40066.2	3190000000	0.0365	0.035811	0.0183235	0.0426614	1.1226e-05	0.197055	0.0787876	0.251063	0	0.489877	0.204932	4				16.22	-0.94	63.982	0.00544791	0.0165985	4.14	0.12			-0.94	0.0165985	0.12	0.035811	0.204932	0.058913	0.137376	0	0.4737	0.167497	4	0.167497				0.136512	-0.0065508
2025-12-07	EGX30	42033.8	41499.1	42346.4	41547.3	1950000000	0.0129	0.0128026	0.0182054	0.0426614	6.56542e-06	0.190714	0.0397208	0.249746	0	0.464809	0.188569	4				15.99	0.33	62.604	-0.0365171	0.0300432	4.19	0.05			0.33	0.0300432	0.05	0.0128026	0.188569	0.0287	0.136354	0	0.449501	0.153639	4	0.153639				0.167497	0.035811
2025-12-14	EGX30	40926.9	42033.8	42624.1	40926.9	3980000000	-0.0263	-0.026687	0.0267229	0.0426614	6.70528e-06	0.121256	0.0408932	0.344761	0	0.190254	0.143977	4				16.476	-0.83	60.826	-0.0123118	0.0322411	4.16	-0.03			-0.83	0.0322411	-0.03	-0.026687	0.143977	0.0296067	0.210098	0	0.184467	0.106043	4	0.106043				0.153639	0.0128026
2025-12-21	EGX30	41253	40926.9	41618	40904.8	1110000000	0.008	0.00793775	0.0258107	0.0426614	7.15113e-06	0.20362	0.0446304	0.334585	0.479804	0.515824	0.343711	4				13.7875	-1.31	63.2067	0.0375894	0.0274028	4.14	-0.02			-1.31	0.0274028	-0.02	0.00793775	0.343711	0.0324969	0.2022	0.334986	0.498748	0.267108	4	0.267108				0.106043	-0.026687
2025-12-28	EGX30	41829	41253	41979.5	41264.7	870460000	0.014	0.0138648	0.0192844	0.0426614	1.59282e-05	0.18441	0.118202	0.261783	0.619966	0.439893	0.359961	4				14.4975	0.91	62.1825	-0.0273728	0.0243488	4.19	0.05			0.91	0.0243488	0.05	0.0138648	0.359961	0.0893953	0.145696	0.509998	0.425449	0.292635	4	0.292635				0.267108	0.00793775
2010-01-03	JSE_TOP40	25586.7	24997	25624.3	24972.7	387540000	0.0236								0.902535		0.902535	1	97.5224	0.12332	0	19.148		79.818		0.0201703	3.83		0.12332	4.58008		0.0201703			0.902535			0.904433		0.904433	1	0.904433	0.998841	1	0.12332
2010-01-10	JSE_TOP40	25278.6	25586.7	25936.7	25238.2	570630000	-0.012	-0.0121157			2.12321e-05		0.162662		0.795404		0.479033	2	97.5224	0.12332	0	17.838	-0.22	78.31	-0.0409209	0.0268501	3.7	-0.13	0.12332	4.58008	-0.22	0.0268501	-0.13	-0.0121157	0.479033	0.239055		0.638404		0.438729	2	0.438729	0.999797	1	0.12332	0.904433
2010-01-17	JSE_TOP40	24428.4	25278.6	25527.5	24297.7	685630000	-0.0336	-0.0342114			4.98977e-05		0.402946		0.728115		0.56553	2	97.5224	0.12332	0	21.46	9.4	74.2825	-0.0551015	0.031831	3.62	-0.08	0.12332	4.58008	9.4	0.031831	-0.08	-0.0342114	0.56553	0.604828		0.471309		0.538069	2	0.538069	0.999516	1	0.12332	0.438729	-0.0121157
2010-01-24	JSE_TOP40	24041.3	24428.4	24699	23777.5	683540000	-0.0158	-0.0159753			2.33714e-05		0.180594		0.729338		0.454966	2	97.5224	0.12332	0	24.29	-2.69	71.882	-0.0212611	0.0318914	3.63	0.01	0.12332	4.58008	-2.69	0.0318914	0.01	-0.0159753	0.454966	0.266352		0.474346		0.370349	2	0.370349	0.994702	1	0.12332	0.538069	-0.0342114
2010-01-31	JSE_TOP40	23111.2	24041.3	24452.3	23062.5	608680000	-0.0387	-0.039452	0.0134213		6.48157e-05		0.527993	0.179998	0.77314		0.493711	3	97.5224	0.12332	0	23.572	1.49	72.54	-0.0154274	0.0752261	3.59	-0.04	0.12332	4.58008	1.49	0.0752261	-0.04	-0.039452	0.493711	0.795181	0.189192	0.583117		0.522497	3	0.522497	0.928979	1	0.12332	0.370349	-0.0159753
2010-02-07	JSE_TOP40	23569.1	23111.2	23993.9	23111.2	629180000	0.0198	0.0196174	0.0267157		3.11794e-05		0.246043	0.476606	0.761145		0.494598	3	59.4904	-0.494267	0	24.92	-3.38	70.852	0.0194921	0.0326008	3.69	0.1	-0.494267	4.08581	-3.38	0.0326008	0.1	0.0196174	0.494598	0.365982	0.598591	0.553331		0.505968	3	0.505968	0.0326006	0	0	0.522497	-0.039452
2010-02-14	JSE_TOP40	24352.6	23569.1	24602	23567.8	573560000	0.0332	0.0327021	0.0329824		5.7016e-05		0.462613	0.616421	0.79369		0.624241	3	59.4904	-0.494267	0	21.155	-2.71	75.8	0.0726882	0.0510063	3.78	0.09	-0.494267	4.08581	-2.71	0.0510063	0.09	0.0327021	0.624241	0.695657	0.791572	0.634147		0.707125	3	0.707125	0.00115846	0	0	0.505968	0.0196174
2010-02-21	JSE_TOP40	23994.6	24352.6	24729	23845	580360000	-0.0147	-0.0148106	0.0328082		2.55198e-05		0.198602	0.612534	0.789711		0.533616	3	59.4904	-0.494267	0	20.236	-0.52	76.226	-0.00678677	0.0445754	3.61	-0.17	-0.494267	4.08581	-0.52	0.0445754	-0.17	-0.0148106	0.533616	0.293765	0.786208	0.624266		0.56808	3	0.56808	5.5558e-05	0	0	0.707125	0.0327021
2010-02-28	JSE_TOP40	25058.4	23994.6	25062	23994.6	542820000	0.0443	0.0433815	0.0252967		7.99188e-05		0.654592	0.444946	0.811677		0.637072	3	59.4904	-0.494267	0	18.658	-2.08	77.862	0.0365173	0.0310459	3.69	0.08	-0.494267	4.08581	-2.08	0.0310459	0.08	0.0433815	0.637072	0.987897	0.554892	0.678812		0.740533	3	0.740533	1.64834e-05	0	0	0.56808	-0.0148106
2010-03-07	JSE_TOP40	25373.4	25058.4	25380.3	24960.7	603250000	0.0126	0.0124903	0.0256027		2.0705e-05		0.158243	0.451773	0.776318		0.462111	3	44.6213	-0.287603	0	17.984	0.16	79.364	0.00227015	0.0222398	3.71	0.02	-0.287603	3.79821	0.16	0.0222398	0.02	0.0124903	0.462111	0.232329	0.564314	0.591007		0.46255	3	0.46255	4.04263e-06	0	0	0.740533	0.0433815
2010-03-14	JSE_TOP40	25667.6	25373.4	25938.2	25113.5	894150000	0.0116	0.0115285	0.0237964		1.28933e-05		0.0927629	0.411474	0.606104		0.370114	3	44.6213	-0.287603	0	17.238	-0.61	79.054	-0.0128052	0.0486474	3.7	-0.01	-0.287603	3.79821	-0.61	0.0486474	-0.01	0.0115285	0.370114	0.132651	0.508691	0.16833		0.269891	3	0.269891	3.92628e-06	0	0	0.46255	0.0124903
2010-03-21	JSE_TOP40	25663.4	25667.6	25766.7	25352.5	499550000	-0.0002	-0.000164423	0.0186255		3.29143e-07		0	0.296108	0.836995		0.377701	3	44.6213	-0.287603	0	17.388	0.8	78.382	-0.00498882	0.0233134	3.86	0.16	-0.287603	3.79821	0.8	0.0233134	0.16	-0.000164423	0.377701	0	0.349455	0.741683		0.363713	3	0.363713	3.92568e-06	0	0	0.269891	0.0115285
2010-03-28	JSE_TOP40	26113.3	25663.4	26113.3	25660	373360000	0.0175	0.0173805	0.00743737		4.65515e-05	0.27683	0.374897	0.0464937	0.910832	0.805214	0.534359	4	44.6213	-0.287603	0	17.445	-0.3	80.5875	0.0579204	0.0389026	3.96	0.1	-0.287603	3.79821	-0.3	0.0389026	0.1	0.0173805	0.534359	0.56213	0.00491958	0.925037	0.922002	0.603522	4	0.603522	3.97728e-06	0	0	0.363713	-0.000164423
2010-04-04	JSE_TOP40	26368.3	26113.3	26406.2	25931.3	548600000	0.0098	0.00971966	0.00729411		1.77172e-05	0.225988	0.133199	0.0432974	0.808295	0.604242	0.397258	4	55.6117	0.220182	0	16.498	-1.33	83.884	0.00169287	0.0328256	3.9	-0.06	0.220182	4.01839	-1.33	0.0328256	-0.06	0.00971966	0.397258	0.194205	0.000507835	0.670413	0.691228	0.389089	4	0.389089	9.49564e-06	0	0	0.603522	0.0173805
2010-04-11	JSE_TOP40	26058	26368.3	26547.9	25934.4	427900000	-0.0118	-0.0118377	0.0126455		2.76646e-05	0.230948	0.216581	0.162689	0.87892	0.62385	0.47051	4	55.6117	0.220182	0	16.324	2.22	85.234	0.0243478	0.0531143	3.79	-0.11	0.220182	4.01839	2.22	0.0531143	-0.11	-0.0118377	0.47051	0.321134	0.165301	0.84579	0.713744	0.511492	4	0.511492	9.61906e-06	0	0	0.389089	0.00971966
2010-04-18	JSE_TOP40	25906.7	26058	26117	25581.6	500120000	-0.0058	-0.00582512	0.0135197		1.16474e-05	0.222766	0.08232	0.182195	0.836662	0.591508	0.423171	4	55.6117	0.220182	0	16.496	-1.74	84.608	0.0149798	0.0334604	3.84	0.05	0.220182	4.01839	-1.74	0.0334604	0.05	-0.00582512	0.423171	0.116755	0.192224	0.740855	0.676606	0.43161	4	0.43161	9.63097e-06	0	0	0.511492	-0.0118377
2010-04-25	JSE_TOP40	25629.9	25906.7	26308.7	25285.6	463950000	-0.0107	-0.0107408	0.00994363		2.31508e-05	0.238766	0.178745	0.10241	0.857826	0.654754	0.448434	4	55.6117	0.220182	0	20.37	5.43	85.982	0.0011609	0.0330673	3.69	-0.15	0.220182	4.01839	5.43	0.0330673	-0.15	-0.0107408	0.448434	0.263537	0.0820989	0.79341	0.74923	0.472069	4	0.472069	1.00412e-05	0	0	0.43161	-0.00582512
2010-05-02	JSE_TOP40	23598	25629.9	25702	23435	864210000	-0.0793	-0.082598	0.0366584		9.55763e-05	0.126154	0.785838	0.698434	0.623623	0.209613	0.579377	4	64.0069	0.140597	0	28.538	18.9	82.496	-0.119525	0.075694	3.45	-0.24	0.140597	4.15899	18.9	0.075694	-0.24	-0.082598	0.579377	1	0.904773	0.211833	0.238082	0.588672	4	0.588672	2.84107e-05	0	0	0.472069	-0.0107408
2010-05-09	JSE_TOP40	24355.1	23598	25299.9	23598	752570000	0.0321	0.0315772	0.0477035		4.19592e-05	0.0972501	0.336403	0.944855	0.688946	0.0953615	0.516391	4	64.0069	0.140597	0	28.12	-9.71	78.324	-0.000653979	0.0460871	3.44	-0.01	0.140597	4.15899	-9.71	0.0460871	-0.01	0.0315772	0.516391	0.503533	1	0.374045	0.106888	0.496116	4	0.496116	2.9571e-05	0	0	0.588672	-0.082598
2010-05-16	JSE_TOP40	23349.1	24355.1	24641.7	22913.9	704870000	-0.0413	-0.0421816	0.04835		5.98431e-05	0.105758	0.486311	0.95928	0.716857	0.128991	0.57286	4	64.0069	0.140597	0	37.12	8.86	72.172	-0.0814721	0.0680478	3.2	-0.24	0.140597	4.15899	8.86	0.0680478	-0.24	-0.0421816	0.57286	0.731731	1	0.443353	0.145504	0.580147	4	0.580147	2.96394e-05	0	0	0.496116	0.0315772
2010-05-23	JSE_TOP40	24219	23349.1	24589	23073.9	744970000	0.0373	0.0365782	0.0581241	0.082598	4.91002e-05	0.167472	0.396261	0.821782	0.693393	0.372938	0.571093	4	64.0069	0.140597	0	33.94	-8.03	70.79	0.0355562	0.0749779	3.31	0.11	0.140597	4.15899	-8.03	0.0749779	0.11	0.0365782	0.571093	0.594652	0.783311	0.385088	0.425625	0.547169	4	0.547169	2.95669e-05	0	0	0.580147	-0.0421816
2010-05-30	JSE_TOP40	23604.5	24219	24719.7	23475.1	592170000	-0.0254	-0.0256988	0.0398948	0.0623898	4.33977e-05	0.160365	0.348461	0.598106	0.782801	0.344845	0.518553	4	64.0069	0.140597	0	32.6625	3.41	72.705	-0.016018	0.0187546	3.2	-0.11	0.140597	4.15899	3.41	0.0187546	-0.11	-0.0256988	0.518553	0.521888	0.676608	0.607106	0.393366	0.549742	4	0.549742	2.83465e-05	0	0	0.547169	0.0365782
2010-06-06	JSE_TOP40	23888.3	23604.5	24303.8	23052.7	604340000	0.012	0.0119514	0.035716	0.0623898	1.9776e-05	0.151776	0.150456	0.55149	0.77568	0.310895	0.44713	4	54.6336	-0.158342	0	32.672	-6.69	72.762	0.0198463	0.0370714	3.24	0.04	-0.158342	4.00065	-6.69	0.0370714	0.04	0.0119514	0.44713	0.220475	0.614484	0.589423	0.354382	0.444691	4	0.444691	9.02503e-06	0	0	0.549742	-0.0256988
2010-06-13	JSE_TOP40	24754.9	23888.3	25060.5	23888.3	565270000	0.0363	0.0356342	0.0291918	0.0623898	6.30393e-05	0.165204	0.513103	0.478711	0.798541	0.363973	0.538582	4	54.6336	-0.158342	0	25.874	-4.84	76.218	0.0501668	0.0332186	3.24	0	-0.158342	4.00065	-4.84	0.0332186	0	0.0356342	0.538582	0.772515	0.514029	0.646192	0.41533	0.587017	4	0.587017	8.63639e-06	0	0	0.444691	0.0119514
2010-06-20	JSE_TOP40	24263.8	24754.9	25208.8	24220.9	450690000	-0.0198	-0.0200371	0.0287152	0.0623898	4.44587e-05	0.149402	0.357354	0.473394	0.865585	0.301511	0.499461	4	54.6336	-0.158342	0	27.422	4.58	76.642	-0.0109619	0.0444613	3.12	-0.12	-0.158342	4.00065	4.58	0.0444613	-0.12	-0.0200371	0.499461	0.535426	0.506691	0.812677	0.343606	0.5496	4	0.5496	8.62939e-06	0	0	0.587017	0.0356342
2010-06-27	JSE_TOP40	23355.2	24263.8	24456	23014.2	473080000	-0.0374	-0.0381684	0.0328773	0.0623898	8.06807e-05	0.133451	0.660978	0.519823	0.852484	0.238458	0.567936	4	54.6336	-0.158342	0	32.13	1.59	73.858	-0.0603048	0.0556971	3	-0.12	-0.158342	4.00065	1.59	0.0556971	-0.12	-0.0381684	0.567936	0.997618	0.570776	0.780144	0.271204	0.654935	4	0.654935	8.66984e-06	0	0	0.5496	-0.0200371
2010-07-04	JSE_TOP40	24284.9	23355.2	24298.1	23202.9	395800000	0.0398	0.039036	0.0390903	0.0623898	9.86255e-05	0.146492	0.811398	0.589131	0.897702	0.290006	0.647059	4	56.5579	0.034616	0	26.795	-5.14	73.9525	0.0469634	0.0296195	3.07	0.07	0.034616	4.03527	-5.14	0.0296195	0.07	0.039036	0.647059	1	0.666439	0.892432	0.330396	0.722317	4	0.722317	1.06884e-05	0	0	0.654935	-0.0381684
2010-07-11	JSE_TOP40	24465.5	24284.9	24881.8	24035.5	482570000	0.0074	0.00740962	0.0336771	0.0623898	1.53545e-05	0.148438	0.113394	0.528746	0.846931	0.297701	0.446693	4	56.5579	0.034616	0	25.054	1.27	75.7	0.00464346	0.0335204	2.96	-0.11	0.034616	4.03527	1.27	0.0335204	-0.11	0.00740962	0.446693	0.164057	0.583091	0.766355	0.339232	0.463184	4	0.463184	1.07384e-05	0	0	0.722317	0.039036
2010-07-18	JSE_TOP40	25333.3	24465.5	25426.4	24000.6	548580000	0.0355	0.034857	0.0355219	0.0623898	6.35404e-05	0.157975	0.517303	0.549324	0.808306	0.3354	0.552583	4	56.5579	0.034616	0	24.728	-2.78	76.642	0.0225111	0.0272472	3.02	0.06	0.034616	4.03527	-2.78	0.0272472	0.06	0.034857	0.552583	0.778908	0.611495	0.670443	0.382521	0.610842	4	0.610842	1.07355e-05	0	0	0.463184	0.00740962
2010-07-25	JSE_TOP40	25224.6	25333.3	25648	24944.3	524130000	-0.0043	-0.00430082	0.0210547	0.0623898	8.20563e-06	0.141129	0.0534696	0.387938	0.822613	0.268809	0.383207	4	56.5579	0.034616	0	23.56	0.03	77.236	0.00297215	0.0455675	2.94	-0.08	0.034616	4.03527	0.03	0.0455675	-0.08	-0.00430082	0.383207	0.0728371	0.388739	0.705968	0.306055	0.3684	4	0.3684	1.05695e-05	0	0	0.610842	0.034857
2010-08-01	JSE_TOP40	25172.7	25224.6	25799.4	25172.7	591000000	-0.0021	-0.00205924	0.0179845	0.0623898	3.48433e-06	0.16489	0.0138941	0.353689	0.783485	0.36273	0.37845	4	43.8754	-0.253913	0	22.138	-1.76	82.694	0.047622	0.0632199	2.86	-0.08	-0.253913	3.78135	-1.76	0.0632199	-0.08	-0.00205924	0.37845	0.0125933	0.341466	0.608806	0.413904	0.344192	4	0.344192	3.8744e-06	0	0	0.3684	-0.00430082
2010-08-08	JSE_TOP40	24424.3	25172.7	25211.7	24106.2	392040000	-0.0297	-0.0301803	0.0267575	0.0623898	7.69827e-05	0.174426	0.629981	0.451555	0.899902	0.400426	0.595466	4	43.8754	-0.253913	0	24.374	4.5	78.206	-0.0785469	0.0416841	2.68	-0.18	-0.253913	3.78135	4.5	0.0416841	-0.18	-0.0301803	0.595466	0.950432	0.476547	0.897895	0.45719	0.695516	4	0.695516	3.81354e-06	0	0	0.344192	-0.00205924
2010-08-15	JSE_TOP40	23921.2	24424.3	24670.1	23770.9	565960000	-0.0206	-0.020813	0.0134712	0.0623898	3.67747e-05	0.152632	0.292944	0.303342	0.798137	0.314277	0.427175	4	43.8754	-0.253913	0	25.39	-0.75	74.944	-0.0223398	0.0412989	2.62	-0.06	-0.253913	3.78135	-0.75	0.0412989	-0.06	-0.020813	0.427175	0.437378	0.271973	0.645189	0.358266	0.428202	4	0.428202	3.81301e-06	0	0	0.695516	-0.0301803
2010-08-22	JSE_TOP40	23644.5	23921.2	24388.7	23367.5	655120000	-0.0116	-0.0116383	0.0120761	0.0623898	1.77652e-05	0.156414	0.133601	0.287779	0.745967	0.329227	0.374143	4	43.8754	-0.253913	0	26.328	-1.04	72.818	0.0226059	0.0630488	2.66	0.04	-0.253913	3.78135	-1.04	0.0630488	0.04	-0.0116383	0.374143	0.194817	0.250492	0.51564	0.375432	0.334095	4	0.334095	3.81496e-06	0	0	0.428202	-0.020813
2010-08-29	JSE_TOP40	24825.5	23644.5	24990.7	23626.2	561020000	0.0499	0.0487409	0.0356226	0.0623898	8.68791e-05	0.150414	0.712935	0.550448	0.801027	0.30551	0.59248	4	43.8754	-0.253913	0	24.33	-3.14	75.41	-0.00173114	0.0159629	2.72	0.06	-0.253913	3.78135	-3.14	0.0159629	0.06	0.0487409	0.59248	1	0.613047	0.652367	0.348198	0.653403	4	0.653403	4.03093e-06	0	0	0.334095	-0.0116383
2010-09-05	JSE_TOP40	24966.8	24825.5	25111.6	24494.7	483150000	0.0057	0.0056776	0.030854	0.0623898	1.17512e-05	0.142017	0.0831899	0.497252	0.846591	0.272316	0.424838	4	63.9471	0.376703	0	22.9625	0.68	77.1675	0.0329059	0.0251867	2.81	0.09	0.376703	4.15806	0.68	0.0251867	0.09	0.0056776	0.424838	0.118079	0.539622	0.765512	0.310083	0.433324	4	0.433324	2.77885e-05	0	0	0.653403	0.0487409
2010-09-12	JSE_TOP40	25258.3	24966.8	25605.3	24966.8	640020000	0.0117	0.0116087	0.0254204	0.0623898	1.8138e-05	0.135705	0.136726	0.436639	0.754802	0.247369	0.393884	4	63.9471	0.376703	0	21.72	0.02	78.438	-0.00141963	0.0242597	2.75	-0.06	0.376703	4.15806	0.02	0.0242597	-0.06	0.0116087	0.393884	0.199574	0.455959	0.53758	0.281436	0.368637	4	0.368637	2.92855e-05	0	0	0.433324	0.0056776
2010-09-19	JSE_TOP40	25521.1	25258.3	25629.7	25247	429210000	0.0104	0.0103503	0.0199284	0.0623898	2.41149e-05	0.134963	0.186826	0.375374	0.878153	0.244434	0.421197	4	63.9471	0.376703	0	22.388	-0.3	78.378	0.01665	0.0356654	2.62	-0.13	0.376703	4.15806	-0.3	0.0356654	-0.13	0.0103503	0.421197	0.275839	0.371396	0.843887	0.278065	0.442297	4	0.442297	2.95095e-05	0	0	0.368637	0.0116087
2010-09-26	JSE_TOP40	25982	25521.1	26177.5	25500.4	602080000	0.0181	0.0178996	0.00503768	0.0623898	2.97296e-05	0.135276	0.23389	0.212786	0.777002	0.245671	0.367337	4	63.9471	0.376703	0	22.918	0.79	79.82	0.0490744	0.0411111	2.54	-0.08	0.376703	4.15806	0.79	0.0411111	-0.08	0.0178996	0.367337	0.347482	0.176608	0.592707	0.279486	0.349071	4	0.349071	3.16013e-05	0	0	0.442297	0.0103503
2010-10-03	JSE_TOP40	26393.2	25982	26613.3	25888.2	5.3529e+08	0.0158	0.015699	0.00351581	0.0623898	2.9328e-05	0.141349	0.230524	0.212786	0.816083	0.269676	0.382267	4	69.0042	0.0761117	0	21.81	-1.79	83.866	0.0142885	0.0269365	2.41	-0.13	0.0761117	4.23417	-1.79	0.0269365	-0.13	0.015699	0.382267	0.342358	0.176608	0.689753	0.307051	0.378943	4	0.378943	6.48892e-05	0	0	0.349071	0.0178996
2010-10-10	JSE_TOP40	26772.7	26393.2	27217.6	26214.3	607830000	0.0144	0.0142786	0.00317545	0.0623898	2.34911e-05	0.144263	0.181597	0.212786	0.773638	0.281196	0.362304	4	69.0042	0.0761117	0	19.174	-1.68	83.114	-0.0233999	0.0255146	2.59	0.18	0.0761117	4.23417	-1.68	0.0255146	0.18	0.0142786	0.362304	0.267879	0.176608	0.584352	0.320279	0.33728	4	0.33728	6.93347e-05	0	0	0.378943	0.015699
2010-10-17	JSE_TOP40	26763.7	26772.7	27093.7	26543.8	574700000	-0.0003	-0.000335846	0.00828251	0.0547439	5.84385e-07	0.14212	0	0.204221	0.793023	0.272726	0.317492	4	69.0042	0.0761117	0	19.512	-0.25	81.426	-0.0146293	0.0184934	2.59	0	0.0761117	4.23417	-0.25	0.0184934	0	-0.000335846	0.317492	0	0.151709	0.63249	0.310553	0.273688	4	0.273688	7.11789e-05	0	0	0.33728	0.0142786
2010-10-24	JSE_TOP40	27053.7	26763.7	27096.2	26581.8	479070000	0.0108	0.0107754	0.00726113	0.0547439	2.24924e-05	0.134996	0.173226	0.192827	0.848979	0.244567	0.3649	4	69.0042	0.0761117	0	20.572	2.42	82.248	0.0210766	0.0318506	2.63	0.04	0.0761117	4.23417	2.42	0.0318506	0.04	0.0107754	0.3649	0.255136	0.136237	0.77144	0.278219	0.360258	4	0.360258	8.13084e-05	0	0	0.273688	-0.000335846
2010-10-31	JSE_TOP40	28048.9	27053.7	28048.9	26978.3	598570000	0.0368	0.0361267	0.0152722	0.0547439	6.03551e-05	0.187696	0.490603	0.282193	0.779056	0.45288	0.501183	4	69.0042	0.0761117	0	19.948	-2.94	85.596	0.0540481	0.028058	2.58	-0.05	0.0761117	4.23417	-2.94	0.028058	-0.05	0.0361267	0.501183	0.738264	0.259331	0.597807	0.517422	0.528206	4	0.528206	0.000159517	0	0	0.360258	0.0107754
2010-11-07	JSE_TOP40	28253.8	28048.9	28283.4	27744.9	559110000	0.0073	0.00727677	0.0158066	0.0547439	1.30149e-05	0.20443	0.0937826	0.288155	0.802145	0.519026	0.425777	4	79.5157	0.141787	0	19.018	2.35	87.43	-0.0113217	0.024838	2.76	0.18	0.141787	4.37596	2.35	0.024838	0.18	0.00727677	0.425777	0.134204	0.26756	0.655142	0.593376	0.412571	4	0.412571	0.000767463	0	0	0.528206	0.0361267
2010-11-14	JSE_TOP40	27930.3	28253.8	28421.7	27687.7	542010000	-0.0114	-0.0115134	0.0195931	0.0547439	2.1242e-05	0.111211	0.162744	0.330395	0.812151	0.150547	0.363959	4	79.5157	0.141787	0	20.266	-2.57	83.94	-0.0342742	0.0217974	2.88	0.12	0.141787	4.37596	-2.57	0.0217974	0.12	-0.0115134	0.363959	0.239181	0.325863	0.679989	0.170257	0.353822	4	0.353822	0.00105812	0	0	0.412571	0.00727677
2010-11-21	JSE_TOP40	27730.4	27930.3	28217	27359.3	427700000	-0.0072	-0.00718283	0.0215223	0.0547439	1.67941e-05	0.192292	0.125461	0.351915	0.879037	0.471047	0.456865	4	79.5157	0.141787	0	20.195	4.18	83.505	0.019173	0.0279194	2.87	-0.01	0.141787	4.37596	4.18	0.0279194	-0.01	-0.00718283	0.456865	0.182426	0.355567	0.846081	0.538282	0.480589	4	0.480589	0.00108288	0	0	0.353822	-0.0115134
2010-11-28	JSE_TOP40	27933.4	27730.4	28049.3	26831.9	740240000	0.0073	0.0072931	0.00976447	0.0547439	9.85234e-06	0.26129	0.0672729	0.220753	0.696161	0.743787	0.431994	4	79.5157	0.141787	0	20.766	-4.21	88.1	0.0669463	0.0361408	3.03	0.16	0.141787	4.37596	-4.21	0.0361408	0.16	0.0072931	0.431994	0.0938492	0.174527	0.391961	0.851466	0.377951	4	0.377951	0.000846127	0	0	0.480589	-0.00718283
2010-12-05	JSE_TOP40	28050.5	27933.4	28532.7	27927.2	522500000	0.0042	0.00418157	0.00897752	0.0547439	8.003e-06	0.264601	0.0517711	0.211974	0.823567	0.756874	0.461047	4	72.6512	-0.0902847	0	17.722	-0.4	90.248	-0.0123205	0.0150438	3.32	0.29	-0.0902847	4.28567	-0.4	0.0150438	0.29	0.00418157	0.461047	0.0702516	0.16241	0.708337	0.866494	0.451873	4	0.451873	0.000305994	0	0	0.377951	0.0072931
2010-12-12	JSE_TOP40	28215.5	28050.5	28400	28038.5	559170000	0.0059	0.00586573	0.00660506	0.0547439	1.04901e-05	0.245915	0.0726185	0.185509	0.80211	0.683012	0.435812	4	72.6512	-0.0902847	0	17.32	-1.5	90.912	0.0173821	0.0128062	3.33	0.01	-0.0902847	4.28567	-1.5	0.0128062	0.01	0.00586573	0.435812	0.101987	0.136237	0.655055	0.781679	0.418739	4	0.418739	0.000184518	0	0	0.451873	0.00418157
2010-12-19	JSE_TOP40	28582.7	28215.5	28744.2	28177.5	246710000	0.013	0.0129302	0.00379448	0.0547439	5.24104e-05	0.209897	0.424008	0.171547	0.984939	0.540637	0.530283	4	72.6512	-0.0902847	0	16.205	0.36	92.9	0.0272833	0.0202199	3.41	0.08	-0.0902847	4.28567	0.36	0.0202199	0.08	0.0129302	0.530283	0.63689	0.136237	1	0.618192	0.59783	4	0.59783	0.000152343	0	0	0.418739	0.00586573
2010-12-26	JSE_TOP40	28639.4	28582.7	28775.4	28463.1	134150000	0.002	0.00198245	0.00473506	0.0547439	1.47779e-05	0.135629	0.10856	0.171547	1	0.247067	0.381794	4	72.6512	-0.0902847	0	17.548	1.28	93.17	-0.00428129	0.01546	3.3	-0.11	-0.0902847	4.28567	1.28	0.01546	-0.11	0.00198245	0.381794	0.156699	0.136237	1	0.28109	0.393506	4	0.393506	0.000122234	0	0	0.59783	0.0129302
2011-01-02	JSE_TOP40	28415.5	28639.4	28947.2	28222.7	348960000	-0.0078	-0.00784721	0.00866605	0.0547439	2.24874e-05	0.0913826	0.173184	0.2085	0.92511	0.0721681	0.34474	4	55.9192	-0.261762	0	17.31	-0.61	94.722	0.0108813	0.0408378	3.34	0.04	-0.261762	4.02391	-0.61	0.0408378	0.04	-0.00784721	0.34474	0.255073	0.157615	0.96049	0.0802555	0.363358	4	0.363358	1.25596e-05	0	0	0.393506	0.00198245
2011-01-09	JSE_TOP40	29227	28415.5	29284.2	28194.3	543140000	0.0286	0.0281554	0.0154413	0.0547439	5.18382e-05	0.135849	0.419212	0.284079	0.81149	0.247935	0.440679	4	55.9192	-0.261762	0	16.504	-1.68	97.086	0.0375871	0.0228668	3.35	0.01	-0.261762	4.02391	-1.68	0.0228668	0.01	0.0281554	0.440679	0.629588	0.261935	0.678347	0.282086	0.462989	4	0.462989	1.00271e-05	0	0	0.363358	-0.00784721
2011-01-16	JSE_TOP40	28808.7	29227	29354.7	28415.8	542400000	-0.0143	-0.0144128	0.0187123	0.0547439	2.65722e-05	0.177049	0.207424	0.320568	0.811923	0.410794	0.437677	4	55.9192	-0.261762	0	17.41	3.01	97.34	-0.0104778	0.023642	3.44	0.09	-0.261762	4.02391	3.01	0.023642	0.09	-0.0144128	0.437677	0.307194	0.3123	0.679422	0.469095	0.442003	4	0.442003	9.98547e-06	0	0	0.462989	0.0281554
2011-01-23	JSE_TOP40	28232.1	28808.7	28932.1	28208.3	621050000	-0.02	-0.0202192	0.0217528	0.0547439	3.25565e-05	0.243072	0.257586	0.354487	0.765902	0.671773	0.512437	4	55.9192	-0.261762	0	17.614	1.57	96.62	0.00226921	0.0106435	3.36	-0.08	-0.261762	4.02391	1.57	0.0106435	-0.08	-0.0202192	0.512437	0.383554	0.359116	0.565144	0.768773	0.519147	4	0.519147	1.07138e-05	0	0	0.442003	-0.0144128
2011-01-30	JSE_TOP40	29719	28232.1	29874.5	27873.2	644990000	0.0527	0.0513256	0.0343547	0.054316	7.95758e-05	0.161487	0.651717	0.492756	0.751894	0.349281	0.561412	4	55.9192	-0.261762	0	17.416	-4.11	100.358	0.0241245	0.0344251	3.68	0.32	-0.261762	4.02391	-4.11	0.0344251	0.32	0.0513256	0.561412	0.98352	0.550892	0.530359	0.39846	0.615808	4	0.615808	4.23116e-05	0	0	0.519147	-0.0202192
2011-02-06	JSE_TOP40	29813.4	29719	29942	29150	752860000	0.0032	0.00317374	0.0324667	0.054316	4.21557e-06	0.159919	0.0200237	0.471695	0.688777	0.343081	0.380894	4	71.9399	0.251923	0	15.948	-0.24	99.904	0.00501606	0.0136192	3.64	-0.04	0.251923	4.27583	-0.24	0.0136192	-0.04	0.00317374	0.380894	0.021924	0.521822	0.373624	0.391341	0.327178	4	0.327178	0.00141051	0	0	0.615808	0.0513256
2011-02-13	JSE_TOP40	29292.8	29813.4	30195.8	29224.5	575330000	-0.0175	-0.0176155	0.0331365	0.054316	3.06181e-05	0.2061	0.241338	0.479168	0.792654	0.525627	0.509697	4	71.9399	0.251923	0	16.412	0.74	102.806	0.0224617	0.0349963	3.59	-0.05	0.251923	4.27583	0.74	0.0349963	-0.05	-0.0176155	0.509697	0.35882	0.532136	0.631575	0.600956	0.530872	4	0.530872	0.00781028	0	0	0.327178	0.00317374
2011-02-20	JSE_TOP40	28803.8	29292.8	29645.8	28202.2	583110000	-0.0167	-0.0168365	0.0323403	0.054316	2.88736e-05	0.208492	0.226715	0.470286	0.788102	0.535085	0.505047	4	71.9399	0.251923	0	20.8675	2.79	110.493	0.0868238	0.0673529	3.42	-0.17	0.251923	4.27583	2.79	0.0673529	-0.17	-0.0168365	0.505047	0.33656	0.519876	0.62027	0.611817	0.522131	4	0.522131	0.0397493	0	0	0.530872	-0.0176155
2011-02-27	JSE_TOP40	29178.1	28803.8	29367.7	28536.4	585980000	0.013	0.0129121	0.0151244	0.054316	2.20351e-05	0.202176	0.169393	0.278237	0.786423	0.510117	0.436042	4	71.9399	0.251923	0	19.544	-0.16	114.526	0.0373316	0.040916	3.49	0.07	0.251923	4.27583	-0.16	0.040916	0.07	0.0129121	0.436042	0.249301	0.254797	0.6161	0.583146	0.425836	4	0.425836	0.199575	0	0	0.522131	-0.0168365
2011-03-06	JSE_TOP40	28070.7	29178.1	29319.1	27383.7	722620000	-0.038	-0.0386942	0.0212187	0.0544913	5.35471e-05	0.197301	0.433536	0.347166	0.706471	0.490847	0.494505	4	124.378	0.547494	0	20.532	1.02	114.446	-0.0142748	0.0466255	3.4	-0.09	0.547494	4.82333	1.02	0.0466255	-0.09	-0.0386942	0.494505	0.651394	0.349559	0.417563	0.561018	0.494884	4	0.494884	0.999437	1	0.547494	0.425836	0.0129121
2011-03-13	JSE_TOP40	27612.9	28070.7	28070.7	26861.1	721540000	-0.0163	-0.0164415	0.0211796	0.0544913	2.27867e-05	0.216313	0.175692	0.34673	0.707103	0.566	0.448881	4	124.378	0.547494	0	25.132	4.36	112.666	0.000525855	0.0344596	3.28	-0.12	0.547494	4.82333	4.36	0.0344596	-0.12	-0.0164415	0.448881	0.258891	0.348957	0.419132	0.647315	0.418574	4	0.418574	0.999999	1	0.547494	0.494884	-0.0386942
2011-03-20	JSE_TOP40	28492.5	27612.9	28691.1	27612.9	406230000	0.0319	0.0313592	0.0310278	0.0544913	7.71958e-05	0.146063	0.631767	0.45659	0.891599	0.288312	0.567067	4	124.378	0.547494	0	19.18	-6.53	115.412	0.0114994	0.00948604	3.46	0.18	0.547494	4.82333	-6.53	0.00948604	0.18	0.0313592	0.567067	0.953151	0.500593	0.877277	0.32845	0.664868	4	0.664868	0.999999	1	0.547494	0.418574	-0.0164415
2011-03-27	JSE_TOP40	29175.6	28492.5	29200.8	28150.4	560060000	0.024	0.0236887	0.0332271	0.0544913	4.22968e-05	0.179435	0.339232	0.481124	0.801589	0.420228	0.510543	4	124.378	0.547494	0	18.09	-0.51	116.49	0.0271719	0.0206434	3.46	0	0.547494	4.82333	-0.51	0.0206434	0	0.0236887	0.510543	0.50784	0.534456	0.653762	0.479928	0.543996	4	0.543996	0.999336	1	0.547494	0.664868	0.0313592
2011-04-03	JSE_TOP40	29561.1	29175.6	29677.1	29123.5	540240000	0.0132	0.0131273	0.0209612	0.0544913	2.42989e-05	0.160152	0.188369	0.344293	0.813186	0.344005	0.422463	4	63.0888	-0.678782	0	17.326	0.47	123.03	0.0626506	0.0377327	3.59	0.13	-0.678782	4.14454	0.47	0.0377327	0.13	0.0131273	0.422463	0.278188	0.345593	0.682561	0.392402	0.424686	4	0.424686	0.0557848	0	0	0.543996	0.0236887
2011-04-10	JSE_TOP40	29003.7	29561.1	29672.9	28880.9	5.2531e+08	-0.0189	-0.0190356	0.0221778	0.0544913	3.62368e-05	0.150637	0.288436	0.357865	0.821922	0.306391	0.443654	4	63.0888	-0.678782	0	16.438	-2.55	123.572	-0.0133107	0.0455658	3.43	-0.16	-0.678782	4.14454	-2.55	0.0455658	-0.16	-0.0190356	0.443654	0.430515	0.364325	0.704254	0.34921	0.462076	4	0.462076	0.00313942	0	0	0.424686	0.0131273
2011-04-17	JSE_TOP40	29457.2	29003.7	29564.6	28163.4	415200000	0.0156	0.0155143	0.0187918	0.0544913	3.73658e-05	0.142661	0.297899	0.320093	0.886351	0.274865	0.444802	4	63.0888	-0.678782	0	15.6375	-0.63	122.735	-0.00797523	0.0341219	3.42	-0.01	-0.678782	4.14454	-0.63	0.0341219	-0.01	0.0155143	0.444802	0.444921	0.31219	0.864243	0.313009	0.483591	4	0.483591	0.000202449	0	0	0.462076	-0.0190356
2011-04-24	JSE_TOP40	29564.3	29457.2	29570.3	29057.7	192380000	0.0036	0.00362953	0.0157559	0.0544913	1.88665e-05	0.135292	0.142832	0.286227	1	0.245737	0.418699	4	63.0888	-0.678782	0	15.222	0.06	125.36	0.0235794	0.0153519	3.32	-0.1	-0.678782	4.14454	0.06	0.0153519	-0.1	0.00362953	0.418699	0.208869	0.265447	1	0.279562	0.43847	4	0.43847	4.53395e-05	0	0	0.483591	0.0155143
2011-05-01	JSE_TOP40	28626.9	29564.3	29599.4	28042.7	414690000	-0.0317	-0.0322214	0.0215764	0.0396814	7.77001e-05	0.14273	0.635994	0.271278	0.886649	0.275138	0.517265	4	73.6942	0.155381	0	17.274	3.65	119.564	-0.107478	0.0887907	3.19	-0.13	0.155381	4.29992	3.65	0.0887907	-0.13	-0.0322214	0.517265	0.959586	0.276868	0.864984	0.313323	0.60369	4	0.60369	0.000157711	0	0	0.43847	0.00362953
2011-05-08	JSE_TOP40	28722.9	28626.9	29155.5	28267.9	585400000	0.0034	0.00334893	0.020653	0.0396814	5.72075e-06	0.136852	0.0326405	0.260977	0.786762	0.251902	0.33307	4	73.6942	0.155381	0	16.624	-1.33	114.528	-0.00537991	0.0505278	3.18	-0.01	0.155381	4.29992	-1.33	0.0505278	-0.01	0.00334893	0.33307	0.0411301	0.26265	0.616943	0.286642	0.301841	4	0.301841	0.000186538	0	0	0.60369	-0.0322214
2011-05-15	JSE_TOP40	28552.5	28722.9	29049.6	28435.2	390390000	-0.0059	-0.00595162	0.0168795	0.0363614	1.52453e-05	0.113763	0.112478	0.200975	0.900868	0.160635	0.343739	4	73.6942	0.155381	0	16.994	0.36	112.02	-0.0163156	0.0517775	3.15	-0.03	0.155381	4.29992	0.36	0.0517775	-0.03	-0.00595162	0.343739	0.162664	0.187018	0.900292	0.18184	0.357953	4	0.357953	0.000191865	0	0	0.301841	0.00334893
2011-05-22	JSE_TOP40	29141.2	28552.5	29141.2	27963.7	449560000	0.0206	0.0204106	0.0219811	0.0363614	4.54012e-05	0.120863	0.365255	0.257885	0.866246	0.1887	0.419522	4	73.6942	0.155381	0	17.046	-1.45	113.406	0.031847	0.0298044	3.07	-0.08	0.155381	4.29992	-1.45	0.0298044	-0.08	0.0204106	0.419522	0.547453	0.265569	0.814318	0.214067	0.460352	4	0.460352	0.000184789	0	0	0.357953	-0.00595162
2011-05-29	JSE_TOP40	28258.3	29141.2	29403.7	28059.5	512070000	-0.0303	-0.0307668	0.0213529	0.0363614	6.00832e-05	0.113982	0.488324	0.250877	0.829669	0.161498	0.432592	4	73.6942	0.155381	0	17.4475	1.97	115.68	0.0020875	0.0280457	2.99	-0.08	0.155381	4.29992	1.97	0.0280457	-0.08	-0.0307668	0.432592	0.734795	0.255896	0.723491	0.182832	0.474254	4	0.474254	0.000150569	0	0	0.460352	0.0204106
2011-06-05	JSE_TOP40	27809.9	28258.3	28546.4	27757.9	508280000	-0.0159	-0.0159944	0.0215528	0.0363614	3.14678e-05	0.112352	0.24846	0.253107	0.831887	0.155058	0.372128	4	58.5139	-0.23066	0	18.396	0.91	117.726	0.0309691	0.0264569	2.99	0	-0.23066	4.06926	0.91	0.0264569	0	-0.0159944	0.372128	0.369662	0.258974	0.728998	0.175437	0.383268	4	0.383268	1.79291e-05	0	0	0.474254	-0.0307668
2011-06-12	JSE_TOP40	27324.3	27809.9	28113.9	27136.6	607060000	-0.0175	-0.0176142	0.0219548	0.0363614	2.90156e-05	0.100383	0.227905	0.257592	0.774088	0.107746	0.341833	4	58.5139	-0.23066	0	20.754	2.99	116.788	-0.0427684	0.0512775	2.94	-0.05	-0.23066	4.06926	2.99	0.0512775	-0.05	-0.0176142	0.341833	0.338372	0.265164	0.585471	0.121109	0.327529	4	0.327529	1.37978e-05	0	0	0.383268	-0.0159944
2011-06-19	JSE_TOP40	27391.9	27324.3	27653.4	26991.7	547050000	0.0025	0.0024691	0.0136708	0.0363614	4.51349e-06	0.0925476	0.0225209	0.165181	0.809202	0.0767731	0.268419	4	58.5139	-0.23066	0	19.552	-0.75	110.176	-0.0819568	0.0612224	2.88	-0.06	-0.23066	4.06926	-0.75	0.0612224	-0.06	0.0024691	0.268419	0.0257254	0.137612	0.672666	0.0855433	0.230387	4	0.230387	1.36598e-05	0	0	0.327529	-0.0176142
2011-06-26	JSE_TOP40	28578.6	27391.9	28659.8	27314.3	5.1292e+08	0.0433	0.0424098	0.0279226	0.0338942	8.26831e-05	0.0855058	0.677763	0.310857	0.829172	0.048938	0.466683	4	58.5139	-0.23066	0	17.878	-5.23	109.032	0.0468843	0.048792	3.22	0.34	-0.23066	4.06926	-5.23	0.048792	0.34	0.0424098	0.466683	1	0.344024	0.722256	0.0535806	0.529965	4	0.529965	1.33553e-05	0	0	0.230387	0.0024691
2011-07-03	JSE_TOP40	28623	28578.6	29024.2	28511.5	428920000	0.0016	0.00155415	0.0252305	0.0338942	3.62341e-06	0.0710851	0.01506	0.280825	0.878323	0	0.293552	4	41.8878	-0.33427	0	16.075	0.08	115.39	0.0667442	0.0452224	3.03	-0.19	-0.33427	3.73499	0.08	0.0452224	-0.19	0.00155415	0.293552	0.014368	0.302573	0.844308	0	0.290312	4	0.290312	3.7068e-06	0	0	0.529965	0.0424098
2011-07-10	JSE_TOP40	28915.9	28623	29073.3	28012.1	520340000	0.0102	0.0101817	0.0192307	0.0338942	1.95674e-05	0.140569	0.148708	0.213896	0.82483	0.266594	0.363507	4	41.8878	-0.33427	0	19.7	3.58	117.722	0.00560606	0.0142994	2.94	-0.09	-0.33427	3.73499	3.58	0.0142994	-0.09	0.0101817	0.363507	0.217814	0.210193	0.711475	0.303512	0.360748	4	0.360748	3.6234e-06	0	0	0.290312	0.00155415
2011-07-17	JSE_TOP40	28664.5	28915.9	28963.7	28272.8	529740000	-0.0087	-0.00873253	0.0221009	0.0338942	1.64846e-05	0.1361	0.122866	0.245913	0.81933	0.248931	0.35926	4	41.8878	-0.33427	0	18.866	-2.01	118.198	0.00784649	0.0147817	2.99	0.05	-0.33427	3.73499	-2.01	0.0147817	0.05	-0.00873253	0.35926	0.178476	0.254385	0.697817	0.28323	0.353477	4	0.353477	3.62268e-06	0	0	0.360748	0.0101817
2011-07-24	JSE_TOP40	27857.9	28664.5	28851.4	27628.5	464100000	-0.0281	-0.0285432	0.0166731	0.0338942	6.15022e-05	0.151861	0.500218	0.185366	0.857738	0.31123	0.463638	4	41.8878	-0.33427	0	22.31	7.73	117.698	-0.0260529	0.0201185	2.82	-0.17	-0.33427	3.73499	7.73	0.0201185	-0.17	-0.0285432	0.463638	0.752901	0.170813	0.793192	0.354767	0.517918	4	0.517918	3.62267e-06	0	0	0.353477	-0.00873253
2011-07-31	JSE_TOP40	25993.9	27857.9	28138.9	25374	790340000	-0.0669	-0.0692535	0.0340097	0.0467231	8.7625e-05	0.0752223	0.719188	0.447955	0.666846	0.00828889	0.460569	4	41.8878	-0.33427	0	27.098	6.75	112.654	-0.0809057	0.0482662	2.58	-0.24	-0.33427	3.73499	6.75	0.0482662	-0.24	-0.0692535	0.460569	1	0.505488	0.319166	0.00690386	0.457889	4	0.457889	3.62233e-06	0	0	0.517918	-0.0285432
2011-08-07	JSE_TOP40	26626.3	25993.9	26901.3	25092.9	815660000	0.0243	0.0240349	0.0390016	0.0467231	2.94668e-05	0.12427	0.231687	0.503641	0.652031	0.202167	0.397382	4	40.4325	-0.035361	0	40.282	4.36	105.304	0.0116232	0.0530253	2.24	-0.34	-0.035361	3.69963	4.36	0.0530253	-0.34	0.0240349	0.397382	0.34413	0.58235	0.282376	0.229532	0.359597	4	0.359597	3.58352e-06	0	0	0.457889	-0.0692535
2011-08-14	JSE_TOP40	26145.3	26626.3	27079.5	25494.6	613290000	-0.0181	-0.0182296	0.0383195	0.0467231	2.97243e-05	0.133421	0.233846	0.496032	0.770443	0.238338	0.434665	4	40.4325	-0.035361	0	36.404	6.69	109.536	0.0110326	0.034138	2.07	-0.17	-0.035361	3.69963	6.69	0.034138	-0.17	-0.0182296	0.434665	0.347416	0.571848	0.576419	0.271066	0.441687	4	0.441687	3.58319e-06	0	0	0.359597	0.0240349
2011-08-21	JSE_TOP40	26200.7	26145.3	26743.3	25730.2	565780000	0.0021	0.0021186	0.0398756	0.0467231	3.74456e-06	0.152764	0.0160755	0.513391	0.798242	0.314799	0.410627	4	40.4325	-0.035361	0	37.992	-7.46	111.058	0.0263482	0.020626	2.19	0.12	-0.035361	3.69963	-7.46	0.020626	0.12	0.0021186	0.410627	0.0159139	0.593885	0.645451	0.358865	0.403529	4	0.403529	3.58322e-06	0	0	0.441687	-0.0182296
2011-08-28	JSE_TOP40	27179.7	26200.7	27887.4	26200.7	628950000	0.0374	0.0366842	0.0242401	0.0467231	5.83261e-05	0.178696	0.473595	0.338972	0.76128	0.417304	0.497788	4	40.4325	-0.035361	0	32.506	-1.67	116.105	0.0318155	0.0302859	2.02	-0.17	-0.035361	3.69963	-1.67	0.0302859	-0.17	0.0366842	0.497788	0.712374	0.355062	0.553665	0.47657	0.524418	4	0.524418	3.58704e-06	0	0	0.403529	0.0021186
2011-09-04	JSE_TOP40	27114.2	27179.7	27624.8	26069.2	677920000	-0.0024	-0.00241464	0.0231368	0.0467231	3.56183e-06	0.180467	0.0145438	0.326664	0.732626	0.424304	0.374535	4	45.2503	0.112576	0	35.805	4.6	115.97	-0.00709898	0.0499028	1.93	-0.09	0.112576	3.81221	4.6	0.0499028	-0.09	-0.00241464	0.374535	0.0135823	0.338075	0.482512	0.484608	0.329694	4	0.329694	4.03349e-06	0	0	0.524418	0.0366842
2011-09-11	JSE_TOP40	27726.2	27114.2	27937.4	26161.2	805490000	0.0226	0.0223217	0.0181897	0.0467231	2.77119e-05	0.196071	0.216978	0.271478	0.657981	0.485985	0.408106	4	45.2503	0.112576	0	34.61	-7.54	114.98	0.0100277	0.0334684	2.08	0.15	0.112576	3.81221	-7.54	0.0334684	0.15	0.0223217	0.408106	0.321738	0.261902	0.297153	0.555436	0.359057	4	0.359057	4.03778e-06	0	0	0.329694	-0.00241464
2011-09-18	JSE_TOP40	26834.4	27726.2	28329.4	26503.7	584930000	-0.0322	-0.0326943	0.0304191	0.0468807	5.58943e-05	0.154665	0.453211	0.408751	0.787037	0.322312	0.492828	4	45.2503	0.112576	0	37.102	10.27	111.984	-0.0629228	0.0555365	1.84	-0.24	0.112576	3.81221	10.27	0.0555365	-0.24	-0.0326943	0.492828	0.681345	0.451035	0.617626	0.367492	0.529375	4	0.529375	4.03791e-06	0	0	0.359057	0.0223217
2011-09-25	JSE_TOP40	26375.8	26834.4	27655.6	26046.1	667190000	-0.0171	-0.0172366	0.0234147	0.0468807	2.58346e-05	0.222487	0.201241	0.330614	0.738905	0.590403	0.465291	4	45.2503	0.112576	0	39.922	1.71	107.692	-0.0349539	0.0295727	1.92	0.08	0.112576	3.81221	1.71	0.0295727	0.08	-0.0172366	0.465291	0.297783	0.343186	0.498102	0.675337	0.453602	4	0.453602	4.04688e-06	0	0	0.529375	-0.0326943
2011-10-02	JSE_TOP40	27001.5	26375.8	27255.7	25624.4	613300000	0.0237	0.0234433	0.0283403	0.0468807	3.82248e-05	0.227218	0.3051	0.385561	0.770437	0.609104	0.517551	4	48.7039	0.0735491	0	39.31	-6.76	104.032	0.0107558	0.037562	2.1	0.18	0.0735491	3.88576	-6.76	0.037562	0.18	0.0234433	0.517551	0.455881	0.419027	0.576404	0.696812	0.537031	4	0.537031	4.97941e-06	0	0	0.453602	-0.0172366
2011-10-09	JSE_TOP40	27839.8	27001.5	28023.8	27000.4	496860000	0.031	0.0305743	0.0308016	0.0468807	6.1535e-05	0.212492	0.500493	0.413017	0.838569	0.550894	0.575744	4	48.7039	0.0735491	0	31.216	-7.96	111.586	0.0703808	0.0431393	2.26	0.16	0.0735491	3.88576	-7.96	0.0431393	0.16	0.0305743	0.575744	0.75332	0.456924	0.745592	0.62997	0.646451	4	0.646451	4.99044e-06	0	0	0.537031	0.0234433
2011-10-16	JSE_TOP40	28165.6	27839.8	28168.8	27376.9	545570000	0.0117	0.0116365	0.021062	0.0468807	2.13291e-05	0.184101	0.163475	0.304369	0.810068	0.438671	0.429146	4	48.7039	0.0735491	0	33.098	3.08	111.472	-0.024168	0.0374019	2.23	-0.03	0.0735491	3.88576	3.08	0.0374019	-0.03	0.0116365	0.429146	0.240293	0.30696	0.674816	0.501106	0.430794	4	0.430794	4.9906e-06	0	0	0.646451	0.0305743
2011-10-23	JSE_TOP40	29566.8	28165.6	29566.8	28097.3	613180000	0.0497	0.0485504	0.0154516	0.0468807	7.9178e-05	0.174753	0.648383	0.241784	0.770507	0.401718	0.515598	4	48.7039	0.0735491	0	28.266	-6.79	111.334	-0.0143498	0.0324601	2.34	0.11	0.0735491	3.88576	-6.79	0.0324601	0.11	0.0485504	0.515598	0.978445	0.220575	0.576579	0.458673	0.558568	4	0.558568	4.9933e-06	0	0	0.430794	0.0116365
2011-10-30	JSE_TOP40	28553.6	29566.8	29566.8	28217.8	608470000	-0.0343	-0.0348691	0.0358804	0.0476056	5.73062e-05	0.245223	0.465046	0.473583	0.773263	0.680276	0.598042	4	48.7039	0.0735491	0	31.626	5.63	109.84	0.01989	0.0426039	2.06	-0.28	0.0735491	3.88576	5.63	0.0426039	-0.28	-0.0348691	0.598042	0.69936	0.538952	0.583422	0.778537	0.650068	4	0.650068	5.22102e-06	0	0	0.558568	0.0485504
2011-11-06	JSE_TOP40	28888.5	28553.6	29490.3	28390	396370000	0.0117	0.0116606	0.0341688	0.0476056	2.94184e-05	0.250527	0.231282	0.45449	0.897369	0.701244	0.571096	4	63.0422	0.258045	0	31.268	-0.12	114.68	0.0195021	0.0308633	2.04	-0.02	0.258045	4.1438	-0.12	0.0308633	-0.02	0.0116606	0.571096	0.343512	0.512598	0.891603	0.802614	0.637582	4	0.637582	2.4467e-05	0	0	0.650068	-0.0348691
2011-11-13	JSE_TOP40	28431.4	28888.5	29477.1	28375.1	416920000	-0.0158	-0.0159491	0.0362458	0.0476056	3.82545e-05	0.238385	0.305349	0.47766	0.885344	0.653245	0.580399	4	63.0422	0.258045	0	32.474	1.96	110.69	-0.0595001	0.032504	2.01	-0.03	0.258045	4.1438	1.96	0.032504	-0.03	-0.0159491	0.580399	0.456261	0.544579	0.861744	0.747497	0.65252	4	0.65252	2.55307e-05	0	0	0.637582	0.0116606
2011-11-20	JSE_TOP40	27770.9	28431.4	28438.2	27428.2	479370000	-0.0232	-0.0235054	0.0198077	0.0476056	4.9034e-05	0.216992	0.395706	0.294287	0.848803	0.568685	0.52687	4	63.0422	0.258045	0	33.3325	2.47	106.665	-0.0162696	0.0265177	1.97	-0.04	0.258045	4.1438	2.47	0.0265177	-0.04	-0.0235054	0.52687	0.593808	0.291476	0.771005	0.650398	0.576672	4	0.576672	2.55279e-05	0	0	0.65252	-0.0159491
2011-11-27	JSE_TOP40	29187.8	27770.9	29501.4	27770.9	600830000	0.051	0.0497628	0.0331588	0.0476056	8.28234e-05	0.249522	0.678939	0.443223	0.777734	0.697269	0.649291	4	63.0422	0.258045	0	29.1	-6.95	110.054	0.0325526	0.041788	2.05	0.08	0.258045	4.1438	-6.95	0.041788	0.08	0.0497628	0.649291	1	0.497047	0.594523	0.79805	0.722405	4	0.722405	2.44123e-05	0	0	0.576672	-0.0235054
2011-12-04	JSE_TOP40	29169.6	29187.8	29591	28896.9	495710000	-0.0006	-0.000624428	0.0329654	0.0476056	1.25966e-06	0.256206	0	0.441066	0.839242	0.72369	0.501	4	45.2549	-0.331494	0	28.322	-1.14	109.31	-0.0154486	0.0179579	2.07	0.02	-0.331494	3.81231	-1.14	0.0179579	0.02	-0.000624428	0.501	0	0.494069	0.747263	0.828389	0.51743	4	0.51743	4.23466e-06	0	0	0.722405	0.0497628
2011-12-11	JSE_TOP40	28556.6	29169.6	29214.2	28044.9	775470000	-0.021	-0.0212383	0.0340366	0.0476056	2.73876e-05	0.226773	0.214259	0.453015	0.675547	0.607347	0.487542	4	45.2549	-0.331494	0	25.304	-2.09	106.262	-0.0369066	0.0375268	1.86	-0.21	-0.331494	3.81231	-2.09	0.0375268	-0.21	-0.0212383	0.487542	0.317599	0.510562	0.340772	0.694794	0.465932	4	0.465932	4.0406e-06	0	0	0.51743	-0.000624428
2011-12-18	JSE_TOP40	28641.1	28556.6	28696.1	28063.4	437270000	0.003	0.00295397	0.0299918	0.0476056	6.75547e-06	0.215599	0.0413139	0.407894	0.873437	0.563177	0.471455	4	45.2549	-0.331494	0	22.292	-3.56	107.722	0.0495225	0.0325195	2.03	0.17	-0.331494	3.81231	-3.56	0.0325195	0.17	0.00295397	0.471455	0.0543331	0.448283	0.832176	0.644074	0.494716	4	0.494716	4.03949e-06	0	0	0.465932	-0.0212383
2011-12-25	JSE_TOP40	28469.8	28641.1	28763.7	28266.7	175720000	-0.006	-0.00599887	0.0106625	0.0476056	3.41388e-05	0.248334	0.27085	0.19227	1	0.692574	0.538923	4	45.2549	-0.331494	0	22.87	2.67	107.507	-0.0109492	0.0204697	1.89	-0.14	-0.331494	3.81231	2.67	0.0204697	-0.14	-0.00599887	0.538923	0.403744	0.150664	1	0.792658	0.586767	4	0.586767	4.11826e-06	0	0	0.494716	0.00295397
2012-01-01	JSE_TOP40	29209.6	28469.8	29492.2	28466.3	321720000	0.026	0.0256532	0.0196078	0.0476056	7.97376e-05	0.265584	0.653074	0.292057	0.941048	0.760762	0.661735	4	57.8409	0.245385	0	21.825	-2.77	112.51	0.0351775	0.0371328	1.98	0.09	0.245385	4.0577	-2.77	0.0371328	0.09	0.0256532	0.661735	0.985585	0.288397	1	0.870958	0.786235	4	0.786235	1.23099e-05	0	0	0.586767	-0.00599887
2012-01-08	JSE_TOP40	29333.6	29209.6	29618.6	29084	468960000	0.0042	0.00423517	0.0134238	0.0476056	9.03099e-06	0.277467	0.060388	0.223072	0.854894	0.807734	0.486522	4	57.8409	0.245385	0	20.838	0.28	111.776	-0.0187528	0.0397069	1.89	-0.09	0.245385	4.0577	0.28	0.0397069	-0.09	0.00423517	0.486522	0.0833687	0.19318	0.78613	0.924895	0.496893	4	0.496893	1.25455e-05	0	0	0.786235	0.0256532
2012-01-15	JSE_TOP40	30116.4	29333.6	30138.1	29278.3	574910000	0.0267	0.0263373	0.0160725	0.0476056	4.58111e-05	0.294074	0.368691	0.25262	0.7929	0.873376	0.571897	4	57.8409	0.245385	0	20.31	-2.63	109.6	-0.0126387	0.0133839	2.05	0.16	0.245385	4.0577	-2.63	0.0133839	0.16	0.0263373	0.571897	0.552683	0.233964	0.632185	1	0.604708	4	0.604708	1.25539e-05	0	0	0.496893	0.00423517
2012-01-22	JSE_TOP40	30324.3	30116.4	30528.2	29920.9	563530000	0.0069	0.00687884	0.0118526	0.0476056	1.22067e-05	0.282171	0.0870078	0.205545	0.799559	0.826327	0.47961	4	57.8409	0.245385	0	18.598	0.25	109.18	0.0182653	0.0193515	1.93	-0.12	0.245385	4.0577	0.25	0.0193515	-0.12	0.00687884	0.47961	0.123891	0.168987	0.64872	0.946245	0.471961	4	0.471961	1.26092e-05	0	0	0.604708	0.0263373
2012-01-29	JSE_TOP40	30718.5	30324.3	30834.9	29872.7	643950000	0.013	0.012916	0.00985756	0.0476056	2.00575e-05	0.264173	0.152816	0.18329	0.752503	0.755184	0.460948	4	57.8409	0.245385	0	18.494	-1.43	111.196	0.0184709	0.0229161	1.97	0.04	0.245385	4.0577	-1.43	0.0229161	0.04	0.012916	0.460948	0.224067	0.13827	0.53187	0.864553	0.43969	4	0.43969	1.45293e-05	0	0	0.471961	0.00687884
2012-02-05	JSE_TOP40	30210.4	30718.5	30790.8	30150.3	536130000	-0.0165	-0.0166772	0.0179724	0.0476056	3.11066e-05	0.291855	0.245433	0.273814	0.815591	0.864606	0.549861	4	70.4941	0.197834	0	18.598	3.69	117.208	0.0482993	0.0302431	1.96	-0.01	0.197834	4.25553	3.69	0.0302431	-0.01	-0.0166772	0.549861	0.365054	0.263217	0.688532	0.990201	0.576751	4	0.576751	8.13151e-05	0	0	0.43969	0.012916
2012-02-12	JSE_TOP40	30373.2	30210.4	30637.2	30005.8	467360000	0.0054	0.00537143	0.01295	0.0476056	1.14931e-05	0.295836	0.0810266	0.217787	0.855831	0.88034	0.508746	4	70.4941	0.197834	0	19.344	-3.01	119.794	0.0214396	0.0187447	2.01	0.05	0.197834	4.25553	-3.01	0.0187447	0.05	0.00537143	0.508746	0.114786	0.185885	0.788455	1	0.522281	4	0.522281	9.32294e-05	0	0	0.576751	-0.0166772
2012-02-19	JSE_TOP40	30560.1	30373.2	30582.3	30255.9	5.228e+08	0.0062	0.00613591	0.0128641	0.0476056	1.17366e-05	0.29604	0.0830676	0.216829	0.823391	0.88115	0.501109	4	70.4941	0.197834	0	17.6225	-0.47	123.335	0.0342081	0.0219209	1.98	-0.03	0.197834	4.25553	-0.47	0.0219209	-0.03	0.00613591	0.501109	0.117893	0.184562	0.707901	1	0.502589	4	0.502589	0.000102564	0	0	0.522281	0.00537143
2012-02-26	JSE_TOP40	30406.8	30560.1	30639.7	30098.8	509330000	-0.005	-0.00502733	0.0107068	0.0476056	9.87047e-06	0.285766	0.0674248	0.192764	0.831273	0.840535	0.482999	4	70.4941	0.197834	0	17.826	-0.02	124.88	0.00829285	0.0394897	1.99	0.01	0.197834	4.25553	-0.02	0.0394897	0.01	-0.00502733	0.482999	0.0940805	0.151346	0.727473	0.96256	0.483865	4	0.483865	0.000150287	0	0	0.502589	0.00613591
2012-03-04	JSE_TOP40	30100.6	30406.8	30406.8	29539.6	485110000	-0.0101	-0.0101221	0.00797741	0.0456056	2.08657e-05	0.271949	0.15959	0.151529	0.845444	0.785921	0.485621	4	77.6787	0.0970513	0	18.61	-0.18	126.624	0.0169289	0.0251701	2.04	0.05	0.0970513	4.35258	-0.18	0.0251701	0.05	-0.0101221	0.485621	0.234379	0.09876	0.762664	0.899848	0.498913	4	0.498913	0.000445856	0	0	0.483865	-0.00502733
2012-03-11	JSE_TOP40	30398.3	30100.6	30710.5	29991.2	786790000	0.0099	0.00984092	0.00934619	0.0456056	1.25077e-05	0.301973	0.0895308	0.166799	0.668923	0.904599	0.457463	4	77.6787	0.0970513	0	15.128	-2.64	126.222	-0.0236216	0.0319691	2.31	0.27	0.0970513	4.35258	-2.64	0.0319691	0.27	0.00984092	0.457463	0.127731	0.119836	0.324324	1	0.392973	4	0.392973	0.000556319	0	0	0.498913	-0.0101221
2012-03-18	JSE_TOP40	29716.9	30398.3	30486.1	29446	487860000	-0.0224	-0.0226694	0.013451	0.0456056	4.64671e-05	0.240928	0.374189	0.212589	0.843835	0.663298	0.523478	4	77.6787	0.0970513	0	15.228	0.35	124.346	0.000958849	0.0278817	2.25	-0.06	0.0970513	4.35258	0.35	0.0278817	-0.06	-0.0226694	0.523478	0.561053	0.183038	0.758669	0.759042	0.565451	4	0.565451	0.000540183	0	0	0.392973	0.00984092
2012-03-25	JSE_TOP40	29603.4	29716.9	30130.7	29413.9	482040000	-0.0038	-0.00382702	0.0135227	0.0456056	7.93922e-06	0.25426	0.0512365	0.213389	0.847241	0.715997	0.456966	4	77.6787	0.0970513	0	15.26	0.68	124.43	-0.0144802	0.0136772	2.23	-0.02	0.0970513	4.35258	0.68	0.0136772	-0.02	-0.00382702	0.456966	0.0694377	0.184143	0.767125	0.819555	0.460065	4	0.460065	0.000388902	0	0	0.565451	-0.0226694
2012-04-01	JSE_TOP40	29754.9	29603.4	30229.4	29217	462710000	0.0051	0.00510292	0.0143535	0.0456056	1.10283e-05	0.263238	0.0771304	0.222656	0.858551	0.751487	0.477456	4	57.4627	-0.301444	0	16.11	1.2	123.687	0.00137657	0.0147061	2.07	-0.16	-0.301444	4.05114	1.2	0.0147061	-0.16	0.00510292	0.477456	0.108855	0.196935	0.795211	0.860307	0.490327	4	0.490327	2.23463e-05	0	0	0.460065	-0.00382702
2012-04-08	JSE_TOP40	29721.3	29754.9	29911.7	29465.4	438190000	-0.0011	-0.00112818	0.011959	0.0456056	2.57464e-06	0.263227	0.00626886	0.195946	0.872899	0.751445	0.456639	4	57.4627	-0.301444	0	19.194	2.85	120.873	-0.0242436	0.0184603	2.02	-0.05	-0.301444	4.05114	2.85	0.0184603	-0.05	-0.00112818	0.456639	0.000985737	0.160066	0.830839	0.860259	0.463038	4	0.463038	1.22639e-05	0	0	0.490327	0.00510292
2012-04-15	JSE_TOP40	30185.8	29721.3	30246.6	29576.5	538800000	0.0156	0.015506	0.00858554	0.0456056	2.87787e-05	0.279413	0.22592	0.158313	0.814029	0.815425	0.503422	4	57.4627	-0.301444	0	18.49	-2.11	117.18	-0.0212827	0.033866	1.99	-0.03	-0.301444	4.05114	-2.11	0.033866	-0.03	0.015506	0.503422	0.33535	0.108124	0.684653	0.933726	0.515463	4	0.515463	1.19865e-05	0	0	0.463038	-0.00112818
2012-04-22	JSE_TOP40	30247.5	30185.8	30247.5	29679.1	410120000	0.002	0.00204325	0.00721348	0.0456056	4.98207e-06	0.253683	0.0264487	0.143007	0.889323	0.713716	0.443124	4	57.4627	-0.301444	0	17.29	-1.12	118.096	0.010279	0.0221273	1.96	-0.03	-0.301444	4.05114	-1.12	0.0221273	-0.03	0.00204325	0.443124	0.0317045	0.087985	0.871625	0.816936	0.452063	4	0.452063	1.19773e-05	0	0	0.515463	0.015506
2012-04-29	JSE_TOP40	30065.5	30247.5	30624.7	30052	426740000	-0.006	-0.00603653	0.00922611	0.0456056	1.41457e-05	0.235451	0.103261	0.165459	0.879598	0.641649	0.447492	4	57.4627	-0.301444	0	17.47	2.84	116.674	-0.0661828	0.0443787	1.91	-0.05	-0.301444	4.05114	2.84	0.0443787	-0.05	-0.00603653	0.447492	0.148632	0.117987	0.847476	0.734182	0.462069	4	0.462069	1.19186e-05	0	0	0.452063	0.00204325
2012-05-06	JSE_TOP40	30076.5	30065.5	30077	29291.5	544200000	0.0004	0.000365136	0.00905378	0.0456056	6.7096e-07	0.232623	0	0.163537	0.810869	0.630471	0.401219	4	55.7222	-0.0307579	0	19.358	0.73	111.778	0.00749468	0.0169942	1.84	-0.07	-0.0307579	4.02038	0.73	0.0169942	-0.07	0.000365136	0.401219	0	0.115333	0.676807	0.721347	0.378372	4	0.378372	9.79294e-06	0	0	0.462069	-0.00603653
2012-05-13	JSE_TOP40	29212.4	30076.5	30091.1	29077.1	668740000	-0.0287	-0.0291485	0.0143968	0.0456056	4.35872e-05	0.271231	0.350049	0.22314	0.737998	0.78308	0.523567	4	55.7222	-0.0307579	0	23.14	5.21	109.866	-0.0405443	0.0251552	1.71	-0.13	-0.0307579	4.02038	5.21	0.0251552	-0.13	-0.0291485	0.523567	0.524306	0.197602	0.49585	0.896586	0.528586	4	0.528586	9.74483e-06	0	0	0.378372	0.000365136
2012-05-20	JSE_TOP40	29074.2	29212.4	29571.5	28802.9	514380000	-0.0047	-0.00474312	0.0131326	0.0456056	9.22105e-06	0.227426	0.0619811	0.209037	0.828318	0.609925	0.427315	4	55.7222	-0.0307579	0	22.024	-3.34	108.144	-0.00157488	0.0297084	1.75	0.04	-0.0307579	4.02038	-3.34	0.0297084	0.04	-0.00474312	0.427315	0.0857938	0.178137	0.720135	0.697755	0.420455	4	0.420455	9.74077e-06	0	0	0.528586	-0.0291485
2012-05-27	JSE_TOP40	29161	29074.2	29532.8	28956.2	602440000	0.003	0.00298136	0.0146958	0.0456056	4.94881e-06	0.222755	0.0261699	0.226476	0.776792	0.591465	0.405226	4	55.7222	-0.0307579	0	23.9725	4.9	103.472	-0.0894586	0.062478	1.47	-0.28	-0.0307579	4.02038	4.9	0.062478	-0.28	0.00298136	0.405226	0.0312801	0.202206	0.592184	0.676557	0.375557	4	0.375557	9.60926e-06	0	0	0.420455	-0.00474312
2012-06-03	JSE_TOP40	29705.4	29161	30106.4	28887.7	570140000	0.0187	0.0184973	0.0198717	0.0456056	3.24435e-05	0.177741	0.256639	0.284214	0.795691	0.413529	0.437518	4	43.2724	-0.252865	0	23.182	-5.43	99.03	-0.0108054	0.0392027	1.65	0.18	-0.252865	3.76751	-5.43	0.0392027	0.18	0.0184973	0.437518	0.382112	0.2819	0.639116	0.472235	0.443841	4	0.443841	3.79108e-06	0	0	0.375557	0.00298136
2012-06-10	JSE_TOP40	29977.3	29705.4	30099.1	29528.8	530580000	0.0092	0.00911024	0.00982398	0.0456056	1.71703e-05	0.162893	0.128615	0.172128	0.818839	0.354838	0.368605	4	43.2724	-0.252865	0	22.542	-0.12	97.214	-0.00451978	0.026607	1.6	-0.05	-0.252865	3.76751	-0.12	0.026607	-0.05	0.00911024	0.368605	0.187227	0.127192	0.696596	0.404841	0.353964	4	0.353964	3.73921e-06	0	0	0.443841	0.0184973
2012-06-17	JSE_TOP40	30025.4	29977.3	30799.9	29967.5	639910000	0.0016	0.00160493	0.007692	0.0456056	2.50805e-06	0.170006	0.00571068	0.148345	0.754867	0.382956	0.32297	4	43.2724	-0.252865	0	18.426	-3	92.458	-0.0849451	0.0538238	1.69	0.09	-0.252865	3.76751	-3	0.0538238	0.09	0.00160493	0.32297	0.000136046	0.0943654	0.53774	0.437129	0.267343	4	0.267343	3.73922e-06	0	0	0.353964	0.00911024
2012-06-24	JSE_TOP40	29638	30025.4	30108.7	29159.4	572560000	-0.0129	-0.012987	0.0132987	0.0456056	2.26824e-05	0.190299	0.174818	0.21089	0.794275	0.46317	0.410788	4	43.2724	-0.252865	0	19.268	-1.03	91.226	0.0539964	0.0449948	1.67	-0.02	-0.252865	3.76751	-1.03	0.0449948	-0.02	-0.012987	0.410788	0.257561	0.180694	0.6356	0.529237	0.400773	4	0.400773	3.79204e-06	0	0	0.267343	0.00160493
2012-07-01	JSE_TOP40	30056.9	29639.3	30261.2	29467.7	368680000	0.0141	0.0140353	0.0117846	0.0456056	3.80689e-05	0.14034	0.303793	0.194	0.913571	0.26569	0.419264	4	55.8216	0.254646	0	17.015	0.02	98.8025	0.0449549	0.0596841	1.57	-0.1	0.254646	4.02216	0.02	0.0596841	-0.1	0.0140353	0.419264	0.453893	0.15738	0.931837	0.302474	0.461396	4	0.461396	9.71685e-06	0	0	0.400773	-0.012987
2012-07-08	JSE_TOP40	29663.6	30055.6	30056.9	29235.1	512450000	-0.0131	-0.0131719	0.0130903	0.0456056	2.57037e-05	0.163155	0.200144	0.208565	0.829447	0.355873	0.398507	4	55.8216	0.254646	0	17.944	-0.36	99.882	0.0340335	0.0318096	1.52	-0.05	0.254646	4.02216	-0.36	0.0318096	-0.05	-0.0131719	0.398507	0.296113	0.177484	0.722939	0.40603	0.400642	4	0.400642	9.85222e-06	0	0	0.461396	0.0140353
2012-07-15	JSE_TOP40	30074.3	29664.4	30271.9	29507.6	507190000	0.0138	0.0137496	0.0155728	0.0456056	2.71094e-05	0.162663	0.211927	0.236259	0.832525	0.353928	0.40866	4	55.8216	0.254646	0	16.294	-0.47	105.4	0.0485518	0.0324033	1.49	-0.03	0.254646	4.02216	-0.47	0.0324033	-0.03	0.0137496	0.40866	0.314049	0.215709	0.730582	0.403796	0.416034	4	0.416034	9.85525e-06	0	0	0.400642	-0.0131719
2012-07-22	JSE_TOP40	30508.2	30072.5	30535	29579.1	467610000	0.0144	0.0143242	0.0136061	0.0456056	3.06328e-05	0.178965	0.241461	0.21432	0.855684	0.418369	0.432458	4	55.8216	0.254646	0	18.532	0.43	104.18	-0.00637662	0.0418956	1.58	0.09	0.254646	4.02216	0.43	0.0418956	0.09	0.0143242	0.432458	0.359007	0.185427	0.788092	0.477793	0.45258	4	0.45258	9.85271e-06	0	0	0.416034	0.0137496
2012-07-29	JSE_TOP40	30981.2	30508.8	31104.2	30325.7	367010000	0.0155	0.015386	0.0138458	0.0322373	4.19227e-05	0.17623	0.336097	0.14489	0.914548	0.407557	0.450773	4	55.8216	0.254646	0	17.826	-1.06	107.274	0.0302983	0.0223564	1.6	0.02	0.254646	4.02216	-1.06	0.0223564	0.02	0.015386	0.450773	0.503067	0.118531	0.934263	0.465378	0.50531	4	0.50531	9.73842e-06	0	0	0.45258	0.0143242
2012-08-05	JSE_TOP40	31330.1	30983.6	31516	30896.8	345290000	0.0113	0.011199	0.00177807	0.0322373	3.24337e-05	0.186769	0.256557	0.0501543	0.927257	0.449214	0.420796	4	47.7966	-0.155206	0	15.456	-0.9	112.494	0.031974	0.0238752	1.65	0.05	-0.155206	3.86695	-0.9	0.0238752	0.05	0.011199	0.420796	0.381988	0.0173979	0.965823	0.513212	0.469605	4	0.469605	4.73596e-06	0	0	0.50531	0.015386
2012-08-12	JSE_TOP40	31376.1	31325	31676.5	31152.9	337990000	0.0015	0.00146748	0.0063387	0.0322373	4.34178e-06	0.184848	0.0210816	0.0611451	0.931528	0.441624	0.363845	4	47.7966	-0.155206	0	14.184	-1.29	115.042	0.0181321	0.0213201	1.81	0.16	-0.155206	3.86695	-1.29	0.0213201	0.16	0.00146748	0.363845	0.0235344	0.0173979	0.976429	0.504496	0.380464	4	0.380464	4.6804e-06	0	0	0.469605	0.011199
2012-08-19	JSE_TOP40	31567.2	31373.4	31690.6	31289.9	364620000	0.0061	0.00607088	0.00605683	0.0322373	1.66499e-05	0.186528	0.124252	0.0580008	0.915946	0.448265	0.386616	4	47.7966	-0.155206	0	15.058	1.73	116.102	0.00484933	0.0212224	1.68	-0.13	-0.155206	3.86695	1.73	0.0212224	-0.13	0.00607088	0.386616	0.180586	0.0173979	0.937736	0.512122	0.411961	4	0.411961	4.68177e-06	0	0	0.380464	0.00146748
2012-08-26	JSE_TOP40	31172.7	31563.6	31714.2	30955.9	437960000	-0.0125	-0.0125743	0.0102151	0.0322373	2.87111e-05	0.167738	0.225353	0.104388	0.873033	0.373988	0.39419	4	47.7966	-0.155206	0	17.04	2.29	113.02	-0.0159349	0.0250247	1.57	-0.11	-0.155206	3.86695	2.29	0.0250247	-0.11	-0.0125743	0.39419	0.334486	0.0626272	0.831173	0.426831	0.413779	4	0.413779	4.86097e-06	0	0	0.411961	0.00607088
2012-09-02	JSE_TOP40	31530.8	31175.4	31551.4	30715	428710000	0.0115	0.0114209	0.0102854	0.0322373	2.664e-05	0.136117	0.207993	0.105171	0.878446	0.248998	0.360152	4	61.9502	0.259377	0	16.425	-3.09	114.11	-0.00254867	0.0214429	1.67	0.1	0.259377	4.12633	-3.09	0.0214429	0.1	0.0114209	0.360152	0.30806	0.0637091	0.844613	0.283306	0.374922	4	0.374922	2.0989e-05	0	0	0.413779	-0.0125743
2012-09-09	JSE_TOP40	32328.8	31493.5	32381.5	31025.6	640280000	0.0253	0.0249946	0.0155612	0.0322373	3.90369e-05	0.137698	0.311907	0.164025	0.75465	0.255248	0.371457	4	61.9502	0.259377	0	15.41	0.13	115.408	0.0332325	0.0184642	1.88	0.21	0.259377	4.12633	0.13	0.0184642	0.21	0.0249946	0.371457	0.466244	0.144943	0.537203	0.290483	0.359718	4	0.359718	2.17628e-05	0	0	0.374922	0.0114209
2012-09-16	JSE_TOP40	31934.9	32331.8	32357.2	31405.8	758950000	-0.0122	-0.0122609	0.01853	0.0291743	1.61551e-05	0.178788	0.120104	0.180622	0.685213	0.417669	0.350902	4	61.9502	0.259377	0	14.14	-0.53	111.832	-0.0543084	0.0561568	1.77	-0.11	0.259377	4.12633	-0.53	0.0561568	-0.11	-0.0122609	0.350902	0.174272	0.174482	0.364775	0.476989	0.29763	4	0.29763	2.18015e-05	0	0	0.359718	0.0249946
2012-09-23	JSE_TOP40	31518.3	31932.9	31934.9	31163.6	500840000	-0.013	-0.0131296	0.0186859	0.0291743	2.62151e-05	0.166973	0.20443	0.182362	0.83624	0.370967	0.3985	4	61.9502	0.259377	0	15.392	1.75	110.354	0.000808516	0.0362998	1.65	-0.12	0.259377	4.12633	1.75	0.0362998	-0.12	-0.0131296	0.3985	0.302637	0.176883	0.739809	0.423362	0.410673	4	0.410673	2.18368e-05	0	0	0.29763	-0.0122609
2012-09-30	JSE_TOP40	32361.9	31518.4	32471.3	31504.8	500730000	0.0268	0.0264131	0.0221801	0.0291743	5.27493e-05	0.183795	0.426849	0.221341	0.836305	0.437462	0.480489	4	61.9502	0.259377	0	15.268	-1.4	111.408	0.00724738	0.0357538	1.75	0.1	0.259377	4.12633	-1.4	0.0357538	0.1	0.0264131	0.480489	0.641214	0.230684	0.739968	0.499718	0.527896	4	0.527896	2.2536e-05	0	0	0.410673	-0.0131296
2012-10-07	JSE_TOP40	32276.1	32356.5	32413.4	31739.4	622260000	-0.0027	-0.00265603	0.0185001	0.0291743	4.26835e-06	0.17669	0.0204661	0.180289	0.765194	0.409377	0.343831	4	65.6199	0.0575485	0	15.9	1.81	114.876	0.0263937	0.0237159	1.69	-0.06	0.0575485	4.18388	1.81	0.0237159	-0.06	-0.00265603	0.343831	0.0225975	0.174021	0.563386	0.467467	0.306868	4	0.306868	3.71065e-05	0	0	0.527896	0.0264131
2012-10-14	JSE_TOP40	32609.8	32276.4	33122.3	32210	495400000	0.0103	0.0102852	0.017064	0.0291743	2.07615e-05	0.146824	0.158717	0.164269	0.839424	0.29132	0.363432	4	65.6199	0.0575485	0	15.53	0.92	113.592	-0.0288931	0.016718	1.79	0.1	0.0575485	4.18388	0.92	0.016718	0.1	0.0102852	0.363432	0.23305	0.15191	0.747713	0.331905	0.366144	4	0.366144	3.82454e-05	0	0	0.306868	-0.00265603
2012-10-21	JSE_TOP40	32719.1	32610.4	32965.8	32419.6	307360000	0.0034	0.00334768	0.0125459	0.0291743	1.08917e-05	0.122016	0.0759853	0.113868	0.949451	0.193259	0.333141	4	65.6199	0.0575485	0	17.942	0.75	108.27	-0.0270862	0.0304564	1.78	-0.01	0.0575485	4.18388	0.75	0.0304564	-0.01	0.00334768	0.333141	0.107112	0.0823425	1	0.219303	0.352189	4	0.352189	3.81823e-05	0	0	0.366144	0.0102852
2012-10-28	JSE_TOP40	33512.9	32716.8	33518.8	32524	385430000	0.0243	0.0239711	0.0114502	0.0251078	6.21932e-05	0.149697	0.506011	0.0797117	0.90377	0.302678	0.448043	4	65.6199	0.0575485	0	17.6267	-0.22	108.85	-0.0195657	0.0221279	1.75	-0.03	0.0575485	4.18388	-0.22	0.0221279	-0.03	0.0239711	0.448043	0.761719	0.0642468	0.907499	0.344947	0.519603	4	0.519603	3.62393e-05	0	0	0.352189	0.00334768
2012-11-04	JSE_TOP40	33122.5	33508.2	33597.9	32989.8	453780000	-0.0117	-0.0117185	0.0148483	0.0251078	2.58243e-05	0.137252	0.201155	0.117619	0.863777	0.253484	0.359008	4	56.6946	-0.1462	0	18.436	1.02	107.782	0.0168992	0.0405295	1.61	-0.14	-0.1462	4.03768	1.02	0.0405295	-0.14	-0.0117185	0.359008	0.297651	0.116569	0.808187	0.288458	0.377716	4	0.377716	1.15534e-05	0	0	0.519603	0.0239711
2012-11-11	JSE_TOP40	32612.5	33122.7	33336.6	32571.7	508310000	-0.0154	-0.0155175	0.0179252	0.0251078	3.05276e-05	0.119238	0.240579	0.151942	0.83187	0.182277	0.351667	4	56.6946	-0.1462	0	17.13	-2.2	109.118	-0.0167119	0.036904	1.58	-0.03	-0.1462	4.03768	-2.2	0.036904	-0.03	-0.0155175	0.351667	0.357665	0.163944	0.728955	0.206692	0.364314	4	0.364314	1.09316e-05	0	0	0.377716	-0.0117185
2012-11-18	JSE_TOP40	33634.4	32621.5	33752.5	32621.5	338160000	0.0313	0.0308564	0.0239063	0.0243521	9.1248e-05	0.157108	0.749557	0.214587	0.931429	0.331972	0.556886	4	56.6946	-0.1462	0	15.1925	-1.27	110.255	0.0307007	0.0314315	1.7	0.12	-0.1462	4.03768	-1.27	0.0314315	0.12	0.0308564	0.556886	1	0.256037	0.976182	0.378585	0.652701	4	0.652701	1.0914e-05	0	0	0.364314	-0.0155175
2012-11-25	JSE_TOP40	33872.7	33625.3	33872.7	33204.6	427540000	0.0071	0.00705854	0.0212254	0.0243521	1.65097e-05	0.156373	0.123077	0.184681	0.87913	0.329067	0.378989	4	56.6946	-0.1462	0	15.572	0.73	109.816	0.00633544	0.0240082	1.62	-0.08	-0.1462	4.03768	0.73	0.0240082	-0.08	0.00705854	0.378989	0.178797	0.214758	0.846313	0.375249	0.403779	4	0.403779	1.08352e-05	0	0	0.652701	0.0308564
2012-12-02	JSE_TOP40	33909.7	33865.8	34131.8	33667	407470000	0.0011	0.00109143	0.0192006	0.0243521	2.67856e-06	0.108068	0.00713996	0.162094	0.890874	0.138122	0.299558	4	53.5168	-0.0576846	0	16.54	0.03	109.078	-0.0337647	0.0194034	1.64	0.02	-0.0576846	3.98	0.03	0.0194034	0.02	0.00109143	0.299558	0.00231177	0.183583	0.875475	0.15599	0.30434	4	0.30434	7.72183e-06	0	0	0.403779	0.00705854
2012-12-09	JSE_TOP40	34277.2	33908.2	34460.4	33715.2	372400000	0.0108	0.0107802	0.0129057	0.0228317	2.89479e-05	0.0894573	0.227338	0.0842475	0.911394	0.0645576	0.321884	4	53.5168	-0.0576846	0	16.226	1.1	109.096	0.0195904	0.0276247	1.72	0.08	-0.0576846	3.98	1.1	0.0276247	0.08	0.0107802	0.321884	0.337508	0.0866572	0.926432	0.0715165	0.355528	4	0.355528	7.66634e-06	0	0	0.30434	0.00109143
2012-12-16	JSE_TOP40	34727.3	34284.6	34906.2	34276.1	499150000	0.0131	0.0130454	0.00522175	0.0228317	2.61353e-05	0.102519	0.203762	0	0.837229	0.116187	0.289294	4	53.5168	-0.0576846	0	16.956	0.84	109.792	-0.00137356	0.0153241	1.77	0.05	-0.0576846	3.98	0.84	0.0153241	0.05	0.0130454	0.289294	0.301619	0	0.742264	0.130802	0.293671	4	0.293671	7.68695e-06	0	0	0.355528	0.0107802
2012-12-23	JSE_TOP40	34930.6	34727.4	35042.4	34626.4	75160000	0.0059	0.0058374	0.00532926	0.0228317	7.76663e-05	0.0623806	0.635711	0	1	0	0.408928	4	53.5168	-0.0576846	0	19.8775	4.88	109.812	0.00839498	0.0226085	1.73	-0.04	-0.0576846	3.98	4.88	0.0226085	-0.04	0.0058374	0.408928	0.959155	0	1	0	0.489789	4	0.489789	8.8913e-06	0	0	0.293671	0.0130454
2012-12-30	JSE_TOP40	35775.9	34926.7	35822.6	34625	170150000	0.0242	0.023911	0.00763025	0.0228317	0.000140529	0.0527796	1	0.0253984	1	0	0.50635	4	53.5168	-0.0576846	0	15.2725	-8.89	112.347	0.0227293	0.0210207	1.93	0.2	-0.0576846	3.98	-8.89	0.0210207	0.2	0.023911	0.50635	1	0.00542959	1	0	0.501357	4	0.501357	7.59939e-05	0	0	0.489789	0.0058374
2013-01-06	JSE_TOP40	35792.5	35780.5	35888.4	35529	365160000	0.0005	0.000464451	0.0101389	0.0228317	1.27191e-06	0.0886422	0	0.0533828	0.915631	0.0613359	0.257587	4	83.8784	0.449372	0	13.614	-0.47	112.372	-0.0204602	0.0244248	1.89	-0.04	0.449372	4.42937	-0.47	0.0244248	-0.04	0.000464451	0.257587	0	0.0440555	0.936951	0.067817	0.262206	4	0.262206	0.00381467	0	0	0.501357	0.023911
2013-01-13	JSE_TOP40	35723.8	35795.6	35954	35338.1	571560000	-0.0019	-0.00192236	0.0116852	0.0228317	3.36336e-06	0.106787	0.0128801	0.0706329	0.79486	0.133059	0.252858	4	83.8784	0.449372	0	13.304	-0.9	111.346	0.0127023	0.0135134	1.87	-0.02	0.449372	4.42937	-0.9	0.0135134	-0.02	-0.00192236	0.252858	0.0110497	0.0678653	0.637053	0.150175	0.216536	4	0.216536	0.00561858	0	0	0.262206	0.000464451
2013-01-20	JSE_TOP40	36064.4	35724.3	36159.6	35224.4	370990000	0.0095	0.0094891	0.0116992	0.0228317	2.55778e-05	0.0954115	0.199088	0.0707887	0.912219	0.0880938	0.317548	4	83.8784	0.449372	0	12.6175	0.43	113.718	0.019239	0.0159728	1.98	0.11	0.449372	4.42937	0.43	0.0159728	0.11	0.0094891	0.317548	0.294506	0.0680804	0.928481	0.0985427	0.347402	4	0.347402	0.00565426	0	0	0.216536	-0.00192236
2013-01-27	JSE_TOP40	36219.1	36068	36391.8	35851	346800000	0.0043	0.0042801	0.00497934	0.0228317	1.23417e-05	0.113554	0.0881394	0	0.926373	0.15981	0.293581	4	83.8784	0.449372	0	13.676	0.01	115.132	0.0145581	0.0115391	2.04	0.06	0.449372	4.42937	0.01	0.0115391	0.06	0.0042801	0.293581	0.125613	0	0.963629	0.180894	0.317534	4	0.317534	0.00392501	0	0	0.347402	0.0094891
2013-02-03	JSE_TOP40	36477.5	36230.2	36568.1	36036.9	471520000	0.0071	0.00710876	0.00492489	0.0224451	1.50763e-05	0.106691	0.111061	0	0.853396	0.13268	0.274284	4	63.8478	-0.272866	0	13.664	0.12	117.154	0.0285795	0.018422	1.99	-0.05	-0.272866	4.1565	0.12	0.018422	-0.05	0.00710876	0.274284	0.160506	0	0.782411	0.14974	0.273164	4	0.273164	0.000271174	0	0	0.317534	0.0042801
2013-02-10	JSE_TOP40	36242.9	36481.8	36545	36052	438010000	-0.0064	-0.00645214	0.00703564	0.0224451	1.47306e-05	0.0945369	0.108164	0.0187654	0.873004	0.0846366	0.271142	4	63.8478	-0.272866	0	12.736	-0.56	118.098	-0.0126959	0.0119519	2.01	0.02	-0.272866	4.1565	-0.56	0.0119519	0.02	-0.00645214	0.271142	0.156095	0	0.831101	0.0945728	0.270442	4	0.270442	4.76557e-05	0	0	0.273164	0.00710876
2013-02-17	JSE_TOP40	35249.9	36243.3	36361	35173.4	372210000	-0.0274	-0.02778	0.0158299	0.0265326	7.46353e-05	0.0905492	0.610304	0.136254	0.911505	0.0688739	0.431734	4	63.8478	-0.272866	0	14.095	1.71	115.3	-0.0316718	0.0196672	1.97	-0.04	-0.272866	4.1565	1.71	0.0196672	-0.04	-0.02778	0.431734	0.920479	0.131683	0.926708	0.0764728	0.513836	4	0.513836	7.21733e-05	0	0	0.270442	-0.00645214
2013-02-24	JSE_TOP40	35653.8	35250.2	35721.1	34583.9	553040000	0.0115	0.0113936	0.0176243	0.0265326	2.06018e-05	0.0802422	0.157378	0.156271	0.805697	0.0281319	0.286869	4	63.8478	-0.272866	0	16.292	1.19	112.418	-0.0321629	0.0251025	1.86	-0.11	-0.272866	4.1565	1.19	0.0251025	-0.11	0.0113936	0.286869	0.231012	0.159312	0.663962	0.0296893	0.270994	4	0.270994	0.000693791	0	0	0.513836	-0.02778
2013-03-03	JSE_TOP40	36168.7	35656.6	36397.5	35336.8	594380000	0.0144	0.0143367	0.0194134	0.0265326	2.41204e-05	0.10489	0.186873	0.176229	0.781508	0.12556	0.317542	4	77.1317	0.189013	0	13.334	-2.77	109.984	-0.0112304	0.0148436	2.06	0.2	0.189013	4.34551	-2.77	0.0148436	0.2	0.0143367	0.317542	0.27591	0.186859	0.603895	0.141565	0.302057	4	0.302057	0.0107626	0	0	0.270994	0.0113936
2013-03-10	JSE_TOP40	36226.7	36164.7	36521.9	36138.8	585530000	0.0016	0.00160425	0.019232	0.0265326	2.73982e-06	0.128883	0.00765343	0.174205	0.786686	0.220402	0.297237	4	77.1317	0.189013	0	11.652	-1.29	108.41	0.00375751	0.0156496	2.01	-0.05	0.189013	4.34551	-1.29	0.0156496	-0.05	0.00160425	0.297237	0.00309339	0.184065	0.616754	0.25047	0.263596	4	0.263596	0.0326161	0	0	0.302057	0.0143367
2013-03-17	JSE_TOP40	35493.6	36226.3	36226.3	35392.2	555680000	-0.0202	-0.020444	0.0157482	0.0257908	3.6791e-05	0.158044	0.293081	0.131341	0.804152	0.335672	0.391062	4	77.1317	0.189013	0	13.596	2.27	107.328	-0.0260405	0.0272247	1.93	-0.08	0.189013	4.34551	2.27	0.0272247	-0.08	-0.020444	0.391062	0.437586	0.130424	0.660126	0.382833	0.402742	4	0.402742	0.0809987	0	0	0.263596	0.00160425
2013-03-24	JSE_TOP40	35259.1	35494.8	35840.2	35144.6	403410000	-0.0066	-0.00662931	0.0145949	0.0257908	1.64332e-05	0.15217	0.122436	0.118476	0.893249	0.312452	0.361653	4	77.1317	0.189013	0	13.09	-0.87	107.683	0.0181426	0.0137917	1.87	-0.06	0.189013	4.34551	-0.87	0.0137917	-0.06	-0.00662931	0.361653	0.177821	0.112667	0.881374	0.35617	0.382008	4	0.382008	0.188554	0	0	0.402742	-0.020444
2013-03-31	JSE_TOP40	33920.6	35260.7	35503.7	33783	417130000	-0.038	-0.038702	0.0176337	0.0318768	9.27817e-05	0.167384	0.762413	0.1852	0.885221	0.372591	0.551357	4	77.1317	0.189013	0	13.676	1.22	107.062	-0.0421829	0.0336505	1.72	-0.15	0.189013	4.34551	1.22	0.0336505	-0.15	-0.038702	0.551357	1	0.174951	0.861439	0.425227	0.615404	4	0.615404	0.42785	0	0	0.382008	-0.00662931
2013-04-07	JSE_TOP40	33990.3	33917.4	34515.1	33774.8	537260000	0.0021	0.00205446	0.0177847	0.0318768	3.82395e-06	0.164016	0.016741	0.186885	0.81493	0.359275	0.344458	4	99.3251	0.252884	0	12.538	-1.86	103.248	-0.0332451	0.0346977	1.75	0.03	0.252884	4.5984	-1.86	0.0346977	0.03	0.00205446	0.344458	0.0169269	0.177276	0.68689	0.409937	0.322757	4	0.322757	0.960339	1	0.252884	0.615404	-0.038702
2013-04-14	JSE_TOP40	33842.2	33988.3	34058.3	33156.7	482850000	-0.0044	-0.00436664	0.0182356	0.0318768	9.04347e-06	0.140004	0.0604927	0.191914	0.846767	0.264361	0.340884	4	99.3251	0.252884	0	16.054	2.91	98.092	-0.0164398	0.0273994	1.73	-0.02	0.252884	4.5984	2.91	0.0273994	-0.02	-0.00436664	0.340884	0.083528	0.184218	0.765948	0.300948	0.33366	4	0.33366	0.988824	1	0.252884	0.322757	0.00205446
2013-04-21	JSE_TOP40	34427.1	33853.4	34668.2	33428.5	541120000	0.0173	0.017134	0.0236089	0.0318768	3.1664e-05	0.196837	0.250105	0.251856	0.812672	0.489012	0.450911	4	99.3251	0.252884	0	13.742	-1.36	100.608	0.0342754	0.0188725	1.7	-0.03	0.252884	4.5984	-1.36	0.0188725	-0.03	0.017134	0.450911	0.372166	0.266954	0.681282	0.558912	0.469828	4	0.469828	0.987873	1	0.252884	0.33366	-0.00436664
2013-04-28	JSE_TOP40	34964	34426.7	35025.3	33946.6	462470000	0.0156	0.0154746	0.010438	0.0318768	3.34608e-05	0.167092	0.265167	0.104931	0.858692	0.371435	0.400056	4	99.3251	0.252884	0	13.632	-0.76	101.534	0.0213545	0.0579585	1.78	0.08	0.252884	4.5984	-0.76	0.0579585	0.08	0.0154746	0.400056	0.395094	0.0641569	0.79556	0.4239	0.419678	4	0.419678	0.941642	1	0.252884	0.469828	0.017134
2013-05-05	JSE_TOP40	35579.8	34965.6	36041.4	34942.8	407930000	0.0176	0.0174605	0.010564	0.0318768	4.28027e-05	0.162897	0.343474	0.106336	0.890605	0.354853	0.423817	4	66.1256	-0.406842	0	12.774	-0.26	103.774	-0.0319584	0.0263348	1.9	0.12	-0.406842	4.19156	-0.26	0.0263348	0.12	0.0174605	0.423817	0.514296	0.0660967	0.874807	0.404858	0.465014	4	0.465014	0.0799221	0	0	0.419678	0.0154746
2013-05-12	JSE_TOP40	36771.8	35581.5	36984.4	35457.2	536110000	0.0335	0.0329526	0.0081778	0.0289753	6.14662e-05	0.196521	0.499916	0.0640671	0.815603	0.487766	0.466838	4	66.1256	-0.406842	0	12.73	-0.14	102.908	0.0245698	0.0304436	1.95	0.05	-0.406842	4.19156	-0.14	0.0304436	0.05	0.0329526	0.466838	0.752441	0.0140346	0.688561	0.55748	0.503129	4	0.503129	0.00681879	0	0	0.465014	0.0174605
2013-05-19	JSE_TOP40	36444.2	36772.9	37511.1	36165.7	648160000	-0.0089	-0.00894837	0.0173182	0.0289753	1.38058e-05	0.173519	0.100412	0.166031	0.750039	0.39684	0.353331	4	66.1256	-0.406842	0	13.654	1.54	102.298	-0.025261	0.0257914	2.01	0.06	-0.406842	4.19156	1.54	0.0257914	0.06	-0.00894837	0.353331	0.144295	0.154772	0.525753	0.453072	0.319473	4	0.319473	0.000617172	0	0	0.503129	0.0329526
2013-05-26	JSE_TOP40	37599.9	36446.3	37801.5	36437	395320000	0.0317	0.0312175	0.0193621	0.0289753	7.89676e-05	0.1837	0.646619	0.188831	0.897983	0.437085	0.54263	4	66.1256	-0.406842	0	15.035	2.31	102.032	-0.00803297	0.0324442	2.16	0.15	-0.406842	4.19156	2.31	0.0324442	0.15	0.0312175	0.54263	0.975759	0.186243	0.893129	0.499285	0.638604	4	0.638604	9.14768e-05	0	0	0.319473	-0.00894837
2013-06-02	JSE_TOP40	36345.7	37505	37505	35604.6	781540000	-0.0334	-0.0339239	0.0325469	0.0334686	4.34064e-05	0.230982	0.348534	0.360148	0.671995	0.623985	0.501165	4	66.8992	0.0116306	0	16.364	-1.16	102.924	0.0356028	0.0202301	2.17	0.01	0.0116306	4.20319	-1.16	0.0202301	0.01	-0.0339239	0.501165	0.521999	0.41298	0.331952	0.713899	0.495208	4	0.495208	5.17566e-05	0	0	0.638604	0.0312175
2013-06-09	JSE_TOP40	35937.4	36360.6	36725.1	34689.4	740660000	-0.0112	-0.0112968	0.0270885	0.0334686	1.52523e-05	0.205846	0.112537	0.299257	0.695915	0.524624	0.408083	4	66.8992	0.0116306	0	16.932	2.01	103.392	0.00984853	0.0326073	2.14	-0.03	0.0116306	4.20319	2.01	0.0326073	-0.03	-0.0112968	0.408083	0.162753	0.328934	0.391351	0.599804	0.370711	4	0.370711	4.79913e-05	0	0	0.495208	-0.0339239
2013-06-16	JSE_TOP40	34670.3	35940.2	36723.7	34628.2	666070000	-0.0353	-0.0358951	0.0311928	0.0361737	5.38909e-05	0.208246	0.436418	0.359632	0.73956	0.53411	0.51743	4	66.8992	0.0116306	0	17.888	1.75	103.93	-0.0461486	0.037019	2.52	0.38	0.0116306	4.20319	1.75	0.037019	0.38	-0.0358951	0.51743	0.655781	0.406413	0.49973	0.610697	0.543155	4	0.543155	4.76015e-05	0	0	0.370711	-0.0112968
2013-06-23	JSE_TOP40	35051.5	34662.2	35187.2	33515.5	684600000	0.011	0.0109336	0.0220232	0.0361737	1.59707e-05	0.21413	0.118559	0.257342	0.728717	0.557368	0.415497	4	66.8992	0.0116306	0	17.902	-2.04	101.432	0.0210015	0.0289512	2.52	0	0.0116306	4.20319	-2.04	0.0289512	0	0.0109336	0.415497	0.17192	0.265225	0.472806	0.637404	0.386839	4	0.386839	4.72134e-05	0	0	0.543155	-0.0358951
2013-06-30	JSE_TOP40	34684.5	35051.5	35634.6	34614.1	492160000	-0.0105	-0.0105244	0.0191418	0.0361737	2.1384e-05	0.138027	0.163935	0.225199	0.841319	0.256547	0.37175	4	66.8992	0.0116306	0	15.975	-1.97	105.183	0.0473535	0.0261141	2.73	0.21	0.0116306	4.20319	-1.97	0.0261141	0.21	-0.0105244	0.37175	0.240993	0.220859	0.752421	0.291975	0.376562	4	0.376562	4.34699e-05	0	0	0.386839	0.0109336
2013-07-07	JSE_TOP40	36227.3	34684.5	36432.3	34684.5	415240000	0.0445	0.0435184	0.0336476	0.0361737	0.000104803	0.12781	0.863179	0.387016	0.886327	0.216159	0.58817	4	41.9861	-0.465848	0	14.238	-1.05	108.258	0.0145044	0.00998956	2.61	-0.12	-0.465848	3.73734	-1.05	0.00998956	-0.12	0.0435184	0.58817	1	0.44421	0.864185	0.245598	0.638498	4	0.638498	3.97919e-06	0	0	0.376562	-0.0105244
2013-07-14	JSE_TOP40	36029.7	36227.3	36609.3	35730.4	446590000	-0.0055	-0.00546827	0.0243877	0.0361737	1.22445e-05	0.12566	0.0873247	0.283719	0.867984	0.207663	0.361672	4	41.9861	-0.465848	0	13.66	-1.3	109.412	0.00283922	0.00533475	2.5	-0.11	-0.465848	3.73734	-1.3	0.00533475	-0.11	-0.00546827	0.361672	0.124373	0.301632	0.818634	0.235842	0.37012	4	0.37012	4.24647e-06	0	0	0.638498	0.0435184
2013-07-21	JSE_TOP40	36026.2	36029.7	36740.2	35885.5	440380000	-0.0001	-9.77019e-05	0.0248089	0.0361737	2.21858e-07	0.122415	0	0.288418	0.871617	0.194833	0.338717	4	41.9861	-0.465848	0	12.764	0.18	108.398	-0.0163205	0.0125225	2.58	0.08	-0.465848	3.73734	0.18	0.0125225	0.08	-9.77019e-05	0.338717	0	0.308118	0.827657	0.22111	0.339221	4	0.339221	7.46115e-05	0	0	0.37012	-0.00546827
2013-07-28	JSE_TOP40	37218.3	36026.2	37624.3	36026.2	440690000	0.0331	0.0325549	0.0240885	0.0361737	7.38727e-05	0.124567	0.603911	0.280381	0.871436	0.20334	0.489767	4	41.9861	-0.465848	0	13.03	-0.74	108.606	0.0189693	0.0208757	2.63	0.05	-0.465848	3.73734	-0.74	0.0208757	0.05	0.0325549	0.489767	0.910748	0.297025	0.827207	0.230878	0.566464	4	0.566464	0.00820223	0	0	0.339221	-9.77019e-05
2013-08-04	JSE_TOP40	37314	37218.3	37521.1	36867.4	350360000	0.0026	0.00256775	0.0171068	0.0361737	7.32888e-06	0.118366	0.0461204	0.202498	0.92429	0.178831	0.337935	4	99.3562	0.861372	0	12.736	1.43	108.556	-0.0104531	0.0179301	2.57	-0.06	0.861372	4.59871	1.43	0.0179301	-0.06	0.00256775	0.337935	0.0616498	0.189526	0.958456	0.202735	0.353092	4	0.353092	0.946957	1	0.861372	0.566464	0.0325549
2013-08-11	JSE_TOP40	38623.6	37314	38682.9	37314	474520000	0.0351	0.0344954	0.0186913	0.0361737	7.26954e-05	0.0825479	0.594043	0.220173	0.851641	0.0372459	0.425776	4	99.3562	0.861372	0	13.452	0.96	110.726	0.0302324	0.0194522	2.84	0.27	0.861372	4.59871	0.96	0.0194522	0.27	0.0344954	0.425776	0.895726	0.213922	0.778052	0.0401547	0.481964	4	0.481964	0.997142	1	0.861372	0.353092	0.00256775
2013-08-18	JSE_TOP40	38652.1	38623.6	38715.9	38069.5	457490000	0.0007	0.000737359	0.0184339	0.0361737	1.61175e-06	0.105905	0	0.217302	0.861606	0.129572	0.30212	4	99.3562	0.861372	0	14.938	-0.39	111.12	0.00267929	0.0163538	2.82	-0.02	0.861372	4.59871	-0.39	0.0163538	-0.02	0.000737359	0.30212	0	0.209959	0.802796	0.146171	0.289732	4	0.289732	0.999824	1	0.861372	0.481964	0.0344954
2013-08-25	JSE_TOP40	37863.9	38652.1	38973.6	37640.4	5.1904e+08	-0.0204	-0.0206027	0.0227127	0.0361737	3.96938e-05	0.138096	0.317414	0.265034	0.825591	0.256821	0.416215	4	99.3562	0.861372	0	16.414	3.03	115.318	0.0337618	0.0294433	2.78	-0.04	0.861372	4.59871	3.03	0.0294433	-0.04	-0.0206027	0.416215	0.474626	0.275842	0.713364	0.292289	0.43903	4	0.43903	0.999969	1	0.861372	0.289732	0.000737359
2013-09-01	JSE_TOP40	38422.1	37863.9	38673.8	37848.2	402370000	0.0147	0.0146341	0.0232021	0.0361737	3.63698e-05	0.145132	0.289551	0.270493	0.893858	0.284632	0.434633	4	142.849	0.363075	1	16.0275	-1.16	116.025	0.0101236	0.0123846	2.94	0.16	0.363075	4.96179	-1.16	0.0123846	0.16	0.0146341	0.434633	0.432212	0.283377	0.882885	0.324225	0.480675	4	0.480675	1	1	0.363075	0.43903	-0.0206027
2013-09-08	JSE_TOP40	39071.5	38422.1	39243.7	38215.6	5.3566e+08	0.0169	0.0167605	0.0171936	0.0361737	3.12894e-05	0.151004	0.246965	0.203466	0.815866	0.307841	0.393535	4	142.849	0.363075	1	14.486	-1.69	113.218	-0.0333277	0.0328307	2.9	-0.04	0.363075	4.96179	-1.69	0.0328307	-0.04	0.0167605	0.393535	0.367386	0.190862	0.689215	0.350875	0.399585	4	0.399585	1	1	0.363075	0.480675	0.0146341
2013-09-15	JSE_TOP40	39542.4	39071.5	39813.7	38783.5	691320000	0.0121	0.01198	0.0176392	0.0361737	1.73291e-05	0.165289	0.129945	0.208437	0.724785	0.364309	0.356869	4	142.849	0.363075	1	13.756	-1.04	109.976	-0.0276491	0.0311288	2.75	-0.15	0.363075	4.96179	-1.04	0.0311288	-0.15	0.01198	0.356869	0.189253	0.197723	0.463042	0.415717	0.316434	4	0.316434	1	1	0.363075	0.399585	0.0167605
2013-09-22	JSE_TOP40	39774.2	39542.4	39993.6	39360.4	281910000	0.0059	0.00584444	0.00473007	0.0361737	2.07316e-05	0.164206	0.158466	0.0713857	0.964342	0.360029	0.388556	4	142.849	0.363075	1	14.384	2.34	108.802	-0.00701054	0.0249954	2.64	-0.11	0.363075	4.96179	2.34	0.0249954	-0.11	0.00584444	0.388556	0.232668	0.0381826	1	0.410802	0.420413	4	0.420413	1	1	0.363075	0.316434	0.01198
2013-09-29	JSE_TOP40	39285.2	39774.2	39774.2	38994.3	377720000	-0.0123	-0.0123709	0.0127575	0.0361737	3.27514e-05	0.172486	0.25922	0.15398	0.908281	0.392758	0.42856	4	142.849	0.363075	1	16.63	1.28	108.634	-0.000274135	0.022859	2.66	0.02	0.363075	4.96179	1.28	0.022859	0.02	-0.0123709	0.42856	0.386041	0.122559	0.918702	0.448384	0.468921	4	0.468921	0.999971	1	0.363075	0.420413	0.00584444
2013-10-06	JSE_TOP40	38903.5	39285.2	39285.5	38069.2	367850000	-0.0097	-0.00976262	0.0118516	0.0361737	2.65397e-05	0.15705	0.207151	0.143875	0.914057	0.33174	0.399206	4	59.135	-0.881963	0	18.31	-1.02	110.304	0.0111784	0.0300972	2.7	0.04	-0.881963	4.07982	-1.02	0.0300972	0.04	-0.00976262	0.399206	0.306779	0.10861	0.933043	0.378319	0.431688	4	0.431688	0.033592	0	0	0.468921	-0.0123709
2013-10-13	JSE_TOP40	39894.5	38903.5	40066.1	38636.2	452910000	0.0255	0.0251532	0.0172776	0.0361737	5.55369e-05	0.16242	0.450216	0.204403	0.864286	0.352968	0.467968	4	59.135	-0.881963	0	15.192	-2.68	110.108	-0.0113612	0.0132609	2.6	-0.1	-0.881963	4.07982	-2.68	0.0132609	-0.1	0.0251532	0.467968	0.676785	0.192156	0.809451	0.402694	0.520271	4	0.520271	0.0011423	0	0	0.431688	-0.00976262
2013-10-20	JSE_TOP40	40314.9	39894.5	40664	39894.5	389720000	0.0105	0.0104829	0.0177515	0.0361737	2.68986e-05	0.167143	0.21016	0.209689	0.90126	0.371638	0.423187	4	59.135	-0.881963	0	13.24	0.05	107.822	-0.034406	0.0216542	2.53	-0.07	-0.881963	4.07982	0.05	0.0216542	-0.07	0.0104829	0.423187	0.311359	0.199452	0.901266	0.424133	0.459052	4	0.459052	5.26877e-05	0	0	0.520271	0.0251532
2013-10-27	JSE_TOP40	40729.2	40314.9	40849	40314.9	357390000	0.0103	0.0102242	0.0143371	0.0361737	2.86078e-05	0.163303	0.224487	0.171601	0.920177	0.356459	0.418181	4	59.135	-0.881963	0	13.48	0.19	107.61	0.000756573	0.0306385	2.65	0.12	-0.881963	4.07982	0.19	0.0306385	0.12	0.0102242	0.418181	0.333169	0.14688	0.948241	0.406702	0.458748	4	0.458748	1.62698e-05	0	0	0.459052	0.0104829
2013-11-03	JSE_TOP40	40698.6	40729.2	41473.9	40559.6	412440000	-0.0008	-0.000751832	0.0106299	0.0361737	1.82289e-06	0.153553	0	0.130246	0.887966	0.317918	0.334032	4	61.4444	0.0383098	0	13.136	-0.38	104.538	-0.014186	0.0274923	2.77	0.12	0.0383098	4.11813	-0.38	0.0274923	0.12	-0.000751832	0.334032	0	0.0897983	0.868254	0.362446	0.330125	4	0.330125	2.01007e-05	0	0	0.458748	0.0102242
2013-11-10	JSE_TOP40	40394.4	40698.6	40976.8	39825.6	470620000	-0.0075	-0.00750229	0.00880351	0.0361737	1.59413e-05	0.178104	0.118312	0.109872	0.853923	0.414964	0.374268	4	61.4444	0.0383098	0	12.486	-0.71	107.098	0.0372679	0.0205106	2.71	-0.06	0.0383098	4.11813	-0.71	0.0205106	-0.06	-0.00750229	0.374268	0.171544	0.0616773	0.783718	0.473883	0.372706	4	0.372706	2.02732e-05	0	0	0.330125	-0.000751832
2013-11-17	JSE_TOP40	39642.7	40394.4	40648.3	39376.4	442160000	-0.0186	-0.0187828	0.0121588	0.0361737	4.24797e-05	0.147302	0.340766	0.147302	0.870576	0.293209	0.412963	4	61.4444	0.0383098	0	12.962	0.07	109.324	0.0283248	0.0211009	2.75	0.04	0.0383098	4.11813	0.07	0.0211009	0.04	-0.0187828	0.412963	0.510175	0.11334	0.825071	0.334073	0.445665	4	0.445665	2.02916e-05	0	0	0.372706	-0.00750229
2013-11-24	JSE_TOP40	40169.3	39642.7	40291.4	39174.7	413540000	0.0133	0.0131957	0.0133651	0.0361737	3.19091e-05	0.130478	0.25216	0.160758	0.887322	0.226706	0.381736	4	61.4444	0.0383098	0	13.07	1.44	111.315	-0.00260756	0.0136852	2.75	0	0.0383098	4.11813	1.44	0.0136852	0	0.0131957	0.381736	0.375293	0.131913	0.866655	0.257709	0.407893	4	0.407893	2.05292e-05	0	0	0.445665	-0.0187828
2013-12-01	JSE_TOP40	39905.2	40169.3	40169.3	39113.8	412650000	-0.0066	-0.00659638	0.0132895	0.0361737	1.59854e-05	0.141592	0.118682	0.159915	0.887843	0.270637	0.359269	4	63.1791	0.0278407	0	14.47	0.09	112.278	0.00386396	0.0187795	2.88	0.13	0.0278407	4.14597	0.09	0.0187795	0.13	-0.00659638	0.359269	0.172107	0.13075	0.867949	0.308155	0.36974	4	0.36974	2.58125e-05	0	0	0.407893	0.0131957
2013-12-08	JSE_TOP40	38537.6	39905.2	40191.4	38246.1	449910000	-0.0343	-0.0348741	0.0202734	0.0364904	7.75134e-05	0.138443	0.634429	0.23953	0.866041	0.258191	0.499548	4	63.1791	0.0278407	0	14.824	1.97	109.104	-0.0311529	0.019869	2.88	0	0.0278407	4.14597	1.97	0.019869	0	-0.0348741	0.499548	0.957204	0.239955	0.81381	0.293863	0.576208	4	0.576208	2.61107e-05	0	0	0.36974	-0.00659638
2013-12-15	JSE_TOP40	39833.7	38537.6	39879	38537.6	484580000	0.0336	0.0330799	0.0289963	0.0364904	6.82652e-05	0.143993	0.556908	0.336837	0.845755	0.28013	0.504907	4	63.1791	0.0278407	0	14.796	-1.97	110.34	0.0369656	0.0297211	2.89	0.01	0.0278407	4.14597	-1.97	0.0297211	0.01	0.0330799	0.504907	0.839197	0.374264	0.763434	0.319055	0.573988	4	0.573988	2.61258e-05	0	0	0.576208	-0.0348741
2013-12-22	JSE_TOP40	40974.7	39833.7	41022.5	39801.7	93080000	0.0286	0.0282425	0.0319015	0.0364904	0.000303422	0.136533	1	0.369245	1	0.250642	0.654972	4	63.1791	0.0278407	0	12.5775	-1.33	111.715	-0.000802819	0.0063183	3.02	0.13	0.0278407	4.14597	-1.33	0.0063183	0.13	0.0282425	0.654972	1	0.418997	1	0.285195	0.676048	4	0.676048	2.60952e-05	0	0	0.573988	0.0330799
2013-12-29	JSE_TOP40	41418.2	40974.7	42052.4	40974.3	133510000	0.0108	0.0107661	0.030972	0.0364904	8.06387e-05	0.125056	0.660626	0.358877	1	0.205272	0.556194	4	63.1791	0.0278407	0	13.8175	1.3	108.733	-0.0502324	0.0270194	3.01	-0.01	0.0278407	4.14597	1.3	0.0270194	-0.01	0.0107661	0.556194	0.997083	0.404686	1	0.233097	0.658716	4	0.658716	2.55362e-05	0	0	0.676048	0.0282425
2014-01-05	JSE_TOP40	40834.3	41418.2	41612.2	40604	293010000	-0.0141	-0.0141985	0.0213823	0.0364904	4.84572e-05	0.112857	0.390871	0.251901	0.957847	0.157053	0.439418	4	59.3754	-0.062094	0	12.874	-1.62	107.014	-0.0012206	0.0110007	2.88	-0.13	-0.062094	4.08388	-1.62	0.0110007	-0.13	-0.0141985	0.439418	0.586448	0.25703	1	0.177727	0.505301	4	0.505301	1.56371e-05	0	0	0.658716	0.0107661
2014-01-12	JSE_TOP40	41976.4	40834.3	42259.2	40811.2	407590000	0.028	0.0275835	0.0199141	0.0364904	6.76745e-05	0.127595	0.551957	0.235523	0.890804	0.215311	0.473399	4	59.3754	-0.062094	0	12.562	0.3	107.828	0.0187078	0.0220602	2.84	-0.04	-0.062094	4.08388	0.3	0.0220602	-0.04	0.0275835	0.473399	0.83166	0.234424	0.875301	0.244625	0.546502	4	0.546502	1.52946e-05	0	0	0.505301	-0.0141985
2014-01-19	JSE_TOP40	41739	41976.4	42638.2	41670.3	460890000	-0.0057	-0.00567018	0.0184853	0.0364904	1.23027e-05	0.124187	0.0878123	0.219584	0.859616	0.201839	0.342213	4	59.3754	-0.062094	0	14.405	5.7	109.14	0.00634222	0.0133601	2.75	-0.09	-0.062094	4.08388	5.7	0.0133601	-0.09	-0.00567018	0.342213	0.125115	0.212423	0.797856	0.229154	0.341137	4	0.341137	1.528e-05	0	0	0.546502	0.0275835
2014-01-26	JSE_TOP40	40586.7	41739	41748.7	40420.9	707710000	-0.0276	-0.0279953	0.0236326	0.0364904	3.95575e-05	0.160102	0.316271	0.277004	0.715195	0.343805	0.413069	4	59.3754	-0.062094	0	17.254	0.27	108.834	-0.00901985	0.0133612	2.67	-0.08	-0.062094	4.08388	0.27	0.0133612	-0.08	-0.0279953	0.413069	0.472887	0.291679	0.439227	0.392172	0.398991	4	0.398991	1.52e-05	0	0	0.341137	-0.00567018
2014-02-02	JSE_TOP40	40777.6	40586.7	40904	39645	599500000	0.0047	0.00469175	0.0230815	0.0364904	7.8261e-06	0.161253	0.0502882	0.270856	0.778512	0.348355	0.362003	4	57.6089	-0.030203	0	18.604	-3.12	107.734	0.0179591	0.0270536	2.71	0.04	-0.030203	4.05368	-3.12	0.0270536	0.04	0.00469175	0.362003	0.0679943	0.283192	0.596456	0.397397	0.33626	4	0.33626	1.28966e-05	0	0	0.398991	-0.0279953
2014-02-09	JSE_TOP40	42093.2	40777.6	42187.8	40777.6	472720000	0.0323	0.0317521	0.0247936	0.0364904	6.7169e-05	0.11524	0.547719	0.289955	0.852694	0.166472	0.46421	4	57.6089	-0.030203	0	14.356	-1.72	109.124	-0.0136231	0.0113636	2.75	0.04	-0.030203	4.05368	-1.72	0.0113636	0.04	0.0317521	0.46421	0.825209	0.309554	0.780667	0.188543	0.525993	4	0.525993	3.41033e-05	0	0	0.33626	0.00469175
2014-02-16	JSE_TOP40	42953	42093.2	43179	42093.2	423940000	0.0204	0.0202212	0.0259317	0.0364904	4.76984e-05	0.0968177	0.38451	0.30265	0.881237	0.0936524	0.415512	4	57.6089	-0.030203	0	14.71	1.11	109.74	0.00367546	0.0168048	2.73	-0.02	-0.030203	4.05368	1.11	0.0168048	-0.02	0.0202212	0.415512	0.576764	0.327078	0.851544	0.104926	0.465078	4	0.465078	0.000794967	0	0	0.525993	0.0317521
2014-02-23	JSE_TOP40	42771.6	42953	43097	42405.5	460380000	-0.0042	-0.0042317	0.0160177	0.0364904	9.19175e-06	0.128767	0.0617355	0.192057	0.859915	0.219942	0.333412	4	57.6089	-0.030203	0	14.058	-0.68	109.172	-0.000458695	0.0123372	2.66	-0.07	-0.030203	4.05368	-0.68	0.0123372	-0.07	-0.0042317	0.333412	0.08542	0.174429	0.798597	0.249942	0.327097	4	0.327097	0.0279898	0	0	0.465078	0.0202212
2014-03-02	JSE_TOP40	43206.3	42771.6	43434.6	42266.8	459460000	0.0102	0.0101108	0.0152807	0.0364904	2.20059e-05	0.12699	0.169148	0.183836	0.860453	0.212919	0.356589	4	147.655	0.941204	1	14.462	0.11	109.142	0.00146708	0.0314777	2.8	0.14	0.941204	4.99488	0.11	0.0314777	0.14	0.0101108	0.356589	0.248928	0.163082	0.799934	0.241877	0.363455	4	0.363455	0.999987	1	0.941204	0.327097	-0.0042317
2014-03-09	JSE_TOP40	41761	43206.3	43206.9	41436.9	482490000	-0.0335	-0.0340223	0.0235999	0.0364904	7.05139e-05	0.141351	0.575758	0.276638	0.846978	0.269685	0.492265	4	147.655	0.941204	1	15.502	3.71	108.012	-0.00975977	0.0113264	2.65	-0.15	0.941204	4.99488	3.71	0.0113264	-0.15	-0.0340223	0.492265	0.867891	0.291174	0.766471	0.307062	0.558149	4	0.558149	1	1	0.941204	0.363455	0.0101108
2014-03-16	JSE_TOP40	41885.4	41761	42548.2	41515.3	5.2931e+08	0.003	0.00297347	0.0193917	0.0364904	5.61764e-06	0.140668	0.0317762	0.229695	0.819582	0.266986	0.33701	4	147.655	0.941204	1	14.96	-2.82	106.532	-0.00817545	0.0190677	2.75	0.1	0.941204	4.99488	-2.82	0.0190677	0.1	0.00297347	0.33701	0.0398144	0.22638	0.698442	0.303962	0.31715	4	0.31715	1	1	0.941204	0.558149	-0.0340223
2014-03-23	JSE_TOP40	43167.6	41885.4	43169.2	41885.4	486090000	0.0306	0.0301536	0.0268116	0.0364904	6.2033e-05	0.182268	0.504668	0.312467	0.844871	0.431426	0.523358	4	147.655	0.941204	1	14.614	-0.59	106.544	-0.00523757	0.0140726	2.73	-0.02	0.941204	4.99488	-0.59	0.0140726	-0.02	0.0301536	0.523358	0.759674	0.340627	0.76124	0.492786	0.588582	4	0.588582	1	1	0.941204	0.31715	0.00297347
2014-03-30	JSE_TOP40	43537.4	43167.6	43840.7	42979.6	609850000	0.0086	0.00853081	0.0266696	0.0349305	1.39884e-05	0.179202	0.101942	0.302468	0.772456	0.419306	0.399043	4	147.655	0.941204	1	13.48	-0.45	105.262	-0.00215912	0.0310584	2.74	0.01	0.941204	4.99488	-0.45	0.0310584	0.01	0.00853081	0.399043	0.146625	0.330203	0.581417	0.478869	0.384279	4	0.384279	1	1	0.941204	0.588582	0.0301536
2014-04-06	JSE_TOP40	43116.9	43537.4	43799.5	42959.6	610500000	-0.0097	-0.00970576	0.0166315	0.0349305	1.58981e-05	0.184868	0.11795	0.190491	0.772075	0.441704	0.380555	4	89.6823	-0.498608	0	15.44	3.07	106.51	0.00870181	0.0226505	2.63	-0.11	-0.498608	4.49627	3.07	0.0226505	-0.11	-0.00970576	0.380555	0.170992	0.175644	0.580473	0.504588	0.357924	4	0.357924	0.99981	1	-0.498608	0.384279	0.00853081
2014-04-13	JSE_TOP40	43446.5	43116.9	43446.5	42857	355390000	0.0076	0.00761549	0.0163241	0.0349305	2.14286e-05	0.170047	0.164308	0.187062	0.921347	0.383116	0.413958	4	89.6823	-0.498608	0	14.815	-3.67	109.07	0.0225681	0.0146033	2.73	0.1	-0.498608	4.49627	-3.67	0.0146033	0.1	0.00761549	0.413958	0.241562	0.17091	0.951147	0.437313	0.450233	4	0.450233	0.999656	1	-0.498608	0.357924	-0.00970576
2014-04-20	JSE_TOP40	43851.2	43446.5	44048.5	43366.9	367170000	0.0093	0.00927064	0.00911422	0.0349305	2.52489e-05	0.161239	0.196332	0.106633	0.914454	0.348299	0.39143	4	89.6823	-0.498608	0	13.418	0.7	109.206	-0.00237097	0.0161841	2.68	-0.05	-0.498608	4.49627	0.7	0.0161841	-0.05	0.00927064	0.39143	0.290309	0.0598971	0.934031	0.397333	0.420393	4	0.420393	0.999255	1	-0.498608	0.450233	0.00761549
2014-04-27	JSE_TOP40	44015.1	43851.2	44129.3	43539.6	291940000	0.0037	0.00373067	0.00860809	0.0349305	1.27789e-05	0.152158	0.0918043	0.100987	0.958474	0.312406	0.365918	4	89.6823	-0.498608	0	13.45	-1.15	109.15	-0.0004566	0.0160391	2.6	-0.08	-0.498608	4.49627	-1.15	0.0160391	-0.08	0.00373067	0.365918	0.131192	0.052104	1	0.356117	0.384853	4	0.384853	0.997865	1	-0.498608	0.420393	0.00927064
2014-05-04	JSE_TOP40	43741.1	44015.1	44096.5	43615.3	312330000	-0.0062	-0.00624391	0.00695701	0.0349305	1.99914e-05	0.14669	0.152262	0.0825685	0.946543	0.290792	0.368041	4	79.5288	-0.120155	0	13.368	0.01	108.48	-0.0112061	0.0109238	2.62	0.02	-0.120155	4.37612	0.01	0.0109238	0.02	-0.00624391	0.368041	0.223223	0.0316183	1	0.331298	0.396535	4	0.396535	0.992905	1	-0.120155	0.384853	0.00373067
2014-05-11	JSE_TOP40	44078	43741.1	44820.1	43741.1	477640000	0.0077	0.00767331	0.0069682	0.0349305	1.6065e-05	0.147362	0.11935	0.0826934	0.849815	0.293444	0.336326	4	79.5288	-0.120155	0	12.428	-0.48	109.532	0.0240932	0.0150554	2.52	-0.1	-0.120155	4.37612	-0.48	0.0150554	-0.1	0.00767331	0.336326	0.173123	0.0316183	0.773518	0.334344	0.328151	4	0.328151	0.990782	1	-0.120155	0.396535	-0.00624391
2014-05-18	JSE_TOP40	44894.8	44078	45043.4	44011	382730000	0.0185	0.0183609	0.0101751	0.0349305	4.79736e-05	0.142578	0.386818	0.118468	0.90535	0.274535	0.421293	4	79.5288	-0.120155	0	12.136	-1.08	110.718	-0.00642275	0.0123125	2.54	0.02	-0.120155	4.37612	-1.08	0.0123125	0.02	0.0183609	0.421293	0.580277	0.0762321	0.911422	0.312631	0.47014	4	0.47014	0.991122	1	-0.120155	0.328151	0.00767331
2014-05-25	JSE_TOP40	44641.6	44894.8	45084.8	44559	360970000	-0.0056	-0.00565738	0.0117907	0.0349305	1.56727e-05	0.0974818	0.116061	0.13649	0.918082	0.0962774	0.316728	4	79.5288	-0.120155	0	11.54	0.04	109.62	-0.00893351	0.0128313	2.48	-0.06	-0.120155	4.37612	0.04	0.0128313	-0.06	-0.00565738	0.316728	0.168117	0.101108	0.94304	0.10794	0.330051	4	0.330051	0.993986	1	-0.120155	0.47014	0.0183609
2014-06-01	JSE_TOP40	44929.1	44641.6	45129.5	44636.4	379430000	0.0064	0.00642065	0.00982697	0.0349305	1.69218e-05	0.0937531	0.126532	0.114584	0.907281	0.0815386	0.307484	4	105.245	0.280172	0	11.588	-0.67	108.984	0	0.0104572	2.6	0.12	0.280172	4.65629	-0.67	0.0104572	0.12	0.00642065	0.307484	0.184056	0.0708715	0.916217	0.0910155	0.31554	4	0.31554	0.999876	1	0.280172	0.330051	-0.00565738
2014-06-08	JSE_TOP40	45803	44929.1	46010.7	44913.7	431120000	0.0195	0.0192648	0.011734	0.0349305	4.46854e-05	0.075188	0.359255	0.135857	0.877036	0.00815337	0.345075	4	105.245	0.280172	0	11.696	1.45	110.978	0.0354417	0.0293564	2.6	0	0.280172	4.65629	1.45	0.0293564	0	0.0192648	0.345075	0.538319	0.100234	0.841112	0.00674824	0.371603	4	0.371603	0.999989	1	0.280172	0.31554	0.00642065
2014-06-15	JSE_TOP40	46336.1	45803	46409.6	45680.6	508450000	0.0116	0.0115705	0.0104662	0.0322972	2.27563e-05	0.0716042	0.175438	0.107511	0.831788	0	0.278684	4	105.245	0.280172	0	11.358	-1.33	114.286	0.012297	0.0116517	2.63	0.03	0.280172	4.65629	-1.33	0.0116517	0.03	0.0115705	0.278684	0.258504	0.0668092	0.728751	0	0.263516	4	0.263516	0.999992	1	0.280172	0.371603	0.0192648
2014-06-22	JSE_TOP40	45651.8	46336.1	46360	45195.6	361820000	-0.0148	-0.0148768	0.0146327	0.0322972	4.11166e-05	0.0637051	0.329339	0.15399	0.917585	0	0.350229	4	105.245	0.280172	0	11.518	0.41	113.086	-0.0169921	0.0116125	2.54	-0.09	0.280172	4.65629	0.41	0.0116125	-0.09	-0.0148768	0.350229	0.49278	0.130962	0.941805	0	0.391387	4	0.391387	0.999992	1	0.280172	0.263516	0.0115705
2014-06-29	JSE_TOP40	47080.4	45651.8	47143.7	45567.2	442950000	0.0313	0.0308122	0.019398	0.0322972	6.95614e-05	0.0686181	0.567773	0.207149	0.870113	0	0.411259	4	105.245	0.280172	0	10.965	-0.94	110.257	-0.0328549	0.0189922	2.65	0.11	0.280172	4.65629	-0.94	0.0189922	0.11	0.0308122	0.411259	0.855737	0.204336	0.823923	0	0.470999	4	0.470999	0.999992	1	0.280172	0.391387	-0.0148768
2014-07-06	JSE_TOP40	46071.1	47080.4	47141.9	45622.5	350990000	-0.0214	-0.0216707	0.0242604	0.0322972	6.17417e-05	0.0501001	0.502226	0.26139	0.923922	0	0.421884	4	148.666	0.345411	1	11.926	1.76	107.032	-0.0298975	0.0145066	2.53	-0.12	0.345411	5.0017	1.76	0.0145066	-0.12	-0.0216707	0.421884	0.755957	0.279203	0.95754	0	0.498175	4	0.498175	1	1	0.345411	0.470999	0.0308122
2014-07-13	JSE_TOP40	46558.1	46071.1	47069.3	46071.1	336790000	0.0106	0.0105158	0.0241192	0.0322972	3.12236e-05	0.0280911	0.246413	0.259815	0.932231	0	0.359615	4	148.666	0.345411	1	12.276	-0.02	105.388	0.00245515	0.0132304	2.5	-0.03	0.345411	5.0017	-0.02	0.0132304	-0.03	0.0105158	0.359615	0.366546	0.277029	0.978173	0	0.405437	4	0.405437	1	1	0.345411	0.498175	-0.0216707
2014-07-20	JSE_TOP40	46384.9	46558.1	46918.7	46212.9	341280000	-0.0037	-0.00372702	0.0222114	0.0322972	1.09207e-05	0.0180076	0.0762282	0.238533	0.929603	0	0.311091	4	148.666	0.345411	1	12.22	0.63	106.342	0.0080782	0.0168554	2.48	-0.02	0.345411	5.0017	0.63	0.0168554	-0.02	-0.00372702	0.311091	0.107481	0.247655	0.971649	0	0.331696	4	0.331696	1	1	0.345411	0.405437	0.0105158
2014-07-27	JSE_TOP40	45733.7	46384.9	47130.3	45476	352270000	-0.014	-0.0141392	0.0139458	0.0322972	4.01373e-05	0.0426351	0.321131	0.146327	0.923173	0	0.347658	4	148.666	0.345411	1	14.63	4.34	105.708	-0.0327119	0.0211395	2.52	0.04	0.345411	5.0017	4.34	0.0211395	0.04	-0.0141392	0.347658	0.480286	0.120386	0.955681	0	0.389088	4	0.389088	1	1	0.345411	0.331696	-0.00372702
2014-08-03	JSE_TOP40	45560.8	45733.7	46370.7	45118.2	419380000	-0.0038	-0.00378709	0.0101278	0.0322972	9.03021e-06	0.047044	0.0603815	0.103737	0.883905	0	0.262006	4	200.703	0.300122	1	16.158	-1.26	103.6	-0.000870364	0.0166536	2.44	-0.08	0.300122	5.30182	-1.26	0.0166536	-0.08	-0.00378709	0.262006	0.0833587	0.0616001	0.85817	0	0.250782	4	0.250782	1	1	0.300122	0.389088	-0.0141392
2014-08-10	JSE_TOP40	46112	45560.8	46645.6	45560.1	392010000	0.0121	0.0120257	0.010795	0.0322972	3.06771e-05	0.0623846	0.241833	0.111179	0.89992	0	0.313233	4	200.703	0.300122	1	13.366	-2.62	101.94	-0.0218112	0.021458	2.34	-0.1	0.300122	5.30182	-2.62	0.021458	-0.1	0.0120257	0.313233	0.359573	0.0718722	0.897938	0	0.332346	4	0.332346	1	1	0.300122	0.250782	-0.00378709
2014-08-17	JSE_TOP40	45982.9	46112	46655.3	45860	410080000	-0.0028	-0.00280385	0.0107672	0.0322972	6.83732e-06	0.0969706	0.042	0.110869	0.889347	0.0942568	0.284118	4	200.703	0.300122	1	11.908	-1.68	99.88	-0.010337	0.0184886	2.4	0.06	0.300122	5.30182	-1.68	0.0184886	0.06	-0.00280385	0.284118	0.0553775	0.0714442	0.871683	0.10562	0.276031	4	0.276031	1	1	0.300122	0.332346	0.0120257
2014-08-24	JSE_TOP40	45630.4	45982.9	46585.8	45480.4	361350000	-0.0077	-0.00769499	0.00865559	0.0322972	2.12951e-05	0.101764	0.16319	0.0873138	0.91786	0.113203	0.320392	4	200.703	0.300122	1	11.828	0.51	100.644	0.0102381	0.00655129	2.35	-0.05	0.300122	5.30182	0.51	0.00655129	-0.05	-0.00769499	0.320392	0.239859	0.0389312	0.942487	0.127375	0.337163	4	0.337163	1	1	0.300122	0.276031	-0.00280385
[truncated: 2,262 more rows]
